# Supplementary material for: The landscape of regulatory genes in brain-wide neuronal phenotypes of a vertebrate brain
Source: eLife. 2021 Dec 13;10:e68224. doi: 10.7554/eLife.68224 (PMC8769648; doi:10.7554/eLife.68224)
Supplement: Figure 1—source data 1. [file elife-68224-fig1-data1.xlsx]

## Sheet: Sheet1
	four brain region (each n = 2)								whole brain (n = 4)				neuromodulators (n = 2)		tectal glutamatergic neurons (n = 2)
	forebrain_1	forebrain_2	ot_1	ot_2	sub-OT_1	sub-OT_2	hindbrain_1	hindbrain_2	whole_1	whole_2	whloe_3	whole_4	Vmat_1	Vmat_2	vglut2a_1	vglut2a_2
Estimated Number of Cells	4333	3024	4307	3007	4718	3237	3047	3345	6399	5394	4905	4694	8601	5719	7659	4075
Fraction Reads in Cells	0.771	0.671	0.648	0.423	0.699	0.588	0.619	0.558	0.641	0.597	0.71	0.705	0.873	0.904	0.854	0.744
mean reads per cell	129363	115854	153598	136375	124334	123340	196375	109874	90135	115212	112762	112589	39161	64841	14011	18928
median genes per cell	636	370	685	892	1190	877	1234	634	925	911	1017	1021	972	953	475	965
Total Genes Detected	18667	16849	18549	19157	20625	19793	20076	18800	20210	20083	20217	20260	20179	20857	17482	17437
Median UMI Counts per Cell	1297	698	1390	1973	2860	1869	3044	1235	1934	1878	2254	2258	2070	1940	911	2164
Avage (mean reads per cell)	126651
Avage (median genes per cell)	866
Avage (median UMI Counts per Cell)	1890.83
Chemistry	Single Cell 3' v2
Cell Ranger Version	2.1.0
Transcriptome	Zv11
