# Supplementary material for: The landscape of regulatory genes in brain-wide neuronal phenotypes of a vertebrate brain
Source: eLife. 2021 Dec 13;10:e68224. doi: 10.7554/eLife.68224 (PMC8769648; doi:10.7554/eLife.68224)
Supplement: Figure 1—source data 2. [file elife-68224-fig1-data2.xlsx]

## Sheet: Table 2_Annotation of whole bra
new ID	Count	Type	Brain region	Nuerotransmitter	Adult.anno	Selected_markers	Markers- from paper	New-markers
1	2974	N	Hind		N.14.Midbrain Glut+ .100	adcyap1b;slc17a6b	vamp1,stmn3, pvalb6,slc17a6b	si:dkey-33c12.3, adcyap1b, si:dkey-7j14.5, atp1b1b, olfm3a, tubb2, si:dkey-56f14.4
2	2489	N	OT	GABA+++	N.7.Optic Tectum Gaba+++.101	tal1;gata3	slc6a1b, gad1b, gad2, slc32a1, tal1,slc6a1a,	gata3, six3a, six3b, si:dkey-175g6.2
3	2430	N	OT	GABA+++	N.7.Optic Tectum Gaba+++.102	emx2;slc6a1b	slc6a1b,tal1,otx2, gad2, gad1b,slc32a1, slc6a1a	emx2, gata3, pax7a, CR936482.1, tfap2b, cxcl14
4	2079	N	Fore	GABA+++	N.2.Ventral Forebrain, Gaba+++, Glut+.103	dlx5a;dlx2a	dlx5a,gad2, gad1b, slc32a1,slc6a1a, slc6a1b,	dlx2a, sp9, dlx6a, prdm12b,vax1, dlx1a, sp8a
5	1546	N	Thalamus		N.4.Midbrain/Thalamus.104	tcf7l2;pou4f2	tcf7l2, lhx9, barhl2	tubb5,cd99l2,tfap2d, meis2a, zfhx4, cbln2b,lmo3
6	1419	N	Hind		N.23.Gaba+ Hindbrain.105	mab21l2;roraa	hoxb3a,	meis1b, mab21l2,roraa,si:ch211-145b13.5, meis2b,esrrb, ddit3, sox4a, mafba
7	1379	N	Pallium	GLU+	N.12.Pallium (Glut+).106	nrgna;rtn4rl2a	nrgna, rtn4r12a, rtn4r12b, eomesa, bhlhe22,egr2a, tbr1b,gabrb3, neurod6a, gem, ngb,gria2b	egr2b, dusp2, dusp5
8	1357	P	OT		N.22.Progenitor.107		stmn1a,her4.2, her2, her15.1, her15.2, tuba8l,dla, ccnd1, mki67, nusap1, tpx2, pcna	her12, rrm2, hmgb2a, DUT
9	1310	N	OT	GLU+	N.14.Midbrain Glut+ .108	barhl1a;lef1	pvalb6,vamp1, slc17a6b,calb2a,	pou4f2, barhl1a, calb2b, pcp4a, lhx9, lef1, bhlhe40, kcnip1b
10	1260	N	OT		N.16.Midbrain.109	foxb1a;CR361551.1	tfap2b, foxb1a,tfap2a, tfap2e,barhl2,pou4f2, tfap2d,lhx2b, pou3f1,lhx9, lef1	CR3615551.1, foxb1a, si:dkey-1c11.1, atf5b
11	1235	N	OT	GABA+++	N.11.Optic Tectum Gaba +++.110	Kcnip1b;ccdc136b	gad2, gad1b, npb, slc32a1,prkcda,sox1a, penkb,rergla, tal1, pax7b	kcnip1b, ccdc136b, zgc:122979, CR936482.1, zgc:114118, camk1db, npy
12	1193	N	Hind	GABA+++	N.2.Ventral Forebrain, Gaba+++, Glut+.111	otpa,;otpb	gad2, gad1b, slc32a1, slc6a1b, slc6a1a,	otpa, otpb, lhx1a, en1b
13	1187	N	HYP		N.20.Hyp.112	gbx2;nkx2.2a	lhx5,kctd4	gbx2, lhx9, nkx2.2a, adcyap1b, scg2b
14	1161	P	Fore		N.8.Progenitor.113		her4.1, her4.2, fabp7a, her15.1, her15.2, her6, id1	her4.4, si:ch211-251b21.1, her4.3, cebpd, zgc:165461, mdka
15	1155	N	Thalamus	GLU+	N.3.Midbrain/Thalamus.114	tcf7l2;cbln2b	pou4f2, barhl1a, barhl2, zgc:158291, pou3f1, sox6, pou4f1, lef1, lhx9, lhx2b, tcf7l2,	bnc2,zgc:158291
16	1015	N	HYP	GABA+, dopaminergic	N.20.Hyp.115	otpa,;otpb	fezf1, opta, lhx5, six6b, kctd4	optb, trh,
17	992	N	Hind	Glyt2	N.23.Gaba+ Hindbrain.116	slc6a5a,;pax2a	hoxa3a, hoxa3b,gad2, gad1b,lmo4a,slc32a1, neurod1,lhx5, neurod6	slc6a5, gbx1, pax2a, mab21l2
18	971	P	OT		N.17.Progenitor.117		her15.2, her15.1, her4.2, her4.1, dla, her4.3, dlb, sox11b,neurod4	adhd6a, si:ch73-21g5.7, nhlh2
19	965	N	Hind	Granule cells	N.1.Granule cells.118	nebl;dlg1	qkia, fat2, neurod1, nebl, cspg5b, neurod2, etv5a	dlg1,tcima,dusp5, zic5
20	960	N	Hind	Phox2+ cells	N.29.Phox2+ Hindbrain cells.119	phox2bb;shox2	phox2a, phox2bb, shox2, meis2b, lmx1bb, tlx2, tlx3b	CR812832.1,drgx,cbln1
21	873	Radial astrocyte	Hind	Radial astrocyte	N.25.Radial Glia.120		cxcl12a,fabp7a, cx43, glula, slc1a2b, ptgdsb.2, ptgdsb.1, s100b, slc3a2a, cxcl12a, mfge8a, mt2, aqp1a.1, zgc:153704, crtac1a	si:ch211-251b21.1,ptn, atp1b4
22	863	N	HYP	GABA++	N.28.Hyp, Gaba+.121	penka;hmx2	hmx3a, hmx2, isl1, gsx1, nkx2.4a, dlx2a, dlx5a, dlx6a, dlx1a	penka,
23	814	N	subOT		N.31.-.122	pvalb7;bnc2		nrgna,pvalb7, prkcbb, kctd4
24	810	N	subOT	Cholinergic, GLU	N.57.Cholinergic cells.123	pax2a;slc5a7a	calb2a, slc5a7a, pax2a, cbln2, lhx9, slc18a3a	evx2, c1ql4b, cpne4a, en1b, en2b, arhgdig
25	747	N	HYP	GLU	N.20.Hyp.124	pdyn;cbln1	fezf1, pdyn,lhx5, six6b, kctd4	acp, cbln1, tac1, si:dkey-19b23.8,adcyap1b
26	666	N	SubTeO	GLU	N.38.Diencephalon.125	pitx2;bhlhe22	pitx2, neurod6a, bhlhe22, foxa1, irx1a, calb2a, irx2a, lmo4a	nme2a, CR936442.1
27	655	N	Hind		N.23.Gaba+ Hindbrain.126	hoxb5a;hoxb5b	hoxb3a, hoxb5a, hoxb5b, hoxa3a, lmo4a	hoxb6a, hoxb6b,
28	652	P	Hind		N.8.Progenitor.127		id1, fabp7a, her15.1, her6, her15.2	hspb1, hmgb2a,BX469902.1
29	638	P	OT		N.22.Progenitor.128		tuba8l, her15.1, her15.2, her4.2, her2, mki67, pcna, dla, ccnd1, stmn1a, nusap1, tpx2	hmgb2a,ube2c, kpna2, aspm, cdk1, si:ch211-69g19.2, kpna2
30	635	N	Fore		N.20.Hyp.129	rprml;syt5b	fezf1, pdyn, otpa, kctd4	rprml, syt5b
31	608	N	Mindbrain	GLU	N.13.Midbrain.130	atf5b;cebpa	atf5b, hunk, gadd45ga, ddit3, tcf7l2	cebpa, cebpb,pou4f2
32	572	N	Fore	GABA+++	N.2.Ventral Forebrain, Gaba+++, Glut+.131	lhx6;lhx8a	gad2, gad1b, slc32a1, slc6a1a, slc6a1b, dlx5a	lhx8a, lhx6, nkx2.1,
33	564	N	Hind	Granule cells	N.6.Granule cell .132	neurod1;zic5	pax6b, neurod1, zic2a, zic5, oprd1b, pax6a, neurod2,	zbtb18, nebl,bcam, ccng1
34	533	N	Hind	Purkinje cells	N.43.Purkinje cells.133	aldoca;pcp4l1	aldoca, ca8, lhx1a, itpr1b, skor1b, pvalb7	pbxip1b, grm1a, casq2,
35	468	N	Fore	Dorsal Habenula	N.34.Dorsal Habenula.134	gng8;tac3a	gng8, kctd12.1, ano2, tac3a, sst1.1, slc17a6b, NWD2, synpr, g0s2	si:dkeyp-72h1.1, zgc:101731
36	422	N	Telencephalon		N.42.Telencephalon, Glut+.135	tbr1b;foxg1a	tbr1b, lhx5, grm2a, lhx1a, uncx, uncx4.1, slc17a6b	foxg1a, crhbp,cbln1
37	412	P	Hind		N.8.Progenitor.136		id1, fabp7a, her15.1, her6, her15.2	hspb1, hmgb2a,BX469902.1
38	389	N	Pallium	GLU+	N.32.Pallium.137	emx3;rprma	stxbp1b, cbln1, eomesa,rtn4rl2b	emx3, rprma, tbr1b, r3hdm1,
39	385	N	Hyp	Dopamine, GABA+	N.37.Hyp.138	prdx1;th2	prdx1, chgb, scg3, ddc, ccka, nkx2.4a, tph1a	si:ch211-131k2.2, txn, th2, txnrd3
40	350	Oligodendrocyte	Oligodendrocyte		N.45.Oligodendrocyte.139		cd59, mpz, plp1b, cldnk, flj13639, ugt8, cx27.5, sox10, olig2
41	340	N	Hind	Cholinergic	N.29.Phox2+ Hindbrain cells.140	prph;slc5a7a		prph, phox2a, slc5a7a, plscr3b, slc18a3a, phox2bb,chata
42	318	Oligodendrocyte	OPC		N.36.OPC.141		aplnrb, sema5a, sox10, olig1, olig2, aplnra, nkx2.2a	si:ch211-286c4.6, si:ch211-132g1.3, traf4a, si:busm1-57f23.1
43	308	N	OT	GLU+	N.57.Cholinergic cells.142	calb2a;si:dkey-183i3.9	tcf7l2, lhx9, barhl2	cbln2b, bcl11ba, ngb
44	284	N	subOT	GLU+	N.35.Diencephalon.143	CR936442.1;nme2a	pitx2, neurod6a, bhlhe22, foxa1, irx1a, calb2a, irx2a, lmo4a	nme2a, CR936442.1
45	283	N	Hind	Torus Longitudinalis	N.5.Torus Longitudinalis.144	dusp5, fxyd1	neurod1, neurod2, fat2, cspg5b, lmo4b, pvalb7, zic2a, wu:fj39g12,galn	dusp5, crlf3, nebl, krt5
46	276	Radial astrocyte	OT	Radial astrocyte	N.33.Optic Tectum Radial Glia.145		slc1a2b, glula, cx43, fabp7a, mfge8a, s1pr1, her4.1, ptgdsb.2, ptgdsb.1, aqp1a.1
47	240	N	Thalamus	GLU+	N.4.Midbrain/Thalamus.146	sp5l;notum1b	pou4f2, barhl1a, barhl2,pou3f1, sox6, pou4f1, lef1	sp5l, neurod6b
48	238	Endothelial	Endothelial		N.56.Cranial ganglion.147	rbp4;serpinf1	serpinf1, f10, twist1a,slc16a9a,six1a,slc12a7b, eya2	bhmt, rbp4, zgc:162730, fxyd1,
49	201	N	Hyp	Serotonergic, GABA+	N.37.Hyp.148	tph2;fev		tph2, txb, ddc, fev,
50	183	N	Hind	Cranial ganglion	N.58.Cranial ganglion.149	dazap1, smpx	itpr1b, prkcda, syt9b, lmo7a,plxdc1, pvalb7, grin1a, grin2aa, myo18aa, daam1b	dazap1, smpx, plxdc1, roraa
51	166	N	subOT		N.2.Ventral Forebrain, Gaba+++, Glut+.150	nts;bsx		nts, bsx,
52	163	N	HYP	GABA+++	N.53.Hyp.151	sst1.2;nts	sst1.1, npy, slc6a1b,gad1b, gad2, sez6a, dlx5a	nts,six3a,six3b,tac3b,pax6a
53	160	P	OT		N.22.Progenitor.152		tuba8l, her15.1, her15.2, her4.2, her2, mki67, pcna, dla, ccnd1, stmn1a, nusap1, tpx2	ahcy
54	148	N	Hind	GLU+	N.23.Gaba+ Hindbrain.153	pou4f1;ppp1r1c		pou4f1, ppp1r1c, foxp4, alcamb, zgc:162928
55	145	Microglia	Microglia		N.39.Microglia.154		apoc1, cd74a, apoeb, ccl34b.1, fcer1gl, mpeg1.1, slc7a7, coro1a	pfn1
56	140	P	subOT		N.8.Progenitor.155			si:dkeyp-110a12.4, six6b, rx3, six3b,shha,
57	131	Endothelial	Endothelial		N.50.Endothelial cells.156		gstp1, epas1b, cxcl12b, icn, krt8, rgcc, pecam1	fabp11a, si:ch73-335l21.4,
58	130	N	subOT	GLU+	N.17.Progenitor.157	tuba8l3;sst6		tubba8l3, sst6, si:ch211-56a11.2, isl2b, tlx2, vim, sncga
59	128	N	Fore	Ventral Habenula	N.52.Ventral Habenula.158	kiss,;GNG14	kiss1, prkcq, aoc, wnt11r, dkk1b, ppp1r14ab	GNG14, csrp2, si:dkeyp-72h1.1,
60	107	N	HYP	GABA+	N.30.Hyp/POA.159	penkb;rtn4r12a	penkb, six3b, rtn4rl2a, six3a, rtn4rl2b, slc32a1, gad1b, pyya, nrgna, dlx5a, dlx2a, foxg1a
61	107	N	OT		N.14.Midbrain Glut+ .160	atf5b;ccdc136b
62	93	N	HYP	GABA+++	N.27.Hyp.161	synpr, sp8a	sst3, synpr, dlx2b, dlx5a, pcp4l1, hlcs, tac1, sall3a, nrgna, slc32a1, gad1b, gad2,	sp8a,
63	90	N	Hind	Cranial ganglion	N.60.Cranial ganglion.162	havcr2;mfge8b	ngfrb, il1rapl1a, cnn3a	mfge8b, havcr2, pou4f2, tfap2b, cdh4, gng13b, neurod1, trim9, cited4b
64	74	N	Hind	Cholinergic-GLU	N.57.Cholinergic cells.163	adcyap1a;slc5a7a	calb2a, slc5a7a,cbln2,lhx9,	adcyap1a, irx4a, pyya
65	44	Radial astrocyte	Fore		N.25.Radial Glia.164		fabp7a, cx43, glula, slc1a2b, ptgdsb.2, ptgdsb.1, s100b, slc3a2a, cxcl12a, mfge8a, mt2, aqp1a.1, zgc:153704, crtac1a	cldn7a, gyg1b, ndnf, spry2, mt2,
66	42	N	Hyp	GLU+	N.20.Hyp.165	foxd2;nr4a2b		foxd2, nr4a2b
67	41	Erythrocytes	Erythrocytes		N.46.Erythrocytes.166	hbbe1.2;hbae5	gpx1a,alas2,aqp1a.1	hbb21.2, si:ch211-103n10.5, hbae5, hbae, hbae1.3, hbbe1.1, hbae3, hbbe2, AL935210.1
68	33	N	Telencephalon	GLU+	N.42.Telencephalon, Glut+.167	tac3b;gabrr2b	tbr1b, lhx5, grm2a, lhx1a, uncx, uncx4.1, slc17a6b	tac3b, apof
	N	Neurons
	P	neuroprogenitors
	qRG	radial astrocyte
