# Supplementary material for: The landscape of regulatory genes in brain-wide neuronal phenotypes of a vertebrate brain
Source: eLife. 2021 Dec 13;10:e68224. doi: 10.7554/eLife.68224 (PMC8769648; doi:10.7554/eLife.68224)
Supplement: Figure 1—source data 3. [file elife-68224-fig1-data3.xlsx]

## Sheet: Sheet1
cells expression >0	1	9	7	5	12	2	8	11	15	3	13	10	14	4	6
	slc17a6a	slc17a6b	gad1b	gad2	slc6a5	slc6a3	th	tph2	slc5a7a	slc18a3a	dbh	hoxb5b	foxg1a	mab21l2	en2a		cell number	Brain region	Transmitter	Adult.anno	Type
1	257	854	260	259	14	1	0	13	33	13	3	24	16	509	131		2974	Hind	GLU+	N.14.Midbrain Glut+ .100	N
2	26	93	1925	2000	9	0	15	16	31	6	2	17	7	130	299		2489	OT	GABA+++	N.7.Optic Tectum Gaba+++.101	N
3	12	24	1619	1558	3	3	1	4	8	6	1	8	13	208	331		2430	OT	GABA+++	N.7.Optic Tectum Gaba+++.102	N
4	13	44	1355	1547	6	2	17	6	14	4	4	7	285	55	18		2079	Fore	GABA+++	N.2.Ventral Forebrain, Gaba+++, Glut+.103	N
5	59	132	78	48	4	1	0	2	6	4	0	2	4	538	383		1546	Thalamus		N.4.Midbrain/Thalamus.104	N
6	38	132	150	192	30	0	0	5	14	7	1	47	1	819	48		1419	Hind		N.23.Gaba+ Hindbrain.105	N
7	148	118	63	67	3	0	2	1	9	2	0	6	420	26	12		1379	Pallium	GLU+	N.12.Pallium (Glut+).106	N
8	10	37	107	99	10	0	0	8	9	2	2	12	54	387	367		1357	OT		N.22.Progenitor.107	P
9	110	245	93	89	1	1	0	3	9	12	0	5	3	176	150		1310	OT	GLU+	N.14.Midbrain Glut+ .108	N
10	99	142	95	108	4	2	0	4	33	15	0	5	0	194	182		1260	OT		N.16.Midbrain.109	N
11	9	20	903	885	3	0	0	2	5	1	10	1	2	51	105		1235	OT	GABA+++	N.11.Optic Tectum Gaba +++.110	N
12	15	84	797	700	29	2	0	4	31	6	2	21	4	240	108		1193	Hind	GABA+++	N.2.Ventral Forebrain, Gaba+++, Glut+.111	N
13	76	121	95	125	2	0	2	7	8	4	0	9	30	78	31		1187	HYP		N.20.Hyp.112	N
14	7	44	86	105	7	1	2	6	5	2	1	2	398	30	17		1161	Fore		N.8.Progenitor.113	P
15	132	229	79	77	2	0	0	1	8	4	2	4	4	87	130		1155	Thalamus	GLU+	N.3.Midbrain/Thalamus.114	N
16	47	172	103	355	5	3	24	5	31	6	0	6	50	34	18		1015	HYP	GABA+	N.20.Hyp.115	N
17	10	64	551	567	284	0	0	4	32	24	0	75	4	602	12		992	Hind	Glyt2	N.23.Gaba+ Hindbrain.116	N
18	16	37	59	66	3	0	2	3	5	1	0	19	18	187	194		971	OT		N.17.Progenitor.117	P
19	13	97	49	73	4	0	6	5	8	4	2	17	5	57	94		965	Hind	Granule cells	N.1.Granule cells.118	N
20	84	226	43	65	5	0	6	9	6	3	21	108	3	516	8		960	Hind	Phox2+ cells	N.29.Phox2+ Hindbrain cells.119	N
21	4	22	85	76	7	1	0	6	7	2	0	41	9	82	96		873	Hind	Radial astrocyte	N.25.Radial Glia.120	Radial astrocyte
22	9	92	375	518	2	2	0	2	3	1	0	3	25	30	11		863	HYP	GABA++	N.28.Hyp, Gaba+.121	N
23	95	76	52	85	9	1	0	4	10	0	6	3	5	115	58		814	subOT		N.31.-.122	N
24	101	229	43	76	2	0	0	4	148	109	0	7	1	184	240		810	subOT	Cholinergic	N.57.Cholinergic cells.123	N
25	99	212	53	85	3	0	0	0	5	11	1	5	3	22	14		747	HYP	GLU	N.20.Hyp.124	N
26	97	134	23	39	1	0	0	4	4	0	0	1	2	12	13		666	SubTeO	GLU	N.38.Diencephalon.125	N
27	27	97	168	149	60	1	2	7	33	22	3	578	0	392	9		655	Hind		N.23.Gaba+ Hindbrain.126	N
28	6	19	55	43	11	0	0	4	5	2	0	19	5	70	195		652	Hind		N.8.Progenitor.127	P
29	4	25	52	68	5	0	1	4	4	1	0	12	44	155	160		638	OT		N.22.Progenitor.128	P
30	29	69	43	34	0	0	0	0	7	2	1	0	123	15	8		635	Fore		N.20.Hyp.129	N
31	48	82	33	51	2	0	0	0	6	0	1	1	2	130	70		608	Mindbrain	GLU	N.13.Midbrain.130	N
32	3	5	375	396	1	0	1	3	5	2	0	2	140	11	4		572	Fore	GABA+++	N.2.Ventral Forebrain, Gaba+++, Glut+.131	N
33	6	25	13	27	6	0	1	2	3	1	0	13	1	27	82		564	Hind	Granule cells	N.6.Granule cell .132	N
34	5	11	231	267	8	0	0	6	7	2	0	12	2	34	74		533	Hind	Purkinje cells	N.43.Purkinje cells.133	N
35	19	186	24	24	1	0	0	2	111	1	1	2	7	26	10		468	Fore	Dorsal Habenula	N.34.Dorsal Habenula.134	N
36	34	107	32	47	1	0	0	1	1	2	0	1	142	24	1		422	Telencephalon		N.42.Telencephalon, Glut+.135	N
37	1	12	34	40	9	0	0	5	4	1	0	48	0	46	57		412	Hind		N.8.Progenitor.136	P
38	70	101	22	14	0	0	0	0	1	0	1	2	53	9	4		389	Pallium	GLU+	N.32.Pallium.137	N
39	2	12	26	317	1	1	7	4	4	0	0	2	1	16	10		385	Hyp	Dopamine, GABA+	N.37.Hyp.138	N
40	1	5	22	15	6	0	1	4	1	0	0	8	1	30	10		350	Oligodendrocyte		N.45.Oligodendrocyte.139	Oligodendrocyte
41	3	15	29	27	2	0	2	2	223	201	0	47	1	230	8		340	Hind	Cholinergic	N.29.Phox2+ Hindbrain cells.140	N
42	2	8	30	36	2	0	0	2	6	2	0	5	1	13	4		318	OPC		N.36.OPC.141	Oligodendrocyte
43	47	84	11	14	2	0	0	0	22	6	0	1	1	31	12		308	OT	GLU+	N.57.Cholinergic cells.142	N
44	64	25	18	17	2	0	0	2	0	0	0	0	1	6	2		284	subOT	GLU+	N.35.Diencephalon.143	N
45	22	35	25	24	0	0	1	0	1	0	0	2	0	20	21		283	Hind	Torus Longitudinalis	N.5.Torus Longitudinalis.144	N
46	2	6	19	23	0	0	0	2	0	0	0	2	2	188	86		276	OT	Radial astrocyte	N.33.Optic Tectum Radial Glia.145	Radial astrocyte
47	24	39	13	11	1	0	0	0	37	26	0	1	1	59	42		240	Thalamus	GLU+	N.4.Midbrain/Thalamus.146	N
48	4	9	22	20	1	1	0	2	2	1	0	4	5	18	6		238	Endothelial		N.56.Cranial ganglion.147	Endothelial
49	0	3	90	115	2	0	1	176	2	1	0	3	0	7	14		201	Hyp	Serotonergic, GABA+	N.37.Hyp.148	N
50	19	32	12	18	0	0	0	0	1	0	1	0	0	31	31		183	Hind	Cranial ganglion	N.58.Cranial ganglion.149	N
51	5	45	25	55	0	0	0	2	2	0	0	1	1	5	5		166	subOT		N.2.Ventral Forebrain, Gaba+++, Glut+.150	N
52	0	6	137	146	0	0	0	0	1	3	0	1	0	3	2		163	HYP	GABA+++	N.53.Hyp.151	N
53	7	30	52	47	10	0	0	5	5	2	1	8	14	110	80		160	OT		N.22.Progenitor.152	P
54	1	49	9	9	2	0	0	0	2	1	0	41	0	10	1		148	Hind	GLU+	N.23.Gaba+ Hindbrain.153	N
55	7	4	12	12	0	0	0	0	0	0	0	2	2	8	4		145	Microglia		N.39.Microglia.154	Microglia
56	2	6	12	17	1	0	0	0	2	0	0	1	1	4	5		140	subOT		N.8.Progenitor.155	P
57	1	8	9	12	0	0	0	2	0	1	0	3	4	8	3		131	Endothelial		N.50.Endothelial cells.156	Endothelial
58	1	33	4	2	1	0	1	1	0	0	0	8	27	29	1		130	subOT	GLU+	N.17.Progenitor.157	N
59	5	22	6	12	0	0	0	0	0	1	0	0	2	3	2		128	Fore	Ventral Habenula	N.52.Ventral Habenula.158	N
60	0	1	80	48	0	0	0	0	0	1	0	0	45	1	0		107	HYP	GABA+	N.30.Hyp/POA.159	N
61	23	54	91	90	0	0	0	1	9	5	1	0	0	35	21		107	OT		N.14.Midbrain Glut+ .160	N
62	1	4	75	73	0	0	0	0	0	0	0	0	23	6	0		93	HYP	GABA+++	N.27.Hyp.161	N
63	1	2	6	6	0	0	0	1	1	0	0	1	0	3	10		90	Hind	Cranial ganglion	N.60.Cranial ganglion.162	N
64	4	12	4	2	1	0	0	0	53	1	0	2	1	4	4		74	Hind	Cholinergic-GLU	N.57.Cholinergic cells.163	N
65	1	0	0	0	0	0	0	0	0	0	0	1	18	1	1		44	Fore		N.25.Radial Glia.164	qRG
66	0	11	1	1	1	0	0	0	0	0	0	0	0	0	0		42	Hyp	GLU+	N.20.Hyp.165	N
67	5	5	4	9	0	0	0	0	1	0	0	4	2	4	3		41	Erythrocytes		N.46.Erythrocytes.166	Erythrocytes
68	2	13	1	3	0	0	0	0	0	0	0	0	2	0	0		33	Telencephalon	GLU+	N.42.Telencephalon, Glut+.167	N

## Sheet: Sheet2
Sum expression
	slc17a6a	slc6a3	slc18a3a	mab21l2	gad2	en2a	gad1b	th	slc17a6b	hoxb5b	tph2	slc6a5	dbh	foxg1a	slc5a7a
1	290	1	17	1025	454	172	478	0	1232	26	14	20	3	17	54
2	28	0	6	231	7638	501	6975	24	112	21	21	13	2	8	39
3	12	3	6	297	4043	440	5331	1	25	9	4	3	1	15	9
4	15	2	5	65	5282	20	3836	19	50	7	6	6	4	384	23
5	66	1	4	933	61	511	86	0	151	2	2	4	0	4	6
6	40	0	7	2048	382	52	262	0	171	69	5	39	1	1	15
7	168	0	4	34	78	13	85	2	137	6	1	7	0	569	9
8	10	0	2	674	147	720	151	0	38	20	9	11	2	97	9
9	118	1	13	236	148	176	151	0	297	5	3	1	0	3	9
10	106	2	16	303	191	222	149	0	168	6	4	10	0	0	54
11	10	0	1	69	2448	117	2068	0	22	1	2	4	10	3	5
12	16	2	7	461	1863	187	2468	0	119	23	4	78	2	4	50
13	85	0	4	126	176	39	123	2	148	9	7	2	0	39	14
14	7	1	2	40	169	19	104	2	45	2	6	7	1	967	5
15	143	0	4	104	114	167	112	0	301	4	1	2	2	5	17
16	60	3	8	43	2113	21	262	118	270	9	6	5	0	59	47
17	12	0	41	1809	2022	13	2207	0	86	189	5	1430	0	4	53
18	16	0	1	330	115	271	81	2	41	22	3	6	0	21	5
19	13	0	4	80	134	123	101	6	117	31	5	4	2	7	8
20	107	0	3	1227	339	10	97	13	302	302	15	5	89	3	9
21	4	1	4	134	117	229	125	0	30	55	6	13	0	12	9
22	9	2	1	40	1750	12	979	0	150	4	2	12	0	30	4
23	110	1	0	156	122	63	74	0	90	3	4	0	6	6	12
24	115	0	201	369	173	410	97	0	304	9	4	3	0	1	395
25	113	0	12	26	182	16	91	0	335	5	0	22	1	3	8
26	116	0	0	18	71	24	46	0	171	1	7	1	0	2	4
27	28	1	28	1036	437	11	416	3	145	2971	9	171	22	0	85
28	6	0	2	119	67	471	74	0	22	21	4	11	0	7	5
29	4	0	1	307	154	349	71	2	29	15	4	5	0	130	4
30	31	0	2	18	59	8	62	0	83	0	0	0	1	144	15
31	49	0	0	198	75	90	76	0	96	1	0	2	6	2	6
32	3	0	3	15	1195	5	1043	1	5	2	3	1	0	197	5
33	6	0	1	35	33	118	18	1	27	14	2	6	0	1	3
34	6	0	2	41	558	93	816	0	13	15	20	9	0	2	10
35	19	0	3	33	38	10	40	0	253	2	2	1	1	10	197
36	34	0	2	41	96	1	45	0	157	1	1	1	0	218	1
37	1	0	1	86	54	155	44	0	14	116	5	17	0	0	4
38	89	0	0	9	18	4	34	0	135	2	0	0	1	66	1
39	2	1	0	21	1406	15	46	9	15	3	4	1	0	1	4
40	1	0	0	47	28	11	31	1	5	17	4	7	0	1	1
41	3	0	455	716	61	10	52	2	18	88	2	2	0	1	683
42	2	0	2	26	76	5	47	0	13	11	2	2	0	1	8
43	55	0	6	40	18	13	13	0	97	1	0	2	0	1	23
44	79	0	0	6	48	2	29	0	33	0	2	2	0	1	0
45	23	0	0	24	59	25	44	1	36	2	0	0	0	0	2
46	2	0	0	481	32	181	26	0	6	3	2	0	0	3	0
47	29	0	44	99	16	60	19	0	50	4	0	1	0	1	61
48	4	1	2	25	35	7	29	0	14	5	4	1	0	7	3
49	0	0	1	7	560	17	347	3	4	12	2695	2	0	0	6
50	21	0	0	32	22	39	17	0	37	0	0	0	1	0	1
51	5	0	0	9	146	6	59	0	65	1	2	0	0	1	2
52	0	0	4	3	673	4	430	0	6	1	0	0	0	0	1
53	8	0	2	613	93	560	82	0	41	9	5	11	1	149	5
54	1	0	1	13	26	1	11	0	67	104	0	2	0	0	2
55	7	0	0	9	22	5	21	0	5	2	0	0	0	9	0
56	4	0	0	4	21	6	15	0	8	1	0	1	0	1	2
57	1	0	2	9	18	3	10	0	10	3	2	0	0	4	0
58	1	0	0	42	2	1	4	1	56	9	1	1	0	46	0
59	5	0	1	3	16	2	17	0	28	0	0	0	0	2	0
60	0	0	1	1	107	0	205	0	1	0	0	0	0	56	0
61	26	0	6	51	500	35	458	0	107	0	1	0	1	0	22
62	2	0	0	10	230	0	245	0	6	0	0	0	0	30	0
63	1	0	0	5	6	11	8	0	2	1	1	0	0	0	1
64	4	0	1	4	2	6	6	0	16	2	0	1	0	1	150
65	1	0	0	1	0	1	0	0	0	1	0	0	0	41	0
66	0	0	0	0	1	0	1	0	12	0	0	1	0	0	0
67	5	0	0	4	21	5	12	0	8	4	0	0	0	4	1
68	2	0	0	0	5	0	1	0	15	0	0	0	0	2	0
