# Supplementary material for: The landscape of regulatory genes in brain-wide neuronal phenotypes of a vertebrate brain
Source: eLife. 2021 Dec 13;10:e68224. doi: 10.7554/eLife.68224 (PMC8769648; doi:10.7554/eLife.68224)
Supplement: Figure 1—source data 4. [file elife-68224-fig1-data4.xlsx]

## Sheet: Sheet1
	p_val	avg_logFC	pct.1	pct.2	p_val_adj	cluster	gene
1	0	1.14795	0.673	0.347	0	1	adcyap1b
2	0	1.09076	0.408	0.153	0	1	si:dkey-33c12.3
3	0	0.786839	0.704	0.381	0	1	si:dkey-7j14.5
4	0	0.668436	0.951	0.728	0	1	snap25a
5	3.41255e-239	0.85738	0.205	0.054	5.88255e-235	1	olfm3a
6	1.17142e-233	0.728221	0.287	0.097	2.0193e-229	1	slc17a6b
7	3.24701e-220	0.684184	0.475	0.224	5.59719e-216	1	atp1b1b
8	1.1798e-218	0.60195	0.743	0.478	2.03374e-214	1	scg2b
9	5.83214e-210	0.645862	0.598	0.346	1.00534e-205	1	CAMK2N1
10	6.65643e-197	0.599796	0.508	0.26	1.14744e-192	1	fndc4b
11	6.39943e-195	0.62113	0.439	0.206	1.10313e-190	1	nrn1a
12	1.02204e-189	0.630228	0.604	0.373	1.76179e-185	1	calm2a
13	1.44867e-170	0.607242	0.233	0.081	2.49722e-166	1	si:dkeyp-69c1.7
14	2.67527e-158	0.586173	0.133	0.034	4.61163e-154	1	ntng1a
15	2.09201e-157	0.61834	0.145	0.039	3.60621e-153	1	vav3b
16	2.61814e-148	0.643288	0.253	0.101	4.51316e-144	1	tubb2
17	4.20809e-147	0.608217	0.277	0.116	7.25391e-143	1	si:dkey-56f14.4
18	4.36393e-144	0.597441	0.281	0.119	7.52254e-140	1	bdnf
19	8.26149e-118	0.632035	0.247	0.109	1.42412e-113	1	vamp1
20	2.51695e-67	0.584959	0.104	0.038	4.33872e-63	1	pitx2
21	0	1.83674	0.554	0.095	0	2	tal1
22	0	1.60491	0.458	0.046	0	2	gata3
23	0	1.43862	0.247	0.041	0	2	six3a
24	0	1.37338	0.773	0.211	0	2	gad1b
25	0	1.32811	0.804	0.236	0	2	gad2
26	0	1.06	0.308	0.08	0	2	nxph1
27	0	1.03612	0.55	0.157	0	2	slc32a1
28	0	1.00989	0.26	0.049	0	2	si:dkey-175g6.2
29	0	1.00261	0.766	0.285	0	2	slc6a1b
30	0	0.97963	0.426	0.118	0	2	lhx1a
31	0	0.903039	0.18	0.022	0	2	gata2a
32	0	0.823162	0.947	0.632	0	2	elavl4
33	1.40469e-283	1.4587	0.178	0.033	2.4214e-279	2	six3b
34	2.4996e-280	0.836278	0.526	0.224	4.30882e-276	2	atp1b1b
35	4.65614e-235	0.909295	0.217	0.054	8.02626e-231	2	emx2
36	5.10808e-176	0.655077	0.225	0.069	8.80532e-172	2	lhx5
37	1.14961e-121	0.639898	0.575	0.362	1.98169e-117	2	id4
38	3.37282e-118	0.64328	0.301	0.135	5.81407e-114	2	vgf
39	2.98553e-115	0.758243	0.155	0.049	5.14646e-111	2	nkx2.2a
40	4.51294e-79	0.823947	0.152	0.059	7.77941e-75	2	en1b
41	0	1.54856	0.501	0.099	0	3	tal1
42	0	1.54323	0.297	0.05	0	3	emx2
43	0	1.47998	0.786	0.284	0	3	slc6a1b
44	0	1.42408	0.666	0.218	0	3	gad1b
45	0	1.3687	0.226	0.039	0	3	pax7a
46	0	1.36464	0.225	0.029	0	3	CR936482.1
47	0	1.35839	0.342	0.053	0	3	gata3
48	0	1.30444	0.256	0.033	0	3	sox14
49	0	1.15921	0.229	0.038	0	3	SYNPR
50	0	1.14426	0.213	0.026	0	3	zfpm2b
51	0	1.07142	0.188	0.032	0	3	otx2b
52	0	1.05748	0.179	0.021	0	3	pax7b
53	0	1.04857	0.483	0.161	0	3	slc32a1
54	0	0.949155	0.117	0.011	0	3	nxph2b
55	0	0.948034	0.641	0.246	0	3	gad2
56	1.66655e-269	1.35232	0.288	0.083	2.8728e-265	3	tfap2b
57	1.62692e-207	1.31062	0.116	0.019	2.80448e-203	3	dmbx1a
58	1.5064e-161	1.05247	0.155	0.039	2.59674e-157	3	calb2b
59	1.62745e-131	1.48461	0.241	0.097	2.8054e-127	3	cxcl14
60	4.304e-50	1.16266	0.129	0.059	7.41924e-46	3	ndnf
61	0	2.15854	0.637	0.041	0	4	dlx5a
62	0	2.13619	0.551	0.035	0	4	dlx2a
63	0	1.59696	0.339	0.026	0	4	sp9
64	0	1.49636	0.302	0.014	0	4	dlx6a
65	0	1.35861	0.151	0.014	0	4	prdm12b
66	0	1.17255	0.174	0.02	0	4	vax1
67	0	1.14379	0.744	0.244	0	4	gad2
68	0	1.13579	0.214	0.01	0	4	dlx1a
69	0	1.0453	0.222	0.033	0	4	isl1
70	0	0.989419	0.17	0.006	0	4	dlx2b
71	0	0.919801	0.652	0.222	0	4	gad1b
72	6.14637e-286	1.00887	0.234	0.049	1.05951e-281	4	ncaldb
73	6.1676e-274	0.858663	0.665	0.322	1.06317e-269	4	islr2
74	4.64458e-271	0.805659	0.467	0.164	8.00633e-267	4	slc32a1
75	4.79473e-243	1.21612	0.108	0.012	8.26515e-239	4	sp8a
76	2.55968e-232	0.918908	0.206	0.045	4.41237e-228	4	six3a
77	6.12339e-212	0.888286	0.217	0.053	1.05555e-207	4	si:dkey-175g6.2
78	1.92107e-169	0.807949	0.364	0.146	3.31154e-165	4	plcxd3
79	1.29013e-165	0.852919	0.479	0.232	2.22392e-161	4	kctd4
80	2.14855e-99	0.880623	0.135	0.039	3.70367e-95	4	pax6a
81	0	1.91999	0.376	0.08	0	5	pou4f2
82	0	1.48048	0.327	0.059	0	5	barhl1a
83	0	1.42179	0.549	0.188	0	5	tcf7l2
84	0	1.3625	0.387	0.089	0	5	lef1
85	0	1.33092	0.428	0.092	0	5	barhl2
86	0	1.29167	0.246	0.032	0	5	bnc2
87	0	1.24434	0.319	0.06	0	5	pou4f1
88	0	1.22601	0.173	0.011	0	5	zgc:158291
89	0	1.15485	0.475	0.136	0	5	lhx9
90	1.1736e-297	1.31549	0.576	0.219	2.02304e-293	5	ebf3a
91	1.35777e-292	1.10128	0.728	0.377	2.34052e-288	5	cd99l2
92	2.16049e-292	1.22558	0.726	0.39	3.72425e-288	5	ctnnbip1
93	3.9711e-281	0.991553	0.819	0.48	6.84539e-277	5	tubb5
94	3.06204e-267	1.21043	0.208	0.034	5.27835e-263	5	tfap2d
95	4.17804e-258	1.16294	0.275	0.06	7.2021e-254	5	mcama
96	6.16409e-245	1.04811	0.524	0.199	1.06257e-240	5	mab21l1
97	4.4122e-243	1.23959	0.453	0.157	7.60574e-239	5	pou3f1
98	8.33882e-202	1.45032	0.592	0.308	1.43744e-197	5	lmo3
99	2.40222e-159	1.01587	0.301	0.099	4.14094e-155	5	ppp1r14c
100	2.61555e-44	0.925956	0.14	0.058	4.50869e-40	5	sox6
101	0	1.63088	0.577	0.144	0	6	mab21l2
102	0	1.57466	0.603	0.149	0	6	meis1b
103	0	1.2391	0.163	0.007	0	6	si:ch211-145b13.5
104	8.25537e-286	1.46744	0.396	0.106	1.42306e-281	6	roraa
105	1.66966e-261	1.22979	0.397	0.107	2.87816e-257	6	meis2b
106	4.73058e-209	1.20717	0.721	0.426	8.15457e-205	6	sox4a
107	3.52584e-198	0.964707	0.182	0.032	6.07785e-194	6	hoxb3a
108	3.49105e-197	1.12704	0.174	0.03	6.01787e-193	6	esrrb
109	3.43487e-179	1.21659	0.433	0.167	5.92103e-175	6	ddit3
110	4.28499e-179	0.846719	0.164	0.028	7.38646e-175	6	si:dkey-1c11.1
111	8.6747e-160	1.10927	0.578	0.312	1.49535e-155	6	nr2f1a
112	2.46778e-143	0.939099	0.214	0.055	4.25396e-139	6	hunk
113	2.77658e-136	1.34442	0.162	0.035	4.78626e-132	6	mafba
114	3.53734e-119	0.920114	0.477	0.249	6.09766e-115	6	r3hdm1
115	7.38813e-109	0.970952	0.425	0.216	1.27357e-104	6	mycn
116	2.99165e-103	0.989412	0.147	0.037	5.15701e-99	6	arhgef1b
117	2.40904e-94	0.855357	0.482	0.276	4.1527e-90	6	nanos1
118	1.96068e-93	0.82316	0.279	0.111	3.37982e-89	6	BX957317.1
119	2.45577e-76	0.895401	0.385	0.214	4.23326e-72	6	pik3r3b
120	2.12985e-28	0.88554	0.125	0.058	3.67144e-24	6	CR361551.1
121	0	2.33588	0.203	0.013	0	7	rtn4rl2b
122	0	2.22515	0.481	0.074	0	7	rtn4rl2a
123	0	2.21277	0.429	0.028	0	7	eomesa
124	0	2.0841	0.759	0.201	0	7	nrgna
125	0	2.0625	0.722	0.07	0	7	bhlhe22
126	0	1.96363	0.343	0.051	0	7	egr2b
127	0	1.91146	0.625	0.073	0	7	neurod6a
128	0	1.80451	0.592	0.155	0	7	dusp5
129	0	1.7451	0.422	0.04	0	7	egr3
130	0	1.72391	0.462	0.037	0	7	bhlhe23
131	0	1.6155	0.479	0.082	0	7	zbtb18
132	0	1.51537	0.281	0.016	0	7	emx3
133	0	1.43706	0.346	0.024	0	7	tbr1b
134	0	1.38867	0.395	0.056	0	7	draxin
135	1.09617e-304	1.757	0.39	0.097	1.88958e-300	7	phlda2
136	3.66571e-292	1.58938	0.275	0.051	6.31895e-288	7	egr2a
137	3.81905e-287	1.83358	0.422	0.121	6.58327e-283	7	dusp2
138	2.97475e-241	1.77216	0.589	0.264	5.12787e-237	7	itm2cb
139	8.70648e-231	1.49059	0.507	0.199	1.50082e-226	7	sat1a.2
140	4.1715e-217	1.61433	0.794	0.553	7.19084e-213	7	egr4
141	0	2.3174	0.695	0.103	0	8	her12
142	0	2.21239	0.856	0.13	0	8	pcna
143	0	2.21002	0.615	0.072	0	8	rrm2
144	0	2.17661	0.931	0.179	0	8	stmn1a
145	0	1.9548	0.962	0.345	0	8	hmgb2a
146	0	1.91957	0.682	0.064	0	8	DUT
147	0	1.85467	0.86	0.252	0	8	her15.1
148	0	1.84157	0.865	0.27	0	8	her15.2
149	0	1.82642	0.593	0.087	0	8	her2
150	0	1.75827	0.702	0.071	0	8	ccnd1
151	0	1.73894	0.637	0.06	0	8	hells
152	0	1.71829	0.534	0.036	0	8	zgc:110540
153	0	1.64846	0.714	0.128	0	8	npm1a
154	0	1.63956	0.85	0.349	0	8	her4.2
155	0	1.62019	0.827	0.152	0	8	eef1da
156	0	1.61844	0.526	0.047	0	8	cdca7a
157	0	1.59469	0.707	0.08	0	8	ahcy
158	0	1.55655	0.669	0.057	0	8	nutf2l
159	0	1.55551	0.769	0.224	0	8	her4.4
160	0	1.5234	0.695	0.088	0	8	si:ch211-156b7.4
161	0	1.75239	0.328	0.037	0	9	calb2b
162	0	1.67011	0.362	0.059	0	9	barhl1a
163	0	1.53577	0.905	0.502	0	9	pcp4a
164	0	1.428	0.505	0.115	0	9	calb2a
165	4.49469e-258	1.53862	0.348	0.082	7.74794e-254	9	pou4f2
166	1.59755e-256	1.2454	0.46	0.139	2.75385e-252	9	lhx9
167	2.72297e-253	1.02882	0.109	0.008	4.69386e-249	9	sp5l
168	1.33918e-220	0.955508	0.753	0.424	2.30849e-216	9	cplx2l
169	1.11335e-174	1.09467	0.644	0.36	1.91919e-170	9	bhlhe40
170	1.94783e-168	1.14737	0.313	0.093	3.35767e-164	9	lef1
171	9.84749e-168	0.973735	0.573	0.278	1.69751e-163	9	c1qtnf4
172	2.73331e-167	0.929053	0.505	0.213	4.71167e-163	9	nrn1a
173	2.75444e-157	1.13065	0.397	0.15	4.7481e-153	9	oaz2b
174	1.1543e-136	1.09562	0.266	0.081	1.98979e-132	9	rims2b
175	1.75619e-116	0.904177	0.286	0.101	3.02732e-112	9	fgf12a
176	5.81628e-110	0.971215	0.369	0.159	1.00261e-105	9	smu1b
177	1.531e-92	1.00594	0.251	0.093	2.63913e-88	9	btbd6a
178	2.90661e-88	1.04814	0.437	0.24	5.01041e-84	9	kcnip1b
179	1.4447e-85	0.833583	0.302	0.131	2.49037e-81	9	gabrb2
180	2.24904e-54	0.896168	0.279	0.141	3.8769e-50	9	pvalb6
181	0	3.14686	0.497	0.047	0	10	CR361551.1
182	0	2.69031	0.59	0.045	0	10	foxb1a
183	0	2.20807	0.718	0.076	0	10	tfap2b
184	0	1.95081	0.451	0.033	0	10	tfap2e
185	0	1.64029	0.452	0.079	0	10	tfap2a
186	0	1.63467	0.421	0.081	0	10	pou4f2
187	0	1.31301	0.431	0.094	0	10	barhl2
188	0	1.26686	0.27	0.033	0	10	tfap2d
189	0	1.20171	0.352	0.061	0	10	pou4f1
190	1.02538e-279	1.545	0.206	0.028	1.76755e-275	10	si:dkey-1c11.1
191	3.6724e-191	1.06958	0.795	0.505	6.33048e-187	10	pcp4a
192	4.25028e-184	1.45101	0.191	0.035	7.32664e-180	10	mafba
193	9.91614e-172	0.979033	0.325	0.093	1.70934e-167	10	lef1
194	4.14928e-165	0.918914	0.411	0.14	7.15253e-161	10	lhx9
195	3.17561e-123	1.0341	0.562	0.31	5.47412e-119	10	lmo3
196	9.03381e-121	1.52624	0.249	0.077	1.55725e-116	10	atf5b
197	3.71345e-111	0.913051	0.387	0.163	6.40125e-107	10	bcl11ba
198	2.83382e-106	0.98487	0.345	0.139	4.88494e-102	10	pvalb6
199	5.71037e-69	0.875099	0.329	0.157	9.84354e-65	10	cbln2b
200	3.08008e-34	1.4145	0.332	0.215	5.30943e-30	10	nrgna
201	0	1.87732	0.777	0.231	0	11	kcnip1b
202	0	1.86386	0.532	0.063	0	11	ccdc136b
203	0	1.79229	0.822	0.418	0	11	zgc:122979
204	0	1.74725	0.383	0.03	0	11	CR936482.1
205	0	1.67701	0.353	0.069	0	11	zgc:114118
206	0	1.64668	0.521	0.107	0	11	camk1db
207	0	1.62258	0.66	0.105	0	11	tal1
208	0	1.52205	0.301	0.025	0	11	penkb
209	0	1.51504	0.564	0.184	0	11	fam107b
210	0	1.47443	0.215	0.024	0	11	zgc:195170
211	0	1.35428	0.571	0.178	0	11	chn1
212	0	1.27358	0.285	0.045	0	11	egr3
213	0	1.19455	0.23	0.027	0	11	si:dkey-164f24.2
214	0	1.19452	0.253	0.032	0	11	si:ch211-153l6.6
215	5.4574e-253	1.18923	0.385	0.097	9.40747e-249	11	cxcl14
216	2.63468e-251	1.57233	0.151	0.016	4.54166e-247	11	npb
217	1.02056e-222	1.20539	0.528	0.203	1.75924e-218	11	pik3ip1
218	5.65342e-221	1.20149	0.377	0.106	9.74536e-217	11	hivep1
219	8.96923e-160	1.18472	0.421	0.158	1.54612e-155	11	smu1b
220	4.81987e-53	1.86074	0.123	0.038	8.30849e-49	11	npy
221	0	2.91122	0.877	0.064	0	12	otpa
222	0	2.51511	0.548	0.039	0	12	otpb
223	0	1.25345	0.52	0.124	0	12	lhx1a
224	1.69788e-302	1.13399	0.668	0.231	2.9268e-298	12	gad1b
225	4.91349e-180	1.09162	0.538	0.218	8.46988e-176	12	BX005003.1
226	1.98207e-176	0.814028	0.659	0.302	3.41669e-172	12	slc6a1b
227	3.53925e-176	1.5745	0.348	0.102	6.10096e-172	12	nhlh2
228	3.14105e-138	1.15643	0.235	0.059	5.41454e-134	12	en1b
229	7.33126e-138	1.1421	0.199	0.044	1.26376e-133	12	calb1
230	1.0285e-124	0.877334	0.221	0.058	1.77294e-120	12	shdb
231	1.24081e-109	0.904384	0.42	0.186	2.1389e-105	12	msi2b
232	1.88725e-107	0.934455	0.107	0.018	3.25324e-103	12	pnocb
233	1.32498e-97	0.773895	0.234	0.073	2.284e-93	12	lhx5
234	1.60631e-85	0.761013	0.282	0.107	2.76895e-81	12	cox8b
235	1.64532e-75	0.995942	0.277	0.112	2.83621e-71	12	meis2b
236	2.88023e-65	0.855276	0.205	0.075	4.96495e-61	12	msi2a
237	3.71925e-63	0.900666	0.341	0.165	6.41124e-59	12	si:dkey-33c12.3
238	5.55136e-56	0.79365	0.144	0.047	9.56943e-52	12	pax7a
239	2.27281e-36	1.68017	0.107	0.038	3.91788e-32	12	cort
240	2.96257e-05	1.24317	0.101	0.072	0.510688	12	sst1.1
241	6.08059e-182	1.15437	0.108	0.011	1.04817e-177	13	gbx2
242	7.95462e-178	0.987655	0.789	0.483	1.37122e-173	13	tubb5
243	2.55262e-175	1.22397	0.498	0.193	4.4002e-171	13	tcf7l2
244	6.49623e-158	1.08517	0.407	0.141	1.11982e-153	13	lhx9
245	1.5553e-127	0.881834	0.649	0.382	2.68102e-123	13	cd99l2
246	8.79651e-109	0.674194	0.773	0.556	1.51634e-104	13	tuba1a
247	1.18602e-98	1.14117	0.189	0.052	2.04445e-94	13	nkx2.2a
248	9.0391e-97	0.868007	0.156	0.037	1.55816e-92	13	sp9
249	2.25068e-95	0.623963	0.762	0.535	3.87972e-91	13	gap43
250	1.31698e-82	0.726073	0.591	0.362	2.27021e-78	13	adcyap1b
251	4.89096e-62	1.00582	0.291	0.137	8.43104e-58	13	nr2f2
252	8.50687e-57	0.870413	0.126	0.037	1.46641e-52	13	shox2
253	3.55425e-55	0.632863	0.6	0.43	6.12682e-51	13	sox4a
254	8.69827e-55	0.677504	0.504	0.33	1.49941e-50	13	tmsb
255	4.37159e-37	0.674437	0.454	0.317	7.53575e-33	13	nr2f1a
256	5.16633e-37	0.657166	0.223	0.111	8.90572e-33	13	cpne2
257	6.93064e-35	0.537544	0.128	0.049	1.1947e-30	13	lhx2b
258	1.82844e-33	0.882212	0.293	0.174	3.15186e-29	13	zic2a
259	6.38633e-24	0.611853	0.152	0.077	1.10088e-19	13	BX569787.1
260	1.13667e-11	0.542504	0.143	0.089	1.9594e-07	13	tmem178
261	0	2.39869	0.972	0.221	0	14	her4.4
262	0	2.36228	0.907	0.164	0	14	si:ch211-251b21.1
263	0	2.35695	0.978	0.312	0	14	her4.1
264	0	2.33967	0.986	0.348	0	14	her4.2
265	0	2.28264	0.907	0.15	0	14	her4.3
266	0	2.08992	0.906	0.133	0	14	cebpd
267	0	2.05412	0.83	0.121	0	14	zgc:165461
268	0	2.01917	0.818	0.197	0	14	mdka
269	0	1.95604	0.83	0.212	0	14	id1
270	0	1.80216	0.786	0.136	0	14	her6
271	0	1.78514	0.715	0.108	0	14	her9
272	0	1.71759	0.629	0.107	0	14	her12
273	0	1.70248	0.549	0.044	0	14	her8.2
274	0	1.6731	0.623	0.088	0	14	her2
275	0	1.66823	0.668	0.074	0	14	eif4ebp3l
276	0	1.6539	0.727	0.105	0	14	sox3
277	0	1.62104	0.969	0.251	0	14	her15.1
278	0	1.61454	0.984	0.561	0	14	fabp7a
279	0	1.60637	0.966	0.27	0	14	her15.2
280	6.47723e-196	1.90953	0.499	0.173	1.11654e-191	14	mt2
281	0	2.03065	0.868	0.183	0	15	tcf7l2
282	0	1.9518	0.747	0.147	0	15	cbln2b
283	2.84789e-279	1.25439	0.502	0.139	4.9092e-275	15	lhx9
284	5.02433e-277	1.2348	0.533	0.16	8.66094e-273	15	bcl11ba
285	1.75209e-200	0.912183	0.807	0.474	3.02025e-196	15	olfm1b
286	1.39054e-187	1.14034	0.203	0.035	2.39701e-183	15	tfap2d
287	4.69097e-185	1.17031	0.283	0.066	8.08629e-181	15	mef2cb
288	1.90614e-182	1.13357	0.352	0.097	3.2858e-178	15	barhl2
289	1.25583e-139	1.11819	0.442	0.176	2.1648e-135	15	ngb
290	1.2588e-123	0.973232	0.281	0.085	2.16991e-119	15	meis2a
291	5.33756e-118	0.977907	0.737	0.512	9.20089e-114	15	id2a
292	5.83128e-112	0.810548	0.48	0.214	1.0052e-107	15	nrn1a
293	1.48413e-111	0.80353	0.268	0.083	2.55834e-107	15	ak5
294	1.67363e-102	0.864382	0.431	0.196	2.885e-98	15	tspan18b
295	1.7819e-101	0.8626	0.441	0.201	3.07164e-97	15	zfhx4
296	2.44855e-91	0.816278	0.32	0.125	4.22081e-87	15	bdnf
297	4.28863e-90	0.876183	0.132	0.028	7.39273e-86	15	rprml
298	5.3693e-71	0.802399	0.43	0.231	9.25561e-67	15	pcdh19
299	9.74623e-55	0.881762	0.484	0.313	1.68006e-50	15	lmo3
300	1.35497e-40	0.901875	0.172	0.073	2.3357e-36	15	irx1a
301	0	2.95731	0.642	0.039	0	16	otpb
302	0	2.84292	0.755	0.07	0	16	otpa
303	1.74502e-271	0.932035	0.167	0.015	3.00807e-267	16	scgn
304	1.49247e-265	1.03419	0.17	0.016	2.57272e-261	16	six6b
305	1.26767e-253	2.10049	0.161	0.015	2.18522e-249	16	trh
306	2.70567e-214	1.20717	0.847	0.487	4.66403e-210	16	scg2b
307	1.50473e-150	0.999172	0.419	0.134	2.59386e-146	16	plk2b
308	3.20543e-132	1.06535	0.149	0.024	5.52552e-128	16	fezf1
309	3.98951e-128	1.16368	0.128	0.019	6.87712e-124	16	foxo1a
310	1.81571e-113	0.998764	0.305	0.093	3.12992e-109	16	kctd12.1
311	4.31706e-108	0.971477	0.35	0.119	7.44175e-104	16	rgs5b
312	1.2157e-79	1.02892	0.332	0.133	2.09563e-75	16	cbln1
313	4.23692e-59	1.71645	0.125	0.032	7.3036e-55	16	penka
314	1.96646e-40	4.33455	0.113	0.035	3.38979e-36	16	oxt
315	1.51941e-36	1.48281	0.161	0.065	2.61916e-32	16	crabp1a
316	1.75364e-36	1.62577	0.113	0.037	3.02292e-32	16	crhbp
317	1.81177e-34	1.5753	0.167	0.07	3.12312e-30	16	sst1.1
318	8.18781e-32	1.26992	0.109	0.038	1.41141e-27	16	cort
319	6.78651e-22	1.66727	0.102	0.042	1.16986e-17	16	ccka
320	4.05539e-18	3.73254	0.111	0.05	6.99067e-14	16	pmchl
321	0	2.09776	0.286	0.007	0	17	slc6a5
322	0	1.75969	0.233	0.021	0	17	gbx1
323	0	1.46753	0.607	0.147	0	17	mab21l2
324	0	1.44337	0.327	0.037	0	17	pax2a
325	0	1.29934	0.297	0.041	0	17	hoxa3a
326	0	1.23675	0.312	0.031	0	17	hoxb3a
327	2.5773e-251	0.890423	0.976	0.737	4.44274e-247	17	snap25a
328	2.76645e-248	1.04052	0.456	0.109	4.7688e-244	17	meis2b
329	2.136e-236	1.06291	0.567	0.169	3.68204e-232	17	slc32a1
330	1.31892e-226	1.04806	0.818	0.393	2.27356e-222	17	si:dkey-7j14.5
331	2.10536e-214	1.24201	0.52	0.161	3.62921e-210	17	si:dkey-33c12.3
332	4.59712e-202	0.965011	0.827	0.424	7.92451e-198	17	cplx2l
333	3.73903e-184	1.26858	0.398	0.112	6.44533e-180	17	vamp1
334	4.98214e-158	0.949803	0.54	0.204	8.58821e-154	17	oip5-as1
335	3.05453e-151	1.03133	0.429	0.138	5.26539e-147	17	pvalb6
336	7.93217e-135	0.972869	0.555	0.235	1.36735e-130	17	gad1b
337	2.3651e-134	0.885607	0.35	0.106	4.07695e-130	17	tubb2
338	8.73193e-122	1.15633	0.205	0.045	1.50521e-117	17	calb1
339	3.11715e-96	1.44449	0.227	0.065	5.37334e-92	17	lmo4a
340	8.72733e-91	0.871685	0.333	0.122	1.50442e-86	17	si:dkey-56f14.4
341	0	3.18054	0.759	0.106	0	18	abhd6a
342	0	2.44206	0.923	0.274	0	18	her15.2
343	0	2.41462	0.921	0.256	0	18	her15.1
344	0	2.06228	0.884	0.353	0	18	her4.2
345	0	2.04816	0.481	0.051	0	18	si:ch73-21g5.7
346	0	1.91446	0.825	0.228	0	18	her4.4
347	0	1.88315	0.613	0.077	0	18	dla
348	0	1.75437	0.526	0.041	0	18	dlb
349	0	1.74406	0.478	0.024	0	18	ebf2
350	0	1.68345	0.48	0.101	0	18	nhlh2
351	0	1.48602	0.469	0.069	0	18	cdkn1ca
352	0	1.48413	0.963	0.535	0	18	hmga1a
353	0	1.42174	0.674	0.159	0	18	her4.3
354	0	1.4089	0.874	0.321	0	18	sox11b
355	6.68655e-305	1.41632	0.59	0.161	1.15263e-300	18	insm1a
356	3.50068e-288	1.52722	0.774	0.32	6.03448e-284	18	her4.1
357	1.9459e-266	1.68251	0.201	0.022	3.35435e-262	18	dbx1a
358	1.26293e-261	1.68928	0.205	0.024	2.17703e-257	18	neurog1
359	4.91395e-245	1.44614	0.413	0.095	8.47066e-241	18	her2
360	2.51357e-163	1.57506	0.386	0.114	4.3329e-159	18	her12
361	0	2.68733	0.784	0.031	0	19	nebl
362	0	2.54957	0.825	0.183	0	19	ccng1
363	0	2.5247	0.601	0.054	0	19	tcima
364	0	2.47023	0.617	0.041	0	19	dlg1
365	0	2.40142	0.919	0.221	0	19	qkia
366	0	2.373	0.766	0.083	0	19	cspg5b
367	0	2.27893	0.91	0.168	0	19	neurod1
368	0	2.2337	0.718	0.077	0	19	zic5
369	0	2.1831	0.902	0.161	0	19	zic2a
370	0	2.16366	0.461	0.007	0	19	olfm2b
371	0	2.14306	0.795	0.155	0	19	dusp5
372	0	1.85545	0.911	0.363	0	19	sypb
373	0	1.84321	0.389	0.013	0	19	si:ch211-237l4.6
374	0	1.78558	0.252	0.017	0	19	gsg1l
375	0	1.67573	0.582	0.105	0	19	zic1
376	0	1.65904	0.514	0.116	0	19	olfm1a
377	0	1.62458	0.951	0.503	0	19	snap25b
378	0	1.6112	0.32	0.006	0	19	fat2
379	0	1.57401	0.693	0.25	0	19	ndrg3b
380	0	1.57251	0.379	0.052	0	19	sept9b
381	0	3.26265	0.817	0.018	0	20	phox2bb
382	0	2.17097	0.461	0.009	0	20	phox2a
383	0	1.98925	0.392	0.005	0	20	CR812832.1
384	0	1.85793	0.175	0.006	0	20	drgx
385	0	1.78583	0.299	0.034	0	20	shox2
386	0	1.66557	0.368	0.013	0	20	lmx1bb
387	0	1.53885	0.29	0.005	0	20	tlx2
388	0	1.39407	0.541	0.107	0	20	meis2b
389	0	1.26834	0.222	0.007	0	20	tlx3b
390	2.66998e-299	1.07319	0.295	0.041	4.60251e-295	20	hoxa3a
391	1.35743e-285	1.29169	0.173	0.015	2.33993e-281	20	eya1
392	1.90695e-255	1.20897	0.538	0.149	3.28719e-251	20	mab21l2
393	3.8841e-229	1.40469	0.476	0.13	6.6954e-225	20	cbln1
394	2.64504e-190	1.34927	0.486	0.155	4.55952e-186	20	cbln2b
395	5.56311e-157	1.04436	0.283	0.065	9.58969e-153	20	raraa
396	7.04093e-79	0.976801	0.258	0.086	1.21372e-74	20	tfap2a
397	3.4934e-42	0.98942	0.216	0.091	6.02192e-38	20	tfap2b
398	1.47689e-40	1.11557	0.156	0.057	2.54587e-36	20	egr2b
399	1.26401e-35	2.34779	0.158	0.063	2.1789e-31	20	pyya
400	2.38816e-29	1.218	0.347	0.215	4.11671e-25	20	nrgna
401	0	3.15973	0.974	0.178	0	21	ptgdsb.1
402	0	3.14837	0.962	0.069	0	21	cx43
403	0	3.00946	0.978	0.187	0	21	ptgdsb.2
404	0	2.95617	1	0.564	0	21	fabp7a
405	0	2.88577	0.99	0.141	0	21	atp1a1b
406	0	2.87766	0.882	0.17	0	21	si:ch211-251b21.1
407	0	2.77559	0.981	0.251	0	21	slc1a2b
408	0	2.74309	0.978	0.121	0	21	atp1b4
409	0	2.73657	0.951	0.059	0	21	ptn
410	0	2.68298	0.928	0.072	0	21	mfge8a
411	0	2.61099	0.937	0.213	0	21	id1
412	0	2.60917	0.989	0.539	0	21	glula
413	0	2.55794	0.801	0.045	0	21	zgc:153704
414	0	2.55446	0.392	0.009	0	21	si:ch73-265d7.2
415	0	2.53689	0.362	0.009	0	21	cd81b
416	0	2.49437	0.919	0.085	0	21	s1pr1
417	0	2.48412	0.822	0.037	0	21	slc4a4a
418	0	2.4792	0.934	0.137	0	21	cebpd
419	0	2.4395	0.899	0.155	0	21	her4.3
420	0	2.41868	0.97	0.169	0	21	cd63
421	0	2.7219	0.272	0.03	0	22	penka
422	0	2.22458	0.394	0.025	0	22	gsx1
423	0	1.81984	0.388	0.007	0	22	hmx2
424	0	1.6493	0.419	0.035	0	22	isl1
425	0	1.62013	0.366	0.007	0	22	hmx3a
426	0	1.59915	0.382	0.052	0	22	dlx2a
427	0	1.30828	0.393	0.062	0	22	dlx5a
428	0	1.24943	0.263	0.021	0	22	nkx2.4a
429	0	1.14234	0.284	0.028	0	22	prox1a
430	1.70813e-291	1.22674	0.18	0.015	2.94448e-287	22	foxd2
431	1.06444e-254	1.17716	0.234	0.029	1.83488e-250	22	prox1b
432	5.51836e-127	3.45804	0.155	0.025	9.51255e-123	22	galn
433	2.33886e-122	1.22697	0.377	0.119	4.03172e-118	22	rgs5b
434	5.94062e-121	1.08692	0.279	0.071	1.02404e-116	22	rrad
435	8.70722e-101	2.03293	0.162	0.032	1.50095e-96	22	pdyn
436	6.04072e-70	0.921147	0.202	0.058	1.0413e-65	22	si:ch211-56a11.2
437	7.08265e-63	1.29564	0.169	0.047	1.22091e-58	22	tac1
438	6.4916e-52	0.998814	0.407	0.214	1.11902e-47	22	nrgna
439	4.20596e-16	0.949889	0.111	0.05	7.25024e-12	22	pmchl
440	4.17873e-06	0.939126	0.116	0.076	0.072033	22	zgc:114118
441	0	2.22151	0.84	0.207	0	23	nrgna
442	0	1.84828	0.415	0.058	0	23	pvalb7
443	0	1.65035	0.482	0.031	0	23	bnc2
444	0	1.61333	0.333	0.01	0	23	cntln
445	0	1.36844	0.378	0.047	0	23	ppp1r1c
446	0	1.36812	0.442	0.069	0	23	ccdc136b
447	0	1.34996	0.464	0.072	0	23	prkcbb
448	0	1.25844	0.333	0.034	0	23	shox2
449	0	1.24984	0.359	0.044	0	23	iqsec2b
450	0	1.22675	0.377	0.045	0	23	grm5a
451	5.34169e-293	1.92139	0.701	0.235	9.20801e-289	23	kctd4
452	5.19205e-261	1.6067	0.278	0.037	8.95006e-257	23	zgc:64022
453	1.86624e-257	1.25324	0.543	0.134	3.21702e-253	23	nr2f2
454	6.06586e-251	1.48689	0.85	0.47	1.04563e-246	23	hsbp1a
455	5.40017e-250	1.32908	0.414	0.082	9.30881e-246	23	syt5b
456	2.0752e-194	1.23311	0.701	0.287	3.57723e-190	23	si:dkey-35i13.1
457	4.3168e-174	1.39832	0.453	0.131	7.4413e-170	23	si:dkey-112a7.4
458	2.8658e-163	1.30221	0.354	0.085	4.94006e-159	23	tfap2a
459	7.87051e-146	1.61886	0.247	0.05	1.35672e-141	23	alcamb
460	2.13609e-135	1.21594	0.403	0.119	3.68219e-131	23	rgs5b
461	0	1.90141	0.107	0.001	0	24	ompa
462	0	1.63118	0.379	0.038	0	24	pax2a
463	0	1.29178	0.262	0.008	0	24	evx2
464	0	1.22674	0.219	0.005	0	24	c1ql4b
465	0	1.07059	0.2	0.007	0	24	pax5
466	0	0.866797	0.143	0.008	0	24	c1ql4a
467	8.13665e-288	1.64094	0.405	0.072	1.4026e-283	24	cpne4a
468	1.2715e-235	0.878501	0.135	0.01	2.19181e-231	24	slc18a3a
469	4.04125e-209	1.2062	0.183	0.02	6.96631e-205	24	slc5a7a
470	4.83486e-189	1.45932	0.31	0.059	8.33434e-185	24	en1b
471	5.17998e-174	1.19675	0.44	0.121	8.92924e-170	24	en2b
472	8.20642e-166	1.10656	0.48	0.142	1.41462e-161	24	lhx9
473	1.98058e-137	1.03943	0.426	0.132	3.41412e-133	24	arhgdig
474	9.31387e-114	1.00099	0.311	0.086	1.60552e-109	24	meis2a
475	2.68896e-99	0.929157	0.296	0.087	4.63524e-95	24	en2a
476	1.03625e-79	0.818315	0.663	0.363	1.78628e-75	24	adcyap1b
477	1.41242e-56	0.968339	0.223	0.079	2.43474e-52	24	aclya
478	7.94227e-54	0.919736	0.348	0.159	1.36909e-49	24	cbln2b
479	4.6805e-38	0.827579	0.321	0.164	8.06825e-34	24	pou3f1
480	2.90592e-13	0.824171	0.205	0.125	5.00922e-09	24	calb2a
481	0	2.95625	0.159	0.008	0	25	avp
482	0	2.52396	0.566	0.025	0	25	pdyn
483	0	2.34345	0.902	0.124	0	25	cbln1
484	0	2.26937	0.368	0.044	0	25	tac1
485	0	2.15999	0.914	0.232	0	25	kctd4
486	0	1.71097	0.371	0.014	0	25	six6b
487	0	1.67201	0.406	0.037	0	25	si:dkey-19b23.8
488	0	1.5451	0.495	0.07	0	25	zgc:114118
489	0	1.43171	0.469	0.04	0	25	sox1b
490	0	1.36759	0.262	0.011	0	25	six6a
491	0	1.32289	0.333	0.007	0	25	nr0b1
492	0	1.28459	0.325	0.022	0	25	fezf1
493	0	1.22123	0.503	0.081	0	25	syt5b
494	0	1.18834	0.352	0.04	0	25	sox14
495	3.36778e-251	1.68619	0.823	0.36	5.80538e-247	25	adcyap1b
496	5.09196e-232	1.09789	0.833	0.329	8.77752e-228	25	islr2
497	1.72628e-224	1.10905	0.723	0.238	2.97575e-220	25	nell2b
498	4.64035e-223	1.15179	0.378	0.07	7.99904e-219	25	rrad
499	1.45487e-173	1.75791	0.142	0.014	2.50791e-169	25	tac3b
500	2.89493e-128	1.18133	0.44	0.139	4.99028e-124	25	mpped2a
501	0	3.10713	0.848	0.03	0	26	pitx2
502	0	2.25438	0.784	0.079	0	26	bhlhe22
503	0	2.12757	0.74	0.08	0	26	neurod6a
504	0	1.49753	0.29	0.009	0	26	foxa1
505	5.59103e-248	1.52999	0.329	0.046	9.63782e-244	26	bhlhe23
506	7.77848e-241	1.24227	0.332	0.048	1.34085e-236	26	prdm8b
507	6.53717e-223	1.5386	0.183	0.016	1.12688e-218	26	rtn4rl2b
508	3.27792e-201	1.01243	0.285	0.041	5.65047e-197	26	neurod2
509	3.1424e-177	1.01965	0.438	0.099	5.41687e-173	26	neurod6b
510	1.65498e-171	0.891015	0.174	0.019	2.85285e-167	26	serpine1
511	2.76591e-164	1.59972	0.411	0.102	4.76788e-160	26	mpped2
512	7.02859e-121	0.965834	0.492	0.164	1.21159e-116	26	dusp5
513	5.52205e-111	1.10199	0.341	0.092	9.51892e-107	26	znf536
514	4.09166e-96	1.04018	0.32	0.09	7.05321e-92	26	zbtb18
515	2.22742e-93	0.959935	0.162	0.028	3.83963e-89	26	prkcda
516	2.64845e-89	0.918726	0.559	0.252	4.5654e-85	26	r3hdm1
517	9.50186e-79	0.928913	0.263	0.073	1.63793e-74	26	irx1a
518	2.86921e-76	1.12093	0.281	0.083	4.94595e-72	26	rtn4rl2a
519	4.05124e-66	0.966507	0.435	0.192	6.98353e-62	26	trim9
520	3.09605e-41	0.864595	0.213	0.077	5.33698e-37	26	zgc:162730
521	0	3.49544	0.905	0.015	0	27	hoxb5a
522	0	3.39462	0.882	0.016	0	27	hoxb5b
523	0	2.26894	0.748	0.036	0	27	hoxa3a
524	0	2.00359	0.31	0.002	0	27	hoxb6a
525	0	1.75302	0.264	0.002	0	27	hoxb6b
526	0	1.73663	0.435	0.005	0	27	hoxc5a
527	0	1.40403	0.118	0.002	0	27	hoxb8a
528	0	1.34742	0.26	0.015	0	27	hoxd4a
529	0	1.345	0.273	0.006	0	27	hoxc3a
530	3.48803e-296	1.11399	0.304	0.033	6.01266e-292	27	hoxb3a
531	5.3523e-237	1.45453	0.598	0.151	9.22629e-233	27	mab21l2
532	6.60057e-171	0.945044	0.221	0.029	1.13781e-166	27	tmie
533	1.23532e-137	0.759005	0.145	0.016	2.12945e-133	27	hoxd3a
534	5.33378e-81	0.713538	0.356	0.113	9.19438e-77	27	meis2b
535	4.31138e-77	0.855398	0.214	0.051	7.43196e-73	27	znf513a
536	3.27717e-69	0.813139	0.406	0.159	5.64918e-65	27	meis1b
537	3.50879e-69	0.807278	0.687	0.398	6.04845e-65	27	si:dkey-7j14.5
538	2.92526e-51	0.912169	0.118	0.024	5.04256e-47	27	gbx1
539	2.9611e-46	0.727306	0.305	0.124	5.10435e-42	27	si:dkey-56f14.4
540	1.31342e-35	0.686851	0.269	0.116	2.26408e-31	27	vamp1
541	0	4.19607	0.462	0.02	0	28	si:dkey-183j2.10
542	0	2.64069	0.601	0.081	0	28	hspb1
543	0	2.57704	0.709	0.176	0	28	si:ch211-251b21.1
544	0	2.14182	0.285	0.024	0	28	prss35
545	0	2.09304	0.805	0.205	0	28	mdka
546	0	2.00208	0.363	0.038	0	28	s100b
547	0	1.79158	0.546	0.009	0	28	BX469902.1
548	0	1.64811	0.666	0.096	0	28	socs3b
549	0	1.64504	0.512	0.011	0	28	msx3
550	0	1.62899	0.664	0.145	0	28	her6
551	0	1.54744	0.581	0.056	0	28	clybl
552	0	1.43939	0.305	0.002	0	28	atoh1c
553	1.18697e-297	1.60806	0.405	0.058	2.0461e-293	28	si:ch211-66e2.5
554	3.4757e-282	1.38875	0.474	0.08	5.99141e-278	28	spry2
555	5.85891e-263	1.63335	0.463	0.083	1.00996e-258	28	rrm2
556	2.59365e-238	2.18459	0.863	0.356	4.47093e-234	28	hmgb2a
557	1.98717e-175	1.73548	0.939	0.567	3.42548e-171	28	fabp7a
558	7.12355e-164	1.40637	0.89	0.539	1.22796e-159	28	hmga1a
559	8.11401e-152	1.39396	0.331	0.068	1.39869e-147	28	kctd12.2
560	7.97098e-120	1.39423	0.37	0.097	1.37404e-115	28	s1pr1
561	0	3.0969	1	0.355	0	29	hmgb2a
562	0	2.8256	0.969	0.027	0	29	nusap1
563	0	2.72591	0.84	0.018	0	29	si:ch211-69g19.2
564	0	2.66158	0.915	0.028	0	29	ube2c
565	0	2.64549	0.929	0.082	0	29	tuba8l
566	0	2.56003	0.793	0.018	0	29	kpna2
567	0	2.51916	0.909	0.029	0	29	cdk1
568	0	2.18618	0.79	0.015	0	29	aspm
569	0	2.17322	0.911	0.035	0	29	ccna2
570	0	2.09894	0.848	0.033	0	29	mki67
571	0	2.08566	0.813	0.011	0	29	kif11
572	0	2.068	0.813	0.024	0	29	top2a
573	0	2.06652	0.397	0.016	0	29	hes2.2
574	0	2.05495	1	0.538	0	29	hmga1a
575	0	2.04335	0.853	0.028	0	29	mad2l1
576	0	1.97475	0.837	0.078	0	29	dla
577	0	1.96313	0.766	0.018	0	29	cdc20
578	0	1.95368	0.897	0.081	0	29	lbr
579	0	1.93409	1	0.642	0	29	hmgb2b
580	0	1.91759	0.73	0.013	0	29	cenpf
581	0	2.55078	0.578	0.023	0	30	rprml
582	0	1.97806	0.628	0.08	0	30	syt5b
583	0	1.97081	0.491	0.033	0	30	si:dkey-1h6.8
584	0	1.57187	0.266	0.024	0	30	fezf1
585	4.27865e-275	1.847	0.683	0.184	7.37554e-271	30	rasd1
586	1.20076e-270	1.75676	0.871	0.361	2.06987e-266	30	adcyap1b
587	1.7018e-243	1.42624	0.321	0.044	2.93357e-239	30	CABZ01041913.1
588	4.33955e-241	1.41732	0.4	0.067	7.48051e-237	30	kctd12.2
589	1.23602e-226	1.6456	0.435	0.086	2.13064e-222	30	gadd45bb
590	2.07365e-222	1.48929	0.483	0.107	3.57456e-218	30	FP085414.1
591	1.58089e-211	1.77102	0.781	0.322	2.72515e-207	30	tmsb1
592	3.53909e-204	1.21577	0.713	0.236	6.10068e-200	30	kctd4
593	8.96404e-203	1.25542	0.25	0.031	1.54522e-198	30	pdyn
594	1.72361e-195	1.27186	0.472	0.108	2.97115e-191	30	cpne2
595	2.20042e-179	1.3412	0.469	0.117	3.79308e-175	30	psd3l
596	1.92402e-172	1.26266	0.671	0.253	3.31663e-168	30	ndrg3b
597	3.92665e-150	1.20437	0.559	0.177	6.76876e-146	30	ngb
598	6.19844e-124	1.16324	0.43	0.125	1.06849e-119	30	bdnf
599	2.58972e-94	1.25778	0.402	0.137	4.46416e-90	30	plk2b
600	4.23816e-85	3.60028	0.246	0.063	7.30574e-81	30	pyya
601	0	3.19356	0.919	0.07	0	31	atf5b
602	0	2.40182	0.549	0.023	0	31	cebpa
603	0	2.0004	0.717	0.168	0	31	ddit3
604	0	1.78706	0.464	0.047	0	31	cebpb
605	2.32292e-225	0.976696	0.146	0.009	4.00424e-221	31	atf5a
606	3.15691e-114	1.68121	0.34	0.087	5.44188e-110	31	pou4f2
607	5.05317e-94	1.47683	0.35	0.107	8.71065e-90	31	gadd45ga
608	1.87073e-78	1.0331	0.401	0.144	3.22476e-74	31	lhx9
609	1.22029e-69	1.03239	0.312	0.1	2.10354e-65	31	barhl2
610	1.81312e-64	0.927619	0.24	0.067	3.12546e-60	31	pou4f1
611	1.55034e-59	0.999649	0.495	0.272	2.67248e-55	31	irf2bp2b
612	2.70897e-59	0.976461	0.225	0.065	4.66973e-55	31	crabp1a
613	5.63984e-58	0.927189	0.35	0.139	9.72195e-54	31	cadm1b
614	4.89916e-55	1.23649	0.316	0.127	8.44517e-51	31	trib3
615	6.82937e-52	0.965982	0.354	0.154	1.17725e-47	31	camta1b
616	2.84922e-44	0.934782	0.188	0.059	4.91148e-40	31	pcdh18a
617	6.45493e-44	0.888017	0.354	0.165	1.1127e-39	31	trim13
618	1.76338e-39	0.904685	0.266	0.11	3.03972e-35	31	CABZ01102109.1
619	1.88082e-37	0.989195	0.118	0.03	3.24215e-33	31	nupr1
620	9.01256e-37	0.930377	0.5	0.315	1.55358e-32	31	lmo3
621	0	2.86334	0.691	0.004	0	32	lhx6
622	0	2.83967	0.481	0.004	0	32	lhx8a
623	0	1.69899	0.556	0.062	0	32	dlx5a
624	0	1.28202	0.243	0.014	0	32	nkx2.1
625	1.42859e-229	1.70702	0.236	0.023	2.4626e-225	32	gbx1
626	1.69837e-196	1.11483	0.227	0.024	2.92765e-192	32	dlx6a
627	1.35541e-154	1.17182	0.316	0.055	2.33646e-150	32	dlx2a
628	9.97526e-153	1.13434	0.773	0.305	1.71953e-148	32	slc6a1b
629	5.69573e-125	0.926152	0.692	0.261	9.8183e-121	32	gad2
630	3.23287e-124	0.931783	0.656	0.237	5.57283e-120	32	gad1b
631	6.20434e-123	1.0638	0.245	0.042	1.0695e-118	32	foxg1a
632	5.19707e-119	1.09909	0.227	0.038	8.95872e-115	32	sp9
633	2.13407e-82	0.959766	0.154	0.025	3.67871e-78	32	vax1
634	3.00346e-80	1.26754	0.367	0.12	5.17737e-76	32	necab1
635	7.18421e-64	0.926931	0.372	0.138	1.23841e-59	32	plk2b
636	6.01822e-53	1.32641	0.182	0.047	1.03742e-48	32	calb1
637	3.55306e-51	0.958536	0.255	0.084	6.12476e-47	32	cygb2
638	3.08967e-35	1.08276	0.142	0.04	5.32598e-31	32	six3b
639	4.43539e-33	1.38738	0.133	0.038	7.64572e-29	32	crhbp
640	8.41356e-21	2.05538	0.168	0.071	1.45033e-16	32	sst1.1
641	0	2.70722	0.979	0.174	0	33	neurod1
642	0	2.32882	0.762	0.082	0	33	zic5
643	0	2.03113	0.934	0.167	0	33	zic2a
644	0	1.93791	0.436	0.02	0	33	oprd1b
645	0	1.85875	0.652	0.086	0	33	zbtb18
646	0	1.83297	0.41	0.018	0	33	pax6b
647	0	1.75961	0.635	0.092	0	33	bcam
648	0	1.68052	0.493	0.066	0	33	zic4
649	0	1.53671	0.59	0.104	0	33	nfia
650	0	1.49488	0.475	0.041	0	33	nebl
651	0	1.47012	0.392	0.039	0	33	pax6a
652	0	1.4299	0.348	0.015	0	33	cerkl
653	7.10946e-302	1.45981	0.598	0.109	1.22553e-297	33	zic1
654	1.79249e-269	1.93728	0.706	0.19	3.0899e-265	33	ccng1
655	4.56375e-268	1.46162	0.489	0.085	7.86698e-264	33	ppp1r14bb
656	1.56522e-246	1.43845	0.441	0.073	2.69813e-242	33	mapk11
657	9.01967e-216	1.48031	0.661	0.191	1.55481e-211	33	cxxc5a
658	7.5488e-196	1.38707	0.454	0.097	1.30126e-191	33	chd7
659	4.7368e-182	1.47712	0.351	0.06	8.16529e-178	33	en1b
660	1.29106e-171	1.42603	0.782	0.359	2.22553e-167	33	hnrnpa0a
661	0	4.63045	0.591	0.02	0	34	aldoca
662	0	3.32061	0.57	0.059	0	34	pvalb7
663	0	3.08518	0.681	0.04	0	34	pcp4l1
664	0	3.06759	0.629	0.035	0	34	pbxip1b
665	0	2.75602	0.589	0.022	0	34	ca8
666	0	2.31675	0.552	0.03	0	34	grm1a
667	0	2.20719	0.432	0.002	0	34	casq2
668	0	2.17445	0.484	0.011	0	34	itpr1b
669	0	2.04046	0.531	0.033	0	34	dazap1
670	0	2.0086	0.904	0.195	0	34	foxp4
671	0	1.93425	0.589	0.056	0	34	mpped1
672	0	1.88387	0.49	0.011	0	34	skor1b
673	0	1.81909	0.426	0.013	0	34	plxdc1
674	0	1.71842	0.417	0.023	0	34	ppp1r1b
675	0	1.58185	0.629	0.109	0	34	roraa
676	3.7067e-250	2.05493	0.4	0.056	6.3896e-246	34	CR361551.1
677	1.59405e-155	1.79071	0.582	0.187	2.74782e-151	34	hpca
678	1.31999e-153	1.5631	0.315	0.054	2.2754e-149	34	rgs3a
679	6.94725e-149	1.83087	0.683	0.29	1.19757e-144	34	si:dkey-35i13.1
680	3.24373e-119	1.59923	0.448	0.135	5.59154e-115	34	PCP4L1
681	0	4.74062	0.985	0.01	0	35	gng8
682	0	3.48422	0.434	0.019	0	35	tac3a
683	0	3.04369	0.842	0.09	0	35	kctd12.1
684	0	2.97285	0.438	0.01	0	35	g0s2
685	0	2.83723	0.81	0.072	0	35	si:dkeyp-72h1.1
686	0	2.81521	0.577	0.008	0	35	zgc:101731
687	0	2.798	0.669	0.04	0	35	nwd2
688	0	2.5968	0.848	0.061	0	35	pou4f1
689	0	2.50424	0.701	0.016	0	35	synpr
690	0	2.28775	0.382	0.006	0	35	tgfbi
691	0	2.24292	0.562	0.002	0	35	si:ch1073-90m23.1
692	0	2.04216	0.594	0.032	0	35	bean1
693	0	2.00592	0.626	0.07	0	35	zgc:162707
694	0	1.99817	0.553	0.024	0	35	cadps2
695	0	1.92794	0.521	0.021	0	35	irx1b
696	0	1.91069	0.915	0.212	0	35	zic3
697	0	1.8704	0.286	0	0	35	cngb3.1
698	0	1.85835	0.442	0.021	0	35	syt6b
699	0	1.84587	0.316	0.023	0	35	ppp1r14ab
700	1.41125e-255	2.80559	0.462	0.069	2.43271e-251	35	sst1.1
701	0	3.10553	0.927	0.026	0	36	tbr1b
702	1.58503e-192	1.38781	0.336	0.042	2.73228e-188	36	foxg1a
703	1.11554e-114	2.67977	0.246	0.037	1.92296e-110	36	crhbp
704	3.65849e-80	0.928054	0.18	0.027	6.3065e-76	36	grm2a
705	8.93197e-73	1.10211	0.398	0.12	1.53969e-68	36	necab1
706	1.11166e-63	1.09733	0.505	0.204	1.91627e-59	36	zfhx4
707	4.00785e-62	1.1305	0.427	0.153	6.90873e-58	36	plcxd3
708	1.39418e-58	1.02519	0.391	0.132	2.40329e-54	36	lhx1a
709	2.76952e-56	0.950289	0.277	0.076	4.7741e-52	36	lhx5
710	1.95767e-50	0.794196	0.758	0.492	3.37464e-46	36	scg2b
711	2.14939e-46	0.882201	0.175	0.039	3.70512e-42	36	eomesa
712	1.96838e-42	1.33695	0.346	0.135	3.3931e-38	36	cbln1
713	6.4055e-41	0.739944	0.55	0.284	1.10418e-36	36	c1qtnf4
714	6.63946e-40	0.7847	0.31	0.112	1.14451e-35	36	cpne2
715	1.42748e-33	0.77165	0.277	0.102	2.46068e-29	36	barhl2
716	1.5999e-33	0.996898	0.277	0.106	2.75791e-29	36	rtn4r
717	1.76708e-30	0.790477	0.175	0.052	3.0461e-26	36	arpp21
718	1.11697e-24	0.942035	0.277	0.123	1.92543e-20	36	rgs5b
719	5.91063e-23	0.82228	0.355	0.19	1.01887e-18	36	msi2b
720	2.6474e-12	0.759383	0.185	0.092	4.56359e-08	36	tp53i11b
721	0	3.57135	0.75	0.018	0	37	AL845362.1
722	0	2.22404	0.444	0.021	0	37	crabp1b
723	0	1.901	0.699	0.099	0	37	socs3b
724	0	1.87213	0.51	0.023	0	37	prss35
725	0	1.72905	0.417	0.021	0	37	gsx2
726	0	1.70535	0.845	0.163	0	37	her4.3
727	0	1.63133	0.59	0.068	0	37	sb:cb81
728	1.61977e-289	1.93485	0.954	0.263	2.79217e-285	37	her15.1
729	3.16707e-281	1.98814	0.947	0.282	5.4594e-277	37	her15.2
730	6.14985e-279	1.8691	0.905	0.234	1.06011e-274	37	her4.4
731	1.10685e-250	2.43262	0.631	0.115	1.908e-246	37	abhd6a
732	6.49679e-230	1.95251	0.915	0.324	1.11992e-225	37	her4.1
733	3.79105e-225	1.96167	0.937	0.359	6.53501e-221	37	her4.2
734	8.11247e-221	1.76475	0.733	0.178	1.39843e-216	37	si:ch211-251b21.1
735	1.27365e-217	1.69693	0.791	0.208	2.19552e-213	37	mdka
736	2.10682e-202	1.94101	0.585	0.116	3.63173e-198	37	her12
737	2.27877e-179	1.62359	0.388	0.057	3.92815e-175	37	si:ch73-21g5.7
738	3.0559e-172	1.55752	0.626	0.148	5.26776e-168	37	her6
739	4.59284e-143	1.60925	0.575	0.149	7.91713e-139	37	cebpd
740	2.04063e-139	1.70938	0.937	0.569	3.51763e-135	37	fabp7a
741	0	2.69034	0.602	0.019	0	38	emx3
742	0	2.6435	0.823	0.033	0	38	eomesa
743	0	2.15613	0.571	0.033	0	38	rprma
744	0	1.97749	0.442	0.015	0	38	stxbp1b
745	0	1.94985	0.488	0.03	0	38	tbr1b
746	0	1.22664	0.157	0.001	0	38	si:ch211-114l13.12
747	5.53404e-266	1.93189	0.884	0.251	9.53957e-262	38	r3hdm1
748	2.17555e-166	1.29607	0.985	0.646	3.75022e-162	38	elavl4
749	8.40384e-156	1.45331	0.296	0.037	1.44865e-151	38	si:dkey-1h6.8
750	5.42138e-146	1.3436	0.933	0.56	9.34538e-142	38	camk2n1a
751	1.75489e-143	1.17648	0.247	0.028	3.02508e-139	38	si:dkey-22o12.2
752	2.94004e-143	1.38313	0.393	0.07	5.06804e-139	38	efnb2a
753	1.9814e-136	1.30545	0.308	0.045	3.41554e-132	38	ccl44
754	5.12857e-120	1.26357	0.409	0.083	8.84064e-116	38	rtn4rl2a
755	4.08524e-111	1.54503	0.769	0.385	7.04214e-107	38	calm2a
756	1.94275e-109	1.56084	0.429	0.101	3.34891e-105	38	neurod6b
757	2.24959e-108	1.27072	0.27	0.043	3.87785e-104	38	sipa1l2
758	6.02338e-99	1.16654	0.805	0.411	1.03831e-94	38	syt1a
759	7.1404e-87	1.505	0.455	0.134	1.23086e-82	38	cbln1
760	6.49432e-71	1.15807	0.519	0.189	1.11949e-66	38	rasd1
761	0	4.2832	0.992	0.048	0	39	prdx1
762	0	3.80114	0.366	0.005	0	39	si:ch211-131k2.2
763	0	3.79911	0.709	0.055	0	39	si:ch211-56a11.2
764	0	3.17986	0.501	0.022	0	39	rasd3
765	0	3.12539	0.639	0.014	0	39	scgn
766	0	2.85156	0.569	0.051	0	39	txn
767	0	2.28267	0.351	0.002	0	39	th2
768	0	2.23597	0.457	0.019	0	39	chgb
769	0	2.21339	0.252	0.003	0	39	FQ378016.1
770	0	2.0969	0.582	0.034	0	39	ak5l
771	0	2.00731	0.226	0.007	0	39	ndufa4l2a
772	0	1.95004	0.758	0.124	0	39	hpcal4
773	0	1.93987	0.387	0.013	0	39	c2cd4a
774	0	1.91098	0.265	0.004	0	39	tph1a
775	0	1.83382	0.216	0.001	0	39	atp1b2b
776	7.77026e-274	2.17904	0.605	0.098	1.33944e-269	39	txnrd3
777	6.50071e-214	1.93982	0.79	0.225	1.12059e-209	39	scg3
778	1.72955e-210	1.93632	0.356	0.04	2.9814e-206	39	ccka
779	1.04399e-197	1.9826	0.53	0.096	1.79962e-193	39	insm1b
780	1.47872e-97	1.81292	0.556	0.178	2.54902e-93	39	mt2
781	0	5.79592	0.74	0.06	0	40	plp1b
782	0	5.76014	0.683	0.096	0	40	cd59
783	0	4.76898	0.586	0.015	0	40	mpz
784	0	4.64809	0.623	0.065	0	40	mbpa
785	0	4.51395	0.671	0.014	0	40	cldnk
786	0	4.23318	0.669	0.031	0	40	flj13639
787	0	4.1128	0.957	0.029	0	40	si:ch211-286c4.6
788	0	3.61203	0.96	0.096	0	40	cd82a
789	0	3.52914	0.5	0.012	0	40	cd9b
790	0	3.49439	0.774	0.007	0	40	si:ch73-335m24.2
791	0	3.42623	0.757	0.019	0	40	tuba8l3
792	0	3.40877	0.503	0.001	0	40	si:dkey-200l5.4
793	0	3.3138	0.78	0.004	0	40	timd4
794	0	3.19788	0.549	0.04	0	40	crip3
795	0	3.00981	0.694	0.014	0	40	elovl1b
796	0	2.96829	0.469	0.003	0	40	csrp1b
797	0	2.80632	0.923	0.017	0	40	si:ch211-132g1.3
798	0	2.68371	0.763	0.003	0	40	ninj2
799	0	2.63889	0.446	0.003	0	40	cdaa
800	7.87845e-286	2.96625	0.726	0.126	1.35809e-281	40	mbpb
801	0	2.73653	0.75	0.017	0	41	prph
802	0	2.65385	0.626	0.014	0	41	phox2a
803	0	2.44084	0.656	0.018	0	41	slc5a7a
804	0	2.37063	0.715	0.065	0	41	plscr3b
805	0	2.21805	0.591	0.007	0	41	slc18a3a
806	0	2.07336	0.688	0.03	0	41	phox2bb
807	0	1.93178	0.479	0.028	0	41	anxa13l
808	0	1.88065	0.394	0.005	0	41	chata
809	0	1.84152	0.321	0.002	0	41	isl2a
810	0	1.80264	0.515	0.046	0	41	tac1
811	0	1.69385	0.432	0.016	0	41	neflb
812	0	1.68574	0.344	0.013	0	41	nkx6.1
813	0	1.64994	0.338	0.006	0	41	lhx4
814	0	1.60383	0.388	0.012	0	41	slit3
815	0	1.60159	0.279	0.005	0	41	calca
816	0	1.59859	0.459	0.039	0	41	isl1
817	8.55093e-216	1.76909	0.176	0.009	1.47401e-211	41	vip
818	2.49091e-172	1.50453	0.379	0.05	4.29384e-168	41	tagln3b
819	5.27221e-171	1.57229	0.676	0.153	9.08824e-167	41	mab21l2
820	2.87808e-151	1.53347	0.556	0.115	4.96124e-147	41	vamp1
821	0	3.72129	0.931	0.006	0	42	aplnra
822	0	3.68716	0.931	0.031	0	42	olig2
823	0	3.66011	1	0.029	0	42	si:ch211-286c4.6
824	0	3.34806	0.896	0.006	0	42	olig1
825	0	3.34458	0.884	0.004	0	42	aplnrb
826	0	3.25329	0.95	0.017	0	42	si:ch211-132g1.3
827	0	2.92714	0.881	0.011	0	42	si:busm1-57f23.1
828	0	2.89339	0.925	0.033	0	42	sema5a
829	0	2.87773	0.947	0.094	0	42	traf4a
830	0	2.66675	0.906	0.067	0	42	cxcl12a
831	0	2.61815	0.805	0.013	0	42	sox10
832	0	2.57185	0.928	0.097	0	42	cd82a
833	0	2.35158	0.865	0.108	0	42	rassf2a
834	0	2.32564	0.972	0.234	0	42	tmem178b
835	0	2.24727	0.764	0.04	0	42	rgcc
836	0	2.22159	0.774	0.06	0	42	igsf9ba
837	0	2.19789	0.805	0.046	0	42	syt9b
838	0	2.14424	0.94	0.179	0	42	cd63
839	0	2.13571	0.679	0.022	0	42	bcan
840	0	2.04586	0.601	0.007	0	42	zcchc24
841	0	2.94524	0.929	0.121	0	43	calb2a
842	0	2.23297	0.532	0.041	0	43	si:dkey-183i3.9
843	0	1.27674	0.101	0.001	0	43	CU571382.1
844	3.80489e-216	1.93495	0.63	0.101	6.55888e-212	43	neurod6b
845	1.42926e-138	1.36072	0.396	0.058	2.46377e-134	43	scrt1b
846	5.20963e-137	1.35678	0.312	0.037	8.98036e-133	43	shox2
847	3.64239e-120	1.49047	0.318	0.044	6.27875e-116	43	calb2b
848	2.22145e-119	1.32948	0.464	0.087	3.82934e-115	43	neurod6a
849	3.05118e-105	1.49874	0.399	0.077	5.25962e-101	43	BX569787.1
850	7.11438e-105	1.43164	0.549	0.138	1.22638e-100	43	nr2f2
851	4.5688e-104	1.18357	0.929	0.511	7.8757e-100	43	pcp4a
852	1.01157e-68	1.44153	0.549	0.198	1.74374e-64	43	tcf7l2
853	2.48632e-60	0.945619	0.571	0.208	4.28593e-56	43	oip5-as1
854	1.11512e-54	0.981368	0.494	0.167	1.92224e-50	43	bcl11ba
855	2.2953e-51	0.913855	0.331	0.088	3.95663e-47	43	necab2
856	4.73813e-48	0.995832	0.295	0.076	8.16759e-44	43	cpne4a
857	1.71758e-43	0.919783	0.205	0.043	2.96076e-39	43	ncs1a
858	2.52485e-33	1.0732	0.558	0.292	4.35234e-29	43	si:dkey-35i13.1
859	3.95333e-29	0.91573	0.39	0.16	6.81475e-25	43	cbln2b
860	1.25952e-19	1.03416	0.26	0.109	2.17116e-15	43	nfia
861	0	2.92811	0.535	0.024	0	44	CR936442.1
862	0	2.7048	0.933	0.084	0	44	neurod6a
863	0	2.66358	0.599	0.004	0	44	nme2a
864	0	2.31344	0.954	0.121	0	44	calb2a
865	0	2.27328	0.806	0.1	0	44	neurod6b
866	0	2.25295	0.729	0.06	0	44	pvalb7
867	0	2.06246	0.813	0.085	0	44	bhlhe22
868	0	1.93224	0.599	0.037	0	44	gabra4
869	0	1.93209	0.63	0.043	0	44	nebl
870	0	1.69525	0.454	0.025	0	44	ppp1r1b
871	0	1.63082	0.599	0.039	0	44	pitx2
872	0	1.52309	0.415	0.028	0	44	zgc:92107
873	8.82344e-296	1.72683	0.535	0.05	1.52098e-291	44	ppp1r1c
874	4.50471e-246	1.5032	0.225	0.01	7.76522e-242	44	pde6ha
875	9.35401e-204	1.51992	0.408	0.042	1.61244e-199	44	zgc:171482
876	5.2195e-202	2.71994	1	0.51	8.99737e-198	44	pcp4a
877	4.51513e-187	1.86319	0.806	0.188	7.78319e-183	44	rasd1
878	6.92246e-185	1.55015	0.817	0.187	1.19329e-180	44	rbfox3a
879	2.30922e-131	1.61298	0.56	0.118	3.98064e-127	44	mgll
880	1.97729e-79	1.7695	0.391	0.087	3.40846e-75	44	hspb1
881	0	2.52089	0.943	0.164	0	45	dusp5
882	0	2.4606	0.739	0.047	0	45	fxyd1
883	0	2.31455	0.767	0.022	0	45	galn
884	0	2.27843	0.975	0.179	0	45	neurod1
885	0	2.14088	0.519	0.003	0	45	krt5
886	0	2.10503	0.544	0.027	0	45	crlf3
887	0	2.05267	0.671	0.043	0	45	nebl
888	0	1.81956	0.466	0.025	0	45	kcnj19b
889	0	1.66735	0.399	0.011	0	45	fat2
890	7.6314e-302	1.93169	0.951	0.172	1.3155e-297	45	zic2a
891	9.61841e-293	1.82238	0.721	0.093	1.65802e-288	45	cspg5b
892	2.97507e-284	2.26607	0.926	0.192	5.12843e-280	45	lmo4b
893	1.47336e-259	1.64845	0.664	0.087	2.53978e-255	45	zic5
894	3.20623e-246	2.08938	0.936	0.231	5.52689e-242	45	qkia
895	1.58798e-219	1.57175	0.488	0.056	2.73735e-215	45	sept9b
896	1.21407e-217	1.81619	0.71	0.126	2.09281e-213	45	hpcal4
897	9.23728e-184	2.04286	1	0.509	1.59232e-179	45	snap25b
898	3.58211e-170	1.82817	0.936	0.371	6.17484e-166	45	sypb
899	1.18641e-159	1.59002	0.996	0.698	2.04513e-155	45	sncb
900	7.87718e-143	1.52767	0.721	0.179	1.35787e-138	45	ngb
901	0	3.66017	0.993	0.083	0	46	mfge8a
902	0	3.63844	0.996	0.134	0	46	zgc:165461
903	0	3.50855	0.957	0.081	0	46	cx43
904	0	3.29361	0.996	0.152	0	46	atp1a1b
905	0	3.19556	0.978	0.036	0	46	aqp1a.1
906	0	3.09194	1	0.133	0	46	atp1b4
907	0	2.94165	0.996	0.095	0	46	s1pr1
908	0	2.87688	0.967	0.189	0	46	ptgdsb.1
909	0	2.86373	0.975	0.197	0	46	ptgdsb.2
910	0	2.80689	0.996	0.124	0	46	efhd1
911	0	2.75033	0.996	0.208	0	46	mdka
912	0	2.5716	0.804	0.035	0	46	hspb15
913	0	2.56796	0.989	0.179	0	46	cd63
914	0	2.53291	0.837	0.02	0	46	robo4
915	0	2.52553	0.902	0.071	0	46	ptn
916	2.92159e-295	3.40901	1	0.26	5.03624e-291	46	slc1a2b
917	1.36602e-289	2.59948	0.986	0.223	2.35475e-285	46	id1
918	3.94204e-212	2.43	0.826	0.177	6.79529e-208	46	mt2
919	5.14469e-191	3.24854	1	0.545	8.86842e-187	46	glula
920	6.88275e-182	2.75387	1	0.569	1.18645e-177	46	fabp7a
921	0	1.96872	0.358	0.01	0	47	sp5l
922	0	1.28938	0.238	0.007	0	47	notum1b
923	4.32048e-228	1.98972	0.708	0.101	7.44765e-224	47	neurod6b
924	8.02768e-192	1.67328	0.3	0.021	1.38381e-187	47	gsg1l
925	1.0348e-105	0.996135	0.171	0.012	1.78378e-101	47	fam212aa
926	1.52281e-93	2.05003	0.5	0.112	2.62502e-89	47	id2b
927	9.92929e-84	1.4267	0.375	0.066	1.71161e-79	47	barhl1a
928	4.85253e-75	1.18906	0.233	0.03	8.36479e-71	47	sp5a
929	1.19607e-66	1.01804	0.408	0.088	2.06179e-62	47	neurod6a
930	7.11433e-66	1.09558	0.238	0.035	1.22637e-61	47	zfpm2b
931	9.37989e-65	1.27993	0.267	0.044	1.61691e-60	47	neurod2
932	2.16034e-59	1.6542	0.65	0.281	3.72399e-55	47	lin7a
933	2.20782e-54	1.01429	0.375	0.089	3.80584e-50	47	pou4f2
934	9.25394e-49	1.29541	0.279	0.06	1.59519e-44	47	sox6
935	1.00887e-47	1.31056	0.354	0.094	1.73909e-43	47	znf536
936	3.08721e-47	1.16817	0.538	0.203	5.32174e-43	47	olfm2a
937	1.71213e-43	1.13272	0.392	0.118	2.95138e-39	47	pcdh11
938	4.06244e-43	1.04205	0.154	0.022	7.00283e-39	47	slc5a7a
939	1.63424e-30	1.43104	0.133	0.023	2.8171e-26	47	crhb
940	9.14675e-10	1.30844	0.179	0.081	1.57672e-05	47	aclya
941	0	3.76114	0.651	0.024	0	48	rbp4
942	0	3.2614	0.399	0.008	0	48	soul5
943	0	3.24514	0.685	0.048	0	48	fxyd1
944	0	3.20677	0.63	0.016	0	48	serpinh1b
945	0	3.13052	0.567	0.009	0	48	bhmt
946	0	3.06689	0.408	0.02	0	48	wu:fj16a03
947	0	2.78126	0.462	0.007	0	48	zgc:158423
948	0	2.74626	0.752	0.075	0	48	zgc:162730
949	0	2.6903	0.756	0.014	0	48	pmp22a
950	0	2.68911	0.471	0.006	0	48	tfpia
951	0	2.67575	0.412	0.012	0	48	si:ch73-86n18.1
952	0	2.50836	0.504	0.027	0	48	aoc2
953	0	2.49337	0.773	0.045	0	48	sparc
954	2.11535e-298	2.547	0.542	0.046	3.64643e-294	48	lpl
955	1.55592e-267	2.47599	0.752	0.101	2.6821e-263	48	selenop
956	1.63658e-263	2.53067	0.891	0.154	2.82114e-259	48	sdc4
957	1.25297e-112	2.47381	0.395	0.058	2.15986e-108	48	zgc:153704
958	5.9254e-42	3.18576	0.361	0.111	1.02142e-37	48	ggctb
959	4.32959e-24	4.62372	0.567	0.326	7.46335e-20	48	epd
960	4.08051e-11	2.46535	0.172	0.069	7.03399e-07	48	mbpa
961	0	4.29577	0.876	0.004	0	49	tph2
962	0	3.76241	0.871	0.051	0	49	txn
963	0	3.53222	0.806	0.013	0	49	ddc
964	0	3.02306	0.731	0.002	0	49	fev
965	0	2.12628	0.468	0.026	0	49	gch1
966	0	1.52847	0.493	0.029	0	49	gata2a
967	6.53695e-231	1.67698	0.647	0.066	1.12684e-226	49	gata3
968	3.52294e-188	1.23464	0.308	0.019	6.07285e-184	49	lmx1bb
969	7.97174e-127	1.38014	0.303	0.027	1.37417e-122	49	rpp25b
970	5.4379e-110	1.22231	0.328	0.035	9.37385e-106	49	htr1d
971	2.04392e-106	1.35735	0.403	0.055	3.52331e-102	49	prdx1
972	5.61434e-81	1.38238	0.522	0.11	9.67799e-77	49	CABZ01102109.1
973	5.9794e-71	1.4448	0.438	0.088	1.03073e-66	49	qdpra
974	6.01323e-65	1.38947	0.925	0.511	1.03656e-60	49	snap25b
975	9.30926e-64	1.77214	0.428	0.095	1.60473e-59	49	gstp1
976	1.98263e-61	1.93073	0.244	0.034	3.41765e-57	49	penka
977	4.18415e-41	1.71266	0.284	0.063	7.21263e-37	49	en1b
978	6.36973e-32	1.17163	0.587	0.248	1.09801e-27	49	pbx1a
979	5.50208e-27	2.01393	0.363	0.125	9.48449e-23	49	calb2a
980	9.85239e-24	1.23496	0.264	0.078	1.69836e-19	49	msi2a
981	0	2.74658	0.842	0.036	0	50	dazap1
982	0	2.43481	0.814	0.048	0	50	syt9b
983	0	2.39196	0.552	0.006	0	50	smpx
984	0	2.09881	0.563	0.016	0	50	plxdc1
985	0	1.93049	0.519	0.013	0	50	lmo7a
986	0	1.91179	0.514	0.025	0	50	ppp1r1b
987	0	1.499	0.399	0.015	0	50	itpr1b
988	3.65191e-239	2.18179	0.492	0.036	6.29516e-235	50	rprma
989	1.98067e-237	2.16816	0.842	0.112	3.41429e-233	50	roraa
990	2.65448e-221	2.13977	0.514	0.042	4.5758e-217	50	cahz
991	4.17856e-153	1.75377	0.355	0.028	7.20301e-149	50	prkcda
992	4.46395e-141	1.59073	0.454	0.049	7.69496e-137	50	grm5a
993	1.1086e-104	1.70214	0.432	0.059	1.911e-100	50	sox6
994	5.19204e-104	2.06921	0.814	0.257	8.95004e-100	50	atp2b1a
995	3.69483e-103	1.53511	0.852	0.254	6.36915e-99	50	r3hdm1
996	2.01342e-92	1.4396	0.284	0.029	3.47074e-88	50	zdhhc2
997	1.26961e-90	2.07493	0.94	0.48	2.18855e-86	50	olfm1b
998	1.51332e-77	1.46106	0.421	0.074	2.60867e-73	50	rhocb
999	1.43925e-76	1.48583	0.94	0.593	2.48098e-72	50	ywhaz
1000	9.95214e-56	2.00279	0.454	0.112	1.71555e-51	50	id2b
1001	0	3.91793	0.873	0.016	0	51	nts
1002	0	3.18827	0.265	0.003	0	51	si:dkey-85n7.8
1003	0	1.67188	0.367	0.008	0	51	bsx
1004	2.0273e-291	1.53073	0.343	0.013	3.49466e-287	51	htr1ab
1005	1.23932e-166	1.86611	0.56	0.059	2.13635e-162	51	si:ch211-56a11.2
1006	1.71682e-142	1.17257	0.181	0.007	2.95945e-138	51	aoc1
1007	4.10323e-125	1.17936	0.211	0.011	7.07315e-121	51	cfap58
1008	1.73843e-98	1.73653	0.651	0.128	2.99671e-94	51	hpcal4
1009	1.82491e-88	1.45911	0.349	0.041	3.14578e-84	51	isl1
1010	3.07409e-76	1.48429	0.259	0.026	5.29911e-72	51	CR936442.1
1011	3.32169e-70	1.34696	0.301	0.038	5.72593e-66	51	dkk3a
1012	4.09992e-56	1.51715	0.319	0.053	7.06744e-52	51	alcamb
1013	6.92808e-50	1.19135	0.386	0.078	1.19426e-45	51	si:dkeyp-72h1.1
1014	2.93906e-46	1.24577	0.452	0.111	5.06635e-42	51	CABZ01102109.1
1015	2.12427e-41	1.14786	0.331	0.067	3.66182e-37	51	dlx5a
1016	1.00782e-38	1.41243	0.47	0.136	1.73728e-34	51	cbln1
1017	2.04231e-35	1.62884	0.361	0.095	3.52054e-31	51	gstp1
1018	1.66839e-34	1.16641	0.386	0.102	2.87596e-30	51	barhl2
1019	1.85553e-34	1.47421	0.518	0.181	3.19856e-30	51	chga
1020	1.30559e-31	1.33942	0.319	0.083	2.25057e-27	51	tcf12
1021	0	4.71856	0.485	0.017	0	52	sst1.2
1022	3.04466e-304	3.98588	0.785	0.07	5.24838e-300	52	sst1.1
1023	8.92281e-302	2.05721	0.693	0.05	1.53811e-297	52	six3a
1024	2.12126e-277	2.64678	0.399	0.018	3.65663e-273	52	nts
1025	2.45508e-242	1.32924	0.27	0.009	4.23207e-238	52	masp1
1026	2.41402e-171	1.91491	0.472	0.04	4.16128e-167	52	six3b
1027	4.2796e-167	3.31835	0.282	0.015	7.37717e-163	52	tac3b
1028	8.93585e-149	1.69819	0.276	0.016	1.54036e-144	52	nxph2b
1029	6.38122e-126	1.94727	0.319	0.025	1.1e-121	52	cart2
1030	9.45491e-96	1.78918	0.368	0.043	1.62984e-91	52	pax6a
1031	3.67395e-83	1.25832	0.896	0.265	6.33315e-79	52	gad2
1032	2.66194e-76	1.1564	0.405	0.059	4.58865e-72	52	si:dkey-175g6.2
1033	1.105e-74	1.32959	0.276	0.03	1.90481e-70	52	gata2a
1034	4.64544e-68	1.75487	0.27	0.031	8.00782e-64	52	penkb
1035	3.87352e-63	1.75842	0.521	0.119	6.67717e-59	52	tal1
1036	4.3925e-58	2.55412	0.282	0.04	7.57179e-54	52	npy
1037	6.14137e-54	1.75994	0.147	0.012	1.05865e-49	52	uts1
1038	2.10838e-53	1.51277	0.129	0.01	3.63443e-49	52	nppc
1039	1.14926e-36	1.34808	0.552	0.199	1.98109e-32	52	tcf7l2
1040	1.42426e-14	1.12566	0.104	0.02	2.45515e-10	52	apof
1041	0	1.90284	1	0.087	0	53	ccnd1
1042	0	1.79978	1	0.096	0	53	ahcy
1043	0	1.59248	0.994	0.091	0	53	tuba8l
1044	0	1.48442	0.969	0.074	0	53	hells
1045	0	1.43823	1	0.072	0	53	nutf2l
1046	0	1.41202	0.962	0.049	0	53	mcm6
1047	0	1.38208	0.956	0.058	0	53	cdca7a
1048	0	1.37398	0.869	0.041	0	53	mki67
1049	5.15214e-268	1.4447	0.888	0.085	8.88125e-264	53	rrm2
1050	6.7936e-223	2.06757	0.988	0.148	1.17108e-218	53	pcna
1051	1.21661e-212	1.72816	0.969	0.143	2.09719e-208	53	npm1a
1052	2.37474e-209	1.38753	0.994	0.139	4.09358e-205	53	selenoh
1053	2.1691e-207	1.57483	0.912	0.117	3.73909e-203	53	her12
1054	2.63254e-171	1.78209	1	0.199	4.53797e-167	53	stmn1a
1055	6.76116e-111	1.5399	0.994	0.267	1.16549e-106	53	her15.1
1056	5.80316e-108	1.67619	1	0.361	1.00035e-103	53	hmgb2a
1057	3.63406e-105	1.5463	1	0.285	6.2644e-101	53	her15.2
1058	1.58007e-101	1.39428	1	0.513	2.72373e-97	53	serbp1a
1059	2.69614e-96	1.45269	1	0.798	4.6476e-92	53	rpl12
1060	6.0458e-95	1.38148	1	0.852	1.04218e-90	53	rps3a
1061	0	2.76745	0.878	0.051	0	54	ppp1r1c
1062	0	2.4352	0.831	0.066	0	54	pou4f1
1063	0	1.99561	0.372	0.011	0	54	si:ch211-145b13.5
1064	0	1.99008	0.5	0.017	0	54	zgc:162928
1065	0	1.97232	0.473	0.006	0	54	foxd3
1066	0	1.95826	0.405	0.012	0	54	gbx2
1067	0	1.93364	0.345	0.005	0	54	zgc:110699
1068	7.7852e-274	1.56502	0.358	0.013	1.34201e-269	54	hmx2
1069	2.11001e-243	1.82791	0.385	0.017	3.63724e-239	54	eya1
1070	2.17538e-214	2.63949	0.608	0.052	3.74992e-210	54	alcamb
1071	2.87945e-182	1.95074	0.547	0.047	4.9636e-178	54	calb1
1072	6.02302e-182	3.04477	0.993	0.201	1.03825e-177	54	foxp4
1073	1.13424e-179	2.66644	0.845	0.127	1.95521e-175	54	hpcal4
1074	2.42517e-169	1.83996	0.824	0.114	4.1805e-165	54	meis2b
1075	2.98823e-160	1.82964	0.507	0.045	5.15111e-156	54	hoxa3a
1076	8.99335e-92	1.72644	0.405	0.05	1.55027e-87	54	grm5a
1077	1.09272e-64	1.52477	0.257	0.027	1.88363e-60	54	hoxb5a
1078	3.09473e-58	1.52169	0.331	0.048	5.33469e-54	54	tac1
1079	9.32053e-54	1.49517	0.75	0.286	1.60667e-49	54	pkib
1080	1.34867e-25	1.4781	0.622	0.316	2.32484e-21	54	lmo3
1081	0	5.92396	0.876	0.056	0	55	ccl34b.1
1082	0	4.78967	0.862	0.018	0	55	apoc1
1083	0	4.6638	0.993	0.035	0	55	pfn1
1084	0	4.30406	0.793	0.027	0	55	apoeb
1085	0	4.00848	0.807	0.004	0	55	lgals3bpb
1086	0	3.65885	0.91	0.005	0	55	fcer1gl
1087	0	3.61377	0.869	0.004	0	55	BX248082.1
1088	0	3.41659	0.834	0.003	0	55	havcr1
1089	0	3.32565	0.848	0.002	0	55	lgals9l1
1090	0	3.32351	0.959	0.004	0	55	arpc1b
1091	0	3.30875	0.848	0.004	0	55	BX901920.1
1092	0	3.21255	0.903	0.011	0	55	si:dkey-27i16.2
1093	0	3.0991	0.821	0.011	0	55	lgals2a
1094	0	3.05688	0.428	0.013	0	55	g0s2
1095	0	3.02992	0.793	0.003	0	55	BX322618.1
1096	0	2.98962	0.8	0.02	0	55	tspan36
1097	0	2.90965	0.8	0.05	0	55	cebpb
1098	0	2.82684	0.8	0.001	0	55	lgals9l3
1099	0	2.74653	0.883	0.076	0	55	zgc:162730
1100	0	2.63232	0.724	0.002	0	55	BX908750.1
1101	0	3.63341	0.829	0.013	0	56	si:dkeyp-110a12.4
1102	0	2.75825	0.943	0.017	0	56	six6b
1103	0	2.31951	0.571	0.009	0	56	rx3
1104	0	2.21614	0.764	0.024	0	56	shha
1105	0	2.15889	0.771	0.013	0	56	six6a
1106	0	2.15103	0.893	0.039	0	56	six3b
1107	0	1.99747	0.429	0.005	0	56	shhb
1108	9.03237e-193	1.97331	0.843	0.104	1.557e-188	56	id3
1109	3.26367e-175	1.98874	0.879	0.121	5.62591e-171	56	her9
1110	7.45817e-167	2.1997	0.9	0.137	1.28564e-162	56	zgc:165461
1111	8.40947e-140	1.88793	0.929	0.167	1.44962e-135	56	her4.3
1112	8.43177e-129	2.09781	0.65	0.086	1.45347e-124	56	mfge8a
1113	3.01182e-115	1.92239	0.807	0.151	5.19177e-111	56	her6
1114	4.90062e-110	1.88597	0.943	0.238	8.4477e-106	56	her4.4
1115	6.23455e-110	1.96971	0.8	0.151	1.07471e-105	56	cebpd
1116	1.08053e-97	2.35194	0.814	0.181	1.86262e-93	56	si:ch211-251b21.1
1117	8.51165e-60	2.11352	0.957	0.571	1.46724e-55	56	fabp7a
1118	8.08416e-52	1.96476	0.721	0.226	1.39355e-47	56	id1
1119	5.6604e-46	2.69256	0.279	0.041	9.7574e-42	56	cyp26b1
1120	3.59788e-10	2.28811	0.193	0.067	6.20202e-06	56	crabp1a
1121	0	4.92823	0.863	0.04	0	57	fabp11a
1122	0	4.34948	0.908	0.036	0	57	si:ch73-335l21.4
1123	0	3.42369	0.817	0.008	0	57	zgc:158423
1124	0	3.40457	0.87	0.009	0	57	krt18
1125	0	3.31031	0.779	0.043	0	57	rgcc
1126	0	3.30421	0.885	0.014	0	57	krt8
1127	0	3.17635	0.504	0.021	0	57	wu:fj16a03
1128	0	2.97628	0.405	0.007	0	57	cxcl12b
1129	0	2.91982	0.847	0.046	0	57	socs3a
1130	0	2.89902	0.687	0.004	0	57	slc16a1a
1131	0	2.8718	0.748	0.008	0	57	clic2
1132	0	2.84268	0.969	0.076	0	57	zgc:162730
1133	1.26321e-253	3.26481	0.901	0.094	2.17752e-249	57	gstp1
1134	2.1677e-150	2.97285	0.786	0.103	3.73668e-146	57	selenop
1135	1.94088e-20	3.47476	0.206	0.044	3.3457e-16	57	hbae1
1136	9.22e-17	3.48384	0.206	0.05	1.58934e-12	57	hbae1.3
1137	5.92873e-14	3.19165	0.244	0.076	1.02199e-09	57	hbae3
1138	2.38957e-12	3.44928	0.183	0.052	4.11915e-08	57	hbbe1.1
1139	2.04373e-09	3.04216	0.206	0.074	3.52298e-05	57	hbbe2
1140	8.39904e-08	3.24835	0.252	0.109	0.00144783	57	AL935210.1
1141	0	2.61948	0.808	0.023	0	58	tuba8l3
1142	0	2.31899	0.869	0.058	0	58	si:ch211-56a11.2
1143	0	2.28119	0.462	0.012	0	58	sst6
1144	0	2.01196	0.654	0.001	0	58	isl2b
1145	0	1.88216	0.538	0.01	0	58	tlx2
1146	0	1.79713	0.608	0.001	0	58	six1b
1147	0	1.69218	0.577	0.017	0	58	eya1
1148	0	1.60944	0.5	0.007	0	58	eya4
1149	0	1.58513	0.5	0.012	0	58	nes
1150	0	1.36642	0.262	0.003	0	58	hmx4
1151	4.26542e-173	2.62345	0.777	0.093	7.35273e-169	58	vim
1152	3.64875e-153	1.57837	0.362	0.021	6.28971e-149	58	prph
1153	1.67591e-140	1.33019	0.6	0.06	2.88894e-136	58	pcbp4
1154	3.41065e-126	1.40824	0.392	0.03	5.87927e-122	58	anxa13l
1155	1.82195e-68	1.30144	0.554	0.098	3.14069e-64	58	insm1b
1156	1.519e-58	1.41713	0.392	0.06	2.61845e-54	58	rpz5
1157	5.41827e-45	1.32541	0.269	0.037	9.34001e-41	58	hey1
1158	2.99474e-23	1.53902	0.162	0.025	5.16233e-19	58	sncga
1159	2.96513e-21	2.05343	0.485	0.181	5.11129e-17	58	chga
1160	1.89235e-19	1.59504	0.392	0.141	3.26203e-15	58	alcama
1161	0	4.54063	0.938	0.005	0	59	kiss1
1162	0	4.50765	0.977	0.002	0	59	GNG14
1163	0	3.75702	0.859	0.024	0	59	ppp1r14ab
1164	0	3.4946	0.922	0.02	0	59	LO018550.1
1165	0	2.93892	0.773	0.01	0	59	csrp2
1166	0	2.8354	0.93	0.077	0	59	si:dkeyp-72h1.1
1167	0	2.72345	0.742	0.016	0	59	wnt11r
1168	0	2.42594	0.578	0.006	0	59	aoc1
1169	0	2.2284	0.188	0	0	59	zgc:173443
1170	0	2.14363	0.617	0.031	0	59	prox1a
1171	0	2.01655	0.508	0.001	0	59	gpr78b
1172	0	1.91202	0.453	0.005	0	59	plekhg5b
1173	3.71423e-201	2.34881	0.797	0.085	6.40259e-197	59	ak5
1174	1.88508e-118	2.25442	0.836	0.169	3.2495e-114	59	phactr3b
1175	2.13239e-118	2.34681	0.938	0.241	3.67582e-114	59	rgs8
1176	3.26564e-110	2.61593	0.703	0.118	5.62932e-106	59	rergla
1177	3.84457e-100	2.21556	0.789	0.18	6.62728e-96	59	arhgdia
1178	1.09511e-96	2.1629	0.992	0.372	1.88775e-92	59	id4
1179	8.56337e-80	2.1651	0.719	0.164	1.47615e-75	59	rgs16
1180	3.17969e-75	1.92028	0.664	0.146	5.48115e-71	59	rgma
1181	0	2.90062	0.776	0.03	0	60	penkb
1182	6.19001e-212	3.10087	0.879	0.084	1.06703e-207	60	rtn4rl2a
1183	4.65915e-184	2.36159	0.589	0.04	8.03144e-180	60	six3b
1184	4.93204e-174	2.39834	0.383	0.018	8.50186e-170	60	rtn4rl2b
1185	7.74027e-167	1.39994	0.327	0.013	1.33427e-162	60	zgc:101731
1186	6.78284e-159	1.91506	0.542	0.039	1.16923e-154	60	sp9
1187	1.14048e-112	2.13324	0.794	0.124	1.96596e-108	60	tspan18a
1188	2.57117e-103	1.72546	0.589	0.067	4.43218e-99	60	dlx5a
1189	8.41387e-93	1.40557	0.523	0.058	1.45038e-88	60	dlx2a
1190	2.54004e-80	1.37865	0.421	0.044	4.37852e-76	60	foxg1a
1191	4.14269e-80	1.44592	0.458	0.051	7.14117e-76	60	six3a
1192	1.79555e-53	1.73627	0.402	0.059	3.09517e-49	60	egr2b
1193	2.72109e-45	1.36496	0.243	0.026	4.69062e-41	60	vax1
1194	7.88645e-43	1.64736	0.636	0.18	1.35947e-38	60	egr1
1195	1.36987e-34	1.51481	0.897	0.559	2.36139e-30	60	egr4
1196	1.75282e-30	1.54636	0.168	0.018	3.02151e-26	60	trh
1197	5.1932e-29	1.45044	0.355	0.076	8.95203e-25	60	zgc:114118
1198	1.99933e-27	1.51784	0.589	0.223	3.44645e-23	60	pabpc1b
1199	2.25314e-06	1.47807	0.421	0.274	0.0388397	60	itm2cb
1200	1.3762e-05	2.02391	0.121	0.04	0.237229	60	npy
1201	4.47378e-103	0.942403	0.664	0.08	7.7119e-99	61	atf5b
1202	9.06326e-94	0.944766	0.626	0.075	1.56232e-89	61	ccdc136b
1203	5.32024e-93	1.10614	0.673	0.089	9.17103e-89	61	pou4f2
1204	2.73245e-83	1.00077	0.514	0.059	4.7102e-79	61	CR361551.1
1205	4.97457e-74	1.05048	0.841	0.158	8.57516e-70	61	pclob
1206	7.36541e-70	1.04261	0.645	0.103	1.26965e-65	61	cxcl14
1207	4.51052e-68	0.739527	0.579	0.083	7.77524e-64	61	zgc:91818
1208	1.75429e-62	0.828823	0.785	0.149	3.02404e-58	61	arhgef9b
1209	4.01888e-55	0.783754	0.542	0.087	6.92775e-51	61	CR847531.1
1210	1.60379e-54	0.749751	0.682	0.129	2.76461e-50	61	ajap1
1211	5.79655e-54	0.890165	0.766	0.168	9.99209e-50	61	bcl11ba
1212	1.48554e-52	0.757764	0.766	0.159	2.56077e-48	61	kcnc1a
1213	2.64977e-49	0.763453	0.757	0.166	4.56767e-45	61	trim13
1214	2.86299e-46	1.05503	0.991	0.432	4.93522e-42	61	cplx2l
1215	1.44287e-44	1.01527	1	0.512	2.48722e-40	61	pcp4a
1216	4.24713e-44	0.83426	0.85	0.231	7.3212e-40	61	sypa
1217	9.69222e-42	0.899411	0.981	0.366	1.67075e-37	61	bhlhe40
1218	2.12917e-36	0.921758	0.888	0.31	3.67026e-32	61	slc6a1b
1219	3.64872e-36	0.848537	0.897	0.315	6.28966e-32	61	sv2a
1220	3.54557e-29	0.785021	0.972	0.494	6.11186e-25	61	npas4a
1221	0	4.56859	1	0.021	0	62	synpr
1222	0	3.73254	0.71	0.006	0	62	pyyb
1223	0	2.64172	0.71	0.015	0	62	sp8a
1224	0	2.02471	0.495	0.001	0	62	parm1
1225	7.55351e-277	1.87315	0.43	0.012	1.30207e-272	62	sall3a
1226	5.83293e-272	1.74076	0.366	0.009	1.00548e-267	62	chodl
1227	1.12603e-205	2.51944	0.645	0.038	1.94105e-201	62	cort
1228	2.31186e-201	1.98119	0.624	0.036	3.98519e-197	62	si:ch211-203b8.6
1229	2.30266e-194	2.04553	0.688	0.046	3.96933e-190	62	pcp4l1
1230	7.89185e-171	1.69099	0.419	0.019	1.3604e-166	62	syt10
1231	2.07006e-162	1.72748	0.344	0.013	3.56838e-158	62	zgc:101731
1232	8.60333e-154	2.07934	0.742	0.067	1.48304e-149	62	dlx5a
1233	1.19057e-131	1.69242	0.441	0.027	2.05231e-127	62	rpp25b
1234	5.0275e-124	1.80441	0.462	0.032	8.66641e-120	62	gdpd5b
1235	1.71257e-111	2.717	0.538	0.048	2.95213e-107	62	tac1
1236	9.10029e-95	2.25921	0.742	0.116	1.56871e-90	62	fkbp1b
1237	1.49128e-63	1.78946	0.86	0.217	2.57067e-59	62	nrgna
1238	4.34781e-57	2.01682	0.742	0.18	7.49476e-53	62	egr1
1239	2.06473e-46	2.02172	0.957	0.559	3.55917e-42	62	egr4
1240	7.06104e-38	1.8696	0.634	0.18	1.21718e-33	62	mt2
1241	0	2.86575	0.722	0.004	0	63	havcr2
1242	0	2.85499	0.833	0.034	0	63	mfge8b
1243	0	2.15074	0.444	0.004	0	63	foxb1b
1244	0	2.1112	0.522	0.008	0	63	CR855337.1
1245	2.31314e-265	1.94797	0.456	0.014	3.98739e-261	63	mstnb
1246	1.56407e-186	2.27678	0.933	0.088	2.69614e-182	63	pou4f2
1247	1.49991e-154	2.15888	0.878	0.092	2.58554e-150	63	tfap2b
1248	4.4692e-147	1.8197	0.511	0.032	7.70401e-143	63	si:dkey-164f24.2
1249	4.88996e-122	2.07393	0.567	0.048	8.42931e-118	63	ncs1b
1250	1.66692e-114	2.1743	0.756	0.092	2.87344e-110	63	zbtb18
1251	7.09712e-103	2.165	0.744	0.104	1.2234e-98	63	gng13b
1252	1.80383e-97	2.16806	0.722	0.102	3.10945e-93	63	cdh4
1253	1.09396e-95	2.13232	0.944	0.183	1.88577e-91	63	neurod1
1254	2.73392e-90	1.78422	0.522	0.052	4.71273e-86	63	ppp1r1c
1255	3.90968e-87	2.16503	0.911	0.194	6.73951e-83	63	trim9
1256	8.176e-86	1.91281	0.622	0.082	1.40938e-81	63	zeb2a
1257	8.36087e-77	1.89457	0.633	0.095	1.44125e-72	63	il1rapl1a
1258	2.84857e-76	2.4742	0.911	0.24	4.91037e-72	63	cited4b
1259	1.30468e-62	1.91229	0.611	0.103	2.249e-58	63	cxcl14
1260	2.1429e-59	1.94409	1	0.512	3.69392e-55	63	pcp4a
1261	0	5.15038	0.892	0.007	0	64	adcyap1a
1262	0	2.85315	0.932	0.011	0	64	CABZ01112647.1
1263	0	2.45045	0.689	0.007	0	64	irx4a
1264	0	2.38806	0.716	0.022	0	64	slc5a7a
1265	1.43347e-155	2.08065	0.392	0.015	2.47101e-151	64	ptger4c
1266	1.11102e-127	1.67326	0.473	0.026	1.91518e-123	64	irx1b
1267	5.99615e-103	1.56753	0.514	0.037	1.03362e-98	64	rprma
1268	1.13637e-89	2.93134	0.824	0.125	1.95888e-85	64	calb2a
1269	2.70512e-87	2.4145	0.608	0.065	4.66309e-83	64	pyya
1270	5.51312e-64	1.65083	0.5	0.056	9.50352e-60	64	irx2a
1271	6.48947e-55	1.69	0.527	0.071	1.11866e-50	64	kctd12.2
1272	9.27409e-48	1.5379	0.514	0.075	1.59867e-43	64	irx1a
1273	1.17535e-40	2.13638	0.932	0.367	2.02606e-36	64	adcyap1b
1274	2.51346e-35	1.51711	0.986	0.494	4.33271e-31	64	scg2b
1275	3.80449e-34	1.16944	0.459	0.079	6.55817e-30	64	si:dkeyp-72h1.1
1276	1.33286e-29	1.18018	0.432	0.081	2.29758e-25	64	aclya
1277	8.62042e-27	1.19261	0.568	0.136	1.48599e-22	64	cbln1
1278	1.63895e-26	1.15445	0.541	0.132	2.82523e-22	64	fstl5
1279	1.73484e-23	1.17392	0.419	0.089	2.99052e-19	64	qdpra
1280	2.62207e-22	1.80192	0.595	0.203	4.51992e-18	64	foxp4
1281	0	2.75457	0.841	0.011	0	65	cldn7a
1282	3.194e-242	3.9312	1	0.04	5.50581e-238	65	aqp1a.1
1283	1.43165e-233	3.39119	0.932	0.036	2.46787e-229	65	gyg1b
1284	2.11665e-179	2.42394	0.864	0.038	3.64869e-175	65	hspb15
1285	2.1537e-179	2.4421	0.864	0.039	3.71255e-175	65	wnt7aa
1286	1.28797e-169	2.60679	0.955	0.051	2.2202e-165	65	hepacama
1287	3.35473e-154	3.16227	0.977	0.062	5.78289e-150	65	ndnf
1288	8.61463e-120	2.72818	1	0.085	1.48499e-115	65	spry2
1289	1.05319e-110	2.42444	0.864	0.064	1.81548e-106	65	si:dkey-85k7.7
1290	6.1552e-110	2.65622	0.932	0.079	1.06103e-105	65	grm2b
1291	1.61724e-92	2.49015	0.977	0.104	2.7878e-88	65	selenop
1292	2.27169e-79	3.52644	1	0.139	3.91593e-75	65	zgc:165461
1293	7.6627e-73	2.46696	0.955	0.129	1.3209e-68	65	efhd1
1294	2.12642e-67	2.6093	1	0.157	3.66552e-63	65	atp1a1b
1295	4.54788e-61	2.8972	0.932	0.152	7.83963e-57	65	cebpd
1296	2.80947e-59	3.67995	0.977	0.181	4.84297e-55	65	mt2
1297	2.48476e-54	2.73217	1	0.212	4.28322e-50	65	mdka
1298	1.9773e-52	2.59001	0.977	0.193	3.40847e-48	65	ptgdsb.1
1299	7.53972e-46	2.50076	0.977	0.226	1.2997e-41	65	id1
1300	1.22868e-45	2.5459	1	0.264	2.118e-41	65	slc1a2b
1301	0	3.08207	0.857	0.017	0	66	foxd2
1302	0	2.94024	0.333	0.001	0	66	si:dkey-248g15.3
1303	2.5181e-188	2.13871	0.643	0.019	4.3407e-184	66	si:ch211-215d8.2
1304	1.65873e-152	2.07099	0.381	0.008	2.85932e-148	66	foxa2
1305	2.19503e-102	3.6827	0.738	0.048	3.78379e-98	66	tac1
1306	7.31889e-101	1.98251	0.548	0.026	1.26163e-96	66	nr4a2b
1307	9.55443e-99	2.92798	0.905	0.079	1.64699e-94	66	grm2b
1308	1.40623e-79	1.91025	0.619	0.042	2.42406e-75	66	onecut1
1309	1.32259e-56	1.74614	0.286	0.012	2.27988e-52	66	uts1
1310	1.5302e-42	1.90724	0.881	0.166	2.63777e-38	66	pou3f1
1311	6.33387e-26	1.71519	0.929	0.337	1.09183e-21	66	islr2
1312	6.43571e-22	1.51392	0.714	0.191	1.10939e-17	66	msi2b
1313	6.04565e-21	1.7173	0.619	0.15	1.04215e-16	66	arhgef9b
1314	2.75168e-19	1.4368	0.69	0.182	4.74335e-15	66	ngb
1315	3.09008e-17	1.24201	0.548	0.127	5.32668e-13	66	si:dkey-62k3.5
1316	4.34953e-16	1.27221	0.5	0.116	7.49773e-12	66	BX957317.1
1317	6.07919e-13	1.20848	0.405	0.093	1.04793e-08	66	tp53i11b
1318	1.83252e-08	1.18976	0.333	0.092	0.00031589	66	nxph1
1319	5.83533e-07	1.1399	0.31	0.095	0.0100589	66	znf536
1320	7.958e-06	1.30338	0.357	0.141	0.13718	66	BX470182.1
1321	0	5.36832	0.902	0.02	0	67	hbbe1.2
1322	0	2.87907	0.805	0.003	0	67	si:ch211-103n10.5
1323	0	2.05483	0.659	0.001	0	67	slc4a1a
1324	0	1.76135	0.634	0.002	0	67	alas2
1325	0	1.72672	0.585	0.004	0	67	hemgn
1326	0	1.37933	0.585	0.001	0	67	si:ch211-207c6.2
1327	0	1.21158	0.585	0.001	0	67	zgc:163057
1328	0	1.17887	0.585	0.002	0	67	nt5c2l1
1329	0	1.12375	0.561	0.001	0	67	si:ch211-250g4.3
1330	0	1.12195	0.585	0.001	0	67	BX005417.1
1331	6.02955e-231	4.5478	0.756	0.022	1.03937e-226	67	hbae5
1332	1.95582e-212	6.2736	1	0.043	3.37144e-208	67	hbae1
1333	2.91307e-187	6.19031	1	0.05	5.02155e-183	67	hbae1.3
1334	9.1148e-182	5.97219	1	0.051	1.57121e-177	67	hbbe1.1
1335	1.7569e-127	6.02567	1	0.075	3.02854e-123	67	hbae3
1336	8.61301e-118	5.54146	0.951	0.073	1.48471e-113	67	hbbe2
1337	3.86668e-116	2.83562	0.756	0.044	6.66539e-112	67	cahz
1338	8.05242e-84	1.39147	0.634	0.04	1.38808e-79	67	blvrb
1339	4.56631e-83	6.43799	0.951	0.109	7.87141e-79	67	AL935210.1
1340	1.04551e-49	1.431	0.634	0.066	1.80226e-45	67	tspo
1341	0	5.17858	1	0.015	0	68	tac3b
1342	0	3.08545	0.788	0.001	0	68	gabrr2b
1343	0	2.07959	0.485	0.003	0	68	FAM163A
1344	8.51095e-261	3.67837	1	0.028	1.46712e-256	68	grm2a
1345	1.41906e-182	1.97902	0.485	0.009	2.44617e-178	68	grm6b
1346	7.7388e-166	2.58555	0.727	0.022	1.33401e-161	68	LO018550.1
1347	1.85819e-140	2.49413	0.636	0.02	3.20315e-136	68	apof
1348	2.97513e-122	2.60868	0.818	0.039	5.12852e-118	68	si:dkey-1h6.8
1349	3.52333e-116	1.9535	0.485	0.014	6.07352e-112	68	st6galnac5b
1350	5.91028e-83	2.13903	0.636	0.033	1.01881e-78	68	tbr1b
1351	2.36695e-62	2.12846	0.636	0.046	4.08015e-58	68	mdm2
1352	1.34876e-58	1.75418	0.455	0.024	2.32499e-54	68	emx3
1353	4.20783e-55	2.15063	0.636	0.051	7.25345e-51	68	syt9b
1354	7.46173e-48	1.77531	0.576	0.047	1.28625e-43	68	ccl44
1355	2.98602e-39	1.75409	0.394	0.027	5.1473e-35	68	prex1
1356	2.26508e-36	1.92206	0.606	0.068	3.90455e-32	68	lmo4a
1357	4.74116e-31	2.02732	0.727	0.122	8.17281e-27	68	necab1
1358	2.17555e-22	1.79227	0.818	0.232	3.75021e-18	68	elmo1
1359	2.05599e-21	1.80189	0.848	0.241	3.54412e-17	68	cited4b
1360	7.71485e-19	2.12459	0.697	0.181	1.32989e-14	68	aplp2
