# Supplementary material for: The landscape of regulatory genes in brain-wide neuronal phenotypes of a vertebrate brain
Source: eLife. 2021 Dec 13;10:e68224. doi: 10.7554/eLife.68224 (PMC8769648; doi:10.7554/eLife.68224)
Supplement: Figure 1—source data 5. [file elife-68224-fig1-data5.xlsx]

## Sheet: table S6. major cell type marke
	p_val	avg_logFC	pct.1	pct.2	p_val_adj	cluster	gene
adcyap1b	0	1.51539	0.587	0.215	0	1	adcyap1b	IIa
nrgna	0	1.34313	0.294	0.165	0	1	nrgna	IIa
lhx9	0	1.25173	0.269	0.063	0	1	lhx9	IIa
barhl2	0	1.00471	0.179	0.05	0	1	barhl2	IIa
nell2b	0	0.918397	0.37	0.159	0	1	nell2b	IIa
nrn1a	0	0.901073	0.371	0.116	0	1	nrn1a	IIa
bdnf	0	0.778202	0.215	0.07	0	1	bdnf	IIa
ebf3a	0	0.718253	0.315	0.172	0	1	ebf3a	IIa
pcp4a	0	0.61294	0.624	0.437	0	1	pcp4a	IIa
slc17a6b	0	0.610042	0.178	0.061	0	1	slc17a6b	IIa
gap43	0	0.544612	0.66	0.457	0	1	gap43	IIa
olfm1b	0	0.500073	0.589	0.408	0	1	olfm1b	IIa
basp1	0	0.421241	0.767	0.575	0	1	basp1	IIa
tmsb2	0	0.401414	0.841	0.666	0	1	tmsb2	IIa
zc4h2	0	0.384241	0.76	0.653	0	1	zc4h2	IIa
stmn4	0	0.384169	0.641	0.488	0	1	stmn4	IIa
stmn2a	0	0.355391	0.699	0.538	0	1	stmn2a	IIa
si:dkey-276j7.1	0	0.344328	0.784	0.688	0	1	si:dkey-276j7.1	IIa
gng2	0	0.343232	0.624	0.476	0	1	gng2	IIa
nsg2	0	0.334682	0.798	0.637	0	1	nsg2	IIa
snap25a	0	0.319207	0.829	0.682	0	1	snap25a	IIa
rtn1b	0	0.305525	0.803	0.662	0	1	rtn1b	IIa
rtn1a	0	0.292313	0.907	0.817	0	1	rtn1a	IIa
mllt11	7.51395e-290	0.34506	0.667	0.544	1.29525e-285	1	mllt11	IIa
cbln2b	7.1293e-287	0.981157	0.231	0.114	1.22895e-282	1	cbln2b	IIa
tcf7l2	3.06642e-279	1.03436	0.27	0.152	5.28589e-275	1	tcf7l2	IIa
tubb5	1.21769e-276	0.585303	0.556	0.446	2.09905e-272	1	tubb5	IIa
rbfox1	2.22853e-275	0.431136	0.443	0.291	3.84153e-271	1	rbfox1	IIa
tmem59l	3.69392e-274	0.306584	0.72	0.579	6.36757e-270	1	tmem59l	IIa
camk2n1a	7.35136e-268	0.417241	0.632	0.516	1.26723e-263	1	camk2n1a	IIa
calm1b	1.10069e-247	0.395207	0.631	0.534	1.89737e-243	1	calm1b	IIa
celf2	3.92141e-247	0.455681	0.451	0.327	6.75973e-243	1	celf2	IIa
nrxn1a	7.3844e-237	0.439052	0.417	0.285	1.27292e-232	1	nrxn1a	IIa
neurod6a	6.14024e-234	0.714174	0.141	0.054	1.05845e-229	1	neurod6a	IIa
cbx1b	8.86465e-234	0.275841	0.718	0.617	1.52809e-229	1	cbx1b	IIa
ywhag1	1.75781e-232	0.468613	0.322	0.198	3.03011e-228	1	ywhag1	IIa
marcksb	1.88584e-228	0.306033	0.715	0.634	3.2508e-224	1	marcksb	IIa
stmn2b	2.5134e-226	0.425711	0.486	0.362	4.3326e-222	1	stmn2b	IIa
lmo3	1.3089e-224	0.979686	0.377	0.276	2.25628e-220	1	lmo3	IIa
c1qtnf4	1.91585e-215	0.348232	0.366	0.232	3.30254e-211	1	c1qtnf4	IIa
ywhaz	1.70071e-214	0.257199	0.65	0.555	2.93168e-210	1	ywhaz	IIa
mab21l1	1.00278e-213	0.589527	0.274	0.166	1.72859e-209	1	mab21l1	IIa
zgc:65894	2.36538e-211	0.295537	0.67	0.559	4.07744e-207	1	zgc:65894	IIa
pou4f2	1.95219e-209	1.18894	0.137	0.057	3.36519e-205	1	pou4f2	IIa
jpt1b	3.67405e-202	0.340186	0.595	0.509	6.33333e-198	1	jpt1b	IIa
si:dkey-174m14.3	4.47773e-201	0.465698	0.174	0.082	7.71871e-197	1	si:dkey-174m14.3	IIa
cdc42	1.07323e-200	0.270554	0.708	0.664	1.85004e-196	1	cdc42	IIa
calm2b	2.07542e-198	0.335419	0.638	0.553	3.57761e-194	1	calm2b	IIa
ppp3cb	9.27003e-198	0.394782	0.368	0.248	1.59797e-193	1	ppp3cb	IIa
tuba2	1.18043e-196	0.316905	0.542	0.419	2.03482e-192	1	tuba2	IIa
cbln1	1.12411e-195	0.824128	0.191	0.1	1.93774e-191	1	cbln1	IIa
r3hdm1	3.57962e-183	0.558567	0.317	0.214	6.17054e-179	1	r3hdm1	IIa
maptb	3.77717e-182	0.369958	0.405	0.291	6.51109e-178	1	maptb	IIa
pbx3b	4.16986e-181	0.552692	0.382	0.286	7.18801e-177	1	pbx3b	IIa
arhgdig	1.16403e-180	0.539946	0.189	0.1	2.00655e-176	1	arhgdig	IIa
ddit3	1.81176e-177	0.730886	0.229	0.137	3.12312e-173	1	ddit3	IIa
syt12	2.62555e-175	0.408669	0.28	0.174	4.52592e-171	1	syt12	IIa
rab11bb	5.84386e-172	0.351482	0.377	0.263	1.00736e-167	1	rab11bb	IIa
ctnnbip1	5.02877e-169	0.477314	0.452	0.366	8.6686e-165	1	ctnnbip1	IIa
serpini1	1.98586e-168	0.381561	0.386	0.273	3.42322e-164	1	serpini1	IIa
calb2a	2.08321e-168	0.792546	0.175	0.092	3.59103e-164	1	calb2a	IIa
cd99l2	5.49958e-163	0.500981	0.439	0.355	9.48018e-159	1	cd99l2	IIa
rtn4rl2a	7.4583e-163	0.760133	0.128	0.057	1.28566e-158	1	rtn4rl2a	IIa
cdk5r2a	8.52431e-163	0.319378	0.466	0.353	1.46942e-158	1	cdk5r2a	IIa
fscn1a	3.2265e-161	0.310747	0.558	0.472	5.56185e-157	1	fscn1a	IIa
ppp3ca	2.04742e-160	0.473696	0.242	0.149	3.52935e-156	1	ppp3ca	IIa
ca10a	8.56765e-159	0.439164	0.195	0.108	1.47689e-154	1	ca10a	IIa
ppp3r1b	1.31247e-155	0.325475	0.506	0.417	2.26244e-151	1	ppp3r1b	IIa
neurod6b	5.70088e-154	0.640864	0.148	0.074	9.82718e-150	1	neurod6b	IIa
pou4f1	5.98454e-154	0.481072	0.106	0.043	1.03162e-149	1	pou4f1	IIa
bcl11ba	8.36667e-153	0.527146	0.221	0.134	1.44225e-148	1	bcl11ba	IIa
zgc:101840	1.76751e-147	0.355438	0.406	0.307	3.04683e-143	1	zgc:101840	IIa
barhl1a	1.94156e-146	0.7305	0.103	0.044	3.34686e-142	1	barhl1a	IIa
si:dkey-7j14.5	2.17293e-143	0.34564	0.46	0.361	3.7457e-139	1	si:dkey-7j14.5	IIa
cpne4a	2.51635e-143	0.604007	0.115	0.052	4.33768e-139	1	cpne4a	IIa
robo2	6.16024e-139	0.419115	0.214	0.13	1.0619e-134	1	robo2	IIa
hsbp1a	7.54805e-138	0.358806	0.518	0.448	1.30113e-133	1	hsbp1a	IIa
id2a	3.08898e-137	0.487382	0.555	0.493	5.32478e-133	1	id2a	IIa
islr2	5.59833e-136	0.371468	0.395	0.297	9.6504e-132	1	islr2	IIa
aplp1	7.36856e-134	0.284055	0.447	0.346	1.27019e-129	1	aplp1	IIa
rtn4r	3.05611e-133	0.367414	0.15	0.079	5.26812e-129	1	rtn4r	IIa
scg2b	1.67961e-131	0.280265	0.553	0.454	2.89531e-127	1	scg2b	IIa
zgc:153426	2.11463e-130	0.309837	0.482	0.396	3.64519e-126	1	zgc:153426	IIa
CAMK2N1	1.10661e-128	0.371688	0.414	0.327	1.90757e-124	1	CAMK2N1	IIa
sox4a	4.45764e-125	0.488035	0.474	0.408	7.68408e-121	1	sox4a	IIa
id4	3.40428e-122	0.256388	0.43	0.334	5.8683e-118	1	id4	IIa
gnao1b	4.20578e-120	0.331042	0.285	0.198	7.24993e-116	1	gnao1b	IIa
meis2b	3.86542e-119	0.605467	0.156	0.089	6.6632e-115	1	meis2b	IIa
lin7a	1.17676e-117	0.435254	0.333	0.248	2.02849e-113	1	lin7a	IIa
cspg5a	1.24696e-114	0.279856	0.507	0.433	2.14951e-110	1	cspg5a	IIa
map1b	2.10943e-111	0.342069	0.233	0.154	3.63623e-107	1	map1b	IIa
ak5	9.94976e-111	0.332734	0.122	0.063	1.71514e-106	1	ak5	IIa
grin1a	2.04531e-109	0.310954	0.283	0.199	3.52571e-105	1	grin1a	IIa
tmsb1	5.62847e-108	0.381388	0.379	0.293	9.70237e-104	1	tmsb1	IIa
map7d2b	4.13332e-105	0.305125	0.31	0.226	7.12503e-101	1	map7d2b	IIa
tuba1a	2.31008e-103	0.294935	0.588	0.543	3.98212e-99	1	tuba1a	IIa
syt5b	4.97758e-103	0.465895	0.121	0.065	8.58035e-99	1	syt5b	IIa
bhlhe22	6.2987e-103	0.588733	0.122	0.067	1.08577e-98	1	bhlhe22	IIa
ctnnb1	1.79803e-102	0.354251	0.525	0.485	3.09945e-98	1	ctnnb1	IIa
nat8l	2.02658e-102	0.341174	0.433	0.368	3.49341e-98	1	nat8l	IIa
dclk1b	4.22115e-102	0.339043	0.198	0.128	7.27641e-98	1	dclk1b	IIa
lgi1a	9.86368e-100	0.332015	0.263	0.188	1.7003e-95	1	lgi1a	IIa
serp2	2.07512e-97	0.302403	0.251	0.175	3.5771e-93	1	serp2	IIa
fam49al	2.21698e-96	0.250408	0.456	0.379	3.82163e-92	1	fam49al	IIa
rab6ba	6.88946e-96	0.270578	0.316	0.234	1.1876e-91	1	rab6ba	IIa
myt1la	7.13939e-96	0.329844	0.162	0.099	1.23069e-91	1	myt1la	IIa
nptx1l	1.86346e-95	0.362319	0.202	0.133	3.21223e-91	1	nptx1l	IIa
chd5	2.4418e-95	0.318329	0.251	0.177	4.20917e-91	1	chd5	IIa
ppp1r14ba	3.17343e-94	0.342237	0.163	0.101	5.47035e-90	1	ppp1r14ba	IIa
si:dkey-35i13.1	1.57022e-92	0.293586	0.34	0.262	2.70674e-88	1	si:dkey-35i13.1	IIa
fam168a	2.47389e-92	0.256515	0.537	0.494	4.2645e-88	1	fam168a	IIa
rbfox3a	2.98696e-92	0.30769	0.233	0.161	5.14892e-88	1	rbfox3a	IIa
ncalda	9.19335e-91	0.383824	0.446	0.4	1.58475e-86	1	ncalda	IIa
pcdh11	3.44123e-90	0.34539	0.155	0.095	5.932e-86	1	pcdh11	IIa
sprn	3.71254e-89	0.298476	0.259	0.185	6.39968e-85	1	sprn	IIa
dpysl3	5.34072e-88	0.309698	0.354	0.286	9.20634e-84	1	dpysl3	IIa
gpr85	5.60526e-88	0.302739	0.238	0.167	9.66234e-84	1	gpr85	IIa
kctd4	9.55079e-88	0.525081	0.284	0.215	1.64637e-83	1	kctd4	IIa
si:dkey-12h9.6	3.89393e-86	0.327249	0.141	0.085	6.71236e-82	1	si:dkey-12h9.6	IIa
fgf12a	9.18114e-86	0.343527	0.139	0.084	1.58264e-81	1	fgf12a	IIa
gria2b	1.59635e-84	0.286194	0.237	0.167	2.75179e-80	1	gria2b	IIa
st8sia5	4.62445e-84	0.292134	0.169	0.108	7.97163e-80	1	st8sia5	IIa
BX957317.1	8.99085e-83	0.359179	0.15	0.094	1.54984e-78	1	BX957317.1	IIa
fgf13a	2.96548e-82	0.310682	0.178	0.117	5.11189e-78	1	fgf13a	IIa
hpca	5.46903e-82	0.330589	0.229	0.165	9.42751e-78	1	hpca	IIa
khdrbs2	1.37918e-81	0.325762	0.188	0.126	2.37743e-77	1	khdrbs2	IIa
ngb	2.54766e-80	0.346242	0.221	0.155	4.39166e-76	1	ngb	IIa
carmil2	3.84412e-80	0.270458	0.232	0.164	6.62649e-76	1	carmil2	IIa
dcaf7	1.5402e-79	0.255314	0.515	0.477	2.655e-75	1	dcaf7	IIa
olfm2a	5.51576e-78	0.297244	0.245	0.178	9.50806e-74	1	olfm2a	IIa
camkvb	6.57651e-76	0.313718	0.13	0.079	1.13366e-71	1	camkvb	IIa
jpt1a	6.84378e-76	0.277014	0.205	0.142	1.17973e-71	1	jpt1a	IIa
CABZ01102109.1	4.91093e-75	0.326555	0.143	0.09	8.46545e-71	1	CABZ01102109.1	IIa
rims2b	3.47964e-74	0.377137	0.114	0.067	5.9982e-70	1	rims2b	IIa
kifap3a	3.77019e-74	0.280532	0.276	0.21	6.49906e-70	1	kifap3a	IIa
dynll2b	9.64843e-74	0.275802	0.473	0.432	1.6632e-69	1	dynll2b	IIa
uchl1	1.43141e-73	0.252759	0.343	0.273	2.46747e-69	1	uchl1	IIa
kdm2ba	1.67112e-73	0.321936	0.31	0.251	2.88067e-69	1	kdm2ba	IIa
camk2n2	9.055e-73	0.368041	0.128	0.08	1.5609e-68	1	camk2n2	IIa
chga	1.12131e-72	0.253677	0.22	0.156	1.93291e-68	1	chga	IIa
mab21l2	2.28914e-72	0.430001	0.19	0.134	3.94601e-68	1	mab21l2	IIa
tspan13b	1.974e-71	0.272986	0.234	0.171	3.40279e-67	1	tspan13b	IIa
slitrk4	2.07968e-71	0.279376	0.143	0.09	3.58495e-67	1	slitrk4	IIa
clstn1	1.40323e-70	0.283749	0.407	0.353	2.41889e-66	1	clstn1	IIa
grin1b	4.23812e-70	0.251459	0.309	0.241	7.30567e-66	1	grin1b	IIa
ldb2a	8.91741e-70	0.344124	0.123	0.076	1.53718e-65	1	ldb2a	IIa
pcdh7b	5.71541e-69	0.322906	0.192	0.135	9.85223e-65	1	pcdh7b	IIa
kif3cb	6.96458e-69	0.272268	0.167	0.112	1.20055e-64	1	kif3cb	IIa
kcnc1a	1.72225e-68	0.28479	0.195	0.137	2.96882e-64	1	kcnc1a	IIa
kdm6bb	7.50762e-68	0.290939	0.251	0.19	1.29416e-63	1	kdm6bb	IIa
pde4ba	4.70556e-67	0.290083	0.262	0.202	8.11144e-63	1	pde4ba	IIa
lef1	2.46906e-66	0.473512	0.126	0.081	4.25616e-62	1	lef1	IIa
gabrb4	4.42942e-66	0.250923	0.152	0.099	7.63543e-62	1	gabrb4	IIa
si:dkeyp-72g9.4	6.81676e-66	0.264213	0.199	0.141	1.17507e-61	1	si:dkeyp-72g9.4	IIa
atat1	9.83409e-62	0.26544	0.151	0.101	1.6952e-57	1	atat1	IIa
rbfox2	3.48916e-61	0.281625	0.331	0.277	6.01461e-57	1	rbfox2	IIa
cpne2	2.60706e-60	0.328196	0.142	0.094	4.49406e-56	1	cpne2	IIa
camta1b	4.98695e-60	0.314875	0.187	0.135	8.59651e-56	1	camta1b	IIa
trim13	1.20281e-58	0.30218	0.199	0.146	2.0734e-54	1	trim13	IIa
necab2	1.94493e-58	0.272188	0.115	0.073	3.35266e-54	1	necab2	IIa
sertad4	3.22864e-58	0.297724	0.108	0.067	5.56553e-54	1	sertad4	IIa
si:dkey-56f14.4	1.18567e-56	0.268749	0.155	0.106	2.04386e-52	1	si:dkey-56f14.4	IIa
syt9a	5.05551e-55	0.252125	0.159	0.111	8.71469e-51	1	syt9a	IIa
BX927184.1	1.13852e-54	0.273112	0.103	0.064	1.96258e-50	1	BX927184.1	IIa
nr2f1a	8.38047e-54	0.399422	0.345	0.303	1.44463e-49	1	nr2f1a	IIa
palm1a	2.54718e-53	0.285143	0.199	0.151	4.39083e-49	1	palm1a	IIa
vsnl1a	1.55154e-51	0.253601	0.15	0.104	2.67455e-47	1	vsnl1a	IIa
calm2a	9.36253e-51	0.270728	0.415	0.369	1.61391e-46	1	calm2a	IIa
CR847531.1	2.48058e-50	0.253349	0.112	0.072	4.27602e-46	1	CR847531.1	IIa
atf5b	1.89502e-47	0.939916	0.101	0.068	3.26664e-43	1	atf5b	IIa
tfap2b	2.28823e-46	0.416498	0.116	0.078	3.94445e-42	1	tfap2b	IIa
ppp1r14c	9.17044e-46	0.308346	0.129	0.09	1.5808e-41	1	ppp1r14c	IIa
camk2b1	5.27316e-45	0.269929	0.169	0.125	9.08987e-41	1	camk2b1	IIa
klf7b	1.00282e-44	0.267182	0.173	0.13	1.72866e-40	1	klf7b	IIa
timp2a	4.24967e-44	0.252511	0.164	0.121	7.32558e-40	1	timp2a	IIa
smu1b	1.03326e-42	0.262689	0.192	0.147	1.78113e-38	1	smu1b	IIa
oip5-as1	1.13178e-42	0.293145	0.236	0.193	1.95096e-38	1	oip5-as1	IIa
ank2b	3.92358e-41	0.250217	0.204	0.161	6.76346e-37	1	ank2b	IIa
pcdh19	6.61962e-41	0.323362	0.261	0.219	1.14109e-36	1	pcdh19	IIa
pik3r3b	3.50103e-40	0.301985	0.244	0.203	6.03508e-36	1	pik3r3b	IIa
sox4b	4.07828e-39	0.308699	0.182	0.142	7.03014e-35	1	sox4b	IIa
rgmb	5.9599e-39	0.30672	0.15	0.113	1.02737e-34	1	rgmb	IIa
si:dkey-33c12.3	2.79308e-38	0.262456	0.194	0.152	4.81471e-34	1	si:dkey-33c12.3	IIa
klf7a	4.45031e-38	0.250071	0.154	0.116	7.67145e-34	1	klf7a	IIa
nanos1	4.54897e-38	0.269675	0.306	0.266	7.84152e-34	1	nanos1	IIa
b3galt2	1.68462e-36	0.267269	0.151	0.114	2.90395e-32	1	b3galt2	IIa
vamp1	3.09982e-34	0.262641	0.139	0.104	5.34346e-30	1	vamp1	IIa
fxyd6l	7.7466e-34	0.272999	0.27	0.236	1.33536e-29	1	fxyd6l	IIa
BX470182.1	1.29816e-33	0.253428	0.164	0.126	2.23776e-29	1	BX470182.1	IIa
FP085414.1	7.04888e-33	0.259119	0.132	0.098	1.21509e-28	1	FP085414.1	IIa
magi1b	3.94344e-32	0.250827	0.182	0.147	6.79771e-28	1	magi1b	IIa
roraa	3.62448e-30	0.293218	0.134	0.102	6.24788e-26	1	roraa	IIa
sulf2b	3.81148e-29	0.293642	0.212	0.179	6.57022e-25	1	sulf2b	IIa
marcksa	3.74347e-26	0.279642	0.239	0.213	6.45299e-22	1	marcksa	IIa
nfil3	1.02852e-25	0.26044	0.125	0.098	1.77296e-21	1	nfil3	IIa
meis2a	1.42943e-23	0.290457	0.105	0.08	2.46406e-19	1	meis2a	IIa
gadd45ga	4.78629e-23	0.336343	0.126	0.1	8.25061e-19	1	gadd45ga	IIa
zfhx3	4.34161e-22	0.255041	0.203	0.175	7.48407e-18	1	zfhx3	IIa
si:dkey-112a7.4	2.13252e-18	0.259412	0.151	0.127	3.67603e-14	1	si:dkey-112a7.4	IIa
meis1b	3.19463e-17	0.394218	0.174	0.155	5.50691e-13	1	meis1b	IIa
nr2f2	9.95996e-17	0.345396	0.153	0.132	1.7169e-12	1	nr2f2	IIa
tenm3	1.7658e-15	0.277274	0.161	0.141	3.04389e-11	1	tenm3	IIa
tspan18b	1.71274e-13	0.260683	0.212	0.194	2.95243e-09	1	tspan18b	IIa
sox11a	1.10316e-11	0.287393	0.399	0.405	1.90162e-07	1	sox11a	IIa
pou3f1	1.59463e-08	0.396255	0.173	0.163	0.000274882	1	pou3f1	IIa
khdrbs1b	2.06477e-06	0.275764	0.177	0.173	0.0355925	1	khdrbs1b	IIa
gad1b1	0	2.11306	0.575	0.079	0	2	gad1b	IIb
gad21	0	1.93049	0.612	0.098	0	2	gad2	IIb
otpa1	0	1.74094	0.162	0.048	0	2	otpa	IIb
slc32a11	0	1.58376	0.436	0.052	0	2	slc32a1	IIb
tal11	0	1.57755	0.26	0.052	0	2	tal1	IIb
otpb	0	1.53172	0.109	0.025	0	2	otpb	IIb
slc6a1b1	0	1.32893	0.59	0.175	0	2	slc6a1b	IIb
dlx5a1	0	1.13003	0.159	0.024	0	2	dlx5a	IIb
gata31	0	1.0851	0.167	0.021	0	2	gata3	IIb
dlx2a	0	1.01944	0.129	0.024	0	2	dlx2a	IIb
si:dkey-175g6.2	0	0.976666	0.157	0.013	0	2	si:dkey-175g6.2	IIb
lhx1a1	0	0.852403	0.248	0.079	0	2	lhx1a	IIb
atp1b1b	0	0.83268	0.383	0.171	0	2	atp1b1b	IIb
nxph11	0	0.783109	0.172	0.053	0	2	nxph1	IIb
slc6a1a	0	0.677723	0.326	0.141	0	2	slc6a1a	IIb
SYNPR	0	0.643089	0.105	0.02	0	2	SYNPR	IIb
atp1a3a	0	0.558458	0.591	0.374	0	2	atp1a3a	IIb
fndc4b	0	0.544666	0.396	0.218	0	2	fndc4b	IIb
elavl4	0	0.513196	0.785	0.583	0	2	elavl4	IIb
spock3	0	0.495092	0.538	0.349	0	2	spock3	IIb
eno1a	0	0.48334	0.686	0.529	0	2	eno1a	IIb
scg5	0	0.436344	0.634	0.443	0	2	scg5	IIb
atp6v1b2	0	0.434106	0.574	0.386	0	2	atp6v1b2	IIb
aldocb	0	0.433713	0.816	0.661	0	2	aldocb	IIb
atp6v0cb	0	0.427798	0.895	0.713	0	2	atp6v0cb	IIb
nsfa	0	0.425489	0.654	0.452	0	2	nsfa	IIb
atp6ap2	0	0.419055	0.7	0.535	0	2	atp6ap2	IIb
npas4a	0	0.414512	0.612	0.437	0	2	npas4a	IIb
tmsb21	0	0.406244	0.845	0.685	0	2	tmsb2	IIb
atp1b2a	0	0.404117	0.611	0.449	0	2	atp1b2a	IIb
tpi1b	0	0.397132	0.67	0.535	0	2	tpi1b	IIb
atpv0e2	0	0.385452	0.845	0.674	0	2	atpv0e2	IIb
snap25b1	0	0.382734	0.623	0.458	0	2	snap25b	IIb
atp6v1g1	0	0.369495	0.825	0.703	0	2	atp6v1g1	IIb
cbx1b1	0	0.368768	0.756	0.611	0	2	cbx1b	IIb
atp6v1e1b	0	0.363667	0.716	0.561	0	2	atp6v1e1b	IIb
snap25a1	0	0.360857	0.86	0.685	0	2	snap25a	IIb
nsg21	0	0.356377	0.808	0.651	0	2	nsg2	IIb
vamp2	1.77424e-292	0.377533	0.563	0.391	3.05844e-288	2	vamp2	IIb
egr4	1.12194e-291	0.382528	0.655	0.514	1.93401e-287	2	egr4	IIb
smdt1a	2.56286e-291	0.4572	0.412	0.252	4.41786e-287	2	smdt1a	IIb
cplx2l	2.31255e-288	0.4656	0.54	0.381	3.98637e-284	2	cplx2l	IIb
clta	3.40008e-288	0.384672	0.642	0.521	5.86106e-284	2	clta	IIb
tob1a	1.18558e-276	0.273632	0.761	0.627	2.04371e-272	2	tob1a	IIb
cox6b1	1.1009e-272	0.485251	0.493	0.35	1.89773e-268	2	cox6b1	IIb
tmem59l1	1.35992e-272	0.281982	0.743	0.585	2.34424e-268	2	tmem59l	IIb
cox7a2a	1.99874e-272	0.31544	0.767	0.698	3.44542e-268	2	cox7a2a	IIb
rasd4	6.85781e-267	0.6734	0.262	0.136	1.18215e-262	2	rasd4	IIb
slc35g2a	8.30913e-267	0.470414	0.424	0.271	1.43233e-262	2	slc35g2a	IIb
stx1b	2.1205e-266	0.319742	0.662	0.501	3.65532e-262	2	stx1b	IIb
cpe	6.77251e-263	0.287032	0.694	0.522	1.16745e-258	2	cpe	IIb
syngr3a	2.92099e-251	0.433747	0.362	0.217	5.0352e-247	2	syngr3a	IIb
six3a	1.44647e-246	0.785725	0.101	0.028	2.49343e-242	2	six3a	IIb
emx2	7.15411e-244	0.806406	0.116	0.037	1.23323e-239	2	emx2	IIb
mtbl	3.77432e-241	0.403166	0.56	0.437	6.50618e-237	2	mtbl	IIb
si:ch73-119p20.1	4.33282e-238	0.407128	0.422	0.276	7.46892e-234	2	si:ch73-119p20.1	IIb
zgc:658941	9.06874e-237	0.285127	0.701	0.557	1.56327e-232	2	zgc:65894	IIb
atp5if1b	2.29705e-235	0.319318	0.702	0.602	3.95966e-231	2	atp5if1b	IIb
syngr3b	5.56663e-229	0.382186	0.453	0.304	9.59575e-225	2	syngr3b	IIb
vgf	1.50368e-223	0.50024	0.219	0.108	2.59205e-219	2	vgf	IIb
CABZ01102528.1	1.59886e-222	0.438657	0.202	0.096	2.75611e-218	2	CABZ01102528.1	IIb
ndufa4	3.1546e-218	0.40681	0.421	0.282	5.4379e-214	2	ndufa4	IIb
nrxn3a	1.91544e-216	0.464613	0.128	0.047	3.30183e-212	2	nrxn3a	IIb
gpia	4.32616e-215	0.403822	0.47	0.344	7.45743e-211	2	gpia	IIb
COX5B	6.65045e-213	0.264349	0.818	0.784	1.14641e-208	2	COX5B	IIb
eef1a1a	1.38054e-209	0.40419	0.397	0.265	2.37978e-205	2	eef1a1a	IIb
atp6v0d1	1.81353e-208	0.334647	0.53	0.396	3.12616e-204	2	atp6v0d1	IIb
si:ch211-195b13.1	1.88325e-208	0.375114	0.41	0.273	3.24635e-204	2	si:ch211-195b13.1	IIb
necap1	2.96154e-208	0.363495	0.465	0.329	5.1051e-204	2	necap1	IIb
pkma	3.82136e-207	0.384354	0.504	0.381	6.58726e-203	2	pkma	IIb
rgs16	4.1637e-207	0.505978	0.24	0.129	7.17739e-203	2	rgs16	IIb
scg2b1	2.51794e-205	0.344701	0.591	0.448	4.34043e-201	2	scg2b	IIb
lhfpl3	2.91165e-199	0.388315	0.367	0.236	5.0191e-195	2	lhfpl3	IIb
zgc:122979	5.96007e-199	0.408681	0.519	0.386	1.0274e-194	2	zgc:122979	IIb
lhx5	3.2158e-197	0.470486	0.13	0.052	5.5434e-193	2	lhx5	IIb
nrsn1	3.37337e-195	0.404211	0.348	0.223	5.81502e-191	2	nrsn1	IIb
si:dkeyp-75h12.5	6.67067e-195	0.276128	0.671	0.568	1.14989e-190	2	si:dkeyp-75h12.5	IIb
sv2a	3.27494e-192	0.385251	0.403	0.274	5.64534e-188	2	sv2a	IIb
dynll2a	1.72645e-191	0.408342	0.403	0.282	2.97606e-187	2	dynll2a	IIb
aldoaa	1.0947e-189	0.316186	0.648	0.571	1.88705e-185	2	aldoaa	IIb
palm1b	1.73285e-185	0.310155	0.549	0.421	2.98709e-181	2	palm1b	IIb
atp6v0b	1.34442e-184	0.328845	0.502	0.378	2.3175e-180	2	atp6v0b	IIb
id41	1.51521e-184	0.354317	0.462	0.33	2.61193e-180	2	id4	IIb
gabarapl2	2.01826e-180	0.276738	0.654	0.553	3.47907e-176	2	gabarapl2	IIb
cox6a1	6.27194e-180	0.259306	0.76	0.718	1.08116e-175	2	cox6a1	IIb
syn2a	5.08621e-177	0.305122	0.466	0.332	8.76762e-173	2	syn2a	IIb
atp5mc1	1.84423e-176	0.263687	0.727	0.669	3.17909e-172	2	atp5mc1	IIb
atp6v1c1a	3.0476e-171	0.343893	0.421	0.299	5.25345e-167	2	atp6v1c1a	IIb
syt4	1.13648e-169	0.351519	0.444	0.322	1.95906e-165	2	syt4	IIb
syt1a	2.90169e-169	0.361222	0.495	0.374	5.00193e-165	2	syt1a	IIb
stxbp1a	8.65435e-168	0.323878	0.483	0.356	1.49184e-163	2	stxbp1a	IIb
pgk1	1.76193e-165	0.375204	0.447	0.337	3.03722e-161	2	pgk1	IIb
si:ch211-235e9.8	1.09134e-163	0.394568	0.336	0.226	1.88125e-159	2	si:ch211-235e9.8	IIb
camk1db	4.15778e-163	0.475819	0.176	0.09	7.16718e-159	2	camk1db	IIb
rogdi	6.54855e-162	0.350438	0.406	0.29	1.12884e-157	2	rogdi	IIb
cox6c	1.62475e-161	0.278514	0.707	0.664	2.80075e-157	2	cox6c	IIb
serpini11	9.98229e-160	0.296339	0.405	0.278	1.72075e-155	2	serpini1	IIb
kcnip1b	1.21856e-158	0.510941	0.317	0.211	2.10056e-154	2	kcnip1b	IIb
dpysl5b	9.3114e-157	0.313889	0.506	0.389	1.6051e-152	2	dpysl5b	IIb
tmem178b	2.40867e-155	0.323633	0.313	0.203	4.15206e-151	2	tmem178b	IIb
lin7b	9.23413e-151	0.36157	0.338	0.23	1.59178e-146	2	lin7b	IIb
map1aa	8.47214e-150	0.278469	0.483	0.36	1.46043e-145	2	map1aa	IIb
fam49al1	4.63606e-147	0.303108	0.487	0.373	7.99164e-143	2	fam49al	IIb
plcxd3	9.61031e-144	0.420191	0.216	0.126	1.65662e-139	2	plcxd3	IIb
cdk5r2a1	4.89206e-143	0.272375	0.481	0.359	8.43293e-139	2	cdk5r2a	IIb
atp6v1h	1.81212e-139	0.30154	0.452	0.342	3.12374e-135	2	atp6v1h	IIb
eno2	8.94e-139	0.301108	0.37	0.256	1.54108e-134	2	eno2	IIb
hpcal41	8.67589e-137	0.269999	0.186	0.102	1.49555e-132	2	hpcal4	IIb
si:ch1073-111c8.3	1.48093e-136	0.377769	0.157	0.081	2.55282e-132	2	si:ch1073-111c8.3	IIb
si:dkey-7j14.51	1.16616e-134	0.262426	0.482	0.363	2.01023e-130	2	si:dkey-7j14.5	IIb
calm2a1	5.71389e-132	0.263789	0.461	0.352	9.84961e-128	2	calm2a	IIb
pclob	4.69536e-130	0.359378	0.218	0.131	8.09387e-126	2	pclob	IIb
ckmt1	1.62063e-128	0.318607	0.397	0.292	2.79363e-124	2	ckmt1	IIb
si:dkey-33c12.31	4.93605e-127	0.410265	0.228	0.14	8.50877e-123	2	si:dkey-33c12.3	IIb
rab3b	6.42801e-127	0.334988	0.21	0.125	1.10806e-122	2	rab3b	IIb
uncx	2.29116e-126	0.449017	0.101	0.044	3.9495e-122	2	uncx	IIb
amph	1.85675e-125	0.295095	0.314	0.212	3.20067e-121	2	amph	IIb
rab6bb	7.45222e-125	0.297109	0.38	0.277	1.28461e-120	2	rab6bb	IIb
gas7a	6.51414e-124	0.282807	0.357	0.25	1.12291e-119	2	gas7a	IIb
fxyd6	7.09654e-124	0.340034	0.155	0.083	1.2233e-119	2	fxyd6	IIb
lmo1	1.30792e-122	0.470467	0.235	0.151	2.25459e-118	2	lmo1	IIb
si:dkeyp-69c1.7	1.75258e-120	0.332708	0.136	0.069	3.0211e-116	2	si:dkeyp-69c1.7	IIb
myrip	2.73517e-120	0.344482	0.137	0.07	4.71489e-116	2	myrip	IIb
adcyap1r1a	4.07853e-120	0.348279	0.21	0.128	7.03057e-116	2	adcyap1r1a	IIb
ndrg2	3.05457e-119	0.382244	0.439	0.357	5.26546e-115	2	ndrg2	IIb
map4l	2.05396e-116	0.276458	0.425	0.322	3.54061e-112	2	map4l	IIb
bhlhe41	1.80447e-114	0.408997	0.371	0.283	3.11054e-110	2	bhlhe41	IIb
cadm4	2.75812e-114	0.306083	0.309	0.219	4.75444e-110	2	cadm4	IIb
celf4	5.28976e-114	0.324993	0.25	0.163	9.11848e-110	2	celf4	IIb
kif5aa	3.978e-113	0.302669	0.325	0.23	6.85727e-109	2	kif5aa	IIb
fstl5	4.7915e-113	0.327513	0.184	0.108	8.2596e-109	2	fstl5	IIb
uchl11	3.44445e-111	0.309834	0.366	0.271	5.93754e-107	2	uchl1	IIb
si:ch211-195b15.8	1.07763e-109	0.261303	0.471	0.37	1.85761e-105	2	si:ch211-195b15.8	IIb
rcan3	5.5292e-109	0.305579	0.177	0.103	9.53124e-105	2	rcan3	IIb
cycsb	1.30787e-107	0.273294	0.626	0.582	2.25451e-103	2	cycsb	IIb
slc2a3a	2.83066e-106	0.290186	0.2	0.123	4.87948e-102	2	slc2a3a	IIb
gpr137bb	7.6424e-105	0.279388	0.291	0.2	1.3174e-100	2	gpr137bb	IIb
ap2s1	9.72604e-105	0.270391	0.473	0.391	1.67657e-100	2	ap2s1	IIb
zgc:162989	9.30049e-102	0.293019	0.195	0.121	1.60322e-97	2	zgc:162989	IIb
atp2b3b	3.19187e-101	0.285918	0.243	0.161	5.50215e-97	2	atp2b3b	IIb
map1ab	1.47731e-100	0.333164	0.303	0.22	2.54659e-96	2	map1ab	IIb
zgc:77056	1.39626e-99	0.320189	0.313	0.232	2.40687e-95	2	zgc:77056	IIb
grin1b1	1.50523e-99	0.258814	0.332	0.238	2.59471e-95	2	grin1b	IIb
cplx2	1.72615e-99	0.351744	0.216	0.14	2.97553e-95	2	cplx2	IIb
stmn4l	2.997e-99	0.324061	0.285	0.2	5.16624e-95	2	stmn4l	IIb
cdipt	1.87497e-97	0.308575	0.323	0.239	3.23208e-93	2	cdipt	IIb
eef2l2	1.04917e-96	0.30746	0.165	0.098	1.80856e-92	2	eef2l2	IIb
sdhb	1.2169e-96	0.325247	0.403	0.33	2.0977e-92	2	sdhb	IIb
clstn3	3.46452e-96	0.264743	0.321	0.231	5.97214e-92	2	clstn3	IIb
atp6v1f	3.15414e-94	0.26518	0.305	0.22	5.43711e-90	2	atp6v1f	IIb
gnai1	1.89771e-93	0.302767	0.368	0.287	3.27127e-89	2	gnai1	IIb
pfkpa	2.01421e-93	0.280346	0.209	0.135	3.4721e-89	2	pfkpa	IIb
rgs5b	1.60547e-92	0.503753	0.167	0.103	2.76751e-88	2	rgs5b	IIb
cox8b	4.24191e-91	0.4174	0.153	0.092	7.3122e-87	2	cox8b	IIb
qdpra	6.86539e-91	0.366545	0.127	0.071	1.18346e-86	2	qdpra	IIb
rrad	3.05634e-89	0.421479	0.109	0.058	5.26853e-85	2	rrad	IIb
plk2b	4.82383e-89	0.360845	0.186	0.119	8.31532e-85	2	plk2b	IIb
necab1	2.10563e-86	0.3461	0.165	0.102	3.62969e-82	2	necab1	IIb
myl6	2.4193e-86	0.255622	0.462	0.39	4.17039e-82	2	myl6	IIb
ap3s2	9.79495e-86	0.260723	0.439	0.367	1.68845e-81	2	ap3s2	IIb
cacng8a	8.07013e-85	0.300733	0.178	0.113	1.39113e-80	2	cacng8a	IIb
mapre3b	1.11226e-83	0.266574	0.319	0.24	1.91732e-79	2	mapre3b	IIb
pnpo	2.091e-83	0.309271	0.193	0.128	3.60447e-79	2	pnpo	IIb
arhgef9b	2.20929e-81	0.270148	0.196	0.129	3.80837e-77	2	arhgef9b	IIb
plk3	3.96108e-79	0.329324	0.282	0.209	6.82811e-75	2	plk3	IIb
elmod1	4.40979e-79	0.250795	0.34	0.259	7.60159e-75	2	elmod1	IIb
ache	4.46141e-79	0.277331	0.162	0.101	7.69058e-75	2	ache	IIb
gb:bc139872	2.58669e-78	0.267617	0.271	0.198	4.45893e-74	2	gb:bc139872	IIb
SNAP91 (1 of many)	5.04699e-78	0.257031	0.22	0.15	8.7e-74	2	SNAP91 (1 of many)	IIb
zgc:194678	7.88163e-77	0.284441	0.135	0.081	1.35863e-72	2	zgc:194678	IIb
pkib	1.57839e-76	0.256062	0.34	0.262	2.72082e-72	2	pkib	IIb
map1lc3a	3.90203e-76	0.255292	0.346	0.272	6.72632e-72	2	map1lc3a	IIb
glipr1b	1.38495e-75	0.30053	0.189	0.126	2.38738e-71	2	glipr1b	IIb
stx12l	1.16451e-74	0.251668	0.143	0.088	2.00739e-70	2	stx12l	IIb
msi2b	1.1723e-74	0.345933	0.236	0.171	2.0208e-70	2	msi2b	IIb
BX470182.11	2.09156e-74	0.362513	0.183	0.121	3.60544e-70	2	BX470182.1	IIb
ptprna	3.82803e-74	0.31484	0.202	0.14	6.59875e-70	2	ptprna	IIb
cbx3b1	1.03764e-72	0.356854	0.266	0.205	1.78868e-68	2	cbx3b	IIb
tspan3b	2.02002e-72	0.260664	0.238	0.17	3.48211e-68	2	tspan3b	IIb
smu1b1	9.762e-71	0.307603	0.208	0.144	1.68277e-66	2	smu1b	IIb
edil3a	1.14571e-69	0.290375	0.232	0.165	1.97497e-65	2	edil3a	IIb
ctbp2a	2.92415e-69	0.264583	0.27	0.203	5.04065e-65	2	ctbp2a	IIb
BX005003.1	8.00213e-69	0.281331	0.275	0.203	1.37941e-64	2	BX005003.1	IIb
pik3r1	1.57038e-67	0.266368	0.355	0.29	2.70702e-63	2	pik3r1	IIb
prkab1a	4.09143e-67	0.275885	0.319	0.254	7.05281e-63	2	prkab1a	IIb
msi2a	2.70841e-66	0.359345	0.109	0.064	4.66876e-62	2	msi2a	IIb
baalcb	3.97396e-66	0.254875	0.17	0.113	6.85032e-62	2	baalcb	IIb
cacng8b	3.5029e-64	0.255993	0.155	0.101	6.03829e-60	2	cacng8b	IIb
oaz2b	1.29321e-63	0.257352	0.198	0.137	2.22924e-59	2	oaz2b	IIb
hk1	1.01081e-62	0.290993	0.19	0.135	1.74244e-58	2	hk1	IIb
clstn2	7.59916e-62	0.290289	0.12	0.074	1.30994e-57	2	clstn2	IIb
gchfr	1.41714e-61	0.324647	0.242	0.185	2.44286e-57	2	gchfr	IIb
tmem9b	7.12641e-61	0.250267	0.294	0.231	1.22845e-56	2	tmem9b	IIb
ndufa2	2.83904e-60	0.25056	0.429	0.38	4.89394e-56	2	ndufa2	IIb
zfhx31	3.48066e-57	0.26545	0.226	0.168	5.99997e-53	2	zfhx3	IIb
si:dkey-16p21.8	4.77697e-57	0.279815	0.14	0.093	8.23455e-53	2	si:dkey-16p21.8	IIb
lrrtm2	1.08461e-56	0.267518	0.185	0.131	1.86965e-52	2	lrrtm2	IIb
aplp2	1.71403e-55	0.275312	0.219	0.163	2.95465e-51	2	aplp2	IIb
fosb	5.42949e-55	0.286941	0.369	0.309	9.35935e-51	2	fosb	IIb
ldha	2.27088e-54	0.280521	0.248	0.193	3.91454e-50	2	ldha	IIb
myca	6.68844e-53	0.277877	0.308	0.252	1.15295e-48	2	myca	IIb
arpc5b	3.71824e-52	0.254274	0.256	0.201	6.40951e-48	2	arpc5b	IIb
zfhx4	1.79497e-51	0.269983	0.245	0.189	3.09417e-47	2	zfhx4	IIb
cygb2	1.83301e-42	0.254446	0.111	0.074	3.15975e-38	2	cygb2	IIb
fam84a	1.19287e-41	0.270006	0.136	0.096	2.05627e-37	2	fam84a	IIb
pbx1a	7.22368e-39	0.269301	0.282	0.234	1.24522e-34	2	pbx1a	IIb
zgc:123105	4.69261e-35	0.27324	0.209	0.17	8.08912e-31	2	zgc:123105	IIb
pvalb6	4.69601e-33	0.296943	0.171	0.132	8.09498e-29	2	pvalb6	IIb
cxcl141	9.78101e-13	0.604001	0.116	0.099	1.68605e-08	2	cxcl14	IIb
her15.22	0	2.61077	0.773	0.204	0	3	her15.2	III
hmgb2a2	0	2.60244	0.814	0.286	0	3	hmgb2a	III
abhd6a2	0	2.58252	0.414	0.069	0	3	abhd6a	III
her15.12	0	2.57814	0.765	0.184	0	3	her15.1	III
her4.22	0	2.51914	0.767	0.295	0	3	her4.2	III
her122	0	2.40506	0.465	0.061	0	3	her12	III
her4.42	0	2.38979	0.692	0.163	0	3	her4.4	III
her4.12	0	2.12093	0.73	0.26	0	3	her4.1	III
her22	0	1.87971	0.451	0.042	0	3	her2	III
rrm22	0	1.86224	0.36	0.041	0	3	rrm2	III
her4.32	0	1.84542	0.593	0.096	0	3	her4.3	III
si:ch211-251b21.12	0	1.84064	0.515	0.126	0	3	si:ch211-251b21.1	III
stmn1a2	0	1.8284	0.631	0.128	0	3	stmn1a	III
mdka2	0	1.79547	0.625	0.142	0	3	mdka	III
hmga1a2	0	1.78747	0.907	0.482	0	3	hmga1a	III
pcna2	0	1.73067	0.463	0.097	0	3	pcna	III
dla2	0	1.67026	0.475	0.022	0	3	dla	III
her62	0	1.5694	0.497	0.093	0	3	her6	III
si:ch73-21g5.7	0	1.56319	0.296	0.019	0	3	si:ch73-21g5.7	III
tuba8l2	0	1.51721	0.414	0.039	0	3	tuba8l	III
ccnd12	0	1.49413	0.428	0.032	0	3	ccnd1	III
hmgb2b2	0	1.45101	0.907	0.603	0	3	hmgb2b	III
hells2	0	1.44334	0.376	0.026	0	3	hells	III
eef1da2	0	1.4213	0.596	0.099	0	3	eef1da	III
npm1a2	0	1.40277	0.49	0.086	0	3	npm1a	III
lfng2	0	1.37985	0.539	0.078	0	3	lfng	III
her92	0	1.32799	0.438	0.069	0	3	her9	III
fabp7a2	0	1.32514	0.859	0.523	0	3	fabp7a	III
id12	0	1.32267	0.544	0.173	0	3	id1	III
DUT2	0	1.30084	0.345	0.038	0	3	DUT	III
hspb12	0	1.28318	0.238	0.063	0	3	hspb1	III
rpl22l12	0	1.26626	0.892	0.458	0	3	rpl22l1	III
ahcy2	0	1.2653	0.445	0.039	0	3	ahcy	III
cdca7a	0	1.25552	0.309	0.019	0	3	cdca7a	III
cebpd2	0	1.25492	0.443	0.103	0	3	cebpd	III
eef1b22	0	1.2427	0.954	0.565	0	3	eef1b2	III
sox32	0	1.23481	0.466	0.062	0	3	sox3	III
nusap1	0	1.21314	0.212	0.011	0	3	nusap1	III
socs3b2	0	1.21296	0.386	0.056	0	3	socs3b	III
sb:cb812	0	1.20499	0.327	0.029	0	3	sb:cb81	III
msi12	0	1.197	0.498	0.044	0	3	msi1	III
zgc:110540	0	1.16987	0.272	0.013	0	3	zgc:110540	III
rpl122	0	1.16297	0.973	0.769	0	3	rpl12	III
selenoh2	0	1.15503	0.469	0.085	0	3	selenoh	III
rps26l2	0	1.13211	0.961	0.716	0	3	rps26l	III
nutf2l2	0	1.12941	0.383	0.022	0	3	nutf2l	III
rps3a2	0	1.12274	0.986	0.83	0	3	rps3a	III
cdk1	0	1.11987	0.223	0.01	0	3	cdk1	III
rps8a2	0	1.11916	0.985	0.817	0	3	rps8a	III
ube2c	0	1.10946	0.203	0.013	0	3	ube2c	III
rpl102	0	1.10127	0.985	0.848	0	3	rpl10	III
rps172	0	1.08596	0.908	0.484	0	3	rps17	III
ccna2	0	1.07183	0.259	0.011	0	3	ccna2	III
rps27a2	0	1.06768	0.986	0.835	0	3	rps27a	III
rpl62	0	1.06649	0.968	0.731	0	3	rpl6	III
eif5a3	0	1.06431	0.864	0.456	0	3	eif5a	III
msna2	0	1.05761	0.386	0.049	0	3	msna	III
sdc42	0	1.05376	0.516	0.096	0	3	sdc4	III
rpl10a2	0	1.0526	0.98	0.823	0	3	rpl10a	III
rps112	0	1.04645	0.978	0.79	0	3	rps11	III
rps242	0	1.04516	0.982	0.812	0	3	rps24	III
eif4ebp3l2	0	1.04333	0.348	0.044	0	3	eif4ebp3l	III
si:ch211-69g19.2	0	1.04089	0.146	0.009	0	3	si:ch211-69g19.2	III
rpl23a2	0	1.03381	0.95	0.688	0	3	rpl23a	III
lbr2	0	1.03302	0.353	0.048	0	3	lbr	III
si:ch211-156b7.42	0	1.02746	0.397	0.055	0	3	si:ch211-156b7.4	III
rps142	0	1.02196	0.981	0.826	0	3	rps14	III
mki67	0	1.01845	0.248	0.009	0	3	mki67	III
pbxip1b	0	1.01624	0.133	0.027	0	3	pbxip1b	III
rps101	0	1.01409	0.966	0.738	0	3	rps10	III
tuba8l42	0	1.00319	0.585	0.218	0	3	tuba8l4	III
zgc:1654612	0	1.00146	0.426	0.09	0	3	zgc:165461	III
rps232	0	1	0.972	0.793	0	3	rps23	III
mcm3	0	0.999845	0.288	0.016	0	3	mcm3	III
im:71523482	0	0.997407	0.327	0.034	0	3	im:7152348	III
ak22	0	0.996114	0.511	0.101	0	3	ak2	III
dbx1a	0	0.989509	0.116	0.011	0	3	dbx1a	III
rpl42	0	0.989387	0.913	0.57	0	3	rpl4	III
rpl211	0	0.98032	0.98	0.838	0	3	rpl21	III
rpl5a2	0	0.976255	0.828	0.431	0	3	rpl5a	III
rps251	0	0.975987	0.97	0.743	0	3	rps25	III
mcm2	0	0.975975	0.279	0.017	0	3	mcm2	III
rack11	0	0.975178	0.969	0.755	0	3	rack1	III
rpl261	0	0.974644	0.945	0.688	0	3	rpl26	III
nop582	0	0.967923	0.427	0.084	0	3	nop58	III
fbl2	0	0.964885	0.42	0.078	0	3	fbl	III
ascl1a	0	0.961581	0.244	0.022	0	3	ascl1a	III
ucp22	0	0.957542	0.364	0.057	0	3	ucp2	III
rpl91	0	0.957234	0.977	0.799	0	3	rpl9	III
metrn1	0	0.94363	0.303	0.028	0	3	metrn	III
chaf1a	0	0.94235	0.294	0.012	0	3	chaf1a	III
eef2b1	0	0.942082	0.887	0.484	0	3	eef2b	III
sinhcafl1	0	0.936856	0.504	0.12	0	3	sinhcafl	III
ran1	0	0.934748	0.92	0.604	0	3	ran	III
rps31	0	0.934365	0.97	0.774	0	3	rps3	III
notch31	0	0.932545	0.319	0.028	0	3	notch3	III
uba521	0	0.930737	0.895	0.53	0	3	uba52	III
dlb	0	0.92997	0.244	0.018	0	3	dlb	III
banf12	0	0.929135	0.46	0.142	0	3	banf1	III
rpl171	0	0.926565	0.98	0.819	0	3	rpl17	III
boc	0	0.924977	0.297	0.022	0	3	boc	III
kpna2	0	0.920192	0.141	0.01	0	3	kpna2	III
eef1g1	0	0.918381	0.955	0.705	0	3	eef1g	III
tpt11	0	0.915212	0.986	0.827	0	3	tpt1	III
neurog1	0	0.912169	0.107	0.014	0	3	neurog1	III
zgc:1141881	0	0.907795	0.982	0.819	0	3	zgc:114188	III
mcm6	0	0.907748	0.264	0.015	0	3	mcm6	III
rpl141	0	0.907065	0.874	0.489	0	3	rpl14	III
gas1b	0	0.906659	0.275	0.02	0	3	gas1b	III
lipg	0	0.902492	0.292	0.026	0	3	lipg	III
ppiaa1	0	0.900161	0.969	0.767	0	3	ppiaa	III
serbp1a1	0	0.897856	0.841	0.458	0	3	serbp1a	III
mcm5	0	0.897773	0.264	0.015	0	3	mcm5	III
eif5a22	0	0.894817	0.643	0.236	0	3	eif5a2	III
pclaf	0	0.892699	0.278	0.041	0	3	pclaf	III
nme2b.11	0	0.888492	0.984	0.82	0	3	nme2b.1	III
tspan72	0	0.884786	0.369	0.039	0	3	tspan7	III
her8.2	0	0.88214	0.23	0.027	0	3	her8.2	III
angptl42	0	0.870559	0.294	0.038	0	3	angptl4	III
rps151	0	0.870509	0.99	0.887	0	3	rps15	III
rpl311	0	0.870101	0.942	0.659	0	3	rpl31	III
top2a	0	0.862457	0.198	0.007	0	3	top2a	III
rpl13a1	0	0.857594	0.959	0.756	0	3	rpl13a	III
rpl241	0	0.852664	0.991	0.897	0	3	rpl24	III
adh51	0	0.846493	0.604	0.17	0	3	adh5	III
snu13b1	0	0.84471	0.482	0.15	0	3	snu13b	III
mibp	0	0.839249	0.221	0.013	0	3	mibp	III
nop562	0	0.838609	0.515	0.167	0	3	nop56	III
dnajb1b2	0	0.830655	0.893	0.484	0	3	dnajb1b	III
cks1b	0	0.829756	0.253	0.018	0	3	cks1b	III
ranbp11	0	0.829664	0.605	0.226	0	3	ranbp1	III
mcm4	0	0.819678	0.256	0.013	0	3	mcm4	III
rpl221	0	0.818466	0.981	0.82	0	3	rpl22	III
cdc25b	0	0.818127	0.215	0.012	0	3	cdc25b	III
rpl5b1	0	0.814699	0.916	0.646	0	3	rpl5b	III
mych2	0	0.80298	0.334	0.051	0	3	mych	III
ccng12	0	0.802034	0.555	0.134	0	3	ccng1	III
anp32b1	0	0.799003	0.548	0.196	0	3	anp32b	III
rtca2	0	0.796155	0.39	0.085	0	3	rtca	III
sox19a1	0	0.794888	0.288	0.028	0	3	sox19a	III
mad2l1	0	0.794256	0.206	0.01	0	3	mad2l1	III
chd72	0	0.793182	0.36	0.056	0	3	chd7	III
si:ch211-286b5.52	0	0.790103	0.401	0.069	0	3	si:ch211-286b5.5	III
dkc11	0	0.787123	0.322	0.045	0	3	dkc1	III
si:dkey-239h2.31	0	0.786916	0.305	0.075	0	3	si:dkey-239h2.3	III
prss35	0	0.7797	0.101	0.015	0	3	prss35	III
wls2	0	0.775499	0.323	0.057	0	3	wls	III
si:ch211-212k18.51	0	0.773358	0.284	0.025	0	3	si:ch211-212k18.5	III
rpa31	0	0.766539	0.338	0.068	0	3	rpa3	III
seta	0	0.765902	0.865	0.581	0	3	seta	III
insm1a1	0	0.760889	0.339	0.141	0	3	insm1a	III
si:ch73-281n10.21	0	0.753681	0.9	0.755	0	3	si:ch73-281n10.2	III
cirbpb1	0	0.752745	0.981	0.849	0	3	cirbpb	III
CR848047.12	0	0.74806	0.342	0.091	0	3	CR848047.1	III
si:ch211-66e2.5	0	0.735696	0.202	0.039	0	3	si:ch211-66e2.5	III
btf31	0	0.731706	0.927	0.668	0	3	btf3	III
si:dkey-56m19.51	0	0.730842	0.649	0.238	0	3	si:dkey-56m19.5	III
zgc:564932	0	0.729476	0.807	0.49	0	3	zgc:56493	III
asf1ba	0	0.728944	0.229	0.009	0	3	asf1ba	III
aspm	0	0.727981	0.142	0.006	0	3	aspm	III
zfp36l21	0	0.720554	0.239	0.036	0	3	zfp36l2	III
neurod4	0	0.716405	0.135	0.008	0	3	neurod4	III
notch1a	0	0.715725	0.227	0.014	0	3	notch1a	III
id32	0	0.714656	0.287	0.075	0	3	id3	III
aurkb	0	0.711122	0.199	0.009	0	3	aurkb	III
snrpf	0	0.705856	0.643	0.273	0	3	snrpf	III
lig1	0	0.703765	0.274	0.04	0	3	lig1	III
rsl1d1	0	0.70326	0.319	0.06	0	3	rsl1d1	III
ppp1r14bb2	0	0.701019	0.308	0.053	0	3	ppp1r14bb	III
aldob	0	0.700165	0.226	0.03	0	3	aldob	III
tfdp2	0	0.697079	0.239	0.02	0	3	tfdp2	III
s1pr12	0	0.695972	0.303	0.066	0	3	s1pr1	III
slc25a55a1	0	0.695344	0.436	0.11	0	3	slc25a55a	III
mcl1b2	0	0.694247	0.454	0.131	0	3	mcl1b	III
cdkn1a	0	0.693587	0.242	0.026	0	3	cdkn1a	III
gng51	0	0.691714	0.483	0.133	0	3	gng5	III
atp1b42	0	0.683052	0.432	0.087	0	3	atp1b4	III
nsa21	0	0.682925	0.842	0.505	0	3	nsa2	III
CR751602.2	0	0.679819	0.18	0.037	0	3	CR751602.2	III
rsl24d1	0	0.676521	0.842	0.547	0	3	rsl24d1	III
nop10	0	0.669296	0.524	0.225	0	3	nop10	III
gas1a	0	0.668804	0.213	0.019	0	3	gas1a	III
myl9b1	0	0.665203	0.245	0.035	0	3	myl9b	III
h2afx	0	0.664299	0.363	0.13	0	3	h2afx	III
2021-09-12	0	0.66392	0.269	0.024	0	3	2021-09-12	III
dusp1	0	0.659877	0.254	0.024	0	3	dusp1	III
fads21	0	0.659518	0.264	0.035	0	3	fads2	III
kif11	0	0.655925	0.135	0.003	0	3	kif11	III
h2afvb	0	0.655809	0.871	0.693	0	3	h2afvb	III
eif3ea	0	0.647029	0.678	0.3	0	3	eif3ea	III
dlgap5	0	0.64023	0.172	0.003	0	3	dlgap5	III
cyp26b1	0	0.633722	0.132	0.027	0	3	cyp26b1	III
snrpg	0	0.631611	0.619	0.271	0	3	snrpg	III
nrarpa	0	0.629615	0.253	0.03	0	3	nrarpa	III
ddx21	0	0.629453	0.4	0.109	0	3	ddx21	III
pno1	0	0.629339	0.44	0.136	0	3	pno1	III
mibp2	0	0.627723	0.895	0.656	0	3	mibp2	III
fen1	0	0.624803	0.27	0.045	0	3	fen1	III
rpa2	0	0.623265	0.303	0.071	0	3	rpa2	III
ascl1b	0	0.62316	0.165	0.016	0	3	ascl1b	III
eif4a1a	0	0.622776	0.645	0.3	0	3	eif4a1a	III
spry22	0	0.622693	0.275	0.053	0	3	spry2	III
cenpf	0	0.620828	0.137	0.004	0	3	cenpf	III
eif1axa	0	0.620306	0.281	0.037	0	3	eif1axa	III
eif3ba	0	0.618892	0.641	0.288	0	3	eif3ba	III
cdk2	0	0.617386	0.227	0.011	0	3	cdk2	III
prdx21	0	0.616889	0.834	0.464	0	3	prdx2	III
ewsr1b1	0	0.616158	0.55	0.188	0	3	ewsr1b	III
rad21a	0	0.61472	0.568	0.239	0	3	rad21a	III
en2b1	0	0.614693	0.308	0.095	0	3	en2b	III
ebf2	0	0.613787	0.135	0.016	0	3	ebf2	III
rrm1	0	0.613337	0.212	0.015	0	3	rrm1	III
smc2	0	0.611948	0.191	0.005	0	3	smc2	III
plk1	0	0.611762	0.146	0.005	0	3	plk1	III
si:dkey-85k7.7	0	0.610967	0.195	0.043	0	3	si:dkey-85k7.7	III
ncl	0	0.609686	0.747	0.502	0	3	ncl	III
cx43.4	0	0.605465	0.27	0.037	0	3	cx43.4	III
lmnb2	0	0.604269	0.304	0.066	0	3	lmnb2	III
npm3	0	0.602917	0.394	0.103	0	3	npm3	III
CABZ01058261.1	0	0.602345	0.162	0.005	0	3	CABZ01058261.1	III
si:ch211-222l21.1	0	0.60221	0.918	0.833	0	3	si:ch211-222l21.1	III
dhfr	0	0.602153	0.217	0.016	0	3	dhfr	III
ssrp1a	0	0.600629	0.258	0.033	0	3	ssrp1a	III
rbbp4	0	0.60035	0.576	0.264	0	3	rbbp4	III
nfia1	0	0.599338	0.263	0.083	0	3	nfia	III
zgc:55461	0	0.595974	0.168	0.013	0	3	zgc:55461	III
gsta.1	0	0.593253	0.221	0.029	0	3	gsta.1	III
tpx2	0	0.589323	0.147	0.005	0	3	tpx2	III
uhrf1	0	0.589027	0.196	0.007	0	3	uhrf1	III
nhp2	0	0.588806	0.371	0.11	0	3	nhp2	III
atp1a1b2	0	0.588065	0.432	0.11	0	3	atp1a1b	III
eif4ebp32	0	0.587989	0.247	0.05	0	3	eif4ebp3	III
si:dkey-159f12.2	0	0.587905	0.334	0.07	0	3	si:dkey-159f12.2	III
cyr61	0	0.585532	0.149	0.024	0	3	cyr61	III
vamp32	0	0.581573	0.312	0.053	0	3	vamp3	III
COX7A2 (1 of many)	0	0.581174	0.234	0.019	0	3	COX7A2 (1 of many)	III
cdkn1ca	0	0.580388	0.201	0.056	0	3	cdkn1ca	III
zgc:114130	0	0.579653	0.176	0.007	0	3	zgc:114130	III
cnn2	0	0.578205	0.193	0.025	0	3	cnn2	III
si:ch211-288g17.3	0	0.577457	0.832	0.636	0	3	si:ch211-288g17.3	III
glulb2	0	0.577354	0.534	0.192	0	3	glulb	III
ncapg	0	0.576519	0.177	0.004	0	3	ncapg	III
jpt21	0	0.575944	0.308	0.063	0	3	jpt2	III
birc5a	0	0.572781	0.139	0.007	0	3	birc5a	III
sox11b	0	0.571682	0.597	0.287	0	3	sox11b	III
hes6	0	0.570318	0.508	0.237	0	3	hes6	III
BX465834.12	0	0.56978	0.676	0.39	0	3	BX465834.1	III
kifc1	0	0.569688	0.147	0.004	0	3	kifc1	III
rfc4	0	0.567134	0.239	0.032	0	3	rfc4	III
srsf1a	0	0.564654	0.43	0.132	0	3	srsf1a	III
zgc:158852	0	0.564011	0.222	0.032	0	3	zgc:158852	III
gins2	0	0.562275	0.195	0.011	0	3	gins2	III
atp1b1a2	0	0.561707	0.4	0.128	0	3	atp1b1a	III
cdc20	0	0.561092	0.123	0.012	0	3	cdc20	III
selenop2	0	0.559794	0.272	0.076	0	3	selenop	III
h2afva	0	0.559139	0.614	0.287	0	3	h2afva	III
eif3m	0	0.557159	0.78	0.438	0	3	eif3m	III
zgc:153115	0	0.555894	0.358	0.089	0	3	zgc:153115	III
cenpx	0	0.55334	0.243	0.03	0	3	cenpx	III
snrpe	0	0.552866	0.697	0.374	0	3	snrpe	III
rac1a2	0	0.55241	0.303	0.06	0	3	rac1a	III
nasp	0	0.551654	0.323	0.086	0	3	nasp	III
cd151l	0	0.549675	0.207	0.02	0	3	cd151l	III
ptbp1a	0	0.549013	0.234	0.02	0	3	ptbp1a	III
si:ch1073-303k11.2	0	0.543714	0.175	0.037	0	3	si:ch1073-303k11.2	III
si:ch211-114n24.6	0	0.543614	0.182	0.043	0	3	si:ch211-114n24.6	III
lmnb1	0	0.543084	0.342	0.092	0	3	lmnb1	III
suv39h1b	0	0.540941	0.181	0.005	0	3	suv39h1b	III
slc29a2	0	0.536981	0.142	0.003	0	3	slc29a2	III
snrpd1	0	0.536568	0.642	0.322	0	3	snrpd1	III
mak16	0	0.536296	0.301	0.066	0	3	mak16	III
eif2s3	0	0.533664	0.679	0.323	0	3	eif2s3	III
cirbpa	0	0.533046	0.944	0.807	0	3	cirbpa	III
fosl1a	0	0.532563	0.216	0.041	0	3	fosl1a	III
pa2g4b	0	0.532518	0.334	0.078	0	3	pa2g4b	III
ccnb1	0	0.532457	0.123	0.005	0	3	ccnb1	III
unga	0	0.531797	0.187	0.014	0	3	unga	III
eif3i	0	0.530726	0.594	0.257	0	3	eif3i	III
phgdh	0	0.529607	0.229	0.035	0	3	phgdh	III
flot1b2	0	0.527941	0.274	0.048	0	3	flot1b	III
CU467822.11	0	0.527793	0.494	0.206	0	3	CU467822.1	III
g3bp1	0	0.526695	0.352	0.092	0	3	g3bp1	III
syncrip	0	0.526475	0.767	0.439	0	3	syncrip	III
DNAJA41	0	0.526375	0.227	0.052	0	3	DNAJA4	III
si:dkey-7j14.6	0	0.525443	0.223	0.03	0	3	si:dkey-7j14.6	III
cnn3a	0	0.524751	0.221	0.028	0	3	cnn3a	III
slc25a25a1	0	0.523198	0.243	0.04	0	3	slc25a25a	III
tgif1	0	0.523163	0.449	0.146	0	3	tgif1	III
jam3b	0	0.519348	0.259	0.039	0	3	jam3b	III
wasf3b	0	0.516898	0.274	0.054	0	3	wasf3b	III
fkbp3	0	0.515116	0.468	0.168	0	3	fkbp3	III
apex1	0	0.507683	0.505	0.206	0	3	apex1	III
clic4	0	0.505712	0.315	0.066	0	3	clic4	III
nop53	0	0.504019	0.565	0.261	0	3	nop53	III
slbp	0	0.502859	0.219	0.042	0	3	slbp	III
eif3ha	0	0.500327	0.528	0.207	0	3	eif3ha	III
hnrnpabb	0	0.498515	0.886	0.629	0	3	hnrnpabb	III
lrig1	0	0.498203	0.183	0.018	0	3	lrig1	III
pa2g4a	0	0.495391	0.392	0.14	0	3	pa2g4a	III
mycla	0	0.494117	0.278	0.051	0	3	mycla	III
rhebl1	0	0.494048	0.264	0.05	0	3	rhebl1	III
zgc:1538671	0	0.49046	0.57	0.236	0	3	zgc:153867	III
cox4i22	0	0.490067	0.223	0.063	0	3	cox4i2	III
rrs1	0	0.488999	0.219	0.034	0	3	rrs1	III
perp	0	0.487418	0.205	0.027	0	3	perp	III
ppap2d	0	0.485704	0.157	0.029	0	3	ppap2d	III
tuba1c	0	0.485291	0.188	0.039	0	3	tuba1c	III
smc1al	0	0.484288	0.544	0.226	0	3	smc1al	III
fgfr3	0	0.483385	0.181	0.038	0	3	fgfr3	III
gtpbp4	0	0.483293	0.619	0.328	0	3	gtpbp4	III
eif6	0	0.482889	0.306	0.081	0	3	eif6	III
gnaia	0	0.482534	0.203	0.019	0	3	gnaia	III
sumo3b	0	0.48239	0.666	0.409	0	3	sumo3b	III
cnbpa	0	0.481844	0.714	0.448	0	3	cnbpa	III
ppm1g	0	0.480558	0.424	0.147	0	3	ppm1g	III
ddx39ab	0	0.477501	0.565	0.255	0	3	ddx39ab	III
spc25	0	0.477445	0.168	0.007	0	3	spc25	III
pprc1	0	0.476841	0.175	0.014	0	3	pprc1	III
cdca8	0	0.476245	0.135	0.004	0	3	cdca8	III
phc2a	0	0.475837	0.317	0.085	0	3	phc2a	III
eif3k	0	0.474449	0.536	0.229	0	3	eif3k	III
plpp3	0	0.473865	0.206	0.03	0	3	plpp3	III
prim2	0	0.473254	0.202	0.024	0	3	prim2	III
btg3	0	0.473168	0.348	0.101	0	3	btg3	III
zfp36l1b	0	0.472807	0.195	0.036	0	3	zfp36l1b	III
si:ch211-15b10.6	0	0.470227	0.216	0.041	0	3	si:ch211-15b10.6	III
cd82a2	0	0.46949	0.333	0.063	0	3	cd82a	III
cd632	0	0.469209	0.443	0.139	0	3	cd63	III
yap1	0	0.468234	0.181	0.02	0	3	yap1	III
smarca5	0	0.466332	0.292	0.069	0	3	smarca5	III
rfc5	0	0.464268	0.261	0.054	0	3	rfc5	III
socs3a	0	0.463904	0.144	0.031	0	3	socs3a	III
g2e3	0	0.463072	0.11	0.003	0	3	g2e3	III
fgfr2	0	0.463069	0.179	0.023	0	3	fgfr2	III
kif22	0	0.460788	0.167	0.016	0	3	kif22	III
ppp1caa	0	0.459716	0.345	0.112	0	3	ppp1caa	III
cct3	0	0.459348	0.597	0.276	0	3	cct3	III
crip2	0	0.458922	0.157	0.022	0	3	crip2	III
INAVA	0	0.458044	0.202	0.055	0	3	INAVA	III
pbk	0	0.458041	0.151	0.004	0	3	pbk	III
rpl7l1	0	0.457968	0.261	0.055	0	3	rpl7l1	III
eif3s6ip	0	0.457151	0.533	0.225	0	3	eif3s6ip	III
khdrbs1a	0	0.456663	0.93	0.754	0	3	khdrbs1a	III
podxl	0	0.456586	0.18	0.016	0	3	podxl	III
sox19b	0	0.454342	0.128	0.012	0	3	sox19b	III
setb	0	0.454056	0.852	0.625	0	3	setb	III
arpp19b	0	0.453331	0.338	0.113	0	3	arpp19b	III
si:ch211-214j24.10	0	0.453278	0.266	0.054	0	3	si:ch211-214j24.10	III
cyp2ad31	0	0.452545	0.199	0.046	0	3	cyp2ad3	III
snrpb	0	0.451826	0.682	0.379	0	3	snrpb	III
ipo7	0	0.451775	0.313	0.086	0	3	ipo7	III
bzw1b	0	0.451769	0.21	0.031	0	3	bzw1b	III
spc24	0	0.450553	0.145	0.005	0	3	spc24	III
paics	0	0.449464	0.213	0.032	0	3	paics	III
cdca7b	0	0.449183	0.167	0.009	0	3	cdca7b	III
akap12b	0	0.44832	0.193	0.025	0	3	akap12b	III
cnn3b	0	0.448126	0.173	0.013	0	3	cnn3b	III
ctdsp1	0	0.44632	0.178	0.023	0	3	ctdsp1	III
nop2	0	0.444998	0.209	0.034	0	3	nop2	III
arl4aa	0	0.44493	0.129	0.01	0	3	arl4aa	III
uck2b	0	0.444758	0.29	0.064	0	3	uck2b	III
zbtb181	0	0.444122	0.237	0.069	0	3	zbtb18	III
nono	0	0.4436	0.546	0.257	0	3	nono	III
aldh9a1a.11	0	0.443521	0.295	0.085	0	3	aldh9a1a.1	III
ccnb3	0	0.442838	0.121	0.017	0	3	ccnb3	III
ivns1abpb	0	0.44242	0.219	0.036	0	3	ivns1abpb	III
tyms	0	0.442049	0.154	0.005	0	3	tyms	III
ccnd2a	0	0.442032	0.177	0.038	0	3	ccnd2a	III
ptprz1a	0	0.442027	0.156	0.013	0	3	ptprz1a	III
haus4	0	0.43952	0.137	0.004	0	3	haus4	III
odc1	0	0.439209	0.223	0.045	0	3	odc1	III
her8a	0	0.438628	0.161	0.017	0	3	her8a	III
ebna1bp2	0	0.438464	0.329	0.103	0	3	ebna1bp2	III
mid1ip1b1	0	0.438369	0.508	0.219	0	3	mid1ip1b	III
cct6a	0	0.435549	0.453	0.17	0	3	cct6a	III
rcc2	0	0.435454	0.514	0.215	0	3	rcc2	III
gar1	0	0.432797	0.228	0.041	0	3	gar1	III
cbx3a	0	0.432055	0.69	0.408	0	3	cbx3a	III
zic41	0	0.431041	0.188	0.051	0	3	zic4	III
eif3g	0	0.429479	0.63	0.322	0	3	eif3g	III
cldn5a	0	0.428983	0.188	0.023	0	3	cldn5a	III
fgfr4	0	0.427609	0.142	0.009	0	3	fgfr4	III
taf15	0	0.426878	0.447	0.18	0	3	taf15	III
mycn	0	0.426504	0.458	0.182	0	3	mycn	III
wdr43	0	0.425713	0.316	0.092	0	3	wdr43	III
cks2	0	0.425149	0.129	0.004	0	3	cks2	III
sec61a1	0	0.424224	0.434	0.167	0	3	sec61a1	III
prc1a	0	0.423268	0.116	0.008	0	3	prc1a	III
pttg1	0	0.421167	0.132	0.004	0	3	pttg1	III
CABZ01079011.11	0	0.42075	0.353	0.134	0	3	CABZ01079011.1	III
prpf19	0	0.420693	0.272	0.058	0	3	prpf19	III
tmpoa	0	0.420109	0.191	0.029	0	3	tmpoa	III
caprin1b	0	0.419799	0.442	0.172	0	3	caprin1b	III
alyref	0	0.419722	0.582	0.309	0	3	alyref	III
mbd3a	0	0.41795	0.347	0.105	0	3	mbd3a	III
CCT2	0	0.416887	0.68	0.363	0	3	CCT2	III
flna	0	0.416267	0.167	0.03	0	3	flna	III
orc6	0	0.415026	0.149	0.009	0	3	orc6	III
adssl	0	0.414473	0.277	0.074	0	3	adssl	III
dek	0	0.414328	0.27	0.074	0	3	dek	III
cct8	0	0.41344	0.578	0.269	0	3	cct8	III
ube2g1b	0	0.411006	0.22	0.037	0	3	ube2g1b	III
cdca5	0	0.410996	0.155	0.01	0	3	cdca5	III
srsf7a	0	0.410418	0.564	0.263	0	3	srsf7a	III
cish	0	0.410302	0.204	0.039	0	3	cish	III
cct4	0	0.41005	0.674	0.35	0	3	cct4	III
usp1	0	0.40959	0.219	0.034	0	3	usp1	III
nifk	0	0.40855	0.233	0.049	0	3	nifk	III
gnl3	0	0.406873	0.227	0.05	0	3	gnl3	III
zgc:110796	0	0.406597	0.179	0.025	0	3	zgc:110796	III
mob1a	0	0.406387	0.197	0.026	0	3	mob1a	III
srsf3a	0	0.405719	0.439	0.172	0	3	srsf3a	III
gstr2	0	0.405245	0.278	0.077	0	3	gstr	III
eif3f	0	0.404516	0.858	0.603	0	3	eif3f	III
f3b	0	0.403696	0.125	0.023	0	3	f3b	III
adi1	0	0.403398	0.194	0.031	0	3	adi1	III
eif3d	0	0.402581	0.575	0.278	0	3	eif3d	III
orc4	0	0.401871	0.149	0.009	0	3	orc4	III
sox21	0	0.401745	0.216	0.044	0	3	sox2	III
hcfc1a	0	0.401382	0.254	0.062	0	3	hcfc1a	III
ncapd2	0	0.401285	0.139	0.006	0	3	ncapd2	III
baz1b	0	0.400094	0.274	0.08	0	3	baz1b	III
psma1	0	0.399058	0.601	0.295	0	3	psma1	III
ppa1b	0	0.398848	0.454	0.195	0	3	ppa1b	III
sarnp	0	0.397406	0.409	0.152	0	3	sarnp	III
etf1b	0	0.397288	0.315	0.097	0	3	etf1b	III
shmt1	0	0.396832	0.143	0.007	0	3	shmt1	III
exosc3	0	0.396604	0.23	0.048	0	3	exosc3	III
inip	0	0.395599	0.308	0.087	0	3	inip	III
smarcb1b	0	0.395193	0.332	0.107	0	3	smarcb1b	III
eaf2	0	0.394688	0.152	0.013	0	3	eaf2	III
rbm4.3	0	0.394441	0.794	0.492	0	3	rbm4.3	III
nip7	0	0.394262	0.248	0.064	0	3	nip7	III
ddx61	0	0.393624	0.472	0.201	0	3	ddx61	III
ddx39aa	0	0.393609	0.524	0.237	0	3	ddx39aa	III
zgc:110339	0	0.393454	0.169	0.023	0	3	zgc:110339	III
rnaseh2a	0	0.393082	0.215	0.039	0	3	rnaseh2a	III
nolc1	0	0.391172	0.259	0.069	0	3	nolc1	III
fzd10	0	0.390907	0.137	0.015	0	3	fzd10	III
pgrmc12	0	0.38901	0.315	0.097	0	3	pgrmc1	III
snrpd3l	0	0.388966	0.602	0.297	0	3	snrpd3l	III
cd3eap	0	0.388702	0.206	0.037	0	3	cd3eap	III
nop16	0	0.388604	0.248	0.062	0	3	nop16	III
tsr2	0	0.385349	0.222	0.043	0	3	tsr2	III
si:dkey-102m7.3	0	0.384472	0.202	0.044	0	3	si:dkey-102m7.3	III
mapkapk2a	0	0.384454	0.251	0.067	0	3	mapkapk2a	III
tmem47	0	0.384438	0.235	0.06	0	3	tmem47	III
rpa1	0	0.38405	0.27	0.074	0	3	rpa1	III
zgc:162944	0	0.38395	0.233	0.05	0	3	zgc:162944	III
gspt1l	0	0.383866	0.251	0.056	0	3	gspt1l	III
ssb	0	0.383574	0.291	0.089	0	3	ssb	III
abcf1	0	0.382931	0.323	0.111	0	3	abcf1	III
atic	0	0.382576	0.141	0.006	0	3	atic	III
rtkn2a	0	0.382404	0.127	0.006	0	3	rtkn2a	III
nudt1	0	0.382284	0.162	0.014	0	3	nudt1	III
tcf12	0	0.382268	0.23	0.059	0	3	tcf12	III
nudt5	0	0.380859	0.24	0.058	0	3	nudt5	III
fam53b	0	0.379748	0.157	0.017	0	3	fam53b	III
hdlbpa	0	0.376834	0.293	0.085	0	3	hdlbpa	III
nfe2l3	0	0.375323	0.198	0.038	0	3	nfe2l3	III
psmg3	0	0.374235	0.401	0.151	0	3	psmg3	III
mrto4	0	0.373246	0.192	0.034	0	3	mrto4	III
bcas2	0	0.372016	0.459	0.19	0	3	bcas2	III
pon3.2	0	0.371967	0.135	0.014	0	3	pon3.2	III
bysl	0	0.371451	0.278	0.087	0	3	bysl	III
eif2s1b	0	0.370648	0.407	0.161	0	3	eif2s1b	III
esco2	0	0.370265	0.115	0.005	0	3	esco2	III
psma8	0	0.370231	0.525	0.242	0	3	psma8	III
psat1	0	0.369828	0.165	0.034	0	3	psat1	III
cldn121	0	0.36968	0.206	0.045	0	3	cldn12	III
nap1l1	0	0.367424	0.387	0.149	0	3	nap1l1	III
eif4bb	0	0.367328	0.331	0.109	0	3	eif4bb	III
smo	0	0.366671	0.143	0.01	0	3	smo	III
polr2h	0	0.366503	0.256	0.064	0	3	polr2h	III
arf1	0	0.365851	0.169	0.027	0	3	arf1	III
cdon	0	0.364658	0.108	0.006	0	3	cdon	III
hspd1	0	0.364568	0.359	0.139	0	3	hspd1	III
mob3a	0	0.363446	0.178	0.026	0	3	mob3a	III
bub3	0	0.362943	0.285	0.099	0	3	bub3	III
polr2l	0	0.362608	0.574	0.294	0	3	polr2l	III
kars	0	0.362461	0.275	0.079	0	3	kars	III
khsrp	0	0.362421	0.473	0.211	0	3	khsrp	III
zgc:136864	0	0.361991	0.257	0.069	0	3	zgc:136864	III
rnaseh2c	0	0.36153	0.201	0.037	0	3	rnaseh2c	III
2021-09-10	0	0.360619	0.188	0.037	0	3	2021-09-10	III
mcm7	0	0.359554	0.181	0.028	0	3	mcm7	III
nutf2	0	0.359545	0.269	0.071	0	3	nutf2	III
tspan33a	0	0.357152	0.105	0.014	0	3	tspan33a	III
elovl2	0	0.357149	0.139	0.017	0	3	elovl2	III
phf5a	0	0.356822	0.428	0.169	0	3	phf5a	III
hpf1	0	0.35664	0.189	0.032	0	3	hpf1	III
egr2a	0	0.356278	0.16	0.04	0	3	egr2a	III
dnph1	0	0.356221	0.129	0.007	0	3	dnph1	III
smc4	0	0.355832	0.127	0.005	0	3	smc4	III
alcamb	0	0.355817	0.193	0.03	0	3	alcamb	III
rfc3	0	0.355603	0.208	0.043	0	3	rfc3	III
cad	0	0.354693	0.135	0.009	0	3	cad	III
ptges3b	0	0.354458	0.323	0.112	0	3	ptges3b	III
cdv3	0	0.35444	0.394	0.154	0	3	cdv3	III
si:ch211-217k17.7	0	0.352708	0.239	0.067	0	3	si:ch211-217k17.7	III
ahsa1b	0	0.352382	0.315	0.114	0	3	ahsa1b	III
ppil1	0	0.35232	0.224	0.051	0	3	ppil1	III
actl6a	0	0.350041	0.356	0.134	0	3	actl6a	III
cdc6	0	0.349636	0.124	0.008	0	3	cdc6	III
si:dkey-6i22.5	0	0.34899	0.124	0.005	0	3	si:dkey-6i22.5	III
eny2	0	0.348522	0.397	0.155	0	3	eny2	III
snrpc	0	0.347396	0.435	0.176	0	3	snrpc	III
mis12	0	0.344642	0.13	0.006	0	3	mis12	III
nsd2	0	0.344499	0.169	0.021	0	3	nsd2	III
mfap2	0	0.343664	0.123	0.017	0	3	mfap2	III
npc22	0	0.34341	0.329	0.106	0	3	npc2	III
mcmbp	0	0.341672	0.14	0.011	0	3	mcmbp	III
cenpk	0	0.340698	0.132	0.007	0	3	cenpk	III
rbb4l	0	0.338483	0.255	0.066	0	3	rbb4l	III
parp1	0	0.338087	0.306	0.103	0	3	parp1	III
abce1	0	0.337773	0.251	0.069	0	3	abce1	III
pinx1	0	0.33759	0.237	0.063	0	3	pinx1	III
zgc:165555	0	0.336442	0.104	0.004	0	3	zgc:165555	III
psma5	0	0.336378	0.479	0.218	0	3	psma5	III
gpsm2	0	0.335805	0.134	0.015	0	3	gpsm2	III
pwp2h	0	0.335694	0.177	0.033	0	3	pwp2h	III
srsf10b	0	0.333693	0.285	0.083	0	3	srsf10b	III
chrac1	0	0.333311	0.375	0.141	0	3	chrac1	III
syncripl	0	0.333278	0.169	0.026	0	3	syncripl	III
si:dkey-180p18.9	0	0.331586	0.22	0.052	0	3	si:dkey-180p18.9	III
adgrg1	0	0.330787	0.13	0.024	0	3	adgrg1	III
celsr1b	0	0.329268	0.136	0.013	0	3	celsr1b	III
hspa4a	0	0.328449	0.354	0.145	0	3	hspa4a	III
gpc4	0	0.328333	0.141	0.023	0	3	gpc4	III
psme3	0	0.328169	0.294	0.097	0	3	psme3	III
scarb2a	0	0.327488	0.207	0.052	0	3	scarb2a	III
tp53	0	0.326332	0.184	0.034	0	3	tp53	III
kirrel3l	0	0.326064	0.17	0.045	0	3	kirrel3l	III
slc30a1a	0	0.326047	0.265	0.085	0	3	slc30a1a	III
eif3c	0	0.325463	0.507	0.24	0	3	eif3c	III
si:dkey-188h10.3	0	0.32345	0.145	0.023	0	3	si:dkey-188h10.3	III
cbx2	0	0.323139	0.214	0.049	0	3	cbx2	III
bxdc2	0	0.322917	0.244	0.07	0	3	bxdc2	III
eif3ja	0	0.322591	0.441	0.19	0	3	eif3ja	III
bcl7bb	0	0.322383	0.163	0.023	0	3	bcl7bb	III
dld	0	0.322135	0.103	0.007	0	3	dld	III
dnmbp	0	0.320972	0.141	0.018	0	3	dnmbp	III
asf1bb	0	0.320662	0.32	0.123	0	3	asf1bb	III
zgc:92242	0	0.32001	0.138	0.02	0	3	zgc:92242	III
gemin8	0	0.31988	0.175	0.03	0	3	gemin8	III
smarcd1	0	0.319107	0.444	0.195	0	3	smarcd1	III
pole3	0	0.31893	0.241	0.066	0	3	pole3	III
lima1a	0	0.318728	0.132	0.027	0	3	lima1a	III
clns1a	0	0.318474	0.201	0.046	0	3	clns1a	III
baz1a	0	0.317388	0.133	0.01	0	3	baz1a	III
psmb5	0	0.317337	0.306	0.11	0	3	psmb5	III
eif4g1a	0	0.317337	0.234	0.066	0	3	eif4g1a	III
rfc2	0	0.317215	0.158	0.024	0	3	rfc2	III
slc1a3a	0	0.317157	0.117	0.01	0	3	slc1a3a	III
rhogc	0	0.31647	0.188	0.041	0	3	rhogc	III
trmt61a	0	0.316338	0.159	0.024	0	3	trmt61a	III
endouc	0	0.315228	0.15	0.025	0	3	endouc	III
dvl2	0	0.313379	0.131	0.008	0	3	dvl2	III
metrnl	0	0.31244	0.195	0.051	0	3	metrnl	III
rcc1	0	0.312292	0.17	0.028	0	3	rcc1	III
agmo	0	0.310849	0.129	0.022	0	3	agmo	III
bckdhbl	0	0.310116	0.128	0.019	0	3	bckdhbl	III
prtfdc1	0	0.310055	0.159	0.028	0	3	prtfdc1	III
cdc26	0	0.308623	0.263	0.082	0	3	cdc26	III
lyar	0	0.308397	0.194	0.045	0	3	lyar	III
si:ch211-198a12.6	0	0.307998	0.3	0.096	0	3	si:ch211-198a12.6	III
atp6v1e1a	0	0.307888	0.141	0.02	0	3	atp6v1e1a	III
fzd7a	0	0.30776	0.173	0.04	0	3	fzd7a	III
abcf2a	0	0.307288	0.304	0.11	0	3	abcf2a	III
si:ch73-308l14.2	0	0.305628	0.188	0.042	0	3	si:ch73-308l14.2	III
prdx6	0	0.304708	0.254	0.08	0	3	prdx6	III
ddx27	0	0.30463	0.213	0.053	0	3	ddx27	III
si:ch211-108d22.2	0	0.303679	0.124	0.011	0	3	si:ch211-108d22.2	III
sypl2a	0	0.303467	0.128	0.021	0	3	sypl2a	III
si:ch1073-170o4.1	0	0.303458	0.127	0.018	0	3	si:ch1073-170o4.1	III
ezh2	0	0.302262	0.148	0.021	0	3	ezh2	III
ccdc12	0	0.302133	0.204	0.051	0	3	ccdc12	III
pnp5a	0	0.301899	0.171	0.033	0	3	pnp5a	III
carm1	0	0.301744	0.288	0.089	0	3	carm1	III
nfybb	0	0.301644	0.258	0.086	0	3	nfybb	III
chtf8	0	0.301011	0.122	0.005	0	3	chtf8	III
nup37	0	0.300936	0.153	0.021	0	3	nup37	III
ddah2	0	0.300759	0.119	0.017	0	3	ddah2	III
nde1	0	0.299189	0.119	0.013	0	3	nde1	III
tmem184ba	0	0.298669	0.161	0.031	0	3	tmem184ba	III
prmt5	0	0.298341	0.197	0.045	0	3	prmt5	III
rhbdl3	0	0.297482	0.154	0.033	0	3	rhbdl3	III
ndc80	0	0.297235	0.113	0.006	0	3	ndc80	III
pola1	0	0.29703	0.119	0.009	0	3	pola1	III
st5	0	0.294175	0.117	0.009	0	3	st5	III
fam120c	0	0.293993	0.255	0.082	0	3	fam120c	III
llph	0	0.293428	0.195	0.047	0	3	llph	III
smarcc1a	0	0.292888	0.227	0.069	0	3	smarcc1a	III
zgc:110224	0	0.292159	0.117	0.007	0	3	zgc:110224	III
rrp1	0	0.29192	0.209	0.055	0	3	rrp1	III
pdxka	0	0.291305	0.144	0.029	0	3	pdxka	III
utp3	0	0.290659	0.18	0.039	0	3	utp3	III
ddx24	0	0.2906	0.191	0.045	0	3	ddx24	III
krcp	0	0.290322	0.106	0.003	0	3	krcp	III
plagx	0	0.288333	0.125	0.009	0	3	plagx	III
e2f4	0	0.28675	0.176	0.033	0	3	e2f4	III
jagn1b	0	0.286596	0.164	0.03	0	3	jagn1b	III
foxp4	0	0.286559	0.467	0.158	0	3	foxp4	III
cenpw	0	0.285353	0.164	0.032	0	3	cenpw	III
pes	0	0.285285	0.21	0.057	0	3	pes	III
nme3	0	0.284576	0.237	0.067	0	3	nme3	III
ube2t	0	0.284106	0.104	0.005	0	3	ube2t	III
LUC7L2	0	0.282749	0.248	0.074	0	3	LUC7L2	III
plgrkt	0	0.282732	0.171	0.036	0	3	plgrkt	III
gcshb	0	0.281444	0.122	0.012	0	3	gcshb	III
tpm4a	0	0.280396	0.116	0.012	0	3	tpm4a	III
rcl1	0	0.280251	0.153	0.028	0	3	rcl1	III
twistnb	0	0.280123	0.172	0.04	0	3	twistnb	III
rhocb	0	0.279804	0.198	0.054	0	3	rhocb	III
ndc1	0	0.279167	0.183	0.036	0	3	ndc1	III
tram1	0	0.278739	0.139	0.023	0	3	tram1	III
atf1	0	0.278264	0.211	0.056	0	3	atf1	III
serpine2	0	0.275798	0.143	0.025	0	3	serpine2	III
rexo4	0	0.275651	0.174	0.038	0	3	rexo4	III
xrcc1	0	0.274471	0.183	0.043	0	3	xrcc1	III
rcor1	0	0.274086	0.181	0.045	0	3	rcor1	III
msh6	0	0.274069	0.117	0.008	0	3	msh6	III
eed	0	0.273696	0.175	0.039	0	3	eed	III
tmem134	0	0.273644	0.113	0.014	0	3	tmem134	III
armc1l	0	0.273007	0.104	0.007	0	3	armc1l	III
e2f3	0	0.2728	0.108	0.007	0	3	e2f3	III
sox13	0	0.272331	0.112	0.015	0	3	sox13	III
CU693502.1	0	0.272005	0.104	0.013	0	3	CU693502.1	III
cib1	0	0.270526	0.129	0.021	0	3	cib1	III
nrarpb	0	0.269755	0.103	0.012	0	3	nrarpb	III
sparc	0	0.267933	0.144	0.033	0	3	sparc	III
mapre1a	0	0.267583	0.122	0.015	0	3	mapre1a	III
wdr36	0	0.266195	0.162	0.031	0	3	wdr36	III
carhsp1	0	0.264979	0.15	0.03	0	3	carhsp1	III
nuf2	0	0.264748	0.101	0.003	0	3	nuf2	III
vaspb	0	0.264337	0.146	0.03	0	3	vaspb	III
cyyr1	0	0.264081	0.111	0.009	0	3	cyyr1	III
gpm6bb	0	0.26389	0.111	0.02	0	3	gpm6bb	III
wee1	0	0.263417	0.105	0.006	0	3	wee1	III
mybbp1a	0	0.261166	0.142	0.025	0	3	mybbp1a	III
rgrb	0	0.261154	0.111	0.009	0	3	rgrb	III
ppil3	0	0.260606	0.191	0.043	0	3	ppil3	III
pon2	0	0.259382	0.119	0.022	0	3	pon2	III
emg1	0	0.259053	0.155	0.032	0	3	emg1	III
polr2eb	0	0.258507	0.272	0.093	0	3	polr2eb	III
pold1	0	0.257659	0.103	0.006	0	3	pold1	III
smad5	0	0.257643	0.111	0.011	0	3	smad5	III
hspa14	0	0.256641	0.203	0.056	0	3	hspa14	III
ebp	0	0.255506	0.122	0.018	0	3	ebp	III
ajuba	0	0.255382	0.115	0.014	0	3	ajuba	III
bms1	0	0.254668	0.148	0.031	0	3	bms1	III
pdlim1	0	0.25355	0.101	0.007	0	3	pdlim1	III
napab	0	0.253411	0.129	0.021	0	3	napab	III
si:dkey-251i10.3	0	0.252698	0.136	0.02	0	3	si:dkey-251i10.3	III
kpnb3	0	0.252171	0.178	0.044	0	3	kpnb3	III
prkab1b	0	0.251668	0.196	0.053	0	3	prkab1b	III
kpnb1	0	0.251304	0.224	0.065	0	3	kpnb1	III
wdr3	0	0.250745	0.13	0.024	0	3	wdr3	III
amotl2a	0	0.250324	0.11	0.015	0	3	amotl2a	III
sort1a	0	0.250181	0.136	0.024	0	3	sort1a	III
sf3b4	6.68069e-308	0.263984	0.242	0.081	1.15162e-303	3	sf3b4	III
tmem176l.1	2.03293e-305	0.25918	0.135	0.03	3.50437e-301	3	tmem176l.1	III
ctcf	4.103e-305	0.260647	0.191	0.055	7.07275e-301	3	ctcf	III
srsf2a	9.01146e-305	0.386463	0.708	0.417	1.5534e-300	3	srsf2a	III
rwdd1	9.18701e-303	0.297036	0.329	0.13	1.58366e-298	3	rwdd1	III
hhip	1.43302e-300	0.336225	0.115	0.023	2.47024e-296	3	hhip	III
sae1	1.33048e-299	0.251332	0.187	0.054	2.29348e-295	3	sae1	III
eif3s10	2.09065e-299	0.293435	0.421	0.186	3.60387e-295	3	eif3s10	III
ppp4cb	1.87992e-296	0.292061	0.327	0.131	3.24061e-292	3	ppp4cb	III
hspe1	1.94634e-294	0.393957	0.669	0.392	3.3551e-290	3	hspe1	III
cnpy1	7.07028e-293	0.383398	0.132	0.031	1.21877e-288	3	cnpy1	III
cyp3c1	3.37136e-291	0.358465	0.157	0.042	5.81156e-287	3	cyp3c1	III
fsta	5.90322e-291	0.314777	0.107	0.02	1.0176e-286	3	fsta	III
hs3st1l2	1.78819e-290	0.331861	0.116	0.024	3.08247e-286	3	hs3st1l2	III
hnrnpl	1.60323e-287	0.295443	0.419	0.188	2.76365e-283	3	hnrnpl	III
zgc:920271	1.82666e-286	0.268164	0.206	0.066	3.14879e-282	3	zgc:92027	III
snrpa	1.84927e-286	0.27349	0.396	0.173	3.18777e-282	3	snrpa	III
s100v2	4.69095e-286	0.393285	0.138	0.034	8.08625e-282	3	s100v2	III
qki2	3.54044e-285	0.289292	0.155	0.041	6.10301e-281	3	qki2	III
snrpd2	2.22335e-283	0.364867	0.643	0.363	3.83262e-279	3	snrpd2	III
tmem176	2.04607e-281	0.273674	0.105	0.02	3.52701e-277	3	tmem176	III
cct7	4.21958e-279	0.341744	0.663	0.372	7.2737e-275	3	cct7	III
msmo1	7.56334e-278	0.27066	0.13	0.031	1.30377e-273	3	msmo1	III
CU694197.1	1.55611e-277	0.272452	0.365	0.157	2.68242e-273	3	CU694197.1	III
hypk	2.85498e-276	0.295552	0.464	0.22	4.92142e-272	3	hypk	III
kmt5aa	8.31805e-274	0.263588	0.419	0.19	1.43387e-269	3	kmt5aa	III
hnrnpa1b	1.94691e-271	0.324723	0.517	0.26	3.35609e-267	3	hnrnpa1b	III
si:dkey-42i9.4	1.63986e-270	0.278635	0.454	0.214	2.82679e-266	3	si:dkey-42i9.4	III
SERP1	4.71645e-270	0.298945	0.548	0.278	8.13021e-266	3	SERP1	III
pou3f3b	6.93225e-267	0.258231	0.33	0.139	1.19498e-262	3	pou3f3b	III
igf2bp1	8.05601e-267	0.251481	0.409	0.184	1.38869e-262	3	igf2bp1	III
gse1	4.48341e-266	0.309499	0.2	0.066	7.72849e-262	3	gse1	III
gsx1	2.28423e-265	0.530644	0.101	0.02	3.93755e-261	3	gsx1	III
nck1a	2.23032e-264	0.321479	0.109	0.023	3.84463e-260	3	nck1a	III
sgk11	9.61192e-264	0.29503	0.195	0.063	1.6569e-259	3	sgk1	III
hey1	1.76302e-262	0.327828	0.113	0.025	3.0391e-258	3	hey1	III
cspg5b2	1.92937e-261	0.329737	0.218	0.076	3.32585e-257	3	cspg5b	III
fabp3	3.92349e-260	0.367428	0.932	0.82	6.76331e-256	3	fabp3	III
tdh1	1.10114e-259	0.261566	0.425	0.199	1.89815e-255	3	tdh	III
hnrnpub	5.92367e-259	0.295944	0.503	0.253	1.02112e-254	3	hnrnpub	III
zic2a2	7.38245e-259	0.287161	0.338	0.149	1.27259e-254	3	zic2a	III
prps1a	1.50603e-258	0.285674	0.311	0.13	2.59609e-254	3	prps1a	III
u2af1	3.36781e-255	0.264846	0.48	0.235	5.80543e-251	3	u2af1	III
dbi	4.18013e-255	0.30602	0.528	0.273	7.2057e-251	3	dbi	III
psma2	9.60017e-252	0.267014	0.465	0.226	1.65488e-247	3	psma2	III
hdac1	8.94792e-251	0.339682	0.758	0.489	1.54244e-246	3	hdac1	III
psmb7	9.54719e-251	0.337625	0.621	0.348	1.64574e-246	3	psmb7	III
cx432	5.03754e-249	0.251444	0.196	0.067	8.6837e-245	3	cx43	III
tktb	6.04814e-248	0.275464	0.29	0.12	1.04258e-243	3	tktb	III
zic52	1.49042e-247	0.501998	0.203	0.071	2.56918e-243	3	zic5	III
psmb1	4.58631e-246	0.319135	0.616	0.344	7.90588e-242	3	psmb1	III
tp53inp2	5.35514e-241	0.498893	0.291	0.128	9.2312e-237	3	tp53inp2	III
insm1b1	1.7895e-240	0.40553	0.216	0.08	3.08475e-236	3	insm1b	III
cct5	2.99239e-238	0.315117	0.696	0.414	5.15828e-234	3	cct5	III
pax6a	1.47064e-235	0.292242	0.121	0.031	2.53509e-231	3	pax6a	III
h3f3b.1	3.62129e-235	0.590066	0.857	0.733	6.24237e-231	3	h3f3b.1	III
junba2	1.06256e-228	0.353249	0.584	0.358	1.83164e-224	3	junba	III
rgcc	2.20352e-222	0.303406	0.121	0.032	3.79844e-218	3	rgcc	III
top1l	1.29642e-220	0.315883	0.42	0.212	2.23477e-216	3	top1l	III
zic11	7.26834e-219	0.25432	0.237	0.094	1.25292e-214	3	zic1	III
vim1	1.34733e-218	0.651175	0.201	0.077	2.32252e-214	3	vim	III
atf32	3.26517e-212	0.351318	0.454	0.244	5.6285e-208	3	atf3	III
sf3b5	7.21711e-212	0.25285	0.516	0.275	1.24409e-207	3	sf3b5	III
clybl	1.1739e-206	0.49187	0.149	0.049	2.02357e-202	3	clybl	III
ptn1	1.40155e-202	0.291827	0.171	0.06	2.41598e-198	3	ptn	III
pomp	1.86875e-193	0.288551	0.631	0.377	3.22135e-189	3	pomp	III
rbp5	2.80345e-189	0.343211	0.124	0.038	4.83259e-185	3	rbp5	III
si:ch211-137a8.4	1.36532e-188	0.297634	0.638	0.397	2.35354e-184	3	si:ch211-137a8.4	III
egr1	1.03315e-179	0.289444	0.316	0.158	1.78094e-175	3	egr1	III
prmt1	2.30652e-179	0.267359	0.557	0.329	3.97599e-175	3	prmt1	III
bcam	7.25534e-175	0.437326	0.195	0.082	1.25067e-170	3	bcam	III
slc1a2b2	3.86169e-171	0.546914	0.405	0.241	6.65679e-167	3	slc1a2b	III
larp4ab	8.68643e-168	0.319768	0.363	0.193	1.49737e-163	3	larp4ab	III
hepacama	7.55592e-165	0.269037	0.123	0.04	1.30249e-160	3	hepacama	III
ilf2	1.03255e-164	0.260392	0.613	0.376	1.77992e-160	3	ilf2	III
lrrn1	6.72746e-159	0.258968	0.229	0.104	1.15968e-154	3	lrrn1	III
s100b	1.35767e-150	0.52747	0.102	0.032	2.34035e-146	3	s100b	III
hnrnpa0a	1.12781e-148	0.305138	0.544	0.334	1.94413e-144	3	hnrnpa0a	III
jdp2b2	3.34511e-138	0.565268	0.498	0.327	5.7663e-134	3	jdp2b	III
dclk2a	5.58993e-136	0.262483	0.101	0.033	9.63592e-132	3	dclk2a	III
neurod12	1.4415e-127	0.707835	0.292	0.166	2.48486e-123	3	neurod1	III
ptgdsb.12	3.19911e-123	0.27974	0.311	0.173	5.51462e-119	3	ptgdsb.1	III
nhlh2	5.45892e-120	0.516734	0.191	0.094	9.41009e-116	3	nhlh2	III
scrt2	8.06417e-117	0.343174	0.189	0.092	1.3901e-112	3	scrt2	III
en1b	1.99035e-93	0.263574	0.121	0.054	3.43096e-89	3	en1b	III
crabp1a	5.76559e-91	0.302222	0.126	0.057	9.93873e-87	3	crabp1a	III
mt22	4.40128e-26	0.488156	0.235	0.172	7.58693e-22	3	mt2	III
gng8	0	2.98644	0.17	0.01	0	4	gng8	I
nebl	0	2.08722	0.405	0.023	0	4	nebl	I
neurod13	0	1.80922	0.584	0.158	0	4	neurod1	I
dusp52	0	1.78252	0.525	0.145	0	4	dusp5	I
zic2a3	0	1.75707	0.593	0.15	0	4	zic2a	I
qkia2	0	1.73427	0.519	0.217	0	4	qkia	I
zic53	0	1.65916	0.42	0.069	0	4	zic5	I
tcima	0	1.62131	0.25	0.054	0	4	tcima	I
dlg1	0	1.60505	0.261	0.039	0	4	dlg1	I
cspg5b3	0	1.59285	0.36	0.08	0	4	cspg5b	I
fxyd1	0	1.3756	0.22	0.04	0	4	fxyd1	I
sypb1	0	1.35449	0.664	0.355	0	4	sypb	I
olfm2b	0	1.33375	0.174	0.006	0	4	olfm2b	I
zgc:101731	0	1.28075	0.102	0.008	0	4	zgc:101731	I
zic12	0	1.2607	0.386	0.098	0	4	zic1	I
LO018550.1	0	1.25097	0.129	0.016	0	4	LO018550.1	I
snap25b3	0	1.2328	0.733	0.498	0	4	snap25b	I
zic3	0	1.22103	0.494	0.201	0	4	zic3	I
synpr	0	1.21938	0.173	0.013	0	4	synpr	I
si:ch211-237l4.6	0	1.18583	0.17	0.011	0	4	si:ch211-237l4.6	I
tob1b1	0	1.10107	0.815	0.55	0	4	tob1b	I
fat2	0	1.06221	0.151	0.004	0	4	fat2	I
sv2bb1	0	1.05707	0.297	0.075	0	4	sv2bb	I
zgc:92107	0	1.02877	0.17	0.021	0	4	zgc:92107	I
bean1	0	1.0086	0.182	0.029	0	4	bean1	I
gabra4	0	0.989886	0.179	0.031	0	4	gabra4	I
syt6b	0	0.95855	0.162	0.017	0	4	syt6b	I
si:ch1073-90m23.1	0	0.94573	0.107	0.001	0	4	si:ch1073-90m23.1	I
camk1ga	0	0.935821	0.112	0.003	0	4	camk1ga	I
mstnb	0	0.855592	0.11	0.009	0	4	mstnb	I
rasd11	6.77568e-289	1.09699	0.435	0.175	1.16799e-284	4	rasd1	I
ccng13	6.6748e-288	1.66488	0.413	0.182	1.1506e-283	4	ccng1	I
etv1	1.78933e-283	0.92061	0.155	0.027	3.08445e-279	4	etv1	I
hpcal43	4.66672e-282	1.10353	0.334	0.116	8.04449e-278	4	hpcal4	I
si:dkeyp-72h1.1	1.03559e-279	1.63806	0.245	0.068	1.78516e-275	4	si:dkeyp-72h1.1	I
tspan18a1	2.28359e-277	0.998249	0.331	0.112	3.93646e-273	4	tspan18a	I
zic42	8.2095e-276	1.00253	0.233	0.061	1.41515e-271	4	zic4	I
sept9b	4.20778e-264	1.02968	0.203	0.05	7.25336e-260	4	sept9b	I
zbtb182	3.28353e-262	1.00038	0.269	0.082	5.66015e-258	4	zbtb18	I
ppp1r1b	3.04176e-259	0.779791	0.129	0.021	5.24339e-255	4	ppp1r1b	I
nptnb1	7.13938e-246	0.926345	0.439	0.201	1.23069e-241	4	nptnb	I
neurod2	8.51592e-245	0.855074	0.169	0.037	1.46798e-240	4	neurod2	I
nr4a3	5.33766e-241	0.838698	0.159	0.033	9.20106e-237	4	nr4a3	I
nrn1a3	1.16523e-240	0.890663	0.451	0.206	2.00862e-236	4	nrn1a	I
olfm1a2	8.15243e-237	1.07305	0.308	0.112	1.40532e-232	4	olfm1a	I
nptx1l3	1.35278e-236	1.00075	0.364	0.148	2.33192e-232	4	nptx1l	I
gsg1l	3.661e-208	1.0166	0.104	0.017	6.31082e-204	4	gsg1l	I
atpv0e22	5.29039e-201	0.48871	0.881	0.72	9.11957e-197	4	atpv0e2	I
atp6v0cb2	1.03666e-199	0.517037	0.913	0.764	1.787e-195	4	atp6v0cb	I
pou4f11	1.05405e-198	1.14217	0.204	0.06	1.81697e-194	4	pou4f1	I
zic2b	3.75309e-198	0.816754	0.135	0.029	6.46957e-194	4	zic2b	I
sncb1	1.84458e-197	0.707295	0.856	0.69	3.17969e-193	4	sncb	I
kcnj19b	4.13115e-193	0.731637	0.116	0.022	7.12127e-189	4	kcnj19b	I
sh3gl2a1	1.74501e-191	0.821424	0.541	0.325	3.00806e-187	4	sh3gl2a	I
syt9b	5.67043e-186	0.923816	0.166	0.044	9.77469e-182	4	syt9b	I
neurod6b3	1.2002e-182	0.834643	0.261	0.094	2.06891e-178	4	neurod6b	I
ndrg3b1	1.22044e-181	1.00253	0.442	0.247	2.10379e-177	4	ndrg3b	I
ip6k2a1	9.46353e-178	0.808704	0.563	0.369	1.63132e-173	4	ip6k2a	I
rims1a	4.69122e-169	0.73894	0.176	0.052	8.08672e-165	4	rims1a	I
cpe2	2.35369e-166	0.545781	0.764	0.566	4.0573e-162	4	cpe	I
camk42	6.92576e-164	0.855673	0.296	0.126	1.19386e-159	4	camk4	I
ppp1r1c	1.64443e-162	0.857446	0.162	0.046	2.83467e-158	4	ppp1r1c	I
zgc:1229792	3.65346e-159	0.846365	0.624	0.417	6.29783e-155	4	zgc:122979	I
kctd12.12	2.00869e-155	1.55341	0.232	0.089	3.46258e-151	4	kctd12.1	I
irx1b	1.12979e-154	0.683705	0.103	0.021	1.94753e-150	4	irx1b	I
tob1a2	3.1863e-151	0.490065	0.815	0.661	5.49254e-147	4	tob1a	I
cbln2b3	1.06575e-150	0.555338	0.336	0.15	1.83714e-146	4	cbln2b	I
prdx11	4.66252e-146	2.36573	0.158	0.049	8.03725e-142	4	prdx1	I
vamp22	2.33339e-145	0.605081	0.626	0.436	4.02229e-141	4	vamp2	I
prox1a	2.64407e-143	0.762909	0.115	0.027	4.55785e-139	4	prox1a	I
nwd2	5.96262e-136	1.2623	0.139	0.04	1.02784e-131	4	nwd2	I
cited4b	3.67651e-134	0.812356	0.408	0.23	6.33756e-130	4	cited4b	I
atp2b1a1	4.56082e-133	0.881428	0.416	0.249	7.86194e-129	4	atp2b1a	I
neurod6a2	1.21456e-132	0.969719	0.213	0.082	2.09366e-128	4	neurod6a	I
rergla1	1.34954e-131	1.00119	0.255	0.11	2.32635e-127	4	rergla	I
ier2b1	4.52858e-130	0.715649	0.501	0.323	7.80636e-126	4	ier2b	I
c1qtnf42	8.84375e-129	0.768899	0.45	0.276	1.52449e-124	4	c1qtnf4	I
etv5a	2.96652e-128	0.835935	0.155	0.051	5.11369e-124	4	etv5a	I
ywhaz2	3.52376e-122	0.628191	0.691	0.588	6.07425e-118	4	ywhaz	I
btg11	6.3214e-122	0.426098	0.859	0.767	1.08968e-117	4	btg1	I
dtnbp1a1	4.18636e-117	0.818381	0.237	0.106	7.21645e-113	4	dtnbp1a	I
r3hdm13	1.75463e-111	0.580243	0.416	0.246	3.02463e-107	4	r3hdm1	I
dixdc1b	1.53862e-110	0.601355	0.127	0.039	2.65228e-106	4	dixdc1b	I
nfia2	5.76172e-109	0.650272	0.23	0.102	9.93206e-105	4	nfia	I
gdpd5b	1.82924e-105	0.582663	0.103	0.028	3.15325e-101	4	gdpd5b	I
appa1	2.8768e-104	0.561003	0.608	0.479	4.95902e-100	4	appa	I
btbd6a1	2.25979e-102	0.739114	0.208	0.091	3.89543e-98	4	btbd6a	I
rab6ba2	3.49892e-102	0.650685	0.412	0.258	6.03143e-98	4	rab6ba	I
tmem1781	4.18289e-100	0.645891	0.197	0.083	7.21047e-96	4	tmem178	I
syt1a2	1.16891e-97	0.43476	0.577	0.403	2.01497e-93	4	syt1a	I
gabrb21	4.86376e-96	0.657672	0.257	0.128	8.38416e-92	4	gabrb2	I
rap1b1	2.58843e-95	0.809698	0.349	0.214	4.46194e-91	4	rap1b	I
atp6ap22	2.98782e-95	0.405098	0.718	0.581	5.1504e-91	4	atp6ap2	I
pvalb7	7.3534e-95	0.584014	0.156	0.059	1.26758e-90	4	pvalb7	I
zgc:162707	6.56311e-93	0.810825	0.17	0.069	1.13135e-88	4	zgc:162707	I
pou4f22	1.78104e-91	0.279955	0.197	0.083	3.07015e-87	4	pou4f2	I
si:ch211-151p13.81	5.93056e-91	0.59934	0.248	0.123	1.02231e-86	4	si:ch211-151p13.8	I
aldocb2	1.21395e-90	0.366709	0.834	0.704	2.09261e-86	4	aldocb	I
map2k2a	3.52491e-88	0.686064	0.132	0.049	6.07624e-84	4	map2k2a	I
h1fx1	4.38551e-88	0.869757	0.415	0.275	7.55974e-84	4	h1fx	I
atp6v1e1b2	3.92454e-87	0.402156	0.726	0.604	6.76512e-83	4	atp6v1e1b	I
dap1b	2.07377e-86	0.684654	0.667	0.587	3.57476e-82	4	dap1b	I
msi2b2	1.26455e-85	0.719812	0.314	0.184	2.17982e-81	4	msi2b	I
bhlhe401	1.81794e-83	0.487235	0.508	0.359	3.13377e-79	4	bhlhe40	I
rsrp1	4.46626e-83	0.278852	0.906	0.866	7.69894e-79	4	rsrp1	I
anp32e	1.76932e-82	0.466862	0.561	0.441	3.04996e-78	4	anp32e	I
myt1b	2.51912e-82	0.65324	0.299	0.172	4.34247e-78	4	myt1b	I
atp1a1a.1	2.26432e-81	0.589086	0.38	0.248	3.90323e-77	4	atp1a1a.1	I
gabarapl22	3.87886e-81	0.36765	0.69	0.58	6.68638e-77	4	gabarapl2	I
tspan7b1	6.95062e-80	0.371328	0.755	0.644	1.19815e-75	4	tspan7b	I
rbfox3a2	2.06882e-79	0.80827	0.307	0.183	3.56623e-75	4	rbfox3a	I
ncs1a	4.16805e-76	0.495636	0.113	0.04	7.18489e-72	4	ncs1a	I
sult4a11	4.23166e-76	0.491312	0.465	0.329	7.29454e-72	4	sult4a1	I
gnb5b	5.07012e-74	0.505185	0.176	0.08	8.73987e-70	4	gnb5b	I
cdk15	1.14365e-73	0.561428	0.111	0.04	1.97143e-69	4	cdk15	I
prune21	1.16871e-73	0.600016	0.211	0.107	2.01463e-69	4	prune2	I
stmn42	5.44137e-73	0.422022	0.673	0.543	9.37984e-69	4	stmn4	I
lmo4b1	2.55824e-72	0.74981	0.311	0.189	4.40989e-68	4	lmo4b	I
histh1l1	2.45458e-70	0.645636	0.416	0.291	4.2312e-66	4	histh1l	I
syn2a2	2.81044e-70	0.4733	0.497	0.368	4.84464e-66	4	syn2a	I
ccl44	1.56432e-69	0.565791	0.114	0.043	2.69657e-65	4	ccl44	I
anks1b1	4.34995e-69	0.530403	0.346	0.221	7.49844e-65	4	anks1b	I
atp2b21	6.85422e-69	0.601594	0.37	0.252	1.18153e-64	4	atp2b2	I
atp1b2a2	8.7055e-69	0.345911	0.628	0.494	1.50065e-64	4	atp1b2a	I
mapk11	1.51581e-67	0.609283	0.158	0.073	2.61295e-63	4	mapk11	I
h1f01	2.28275e-67	0.451648	0.611	0.514	3.93501e-63	4	h1f0	I
atcaya1	3.28137e-67	0.470136	0.417	0.291	5.65643e-63	4	atcaya	I
adam23a1	3.93412e-67	0.511624	0.245	0.136	6.78163e-63	4	adam23a	I
syt122	7.77133e-67	0.631516	0.326	0.21	1.33962e-62	4	syt12	I
atp6v0d12	8.42638e-67	0.426575	0.549	0.433	1.45254e-62	4	atp6v0d1	I
diras1a1	1.36277e-66	0.562073	0.452	0.334	2.34914e-62	4	diras1a	I
pik3ip11	6.30422e-66	0.60874	0.322	0.204	1.08672e-61	4	pik3ip1	I
nptna1	1.72599e-65	0.459505	0.538	0.412	2.97526e-61	4	nptna	I
ndrg3a1	2.39186e-65	0.34757	0.659	0.544	4.1231e-61	4	ndrg3a	I
atp6v1g12	2.74684e-65	0.31049	0.806	0.739	4.73501e-61	4	atp6v1g1	I
cacng7b	8.99857e-64	0.465108	0.129	0.054	1.55117e-59	4	cacng7b	I
stmn2a2	7.95951e-63	0.457324	0.683	0.599	1.37206e-58	4	stmn2a	I
2021-06-01	8.28803e-62	0.43164	0.656	0.553	1.42869e-57	4	jun	I
b3gat2	2.21948e-61	0.508947	0.148	0.067	3.82594e-57	4	b3gat2	I
atp2b3a1	2.53552e-60	0.647571	0.213	0.118	4.37073e-56	4	atp2b3a	I
mef2d1	3.50429e-60	0.532722	0.271	0.164	6.0407e-56	4	mef2d	I
si:ch211-260e23.9	6.71388e-59	0.525905	0.322	0.21	1.15734e-54	4	si:ch211-260e23.9	I
phyhiplb	2.514e-58	0.609949	0.185	0.098	4.33363e-54	4	phyhiplb	I
upf3a1	4.01798e-58	0.457137	0.416	0.298	6.9262e-54	4	upf3a	I
IGLON51	8.72558e-57	0.56314	0.342	0.234	1.50412e-52	4	IGLON5	I
clu	2.5247e-56	0.588371	0.134	0.061	4.35208e-52	4	clu	I
pim11	2.9155e-56	0.441848	0.579	0.49	5.02574e-52	4	pim1	I
oxr1b	6.60478e-56	0.467725	0.104	0.042	1.13853e-51	4	oxr1b	I
tshz2	3.53626e-54	0.553429	0.131	0.06	6.09581e-50	4	tshz2	I
SMIM181	7.64248e-54	0.522536	0.292	0.187	1.31741e-49	4	SMIM18	I
fundc11	7.96269e-54	0.272619	0.71	0.63	1.37261e-49	4	fundc1	I
sccpdhb	5.23291e-51	0.491271	0.123	0.056	9.02049e-47	4	sccpdhb	I
bhlhe23	4.70798e-50	0.370943	0.109	0.046	8.11562e-46	4	bhlhe23	I
fam214a	5.25388e-50	0.49476	0.104	0.044	9.05664e-46	4	fam214a	I
nr1d2a1	1.14843e-49	0.399778	0.487	0.384	1.97966e-45	4	nr1d2a	I
syt2a1	5.63579e-49	0.584207	0.246	0.153	9.71497e-45	4	syt2a	I
dedd11	1.23661e-48	0.378202	0.525	0.434	2.13168e-44	4	dedd1	I
negr11	1.51474e-48	0.512933	0.297	0.2	2.61111e-44	4	negr1	I
si:ch211-56a11.2	2.09941e-48	1.9004	0.12	0.057	3.61895e-44	4	si:ch211-56a11.2	I
slc6a17	2.56654e-48	0.451574	0.122	0.056	4.42421e-44	4	slc6a17	I
atp6v0b2	5.99417e-48	0.376679	0.508	0.413	1.03328e-43	4	atp6v0b	I
cxxc5a	1.96436e-47	0.538206	0.285	0.191	3.38616e-43	4	cxxc5a	I
purba1	1.40937e-46	0.394651	0.438	0.342	2.42948e-42	4	purba	I
ndrg41	2.21173e-46	0.490952	0.327	0.228	3.81258e-42	4	ndrg4	I
apba1b	4.71801e-46	0.44297	0.108	0.048	8.13291e-42	4	apba1b	I
ndfip11	6.14836e-46	0.293526	0.622	0.55	1.05985e-41	4	ndfip1	I
tmbim41	5.04098e-45	0.425852	0.394	0.301	8.68965e-41	4	tmbim4	I
celf22	8.29035e-45	0.364183	0.472	0.372	1.42909e-40	4	celf2	I
fosb2	1.33968e-44	0.547445	0.418	0.323	2.30935e-40	4	fosb	I
yaf2	2.8913e-44	0.547802	0.316	0.229	4.98402e-40	4	yaf2	I
aplp12	4.21086e-44	0.390289	0.477	0.381	7.25868e-40	4	aplp1	I
cited21	1.44025e-43	0.481917	0.192	0.111	2.48271e-39	4	cited2	I
luzp21	3.62974e-42	0.514888	0.222	0.139	6.25695e-38	4	luzp2	I
eno1a2	5.21887e-42	0.272716	0.661	0.575	8.99628e-38	4	eno1a	I
ankrd29	5.2805e-42	0.471986	0.146	0.078	9.10253e-38	4	ankrd29	I
fez11	6.49711e-42	0.309432	0.672	0.625	1.11997e-37	4	fez1	I
nck2a	7.6897e-42	0.46011	0.172	0.097	1.32555e-37	4	nck2a	I
tpi1b2	1.65414e-41	0.284756	0.655	0.575	2.85141e-37	4	tpi1b	I
mxi1	1.95416e-41	0.47216	0.213	0.131	3.36858e-37	4	mxi1	I
camk2d21	2.20611e-40	0.472302	0.266	0.179	3.8029e-36	4	camk2d2	I
tefa	2.82359e-40	0.486027	0.432	0.354	4.86731e-36	4	tefa	I
cited4a	4.88197e-40	0.547162	0.145	0.079	8.41553e-36	4	cited4a	I
fam184a	8.2444e-40	0.38106	0.122	0.06	1.42117e-35	4	fam184a	I
pcloa1	1.54236e-38	0.438069	0.236	0.153	2.65872e-34	4	pcloa	I
stx1b2	2.09499e-38	0.336397	0.624	0.549	3.61135e-34	4	stx1b	I
slc4a10a1	2.38466e-38	0.404141	0.162	0.091	4.11067e-34	4	slc4a10a	I
ndufa42	4.0433e-38	0.527352	0.408	0.322	6.96983e-34	4	ndufa4	I
rab3ab1	9.07896e-38	0.433232	0.179	0.106	1.56503e-33	4	rab3ab	I
dpp6b1	1.43577e-37	0.440419	0.191	0.116	2.47498e-33	4	dpp6b	I
higd1a1	3.45591e-37	0.406757	0.493	0.424	5.95731e-33	4	higd1a	I
atp6v1h2	6.78701e-37	0.322258	0.459	0.373	1.16994e-32	4	atp6v1h	I
bsnb1	7.3132e-37	0.42313	0.216	0.138	1.26065e-32	4	bsnb	I
spon1b	8.45256e-37	0.404014	0.118	0.06	1.45705e-32	4	spon1b	I
glrbb1	1.65698e-36	0.376893	0.306	0.216	2.85631e-32	4	glrbb	I
lrrn11	2.95951e-36	0.485536	0.19	0.118	5.10161e-32	4	lrrn1	I
scg31	7.07779e-36	0.65076	0.303	0.225	1.22007e-31	4	scg3	I
laptm4b	8.03164e-36	0.493043	0.278	0.199	1.38449e-31	4	laptm4b	I
ppfia31	9.08243e-36	0.421775	0.276	0.192	1.56563e-31	4	ppfia3	I
srrm4	1.57339e-35	0.527507	0.181	0.111	2.71221e-31	4	srrm4	I
atp1b3a1	4.41362e-35	0.323006	0.463	0.377	7.60819e-31	4	atp1b3a	I
mdh1aa1	1.44786e-34	0.288627	0.617	0.575	2.49583e-30	4	mdh1aa	I
si:ch73-119p20.12	2.68099e-34	0.313041	0.412	0.318	4.6215e-30	4	si:ch73-119p20.1	I
ip6k2b1	2.87474e-34	0.360758	0.506	0.433	4.95547e-30	4	ip6k2b	I
smyd2a1	2.92372e-34	0.55689	0.178	0.111	5.0399e-30	4	smyd2a	I
phyhipla1	8.69644e-34	0.469699	0.242	0.166	1.49909e-29	4	phyhipla	I
atp6v1aa1	8.74652e-34	0.395902	0.342	0.259	1.50772e-29	4	atp6v1aa	I
fam126a	2.6298e-33	0.42054	0.12	0.064	4.53324e-29	4	fam126a	I
tcp11l21	4.17947e-33	0.428088	0.171	0.104	7.20458e-29	4	tcp11l2	I
phactr3b1	4.31105e-33	0.540397	0.243	0.166	7.4314e-29	4	phactr3b	I
1931-09-01	6.39419e-33	0.360417	0.378	0.293	1.10223e-28	4	2021-09-03	I
rgs81	7.92029e-32	0.867806	0.302	0.239	1.3653e-27	4	rgs8	I
zgc:926061	1.99973e-31	0.370238	0.389	0.313	3.44714e-27	4	zgc:92606	I
gnao1a1	3.94651e-31	0.461174	0.371	0.3	6.80299e-27	4	gnao1a	I
pkp4	3.04907e-30	0.403804	0.113	0.061	5.25599e-26	4	pkp4	I
ptpn51	4.22624e-30	0.494575	0.218	0.149	7.2852e-26	4	ptpn5	I
si:ch211-195b15.82	1.51329e-29	0.345379	0.476	0.399	2.60862e-25	4	si:ch211-195b15.8	I
unc119b1	1.8246e-29	0.424784	0.196	0.129	3.14525e-25	4	unc119b	I
si:dkey-13i19.81	2.48179e-29	0.350475	0.377	0.308	4.27811e-25	4	si:dkey-13i19.8	I
max1	4.73441e-29	0.358282	0.45	0.397	8.16118e-25	4	max	I
atf33	4.99768e-29	0.479104	0.347	0.27	8.61499e-25	4	atf3	I
mpp2b1	5.57216e-29	0.37855	0.244	0.171	9.60529e-25	4	mpp2b	I
si:dkey-81l17.61	1.33882e-28	0.317277	0.452	0.38	2.30785e-24	4	si:dkey-81l17.6	I
atp6v1f2	4.44427e-28	0.381514	0.316	0.243	7.66104e-24	4	atp6v1f	I
plekha31	7.44455e-28	0.409052	0.175	0.113	1.28329e-23	4	plekha3	I
rgs201	7.53946e-28	0.383949	0.212	0.143	1.29965e-23	4	rgs20	I
nab1a	8.82006e-28	0.365574	0.109	0.059	1.5204e-23	4	nab1a	I
gatsl2	1.51825e-27	0.464336	0.216	0.151	2.61717e-23	4	gatsl2	I
fth1b	2.27802e-27	0.38778	0.118	0.067	3.92685e-23	4	fth1b	I
csnk1a1	2.37387e-27	0.372393	0.411	0.354	4.09209e-23	4	csnk1a1	I
rtn4r2	3.94438e-27	0.366852	0.166	0.104	6.79932e-23	4	rtn4r	I
kctd8	4.82103e-27	0.359172	0.109	0.059	8.31049e-23	4	kctd8	I
BX469930.1	1.09517e-26	0.450845	0.138	0.083	1.88786e-22	4	BX469930.1	I
nr4a11	2.07447e-26	0.508578	0.393	0.328	3.57598e-22	4	nr4a1	I
mcama	2.45348e-26	0.368955	0.114	0.064	4.22931e-22	4	mcama	I
zgc:1656031	2.69759e-26	0.338681	0.181	0.117	4.65011e-22	4	zgc:165603	I
atp6v1c1a2	2.99301e-26	0.293538	0.409	0.334	5.15934e-22	4	atp6v1c1a	I
itm2cb1	4.44396e-26	0.655716	0.33	0.271	7.6605e-22	4	itm2cb	I
cds21	5.86838e-26	0.399565	0.196	0.133	1.01159e-21	4	cds2	I
1961-09-01	9.84851e-26	0.290605	0.499	0.448	1.69769e-21	4	2021-09-06	I
fosl21	1.26324e-25	0.420425	0.211	0.147	2.17757e-21	4	fosl2	I
tsc22d31	1.75438e-25	0.402018	0.332	0.267	3.0242e-21	4	tsc22d3	I
ppp3r1a1	1.8202e-25	0.362361	0.198	0.134	3.13766e-21	4	ppp3r1a	I
pcsk1nl1	2.10148e-25	0.345633	0.287	0.214	3.62253e-21	4	pcsk1nl	I
ndel1a1	2.35984e-25	0.333309	0.297	0.225	4.06789e-21	4	ndel1a	I
nfkbiab	2.49806e-25	0.373266	0.365	0.304	4.30616e-21	4	nfkbiab	I
cdipt2	5.16976e-25	0.31603	0.335	0.262	8.91162e-21	4	cdipt	I
znf395b1	7.59809e-25	0.301101	0.445	0.385	1.30976e-20	4	znf395b	I
zgc:1530181	1.13236e-24	0.385784	0.166	0.108	1.95197e-20	4	zgc:153018	I
sncgb1	1.5376e-24	0.405878	0.217	0.153	2.65052e-20	4	sncgb	I
rac3b1	3.46184e-24	0.293879	0.458	0.398	5.96751e-20	4	rac3b	I
sept5a1	2.13655e-23	0.276532	0.357	0.285	3.68299e-19	4	sept5a	I
ppme11	2.64681e-23	0.297169	0.402	0.339	4.56257e-19	4	ppme1	I
tmem30ab1	2.72389e-23	0.361969	0.178	0.121	4.69545e-19	4	tmem30ab	I
syn11	4.69661e-23	0.383378	0.163	0.108	8.09602e-19	4	syn1	I
ptprn21	4.69696e-23	0.514451	0.337	0.283	8.09662e-19	4	ptprn2	I
ppfia41	6.2309e-23	0.349412	0.189	0.13	1.07408e-18	4	ppfia4	I
lamtor4	2.65396e-22	0.431302	0.274	0.219	4.57489e-18	4	lamtor4	I
egr42	3.02269e-22	0.340252	0.611	0.557	5.21051e-18	4	egr4	I
zgc:92249	5.21681e-22	0.328047	0.106	0.062	8.99273e-18	4	zgc:92249	I
txnrd3	9.9813e-22	0.739104	0.147	0.099	1.72058e-17	4	txnrd3	I
en1b1	1.20505e-21	0.39725	0.105	0.061	2.07727e-17	4	en1b	I
shisa9a	1.21358e-21	0.450218	0.101	0.059	2.09197e-17	4	shisa9a	I
ccsapb	2.10308e-21	0.315804	0.124	0.076	3.62529e-17	4	ccsapb	I
zgc:918601	6.60557e-21	0.333547	0.142	0.091	1.13867e-16	4	zgc:91860	I
bhlhe412	9.34257e-20	0.258723	0.373	0.307	1.61047e-15	4	bhlhe41	I
ogt.11	9.46717e-20	0.38558	0.255	0.2	1.63195e-15	4	ogt.1	I
acsl4a	1.31462e-19	0.426412	0.212	0.161	2.26615e-15	4	acsl4a	I
prkag2a	1.5084e-19	0.351691	0.115	0.071	2.60018e-15	4	prkag2a	I
atp6v1ba1	1.80011e-19	0.331897	0.23	0.173	3.10303e-15	4	atp6v1ba	I
hagh1	2.5081e-19	0.332004	0.189	0.135	4.32347e-15	4	hagh	I
scocb1	6.03724e-19	0.308469	0.346	0.293	1.0407e-14	4	scocb	I
sst1.1	6.2043e-19	1.05421	0.112	0.07	1.0695e-14	4	sst1.1	I
ak51	8.04384e-19	0.4462	0.13	0.085	1.3866e-14	4	ak5	I
sgtb1	9.56355e-19	0.324607	0.212	0.157	1.64856e-14	4	sgtb	I
zgc:1018402	1.03785e-18	0.283396	0.402	0.344	1.78905e-14	4	zgc:101840	I
amer2	1.4914e-18	0.327096	0.205	0.15	2.57087e-14	4	amer2	I
fam46ba	2.73072e-18	0.378803	0.122	0.079	4.70722e-14	4	fam46ba	I
kctd71	4.18448e-18	0.28984	0.16	0.111	7.21321e-14	4	kctd7	I
madd1	4.76519e-18	0.295581	0.199	0.145	8.21424e-14	4	madd	I
lmo4a	4.79836e-18	0.323195	0.106	0.066	8.27141e-14	4	lmo4a	I
pfkpa2	1.4067e-17	0.332652	0.208	0.156	2.42487e-13	4	pfkpa	I
chd73	1.91528e-17	0.389867	0.142	0.098	3.30156e-13	4	chd7	I
ngb2	2.06061e-17	0.357084	0.235	0.179	3.55208e-13	4	ngb	I
jkamp1	3.34789e-17	0.325893	0.148	0.102	5.7711e-13	4	jkamp	I
plcxd32	4.6662e-17	0.379911	0.204	0.152	8.04359e-13	4	plcxd3	I
ahcyl11	7.92625e-17	0.334768	0.204	0.154	1.36633e-12	4	ahcyl1	I
si:ch211-150g13.3	2.46608e-16	0.320145	0.142	0.098	4.25103e-12	4	si:ch211-150g13.3	I
tcf3b	2.95258e-16	0.370535	0.124	0.084	5.08965e-12	4	tcf3b	I
becn1	2.97952e-16	0.348871	0.128	0.087	5.1361e-12	4	becn1	I
tmem591	3.30165e-16	0.288586	0.289	0.237	5.69139e-12	4	tmem59	I
si:ch211-208k15.1	3.91398e-16	0.279717	0.104	0.066	6.74693e-12	4	si:ch211-208k15.1	I
atp6v0ca1	4.83906e-16	0.269607	0.407	0.363	8.34157e-12	4	atp6v0ca	I
clvs2	9.15987e-16	0.274509	0.127	0.085	1.57898e-11	4	clvs2	I
slc25a32a1	1.15795e-15	0.327692	0.23	0.178	1.99607e-11	4	slc25a32a	I
plekhb21	1.18452e-15	0.267497	0.296	0.244	2.04187e-11	4	plekhb2	I
micu3a	1.36676e-15	0.339424	0.124	0.083	2.35602e-11	4	micu3a	I
carmil22	1.73546e-15	0.272948	0.243	0.189	2.99158e-11	4	carmil2	I
irx1a	2.50334e-15	0.250652	0.112	0.073	4.31526e-11	4	irx1a	I
reep51	3.10989e-15	0.306262	0.378	0.342	5.36083e-11	4	reep5	I
necab21	3.24024e-15	0.278064	0.13	0.087	5.58552e-11	4	necab2	I
olfm1b2	4.50598e-15	0.441791	0.514	0.48	7.76741e-11	4	olfm1b	I
usp2a1	4.9025e-15	0.385464	0.177	0.133	8.45093e-11	4	usp2a	I
bhlhe222	9.60447e-15	0.333507	0.128	0.087	1.65562e-10	4	bhlhe22	I
fam110b	1.36759e-14	0.317278	0.126	0.086	2.35746e-10	4	fam110b	I
si:ch211-195b13.12	1.52803e-14	0.325955	0.363	0.315	2.63403e-10	4	si:ch211-195b13.1	I
mt23	2.15239e-14	0.429165	0.228	0.178	3.71029e-10	4	mt2	I
rab3aa1	3.19711e-14	0.28241	0.215	0.167	5.51117e-10	4	rab3aa	I
slc38a3a1	3.30758e-14	0.3467	0.159	0.117	5.7016e-10	4	slc38a3a	I
pisd	4.83859e-14	0.390291	0.212	0.171	8.34077e-10	4	pisd	I
amph2	5.0334e-14	0.268656	0.292	0.243	8.67658e-10	4	amph	I
arl31	5.21148e-14	0.318171	0.17	0.127	8.98355e-10	4	arl3	I
slc17a6b3	5.54502e-14	0.267656	0.15	0.107	9.55851e-10	4	slc17a6b	I
csnk1db1	8.27089e-14	0.270319	0.336	0.296	1.42574e-09	4	csnk1db	I
CR974456.1	1.15687e-13	0.261142	0.101	0.066	1.99421e-09	4	CR974456.1	I
kiaa1549la1	2.50528e-13	0.277602	0.139	0.099	4.31861e-09	4	kiaa1549la	I
dcun1d2b1	3.39267e-13	0.312964	0.181	0.139	5.84828e-09	4	dcun1d2b	I
med301	4.5739e-13	0.320922	0.152	0.113	7.88448e-09	4	med30	I
vgf2	5.52476e-13	0.338336	0.185	0.142	9.52358e-09	4	vgf	I
slc40a11	5.85586e-13	0.261738	0.145	0.105	1.00943e-08	4	slc40a1	I
rgs9b	6.2331e-13	0.258162	0.106	0.071	1.07446e-08	4	rgs9b	I
sept7b1	1.02304e-12	0.319659	0.255	0.216	1.76351e-08	4	sept7b	I
rab6bb2	1.67906e-12	0.271924	0.351	0.308	2.89436e-08	4	rab6bb	I
nrxn1a2	2.26067e-12	0.271224	0.377	0.337	3.89695e-08	4	nrxn1a	I
rhoab	2.42248e-12	0.278965	0.398	0.369	4.17587e-08	4	rhoab	I
rnf11a	2.71871e-12	0.258358	0.122	0.086	4.68651e-08	4	rnf11a	I
iscub1	3.13936e-12	0.322153	0.138	0.101	5.41162e-08	4	iscub	I
rab3c1	4.06109e-12	0.270123	0.143	0.105	7.00051e-08	4	rab3c	I
btbd6b	5.71693e-12	0.314319	0.237	0.195	9.85485e-08	4	btbd6b	I
gb:bc1398722	5.97334e-12	0.259115	0.262	0.219	1.02968e-07	4	gb:bc139872	I
hnrnpd1	1.06951e-11	0.26349	0.29	0.251	1.84363e-07	4	hnrnpd	I
rab411	5.53977e-11	0.256379	0.312	0.275	9.54945e-07	4	rab41	I
atp6v1d1	6.14211e-11	0.276335	0.177	0.14	1.05878e-06	4	atp6v1d	I
msra	1.44931e-10	0.294132	0.106	0.076	2.49833e-06	4	msra	I
FBXO481	1.90502e-10	0.270797	0.176	0.139	3.28387e-06	4	FBXO48	I
dnm1a	2.16675e-10	0.264423	0.106	0.075	3.73505e-06	4	dnm1a	I
ctnnb2	2.71861e-10	0.319594	0.142	0.11	4.68634e-06	4	ctnnb2	I
tpst11	3.45395e-10	0.277814	0.137	0.103	5.95392e-06	4	tpst1	I
pank21	4.48226e-10	0.27586	0.212	0.175	7.72652e-06	4	pank2	I
scrn3	9.54525e-10	0.264114	0.122	0.091	1.64541e-05	4	scrn3	I
rhocb1	1.13207e-09	0.370371	0.101	0.074	1.95147e-05	4	rhocb	I
ppp1cb	2.8337e-09	0.26673	0.272	0.241	4.88474e-05	4	ppp1cb	I
arl6ip5b1	3.17959e-09	0.296283	0.238	0.207	5.48098e-05	4	arl6ip5b	I
tmem198b1	5.46032e-09	0.29765	0.126	0.096	9.4125e-05	4	tmem198b	I
arglu1a1	9.77686e-09	0.256394	0.255	0.224	0.000168534	4	arglu1a	I
lysmd2	1.49136e-08	0.283755	0.241	0.209	0.00025708	4	lysmd2	I
slc7a8a1	2.10392e-08	0.265762	0.207	0.174	0.000362674	4	slc7a8a	I
baz2ba	2.37697e-08	0.263952	0.132	0.103	0.000409743	4	baz2ba	I
slc25a33	3.0049e-08	0.27269	0.231	0.201	0.000517984	4	slc25a33	I
rims2a1	3.00811e-08	0.25622	0.152	0.121	0.000518538	4	rims2a	I
st6gal2a	6.29924e-08	0.25935	0.121	0.094	0.00108586	4	st6gal2a	I
nat16	6.88435e-08	0.259372	0.164	0.134	0.00118672	4	nat16	I
zgc:158564	9.42747e-08	0.283522	0.175	0.146	0.00162511	4	zgc:158564	I
kctd5a	2.16369e-07	0.339195	0.167	0.14	0.00372976	4	kctd5a	I
lin7c	3.43244e-07	0.258224	0.147	0.12	0.00591685	4	lin7c	I
uqcc31	3.86275e-07	0.253527	0.176	0.148	0.0066586	4	uqcc3	I
prkar2aa	8.83254e-07	0.283711	0.2	0.174	0.0152255	4	prkar2aa	I
prkacab1	1.12176e-06	0.265548	0.191	0.164	0.019337	4	prkacab	I
prdx5	2.52236e-06	0.314101	0.193	0.172	0.0434805	4	prdx5	I
nktr	3.206e-06	0.271668	0.133	0.11	0.055265	4	nktr	I
tax1bp1b	3.88656e-06	0.262145	0.191	0.168	0.0669966	4	tax1bp1b	I
ephb3a	5.40605e-06	0.254095	0.129	0.106	0.0931895	4	ephb3a	I
pcf11	2.53858e-05	0.251815	0.177	0.156	0.437601	4	pcf11	I
mgll	3.77094e-05	0.293395	0.14	0.119	0.650034	4	mgll	I
calb2a3	0.000176374	0.266264	0.145	0.125	1	4	calb2a	I
en2b2	0.00183725	0.317052	0.14	0.125	1	4	en2b	I
ier2a1	0.00207597	0.271277	0.294	0.284	1	4	ier2a	I
cx433	0	3.57241	0.96	0.062	0	5	cx43	IV
ptgdsb.14	0	3.31511	0.972	0.173	0	5	ptgdsb.1	IV
mfge8a2	0	3.28126	0.935	0.065	0	5	mfge8a	IV
atp1a1b4	0	3.26424	0.992	0.135	0	5	atp1a1b	IV
slc1a2b4	0	3.23606	0.986	0.246	0	5	slc1a2b	IV
ptgdsb.23	0	3.15855	0.975	0.181	0	5	ptgdsb.2	IV
fabp7a4	0	3.07601	1	0.561	0	5	fabp7a	IV
atp1b44	0	3.03379	0.981	0.115	0	5	atp1b4	IV
glula3	0	3.02021	0.992	0.536	0	5	glula	IV
zgc:1654614	0	2.98325	0.855	0.12	0	5	zgc:165461	IV
ptn2	0	2.81731	0.939	0.053	0	5	ptn	IV
s1pr14	0	2.77551	0.936	0.078	0	5	s1pr1	IV
id14	0	2.75617	0.95	0.208	0	5	id1	IV
aqp1a.1	0	2.70075	0.705	0.023	0	5	aqp1a.1	IV
si:ch211-251b21.14	0	2.61891	0.745	0.168	0	5	si:ch211-251b21.1	IV
cebpd4	0	2.61409	0.945	0.131	0	5	cebpd	IV
cd634	0	2.59128	0.976	0.163	0	5	cd63	IV
mt24	0	2.5825	0.859	0.163	0	5	mt2	IV
slc4a4a	0	2.46136	0.806	0.031	0	5	slc4a4a	IV
her4.34	0	2.44042	0.894	0.15	0	5	her4.3	IV
zgc:153704	0	2.43826	0.729	0.041	0	5	zgc:153704	IV
efhd12	0	2.41564	0.928	0.108	0	5	efhd1	IV
cd81b	0	2.28437	0.3	0.008	0	5	cd81b	IV
si:ch73-265d7.2	0	2.26831	0.288	0.009	0	5	si:ch73-265d7.2	IV
hspb15	0	2.25883	0.732	0.021	0	5	hspb15	IV
cyp2ad32	0	2.25799	0.824	0.048	0	5	cyp2ad3	IV
her4.14	0	2.24558	0.943	0.313	0	5	her4.1	IV
si:ch211-66e2.51	0	2.21975	0.822	0.042	0	5	si:ch211-66e2.5	IV
eno1b	0	2.20596	0.808	0.031	0	5	eno1b	IV
slc3a2a	0	2.18984	0.769	0.035	0	5	slc3a2a	IV
spry23	0	2.16302	0.847	0.065	0	5	spry2	IV
hepacama1	0	2.15729	0.809	0.032	0	5	hepacama	IV
mdka4	0	2.13351	0.719	0.2	0	5	mdka	IV
endouc1	0	2.12984	0.443	0.033	0	5	endouc	IV
crtac1a	0	2.11756	0.707	0.017	0	5	crtac1a	IV
her4.44	0	2.09626	0.925	0.222	0	5	her4.4	IV
acbd72	0	2.057	0.895	0.23	0	5	acbd7	IV
cyp26b11	0	2.03457	0.458	0.031	0	5	cyp26b1	IV
si:dkey-85k7.71	0	2.01832	0.769	0.046	0	5	si:dkey-85k7.7	IV
selenop4	0	1.9867	0.863	0.084	0	5	selenop	IV
smox3	0	1.98609	0.775	0.088	0	5	smox	IV
slc6a9	0	1.98408	0.642	0.039	0	5	slc6a9	IV
cspg5b4	0	1.98321	0.832	0.077	0	5	cspg5b	IV
her4.24	0	1.96282	0.944	0.349	0	5	her4.2	IV
gstp12	0	1.95757	0.788	0.078	0	5	gstp1	IV
her64	0	1.93261	0.797	0.135	0	5	her6	IV
si:ch211-153f2.7	0	1.88259	0.547	0.013	0	5	si:ch211-153f2.7	IV
ntn1b	0	1.8801	0.28	0.021	0	5	ntn1b	IV
ppap2d1	0	1.86915	0.722	0.03	0	5	ppap2d	IV
cox4i23	0	1.86551	0.802	0.067	0	5	cox4i2	IV
si:ch1073-303k11.21	0	1.86469	0.77	0.038	0	5	si:ch1073-303k11.2	IV
si:ch211-286b5.54	0	1.81345	0.853	0.098	0	5	si:ch211-286b5.5	IV
slc7a10a	0	1.74824	0.265	0.006	0	5	slc7a10a	IV
slc6a1b4	0	1.73717	0.896	0.295	0	5	slc6a1b	IV
cyp3c11	0	1.73516	0.686	0.042	0	5	cyp3c1	IV
msrb2	0	1.70973	0.585	0.009	0	5	msrb2	IV
sept8b	0	1.70269	0.654	0.026	0	5	sept8b	IV
lpin11	0	1.68696	0.718	0.11	0	5	lpin1	IV
mdkb1	0	1.68403	0.997	0.793	0	5	mdkb	IV
ndrg3a2	0	1.66484	0.981	0.54	0	5	ndrg3a	IV
fjx1	0	1.63391	0.614	0.021	0	5	fjx1	IV
robo4	0	1.62346	0.415	0.014	0	5	robo4	IV
jdp2b4	0	1.6023	0.858	0.338	0	5	jdp2b	IV
glulb4	0	1.58671	0.899	0.224	0	5	glulb	IV
gpd1b	0	1.58643	0.421	0.02	0	5	gpd1b	IV
s100v21	0	1.57553	0.649	0.033	0	5	s100v2	IV
npc24	0	1.55782	0.801	0.121	0	5	npc2	IV
msi14	0	1.5557	0.759	0.093	0	5	msi1	IV
hey11	0	1.54517	0.483	0.026	0	5	hey1	IV
abi3a	0	1.5442	0.58	0.016	0	5	abi3a	IV
mgll1	0	1.54048	0.759	0.104	0	5	mgll	IV
cd81a3	0	1.53663	0.98	0.531	0	5	cd81a	IV
wnt7aa	0	1.53653	0.498	0.028	0	5	wnt7aa	IV
atf34	0	1.52498	0.742	0.262	0	5	atf3	IV
gnai2a2	0	1.52396	0.814	0.137	0	5	gnai2a	IV
pdxka1	0	1.52368	0.597	0.031	0	5	pdxka	IV
slc7a10b	0	1.51501	0.545	0.009	0	5	slc7a10b	IV
gdpd2	0	1.51303	0.581	0.022	0	5	gdpd2	IV
sparc1	0	1.49646	0.536	0.036	0	5	sparc	IV
s100b1	0	1.49637	0.47	0.031	0	5	s100b	IV
psap1	0	1.48681	0.831	0.206	0	5	psap	IV
prss351	0	1.46345	0.253	0.022	0	5	prss35	IV
sparcl1	0	1.46238	0.184	0.009	0	5	sparcl1	IV
crip3	0	1.45569	0.649	0.027	0	5	crip3	IV
anxa131	0	1.4545	0.816	0.159	0	5	anxa13	IV
myl9b2	0	1.44722	0.613	0.051	0	5	myl9b	IV
cyp4t8	0	1.43936	0.507	0.012	0	5	cyp4t8	IV
cahz	0	1.4387	0.531	0.031	0	5	cahz	IV
sox34	0	1.42642	0.728	0.105	0	5	sox3	IV
sult6b1	0	1.42253	0.538	0.02	0	5	sult6b1	IV
CR848047.13	0	1.41566	0.716	0.112	0	5	CR848047.1	IV
gstr3	0	1.40429	0.668	0.091	0	5	gstr	IV
BX465834.14	0	1.39116	0.961	0.418	0	5	BX465834.1	IV
her8.21	0	1.38995	0.469	0.045	0	5	her8.2	IV
chp2	0	1.38633	0.655	0.06	0	5	chp2	IV
zfp36l22	0	1.38386	0.575	0.052	0	5	zfp36l2	IV
cxcl144	0	1.38279	0.678	0.089	0	5	cxcl14	IV
sox19a2	0	1.37719	0.593	0.052	0	5	sox19a	IV
plpp31	0	1.37696	0.583	0.042	0	5	plpp3	IV
atp1b1a3	0	1.37646	0.749	0.153	0	5	atp1b1a	IV
mid1ip1l1	0	1.36209	0.806	0.216	0	5	mid1ip1l	IV
slc38a3a2	0	1.34409	0.697	0.104	0	5	slc38a3a	IV
sdcbp21	0	1.33656	0.816	0.199	0	5	sdcbp2	IV
rbp51	0	1.32189	0.33	0.043	0	5	rbp5	IV
tmem176l.11	0	1.32024	0.543	0.032	0	5	tmem176l.1	IV
agmo1	0	1.31541	0.51	0.025	0	5	agmo	IV
wls3	0	1.31001	0.627	0.081	0	5	wls	IV
nog2	0	1.30113	0.492	0.023	0	5	nog2	IV
si:ch211-15b10.61	0	1.2898	0.571	0.053	0	5	si:ch211-15b10.6	IV
ddt1	0	1.27733	0.793	0.209	0	5	ddt	IV
pgrmc13	0	1.27616	0.71	0.114	0	5	pgrmc1	IV
prom1b	0	1.27577	0.494	0.014	0	5	prom1b	IV
qki21	0	1.26298	0.583	0.044	0	5	qki2	IV
zfp36l1b1	0	1.26157	0.53	0.046	0	5	zfp36l1b	IV
sept101	0	1.25927	0.583	0.045	0	5	2021-09-10	IV
phgdh1	0	1.25004	0.535	0.051	0	5	phgdh	IV
tmem471	0	1.24946	0.601	0.072	0	5	tmem47	IV
metrn2	0	1.24177	0.514	0.057	0	5	metrn	IV
gyg1b	0	1.22728	0.305	0.029	0	5	gyg1b	IV
si:dkey-7j14.61	0	1.22608	0.548	0.045	0	5	si:dkey-7j14.6	IV
bgnb	0	1.21975	0.36	0.012	0	5	bgnb	IV
cyp27c1	0	1.219	0.197	0.009	0	5	cyp27c1	IV
GSTZ1	0	1.219	0.609	0.075	0	5	GSTZ1	IV
cyp2p6	0	1.21446	0.392	0.008	0	5	cyp2p6	IV
cxcl12a1	0	1.21427	0.581	0.059	0	5	cxcl12a	IV
fgfr21	0	1.21006	0.504	0.034	0	5	fgfr2	IV
sulf2a	0	1.20772	0.355	0.037	0	5	sulf2a	IV
bckdhbl1	0	1.2041	0.464	0.023	0	5	bckdhbl	IV
angptl43	0	1.19518	0.472	0.065	0	5	angptl4	IV
laptm4b1	0	1.18973	0.733	0.19	0	5	laptm4b	IV
psat11	0	1.18717	0.445	0.043	0	5	psat1	IV
slc27a1b	0	1.18525	0.43	0.009	0	5	slc27a1b	IV
ndnf	0	1.18083	0.437	0.053	0	5	ndnf	IV
tagln3b	0	1.18055	0.417	0.043	0	5	tagln3b	IV
CR751602.21	0	1.14914	0.405	0.049	0	5	CR751602.2	IV
zgc:922871	0	1.14752	0.608	0.083	0	5	zgc:92287	IV
perp1	0	1.14751	0.507	0.041	0	5	perp	IV
cnn3a1	0	1.14165	0.521	0.044	0	5	cnn3a	IV
lpl	0	1.13094	0.445	0.038	0	5	lpl	IV
cd82a4	0	1.13009	0.646	0.088	0	5	cd82a	IV
mpdu1a	0	1.12753	0.448	0.011	0	5	mpdu1a	IV
CU467822.12	0	1.12496	0.813	0.234	0	5	CU467822.1	IV
gas1b1	0	1.12326	0.415	0.048	0	5	gas1b	IV
pon21	0	1.12185	0.476	0.024	0	5	pon2	IV
srgn	0	1.11897	0.452	0.01	0	5	srgn	IV
crabp1a1	0	1.11792	0.375	0.059	0	5	crabp1a	IV
mob1bb	0	1.11723	0.564	0.062	0	5	mob1bb	IV
zgc:920272	0	1.11286	0.571	0.074	0	5	zgc:92027	IV
hopx	0	1.11118	0.522	0.049	0	5	hopx	IV
gpm6bb1	0	1.10908	0.459	0.022	0	5	gpm6bb	IV
nck1a1	0	1.09205	0.421	0.026	0	5	nck1a	IV
her15.14	0	1.08798	0.89	0.253	0	5	her15.1	IV
ivns1abpb1	0	1.08279	0.424	0.053	0	5	ivns1abpb	IV
cish1	0	1.08275	0.46	0.053	0	5	cish	IV
apof	0	1.08084	0.2	0.016	0	5	apof	IV
anxa11b	0	1.08076	0.587	0.085	0	5	anxa11b	IV
ptprz1b	0	1.07757	0.447	0.033	0	5	ptprz1b	IV
ctsd	0	1.07494	0.733	0.171	0	5	ctsd	IV
ppp1r3cb	0	1.07489	0.414	0.022	0	5	ppp1r3cb	IV
vamp33	0	1.06871	0.597	0.078	0	5	vamp3	IV
her94	0	1.06726	0.496	0.113	0	5	her9	IV
spred1	0	1.05979	0.679	0.143	0	5	spred1	IV
her15.24	0	1.05933	0.899	0.272	0	5	her15.2	IV
her8a1	0	1.05335	0.399	0.028	0	5	her8a	IV
notch32	0	1.05011	0.483	0.06	0	5	notch3	IV
zgc:1588521	0	1.05007	0.495	0.048	0	5	zgc:158852	IV
gfap	0	1.04976	0.276	0.018	0	5	gfap	IV
sfxn5b	0	1.04878	0.477	0.039	0	5	sfxn5b	IV
ak3	0	1.04316	0.466	0.033	0	5	ak3	IV
timp4.3	0	1.04214	0.231	0.007	0	5	timp4.3	IV
cldn122	0	1.03395	0.502	0.057	0	5	cldn12	IV
ctdsp11	0	1.02999	0.462	0.035	0	5	ctdsp1	IV
gsta.11	0	1.0273	0.444	0.047	0	5	gsta.1	IV
zgc:85777	0	1.02321	0.448	0.035	0	5	zgc:85777	IV
tdh2	0	1.00518	0.769	0.218	0	5	tdh	IV
sb:cb813	0	1.00454	0.444	0.063	0	5	sb:cb81	IV
DNAJA42	0	0.998381	0.444	0.068	0	5	DNAJA4	IV
mboat1	0	0.997734	0.359	0.007	0	5	mboat1	IV
rhbg	0	0.997216	0.177	0.003	0	5	rhbg	IV
zgc:101744	0	0.993377	0.37	0.007	0	5	zgc:101744	IV
mgst3b	0	0.991268	0.842	0.311	0	5	mgst3b	IV
rftn2	0	0.987482	0.409	0.018	0	5	rftn2	IV
eif4ebp3l3	0	0.98726	0.475	0.078	0	5	eif4ebp3l	IV
gpc41	0	0.985368	0.421	0.03	0	5	gpc4	IV
prtfdc11	0	0.985174	0.433	0.037	0	5	prtfdc1	IV
mmp2	0	0.983501	0.356	0.01	0	5	mmp2	IV
slc25a48	0	0.978619	0.361	0.009	0	5	slc25a48	IV
cyb5a	0	0.975324	0.418	0.023	0	5	cyb5a	IV
idh1	0	0.972978	0.514	0.082	0	5	idh1	IV
mcl1b4	0	0.972769	0.609	0.167	0	5	mcl1b	IV
si:ch211-212k18.52	0	0.971012	0.453	0.053	0	5	si:ch211-212k18.5	IV
boc1	0	0.969832	0.395	0.054	0	5	boc	IV
id33	0	0.968512	0.485	0.096	0	5	id3	IV
cbr1l	0	0.960384	0.354	0.019	0	5	cbr1l	IV
si:dkey-204f11.64	0	0.956885	0.425	0.026	0	5	si:dkey-204f11.64	IV
elovl21	0	0.953633	0.342	0.026	0	5	elovl2	IV
cdkn1a1	0	0.950914	0.403	0.048	0	5	cdkn1a	IV
gng12a	0	0.95011	0.399	0.026	0	5	gng12a	IV
acadl	0	0.948668	0.541	0.09	0	5	acadl	IV
zgc:1103391	0	0.93622	0.416	0.035	0	5	zgc:110339	IV
gstt1b	0	0.929993	0.374	0.021	0	5	gstt1b	IV
itm2ba1	0	0.929659	0.909	0.434	0	5	itm2ba	IV
slc25a18	0	0.920448	0.388	0.021	0	5	slc25a18	IV
rgcc1	0	0.920326	0.272	0.039	0	5	rgcc	IV
cyr611	0	0.919192	0.319	0.035	0	5	cyr61	IV
aoc2	0	0.91887	0.297	0.023	0	5	aoc2	IV
vamp5	0	0.918251	0.29	0.014	0	5	vamp5	IV
CABZ01079011.13	0	0.915529	0.634	0.154	0	5	CABZ01079011.1	IV
slc1a3b	0	0.914728	0.298	0.016	0	5	slc1a3b	IV
tmem1761	0	0.904423	0.38	0.024	0	5	tmem176	IV
slc35f6	0	0.904359	0.476	0.06	0	5	slc35f6	IV
BX510923.1	0	0.904262	0.389	0.024	0	5	BX510923.1	IV
metrnl1	0	0.903983	0.408	0.063	0	5	metrnl	IV
ssuh2rs1	0	0.900277	0.4	0.037	0	5	ssuh2rs1	IV
fam171a2a	0	0.889861	0.414	0.036	0	5	fam171a2a	IV
cyp2p7	0	0.888164	0.297	0.005	0	5	cyp2p7	IV
rpz5	0	0.887285	0.439	0.051	0	5	rpz5	IV
cyp2ad2	0	0.885348	0.186	0.003	0	5	cyp2ad2	IV
sgk12	0	0.883939	0.419	0.074	0	5	sgk1	IV
pald1b	0	0.881153	0.348	0.016	0	5	pald1b	IV
fzd7a1	0	0.880568	0.377	0.051	0	5	fzd7a	IV
prex1	0	0.879595	0.35	0.019	0	5	prex1	IV
selenot1b	0	0.876778	0.55	0.105	0	5	selenot1b	IV
pygmb1	0	0.876489	0.617	0.137	0	5	pygmb	IV
mob1a1	0	0.870286	0.403	0.042	0	5	mob1a	IV
rgma1	0	0.869909	0.581	0.136	0	5	rgma	IV
litaf	0	0.868954	0.362	0.024	0	5	litaf	IV
phyhd1	0	0.86733	0.335	0.029	0	5	phyhd1	IV
sypl2a1	0	0.863852	0.387	0.027	0	5	sypl2a	IV
proza	0	0.859818	0.625	0.151	0	5	proza	IV
slc6a11b	0	0.85851	0.319	0.005	0	5	slc6a11b	IV
vamp8	0	0.856099	0.324	0.011	0	5	vamp8	IV
si:dkey-188i13.11	0	0.852229	0.427	0.057	0	5	si:dkey-188i13.11	IV
rgs5a	0	0.848678	0.176	0.008	0	5	rgs5a	IV
gstk1	0	0.846244	0.476	0.073	0	5	gstk1	IV
ucp1	0	0.843813	0.251	0.005	0	5	ucp1	IV
mych3	0	0.84293	0.418	0.084	0	5	mych	IV
NPAS31	0	0.842146	0.521	0.095	0	5	NPAS3	IV
cat	0	0.840398	0.412	0.044	0	5	cat	IV
mgst1.1	0	0.840202	0.326	0.012	0	5	mgst1.1	IV
lfng4	0	0.830031	0.586	0.134	0	5	lfng	IV
sox22	0	0.828567	0.415	0.06	0	5	sox2	IV
aldob1	0	0.824478	0.36	0.051	0	5	aldob	IV
rassf2a1	0	0.823986	0.547	0.102	0	5	rassf2a	IV
nudt51	0	0.82087	0.463	0.074	0	5	nudt5	IV
ca8	0	0.82028	0.384	0.019	0	5	ca8	IV
cldn7a	0	0.814261	0.163	0.008	0	5	cldn7a	IV
gpx4a	0	0.811048	0.588	0.144	0	5	gpx4a	IV
sdc43	0	0.810367	0.619	0.146	0	5	sdc4	IV
slc7a11	0	0.802168	0.145	0.002	0	5	slc7a11	IV
carhsp11	0	0.800734	0.365	0.039	0	5	carhsp1	IV
sox19b1	0	0.800571	0.273	0.022	0	5	sox19b	IV
yap11	0	0.79907	0.355	0.035	0	5	yap1	IV
cnn21	0	0.79547	0.36	0.042	0	5	cnn2	IV
eif4ebp33	0	0.79509	0.378	0.071	0	5	eif4ebp3	IV
f3b1	0	0.791509	0.263	0.032	0	5	f3b	IV
bcan	0	0.787916	0.328	0.018	0	5	bcan	IV
eci2	0	0.78321	0.349	0.029	0	5	eci2	IV
si:ch211-119e14.1	0	0.782207	0.217	0.005	0	5	si:ch211-119e14.1	IV
adrb2a	0	0.774675	0.295	0.015	0	5	adrb2a	IV
tspan33a1	0	0.771949	0.29	0.02	0	5	tspan33a	IV
nrarpa1	0	0.771729	0.35	0.055	0	5	nrarpa	IV
snap23.1	0	0.764913	0.321	0.025	0	5	snap23.1	IV
cyp2aa4	0	0.759158	0.241	0.006	0	5	cyp2aa4	IV
wasf3b1	0	0.758162	0.452	0.077	0	5	wasf3b	IV
si:dkey-34d22.1	0	0.758104	0.286	0.009	0	5	si:dkey-34d22.1	IV
sgms1	0	0.757987	0.316	0.013	0	5	sgms1	IV
pon3.21	0	0.757049	0.308	0.025	0	5	pon3.2	IV
psph	0	0.755859	0.258	0.024	0	5	psph	IV
rac1a3	0	0.755227	0.447	0.086	0	5	rac1a	IV
lrp8	0	0.74168	0.36	0.044	0	5	lrp8	IV
lrig11	0	0.738778	0.334	0.035	0	5	lrig1	IV
wnt7bb	0	0.737331	0.27	0.02	0	5	wnt7bb	IV
swap70b	0	0.736055	0.35	0.025	0	5	swap70b	IV
capn1a	0	0.734953	0.393	0.052	0	5	capn1a	IV
fads22	0	0.730012	0.376	0.061	0	5	fads2	IV
cebpb	0	0.729664	0.324	0.045	0	5	cebpb	IV
pcxa	0	0.722451	0.371	0.05	0	5	pcxa	IV
eef1da4	0	0.721434	0.626	0.16	0	5	eef1da	IV
dock8	0	0.717933	0.259	0.007	0	5	dock8	IV
pora	0	0.708762	0.407	0.065	0	5	pora	IV
hey2	0	0.707311	0.196	0.01	0	5	hey2	IV
tmed5	0	0.705003	0.313	0.022	0	5	tmed5	IV
si:ch211-67e16.11	0	0.701114	0.152	0.008	0	5	si:ch211-67e16.11	IV
pik3r2	0	0.700469	0.325	0.036	0	5	pik3r2	IV
ston2	0	0.693557	0.298	0.021	0	5	ston2	IV
slc27a1a	0	0.692724	0.288	0.016	0	5	slc27a1a	IV
sept121	0	0.691723	0.346	0.052	0	5	2021-09-12	IV
ptprfb	0	0.681095	0.35	0.057	0	5	ptprfb	IV
rfx2	0	0.679175	0.333	0.042	0	5	rfx2	IV
podxl1	0	0.67724	0.259	0.034	0	5	podxl	IV
pbxip1b1	0	0.673249	0.338	0.034	0	5	pbxip1b	IV
adi11	0	0.669244	0.345	0.047	0	5	adi1	IV
FAT4	0	0.6692	0.22	0.016	0	5	FAT4	IV
cib11	0	0.668891	0.296	0.03	0	5	cib1	IV
plxnb1b	0	0.66724	0.277	0.015	0	5	plxnb1b	IV
sc:d189	0	0.666105	0.197	0.005	0	5	sc:d189	IV
sncga	0	0.660898	0.199	0.021	0	5	sncga	IV
sgk3	0	0.659851	0.286	0.029	0	5	sgk3	IV
tpi1a	0	0.656082	0.341	0.046	0	5	tpi1a	IV
rgs12b	0	0.646418	0.32	0.037	0	5	rgs12b	IV
phf24	0	0.644595	0.357	0.049	0	5	phf24	IV
decr1	0	0.644167	0.288	0.027	0	5	decr1	IV
mob3a1	0	0.636723	0.32	0.041	0	5	mob3a	IV
zgc:101723	0	0.636114	0.272	0.025	0	5	zgc:101723	IV
ddah21	0	0.632874	0.281	0.026	0	5	ddah2	IV
atp6v1e1a1	0	0.631989	0.287	0.031	0	5	atp6v1e1a	IV
ttyh3a	0	0.631281	0.351	0.05	0	5	ttyh3a	IV
pard6gb	0	0.628447	0.261	0.02	0	5	pard6gb	IV
acaa2	0	0.626127	0.379	0.065	0	5	acaa2	IV
aldh1l1	0	0.624832	0.244	0.016	0	5	aldh1l1	IV
gcshb1	0	0.624266	0.272	0.022	0	5	gcshb	IV
rgmd	0	0.61894	0.236	0.019	0	5	rgmd	IV
tmem184ba1	0	0.616662	0.317	0.043	0	5	tmem184ba	IV
prss23	0	0.614583	0.211	0.009	0	5	prss23	IV
vstm4a	0	0.610958	0.21	0.006	0	5	vstm4a	IV
epb41l5	0	0.603095	0.298	0.038	0	5	epb41l5	IV
tsku	0	0.589455	0.217	0.008	0	5	tsku	IV
smad1	0	0.589189	0.24	0.02	0	5	smad1	IV
sort1a1	0	0.588508	0.27	0.034	0	5	sort1a	IV
ccng14	0	0.587966	0.67	0.183	0	5	ccng1	IV
zgc:174888	0	0.587823	0.241	0.019	0	5	zgc:174888	IV
rnf128a	0	0.587154	0.244	0.018	0	5	rnf128a	IV
zgc:194659	0	0.586863	0.32	0.05	0	5	zgc:194659	IV
entpd1	0	0.575245	0.215	0.013	0	5	entpd1	IV
si:ch211-180a12.2	0	0.570149	0.233	0.006	0	5	si:ch211-180a12.2	IV
gpsm21	0	0.568224	0.243	0.027	0	5	gpsm2	IV
mylipb	0	0.565843	0.214	0.018	0	5	mylipb	IV
rflnb	0	0.563754	0.164	0.007	0	5	rflnb	IV
pleca	0	0.562888	0.253	0.028	0	5	pleca	IV
ccdc3b	0	0.560621	0.135	0.003	0	5	ccdc3b	IV
zgc:77439	0	0.559548	0.288	0.032	0	5	zgc:77439	IV
itgb5	0	0.558962	0.21	0.009	0	5	itgb5	IV
amt	0	0.555765	0.225	0.016	0	5	amt	IV
f3a	0	0.554934	0.208	0.014	0	5	f3a	IV
bnip4	0	0.551404	0.231	0.025	0	5	bnip4	IV
sytl1	0	0.550746	0.199	0.006	0	5	sytl1	IV
mfap21	0	0.547928	0.241	0.027	0	5	mfap2	IV
hhatla	0	0.546399	0.2	0.006	0	5	hhatla	IV
sult2st3	0	0.544151	0.157	0.009	0	5	sult2st3	IV
st8sia6	0	0.5436	0.22	0.019	0	5	st8sia6	IV
sdr16c5a	0	0.5421	0.225	0.012	0	5	sdr16c5a	IV
hbegfa	0	0.541324	0.177	0.015	0	5	hbegfa	IV
retsat	0	0.540349	0.279	0.038	0	5	retsat	IV
anxa3b	0	0.536553	0.262	0.036	0	5	anxa3b	IV
acaa1	0	0.535192	0.267	0.026	0	5	acaa1	IV
crot	0	0.535011	0.24	0.02	0	5	crot	IV
enpp6	0	0.534924	0.183	0.003	0	5	enpp6	IV
si:ch211-212k18.9	0	0.533148	0.228	0.018	0	5	si:ch211-212k18.9	IV
eno3	0	0.53202	0.231	0.029	0	5	eno3	IV
sdr16c5b	0	0.530756	0.201	0.016	0	5	sdr16c5b	IV
zgc:63972	0	0.52908	0.192	0.008	0	5	zgc:63972	IV
crtap	0	0.527086	0.215	0.016	0	5	crtap	IV
hs3st3b1b	0	0.525237	0.186	0.016	0	5	hs3st3b1b	IV
rasgrp4	0	0.524734	0.22	0.01	0	5	rasgrp4	IV
TST	0	0.521952	0.281	0.035	0	5	TST	IV
pros1	0	0.521308	0.215	0.011	0	5	pros1	IV
tnk1	0	0.519914	0.209	0.016	0	5	tnk1	IV
ryk	0	0.51778	0.24	0.028	0	5	ryk	IV
stxbp3	0	0.516398	0.204	0.017	0	5	stxbp3	IV
ugt1b5	0	0.516012	0.189	0.008	0	5	ugt1b5	IV
fmo5	0	0.509647	0.201	0.015	0	5	fmo5	IV
zgc:92630	0	0.509315	0.138	0.009	0	5	zgc:92630	IV
pacsin3	0	0.507992	0.208	0.014	0	5	pacsin3	IV
clic1	0	0.507238	0.215	0.013	0	5	clic1	IV
igf2b	0	0.50458	0.149	0.009	0	5	igf2b	IV
stom	0	0.500131	0.264	0.034	0	5	stom	IV
slc13a5a	0	0.498657	0.158	0.008	0	5	slc13a5a	IV
siae	0	0.495059	0.191	0.008	0	5	siae	IV
rgn	0	0.493504	0.175	0.009	0	5	rgn	IV
rnaseka	0	0.493222	0.218	0.022	0	5	rnaseka	IV
arhgap42a	0	0.49129	0.216	0.02	0	5	arhgap42a	IV
phkg2	0	0.491227	0.251	0.031	0	5	phkg2	IV
dhrs9	0	0.491016	0.191	0.007	0	5	dhrs9	IV
inpp5b	0	0.490886	0.233	0.02	0	5	inpp5b	IV
cyp1b1	0	0.489236	0.158	0.002	0	5	cyp1b1	IV
cyp2ad6	0	0.481069	0.168	0.004	0	5	cyp2ad6	IV
anxa11a	0	0.48088	0.215	0.023	0	5	anxa11a	IV
gnmt	0	0.478377	0.215	0.018	0	5	gnmt	IV
arhgef10la	0	0.472418	0.226	0.022	0	5	arhgef10la	IV
cyfip1	0	0.471952	0.177	0.014	0	5	cyfip1	IV
fzd7b	0	0.470415	0.188	0.019	0	5	fzd7b	IV
cyp1d1	0	0.468341	0.165	0.014	0	5	cyp1d1	IV
aldh9a1b	0	0.467764	0.154	0.011	0	5	aldh9a1b	IV
PAMR1 (1 of many)	0	0.466951	0.18	0.002	0	5	PAMR1 (1 of many)	IV
mtmr10	0	0.464352	0.194	0.012	0	5	mtmr10	IV
FP101882.1	0	0.463276	0.185	0.017	0	5	FP101882.1	IV
cblc	0	0.459711	0.16	0.001	0	5	cblc	IV
tmem37	0	0.45906	0.167	0.003	0	5	tmem37	IV
slc9a3r1a	0	0.458317	0.19	0.014	0	5	slc9a3r1a	IV
ugt5b3	0	0.458217	0.143	0.004	0	5	ugt5b3	IV
zgc:162780	0	0.457831	0.189	0.009	0	5	zgc:162780	IV
adra1bb	0	0.453583	0.139	0.002	0	5	adra1bb	IV
slitrk2	0	0.452842	0.22	0.025	0	5	slitrk2	IV
lamb2l	0	0.452377	0.181	0.012	0	5	lamb2l	IV
sall1a	0	0.45221	0.216	0.019	0	5	sall1a	IV
pnpla7b	0	0.448762	0.184	0.008	0	5	pnpla7b	IV
adprh	0	0.445905	0.168	0.007	0	5	adprh	IV
asah1b	0	0.445733	0.216	0.02	0	5	asah1b	IV
bmp1b	0	0.443803	0.158	0.006	0	5	bmp1b	IV
sall3b	0	0.441981	0.205	0.014	0	5	sall3b	IV
fam46bb	0	0.440247	0.179	0.011	0	5	fam46bb	IV
plekhg4	0	0.436573	0.194	0.019	0	5	plekhg4	IV
sat1b	0	0.43516	0.165	0.011	0	5	sat1b	IV
slc47a1	0	0.435073	0.178	0.011	0	5	slc47a1	IV
fgd6	0	0.432965	0.186	0.007	0	5	fgd6	IV
rbp1	0	0.425625	0.12	0.004	0	5	rbp1	IV
si:ch73-288o11.5	0	0.424781	0.168	0.005	0	5	si:ch73-288o11.5	IV
kcnj13	0	0.423724	0.174	0.003	0	5	kcnj13	IV
msrb3	0	0.420126	0.16	0.008	0	5	msrb3	IV
slc15a2	0	0.418744	0.151	0.006	0	5	slc15a2	IV
pycard	0	0.4177	0.138	0.008	0	5	pycard	IV
tnfsf10l	0	0.417414	0.16	0.01	0	5	tnfsf10l	IV
ccdc173	0	0.411303	0.154	0.007	0	5	ccdc173	IV
arrdc2	0	0.410866	0.151	0.012	0	5	arrdc2	IV
cmbl	0	0.41077	0.178	0.014	0	5	cmbl	IV
cyp2v1	0	0.404419	0.162	0.012	0	5	cyp2v1	IV
plcd3a	0	0.402512	0.164	0.008	0	5	plcd3a	IV
zgc:110591	0	0.399295	0.147	0.011	0	5	zgc:110591	IV
tmem176l.3a	0	0.397262	0.158	0.011	0	5	tmem176l.3a	IV
slc2a12	0	0.396798	0.153	0.006	0	5	slc2a12	IV
card19	0	0.393802	0.15	0.012	0	5	card19	IV
nipsnap3a	0	0.39293	0.155	0.009	0	5	nipsnap3a	IV
zgc:63587	0	0.391162	0.161	0.01	0	5	zgc:63587	IV
si:ch211-212k18.7	0	0.388608	0.122	0.007	0	5	si:ch211-212k18.7	IV
frya	0	0.382332	0.159	0.01	0	5	frya	IV
pdk2b	0	0.374827	0.142	0.01	0	5	pdk2b	IV
abhd14b	0	0.371972	0.141	0.006	0	5	abhd14b	IV
eepd1	0	0.367568	0.137	0.009	0	5	eepd1	IV
si:ch211-175m2.5	0	0.366269	0.147	0.01	0	5	si:ch211-175m2.5	IV
npas1	0	0.366218	0.184	0.017	0	5	npas1	IV
cox5b2	0	0.365521	0.106	0.004	0	5	cox5b2	IV
stard13b	0	0.360801	0.156	0.012	0	5	stard13b	IV
galns	0	0.36045	0.135	0.005	0	5	galns	IV
lrp2a	0	0.344832	0.137	0.008	0	5	lrp2a	IV
rpe65b	0	0.344624	0.113	0.006	0	5	rpe65b	IV
si:ch211-191a24.4	0	0.337504	0.138	0.008	0	5	si:ch211-191a24.4	IV
si:ch211-103b1.2	0	0.334093	0.12	0.002	0	5	si:ch211-103b1.2	IV
selenbp1	0	0.332266	0.134	0.007	0	5	selenbp1	IV
mat1a	0	0.322651	0.122	0.008	0	5	mat1a	IV
amotl2b	0	0.318942	0.126	0.008	0	5	amotl2b	IV
CR450686.1	0	0.317995	0.102	0.002	0	5	CR450686.1	IV
slc51a	0	0.313345	0.112	0.003	0	5	slc51a	IV
nqo1	0	0.294777	0.111	0.004	0	5	nqo1	IV
p2ry1	0	0.2912	0.122	0.008	0	5	p2ry1	IV
CABZ01049847.1	0	0.287607	0.113	0.002	0	5	CABZ01049847.1	IV
si:dkey-246e1.3	0	0.275659	0.104	0.001	0	5	si:dkey-246e1.3	IV
ssfa2	0	0.266402	0.109	0.004	0	5	ssfa2	IV
hvcn1	1.26515e-306	0.349712	0.144	0.011	2.18087e-302	5	hvcn1	IV
sult1st1	1.47026e-305	0.420609	0.111	0.006	2.53443e-301	5	sult1st1	IV
ptprz1a1	1.97867e-305	0.60224	0.226	0.029	3.41083e-301	5	ptprz1a	IV
pkp3b	3.22001e-304	0.284173	0.122	0.008	5.55066e-300	5	pkp3b	IV
zgc:174863	3.41079e-303	0.405224	0.146	0.012	5.87952e-299	5	zgc:174863	IV
socs3a1	4.49644e-303	0.85282	0.277	0.042	7.75097e-299	5	socs3a	IV
sh2d3cb	5.98298e-302	0.292413	0.115	0.007	1.03135e-297	5	sh2d3cb	IV
auts2b	3.16022e-299	0.566696	0.252	0.035	5.44759e-295	5	auts2b	IV
tspo	1.5015e-298	0.592566	0.334	0.059	2.58828e-294	5	tspo	IV
mfsd8	2.90022e-294	0.512632	0.242	0.033	4.9994e-290	5	mfsd8	IV
si:ch211-269k10.2	2.96834e-293	0.377868	0.148	0.013	5.11683e-289	5	si:ch211-269k10.2	IV
rnaset2	7.47587e-293	0.515423	0.314	0.053	1.28869e-288	5	rnaset2	IV
cd151l1	1.81409e-292	0.533538	0.271	0.041	3.12713e-288	5	cd151l	IV
serpine21	2.35475e-291	0.501573	0.253	0.036	4.05911e-287	5	serpine2	IV
mhc1zba	4.04335e-287	0.624196	0.339	0.062	6.96993e-283	5	mhc1zba	IV
amdhd2	1.11122e-285	0.444693	0.209	0.025	1.91552e-281	5	amdhd2	IV
smo1	2.12408e-284	0.452409	0.203	0.025	3.66149e-280	5	smo	IV
bckdha	3.18784e-283	0.670163	0.49	0.119	5.4952e-279	5	bckdha	IV
plekho2	3.25292e-283	0.275133	0.121	0.008	5.60739e-279	5	plekho2	IV
grm2b	6.87777e-283	0.873554	0.364	0.072	1.18559e-278	5	grm2b	IV
sgpl1	8.4246e-283	0.355373	0.155	0.014	1.45223e-278	5	sgpl1	IV
glud1b	1.05331e-281	0.848312	0.686	0.221	1.8157e-277	5	glud1b	IV
tjp2b	2.56514e-281	0.434594	0.193	0.022	4.42179e-277	5	tjp2b	IV
[truncated: 2,192 more rows]
