# Supplementary material for: The landscape of regulatory genes in brain-wide neuronal phenotypes of a vertebrate brain
Source: eLife. 2021 Dec 13;10:e68224. doi: 10.7554/eLife.68224 (PMC8769648; doi:10.7554/eLife.68224)
Supplement: Figure 2—source data 1. [file elife-68224-fig2-data1.xlsx]

## Sheet: Sheet1
cells	1	2	3	4	5	6	7	8	9	10	11	12	13	14	15	16
	slc17a6a	slc6a3	drd2b	mab21l2	gad2	en2a	gad1b	th	drd1b	slc17a6b	dlx5a	hoxb5b	drd2a	tph2	dbh	foxg1a
1	2	7	170	18	417	26	362	7	0	7	62	7	8	576	8	4	5-HT,GABA
2	1	5	20	7	537	1	36	7	0	5	251	2	23	64	1	5	5-HT,subOT,GABA
3	1	8	48	53	426	20	436	20	3	13	209	3	14	60	3	14	DA,subOT,GABA
4	0	3	5	5	41	0	25	1	0	1	16	0	1	391	5	1	5-HT,GABA
5	0	4	34	2	315	13	353	3	0	2	37	2	1	62	7	6	5-HT,GABA
6	29	3	47	98	50	1	48	160	1	127	48	162	6	61	291	6	NE,vglut, hindbrain
7	55	7	101	11	61	0	25	210	6	177	34	0	1	49	1	6	DA,subOT,GLU
8	1	3	2	9	54	1	31	5	0	8	40	8	1	43	5	4	5-HT,hind,GABA
9	0	1	28	4	169	1	181	1	0	2	16	0	0	43	2	2	5-HT,GABA
10	0	0	26	2	159	1	30	1	0	4	18	4	1	203	1	0	5-HT,GABA
11	0	10	93	4	199	0	205	108	1	5	18	0	0	30	4	2	DA,GABA
12	11	3	13	6	104	0	22	4	0	2	11	5	6	157	2	1	5-HT,GABA
13	0	5	33	0	195	37	198	4	0	1	13	1	2	206	3	4	5-HT,subOT,GABA
14	0	0	2	1	21	0	15	3	1	2	18	0	1	154	1	1	5-HT,GABA
15	0	2	18	0	93	0	117	1	0	1	10	0	0	69	0	1	5-HT,GABA
16	0	0	1	2	17	0	10	1	0	0	3	1	0	22	0	0	5-HT
17	0	4	64	104	104	0	98	3	2	1	6	1	8	21	2	0	DA,OT,GABA
18	19	13	45	2	24	0	17	96	0	75	17	0	34	27	3	1	DA,GLU
19	0	1	11	2	5	0	9	1	1	2	2	2	0	68	1	0	5-HT
20	0	1	9	0	35	0	38	32	0	0	58	0	9	10	0	0	DA,subOT,GABA
21	0	1	13	1	39	0	37	21	0	0	40	0	1	4	1	0	DA,subOT,GABA
22	0	2	1	2	6	0	5	1	0	1	4	0	0	15	1	0	5-HT,GABA
expression	1	2	3	4	5	6	7	8	9	10	11	12	13	14	15	16
	slc17a6a	slc6a3	drd2b	mab21l2	gad2	en2a	gad1b	th	drd1b	slc17a6b	dlx5a	hoxb5b	drd2a	tph2	dbh	foxg1a
1	3	7	262	28	1858	34	1644	12	0	11	75	7	8	17213	8	4	5-HT,GABA	1
2	1	5	21	29	2299	1	81	7	0	9	703	2	25	148	1	5	5-HT,subOT,GABA	2
3	1	8	60	172	1833	38	2116	25	3	21	624	10	16	70	4	20	DA,subOT,GABA	3
4	0	3	6	5	76	0	30	1	0	1	16	0	1	2452	5	1	5-HT,GABA	4
5	0	4	45	2	996	18	3797	3	0	4	61	2	1	130	7	10	5-HT,GABA	5
6	31	3	67	170	144	1	125	315	1	182	74	565	6	127	2338	8	NE,vglut, hindbrain	6
7	58	7	145	14	95	0	65	466	6	340	39	0	1	53	1	7	DA,subOT,GLU	7
8	1	3	2	15	142	1	73	8	0	9	69	18	1	132	31	4	5-HT,hind,GABA	8
9	0	1	56	4	549	1	695	1	0	2	18	0	0	56	2	2	5-HT,GABA	9
10	0	0	41	5	436	1	70	1	0	6	18	13	1	3027	1	0	5-HT,GABA	10
11	0	11	170	5	1038	0	1015	181	1	6	21	0	0	42	4	2	DA,GABA	11
12	1	3	13	6	1181	0	41	4	0	3	11	7	7	1277	2	1	5-HT,GABA	12
13	0	5	47	0	1054	62	1700	7	0	2	18	1	2	2820	3	4	5-HT,subOT,GABA	13
14	0	0	3	1	58	0	19	3	1	4	23	0	1	547	1	1	5-HT,GABA	14
15	0	2	18	0	207	0	809	1	0	1	10	0	0	215	0	2	5-HT,GABA	15
16	0	0	1	2	22	0	10	1	0	0	3	1	0	29	0	0	5-HT	16
17	0	4	147	464	825	0	504	3	2	1	7	1	9	21	2	0	DA,OT,GABA	17
18	20	14	62	2	47	0	35	616	0	206	23	0	49	45	3	1	DA,GLU	18
19	0	1	13	13	5	0	21	1	1	2	4	2	0	622	1	0	5-HT	19
20	0	1	11	0	74	0	65	57	0	0	176	0	9	13	0	0	DA,subOT,GABA	20
21	0	1	20	6	200	0	95	40	0	0	147	0	1	4	2	0	DA,subOT,GABA	21
22	0	2	1	2	18	0	15	2	0	1	5	0	0	58	1	0	5-HT,GABA	22
