# Supplementary material for: The landscape of regulatory genes in brain-wide neuronal phenotypes of a vertebrate brain
Source: eLife. 2021 Dec 13;10:e68224. doi: 10.7554/eLife.68224 (PMC8769648; doi:10.7554/eLife.68224)
Supplement: Figure 4—source data 1. [file elife-68224-fig4-data1.xlsx]

## Sheet: Sheet1
number	cluster1	cluster 2	cluster 3	cluster 4	cluster 5	cluster 6	cluster 7	cluster 8	cluster 9	cluster 10	cluster 11
zic1	11	55	13	2	4	3	2	4	76	0	0
zbtb18	26	11	9	6	27	5	84	5	4	0	0
en2b	54	99	193	59	55	84	2	91	22	18	1
calb2a	286	53	33	48	35	7	48	1	5	24	35
synpr	11	5	1	1	4	1	2	0	0	0	0
bhlhe22	15	14	14	6	9	3	109	0	0	5	0
kctd4	159	196	106	56	29	74	39	24	20	11	2
pdyn	12	43	0	3	1	3	0	1	0	0	0
foxb1a	191	31	97	284	42	11	31	4	4	1	1
irx1a	32	34	44	5	32	8	20	2	13	11	11
sum_gene	cluster1	cluster 2	cluster 3	cluster 4	cluster 5	cluster 6	cluster 7	cluster 8	cluster 9	cluster 10	cluster 11
zic1	14	94	17	3	6	5	2	4	203	0	0
zbtb18	29	11	9	8	99	5	188	6	5	0	0
en2b	61	204	297	77	82	177	2	192	65	25	1
calb2a	1298	205	103	85	83	8	204	1	11	54	212
synpr	17	7	1	1	5	3	2	0	0	0	0
bhlhe22	18	18	14	6	13	4	353	0	0	5	0
kctd4	250	597	264	94	48	347	55	29	30	16	4
pdyn	14	154	0	3	1	5	0	1	0	0	0
foxb1a	610	80	436	1408	143	23	82	4	14	1	1
irx1a	48	73	64	6	52	8	30	3	24	22	18
	cluster1	cluster 2	cluster 3	cluster 4	cluster 5	cluster 6	cluster 7	cluster 8	cluster 9	cluster 10	cluster 11
sum cell number	920	629	605	432	340	277	237	222	97	81	43
number/sum	1	2	3	4	5	6	7	8	9	10	11	5% cells
zic1	0.0119565	0.0874404	0.0214876	0.00462963	0.0117647	0.0108303	0.00843882	0.018018	0.783505	0	0	2,9
zbtb18	0.0282609	0.0174881	0.014876	0.0138889	0.0794118	0.0180505	0.35443	0.0225225	0.0412371	0	0	5,7
en2b	0.0586957	0.157393	0.319008	0.136574	0.161765	0.303249	0.00843882	0.40991	0.226804	0.222222	0.0232558	1,2,3,4,5,6,8,9,10
calb2a	0.31087	0.0842607	0.0545455	0.111111	0.102941	0.0252708	0.202532	0.0045045	0.0515464	0.296296	0.813953	1,2,3,4,5,7,8,10,11
synpr	0.0119565	0.00794913	0.00165289	0.00231481	0.0117647	0.00361011	0.00843882	0	0	0	0
bhlhe22	0.0163043	0.0222576	0.0231405	0.0138889	0.0264706	0.0108303	0.459916	0	0	0.0617284	0	10
kctd4	0.172826	0.311606	0.175207	0.12963	0.0852941	0.267148	0.164557	0.108108	0.206186	0.135802	0.0465116	1,2,3,4,5,6,7,8,9,10
pdyn	0.0130435	0.0683625	0	0.00694444	0.00294118	0.0108303	0	0.0045045	0	0	0	2
foxb1a	0.207609	0.0492846	0.160331	0.657407	0.123529	0.0397112	0.130802	0.018018	0.0412371	0.0123457	0.0232558	1,3,4,5,7
irx1a	0.0347826	0.0540541	0.0727273	0.0115741	0.0941176	0.0288809	0.0843882	0.00900901	0.134021	0.135802	0.255814	2,3,5,7,9,10,11
Averge gene	1	2	3	4	5	6	7	8	9	10	11	averge gene expression
zic1	1.27273	1.70909	1.30769	1.5	1.5	1.66667	1	1	2.67105	0	0	9
zbtb18	1.11538	1	1	1.33333	3.66667	1	2.2381	1.2	1.25	0	0	5,7
en2b	1.12963	2.06061	1.53886	1.30508	1.49091	2.10714	1	2.10989	2.95455	1.38889	1	2,6,8,9
calb2a	4.53846	3.86792	3.12121	1.77083	2.37143	1.14286	4.25	1	2.2	2.25	6.05714	1,2,3,5,7,9,10,11
synpr	1.54545	1.4	1	1	1.25	3	1	0	0	0	0	6
bhlhe22	1.2	1.28571	1	1	1.44444	1.33333	3.23853	0	0	1	0	7
kctd4	1.57233	3.04592	2.49057	1.67857	1.65517	4.68919	1.41026	1.20833	1.5	1.45455	2	2,3,6,11
pdyn	1.16667	3.5814	0	1	1	1.66667	0	1	0	0	0	2
foxb1a	3.19372	2.58065	4.49485	4.95775	3.40476	2.09091	2.64516	1	3.5	1	1	1,2,3,4,5,6,7,9
irx1a	1.5	2.14706	1.45455	1.2	1.625	1	1.5	1.5	1.84615	2	1.63636	2,10
	Final
gene	Cluster1	Cluster2	Cluster3	Cluster4	Cluster5	Cluster6	Cluster7	Cluster8	Cluster9	Cluster10	Cluster11	zic1	2,9
calb2a	1	1	1	1	1	0	1	1	1	1	1	zbtb18	5,7
en2b	1	1	1	1	1	1	0	1	1	1	0	en2b	1,2,3,4,5,6,8,9,10
irx1a	0	1	1	0	1	0	1	0	1	1	1	calb2a	1,2,3,4,5,7,8,9,10,11
kctd4	1	1	1	1	1	1	1	1	1	1	1	synpr	6
foxb1a	1	1	1	1	1	1	1	0	1	0	0	bhlhe22	7,10
zic1	0	1	0	0	0	0	0	0	1	0	0	kctd4	1,2,3,4,5,6,7,8,9,10,11
bhlhe22	0	0	0	0	0	0	1	0	0	1	0	pdyn	2
zbtb18	0	0	0	0	1	0	1	0	0	0	0	foxb1a	1,2,3,4,5,6,7,9
pdyn	0	1	0	0	0	0	0	0	0	0	0	irx1a	2,3,5,7,9,10,11

## Sheet: Sheet2
number/sum	1	2	3	4	5	6	7	8	9	10	11	5% cells
zic1	0.0119565	0.0874404	0.0214876	0.00462963	0.0117647	0.0108303	0.00843882	0.018018	0.783505	0	0	2,9
zbtb18	0.0282609	0.0174881	0.014876	0.0138889	0.0794118	0.0180505	0.35443	0.0225225	0.0412371	0	0	5,7
en2b	0.0586957	0.157393	0.319008	0.136574	0.161765	0.303249	0.00843882	0.40991	0.226804	0.222222	0.0232558	1,2,3,4,5,6,8,9,10
calb2a	0.31087	0.0842607	0.0545455	0.111111	0.102941	0.0252708	0.202532	0.0045045	0.0515464	0.296296	0.813953	1,2,3,4,5,7,8,10,11
synpr	0.0119565	0.00794913	0.00165289	0.00231481	0.0117647	0.00361011	0.00843882	0	0	0	0
bhlhe22	0.0163043	0.0222576	0.0231405	0.0138889	0.0264706	0.0108303	0.459916	0	0	0.0617284	0	10
kctd4	0.172826	0.311606	0.175207	0.12963	0.0852941	0.267148	0.164557	0.108108	0.206186	0.135802	0.0465116	1,2,3,4,5,6,7,8,9,10
pdyn	0.0130435	0.0683625	0	0.00694444	0.00294118	0.0108303	0	0.0045045	0	0	0	2
foxb1a	0.207609	0.0492846	0.160331	0.657407	0.123529	0.0397112	0.130802	0.018018	0.0412371	0.0123457	0.0232558	1,3,4,5,7
irx1a	0.0347826	0.0540541	0.0727273	0.0115741	0.0941176	0.0288809	0.0843882	0.00900901	0.134021	0.135802	0.255814	2,3,5,7,9,10,11
sum_gene+	1	2	3	4	5	6	7	8	9	10	11	averge gene expression
zic1	1.27273	1.70909	1.30769	1.5	1.5	1.66667	1	1	2.67105	0	0	9
zbtb18	1.11538	1	1	1.33333	3.66667	1	2.2381	1.2	1.25	0	0	5,7
en2b	1.12963	2.06061	1.53886	1.30508	1.49091	2.10714	1	2.10989	2.95455	1.38889	1	2,6,8,9
calb2a	4.53846	3.86792	3.12121	1.77083	2.37143	1.14286	4.25	1	2.2	2.25	6.05714	1,2,3,5,7,9,10,11
synpr	1.54545	1.4	1	1	1.25	3	1	0	0	0	0	6
bhlhe22	1.2	1.28571	1	1	1.44444	1.33333	3.23853	0	0	1	0	7
kctd4	1.57233	3.04592	2.49057	1.67857	1.65517	4.68919	1.41026	1.20833	1.5	1.45455	2	2,3,6,11
pdyn	1.16667	3.5814	0	1	1	1.66667	0	1	0	0	0	2
foxb1a	3.19372	2.58065	4.49485	4.95775	3.40476	2.09091	2.64516	1	3.5	1	1	1,2,3,4,5,6,7,9
irx1a	1.5	2.14706	1.45455	1.2	1.625	1	1.5	1.5	1.84615	2	1.63636	2,10
											zic1	2,9
											zbtb18	5,7
											en2b	1,2,3,4,5,6,8,9,10
											calb2a	1,2,3,4,5,7,8,9,10,11
											synpr	6
											bhlhe22	7,10
											kctd4	1,2,3,4,5,6,7,8,9,10,11
											pdyn	2
											foxb1a	1,2,3,4,5,6,7,9
											irx1a	2,3,5,7,9,10,11
