# Supplementary material for: The landscape of regulatory genes in brain-wide neuronal phenotypes of a vertebrate brain
Source: eLife. 2021 Dec 13;10:e68224. doi: 10.7554/eLife.68224 (PMC8769648; doi:10.7554/eLife.68224)
Supplement: Figure 4—source data 2. [file elife-68224-fig4-data2.xlsx]

## Sheet: others
	Gene name	Bi-stratified	Mono-stratified	Non-stratified	necklace	Ascend	Descend	Cross hemisphere	bipolar
	b5			1						hui	13.546
	20190427_b5_uastdtomato_vglutcre_fish17		1
	20190427_b5_uastdtomato_vglutcre_fish3			1
	20190427_b5_uastdtomato_vglutcre_fish2						1
	20190427_b5_gal4-uas_tdtomato-vglut2a_cre_fish15_hucgcamp		1	1
	20190427_b5_gal4-uas_tdtomato-vglut2a_cre_fish5		1
	190507_bhlhe22-gal4_vglut2a-switch_uas-cre_fish1_live			2
	20190507_bhlhe22gal4_vglut2a-switch_uas-cre_fish3		2
	20190507_bhlhe22gal4_vglut2a-switch_uas-cre_fish4			2
	20190525_b5_vglut2acre_uasstop_fish1			7	4
	190723-8dpf-b5-gal4-vgluta-cre-uas-tdtomato-30s-fish1			2	1
	190723-8dpf-b5-gal4-vgluta-cre-uas-tdtomato-30s-fish2						1
	20190726-8dpf-b5-vglutcre-uastd-fish1		1
	20190726-8dpf-b5-vglutcre-uastd-fish2					1
	20190726-8dpf-b5-vglutcre-uastd-fish3			2	1					hui
	190712-b5-gal4-uas-stop-vhlut2a-cre-30s-fish1				1		1
	190712-b5-gal4-uas-stop-vhlut2a-cre-30s-fish2		1
	sum(colume)	0	7	18	7	1	3	0	0	36
	b5 percentage	0	0.194444	0.5	0.194444	0.0277778	0.0833333	0	0	1
	20190419_pdyn_gal4_vglut2a-cre_uas_stop_fish1						2
	190507_pdyn-gal4-vglut2a-cre-uas-stop-fish3-huc-h2bgcamp			1
	20190516_pdyn_bgal4_vglut2a-cre_uas-tdcaax_fish3				17
	20190516_pdyn_bgal4_vglut2a-cre_uas-tdcaax_fish4
	20190516-pdyngal4_vglut2a-cre_uas-tdcaax_fish1
	20190516-pdyngal4_vglut2a-cre_uas-tdcaax_fish2			1	1
	20190518_pdyn_uasstop-tdtcaax_vglutcre_fish6				4
	20190518_pdyn_uasstop-tdtcaax_vglutcre_fish7_notectum
	20190518_pdyngal4_vglut2a_cre_uas-tdcaax_fish8				12
	20190518_pdyngal4_vglut2a_cre_uas-tdcaax_fish9				12
	20190518_pdyngal4_vglut2a_cre_uas-tdcaax_fish11					1
	190610-6dpf-pdyn-gal4-uas-stop-vglut2a-cre-fish1-60w				4
	190708-8dpf-pdyn-gal4-uas-tdtomato-vglut2a-cre-30s-fish1
	190708-8dpf-pdyn-gal4-uas-tdtomato-vglut2a-cre-30s-fish2
	190708-8dpf-pdyn-gal4-uas-tdtomato-vglut2a-cre-30s-fish3				1
	190710-8dpf-pdyn-gal4-uas-tdtomato-vglut2a-cre-30s-fish1			2	1
	190711-pdyn-gal4-uas-stop-tdtomato-vglut2a-cre-30s-fish1				14
	190711-pdyn-gal4-uas-stop-tdtomato-vglut2a-cre-30s-fish2				3	1
	190711-pdyn-gal4-uas-stop-tdtomato-vglut2a-cre-30s-fish3				3
	190711-pdyn-gal4-uas-stop-tdtomato-vglut2a-cre-30s-fish4				4
	190711-pdyn-gal4-uas-stop-tdtomato-vglut2a-cre-30s-fish5				2
	190711-pdyn-gal4-uas-stop-tdtomato-vglut2a-cre-30s-fish6				3
	190711-pdyn-gal4-uas-stop-tdtomato-vglut2a-cre-30s-fish7				5
	190711-pdyn-gal4-uas-stop-tdtomato-vglut2a-cre-30s-fish8				6
	20190713_pdyn_vglut2acre_uasstop_fish1				1
	20190713_pdyn_vglut2acre_uasstop_fish1				1			0
	20190427_pdyn_uastdtomato_vglutcre_fish2			1		2	2
	190712-pdyn-gal4-uas-stop-vhlut2a-cre-30s-fish1	1
	sum(colume)	1	0	5	94	4	4	0	0	108
	pdyn percentage	0.00925926	0	0.0462963	0.87037	0.037037	0.037037	0	0	1
	20190525_synpr_vglut2acre_uasstop_fish1		2	3				1
	20190525_synpr-gal4-uas-stop-tdcaax-vglut2a-cre-fish1-live
	20190525_synpr-gal4-uas-stop-tdcaax-vglut2a-cre-fish2-live			3	2
	190529-8dpf-synpr-gal4-uas-sto-tdcaax-vglut2a-cre-fish1			3
	190529-8dpf-synpr-gal4-uas-sto-tdcaax-vglut2a-cre-fish2			1
	190724-8dpf-synpr-gal4-uas-tdtomato-vglut2a-cre-30s-fish1			1
	190724-8dpf-synpr-gal4-uas-tdtomato-vglut2a-cre-30s-fish2		2				1
	190724-8dpf-synpr-gal4-uas-tdtomato-vglut2a-cre-30s-fish3			1		1
	190724-8dpf-synpr-gal4-uas-tdtomato-vglut2a-cre-30s-fish4
	190724-8dpf-synpr-gal4-uas-tdtomato-vglut2a-cre-30s-fish5			1
	191219-8dpf-huc-h2bgcamp-vglut2a-cre-synpr-gal4-uas-ldl-tdcaax-60w-fish1	1
	sum(colume)	1	4	13	2	1	1	1	0	23
	synpr percentage	0.0434783	0.173913	0.565217	0.0869565	0.0434783	0.0434783	0.0434783	0	1
	190718-zic1-gal4-uas-stop-tstomatocaax-vglut2a-cre-30s-fish1			1
	190718-zic1-gal4-uas-stop-tstomatocaax-vglut2a-cre-30s-fish2	1
	190718-zic1-gal4-uas-stop-tstomatocaax-vglut2a-cre-30s-fish3			2
	190718-zic1-gal4-uas-stop-tstomatocaax-vglut2a-cre-30s-fish4			1
	190718-zic1-gal4-uas-stop-tstomatocaax-vglut2a-cre-30s-fish5	1
	190718-zic1-gal4-uas-stop-tstomatocaax-vglut2a-cre-30s-fish6	1
	190718-zic1-gal4-uas-stop-tstomatocaax-vglut2a-cre-30s-fish7			2
	190718-zic1-gal4-uas-stop-tstomatocaax-vglut2a-cre-30s-fish8			1
	190723-8dpf-zic1-gal4-vgluta-cre-uas-tdtomato-30s-fish1			3
	190723-8dpf-zic1-gal4-vgluta-cre-uas-tdtomato-30s-fish2		1	3	1
	190723-8dpf-zic1-gal4-vgluta-cre-uas-tdtomato-30s-fish3	2		2
	190723-8dpf-zic1-gal4-vgluta-cre-uas-tdtomato-30s-fish4				1
	190723-8dpf-zic1-gal4-vgluta-cre-uas-tdtomato-30s-fish5			1
	191225-8dpf-huc-h2bgcamp-zic1-gal4-uas-loxp-dsred-vglut2a-cre-60s-fish1			4					1
	191225-8dpf-huc-h2bgcamp-zic1-gal4-uas-loxp-dsred-vglut2a-cre-60s-fish2	2				1
	191225-8dpf-huc-h2bgcamp-zic1-gal4-uas-loxp-dsred-vglut2a-cre-60s-fish5						1
	sum(colume)	7	1	20	2	1	1	0	1	33
	zic1 percentage	0.212121	0.030303	0.606061	0.0606061	0.030303	0.030303	0	0.030303	1
	190719_vglutcre_uasstop_huch2bgcamp_pcp4a_fish1			2
	190719_vglutcre_uasstop_huch2bgcamp_pcp4a_fish2			1
	190719_vglutcre_uasstop_huch2bgcamp_pcp4a_fish3			1
	190719_vglutcre_uasstop_huch2bgcamp_pcp4a_fish4			1
	190719_vglutcre_uasstop_huch2bgcamp_pcp4a_fish5			3
	20190726-8dpf-pdyn-vglutcre-uastd-fish1			1
	20190726-8dpf-pcp4a-vglutcre-uastd-fish1			1
	20190726-8dpf-pcp4a-vglutcre-uastd-fish2			1		1
	20190726-8dpf-pcp4a-vglutcre-uastd-fish3
	20190726-8dpf-pcp4a-vglutcre-uastd-fish4			2
	20190726-8dpf-pcp4a-vglutcre-uastd-fish5			1	1
	sum(colume)	0	0	14	1	1	0	0	0	16
	pcp4a percentage	0	0	0.875	0.0625	0.0625	0	0	0	1
	20190727_8dpf_en2b_vglutcre_uastd_20w_fish5
	20190727_8dpf_en2b_vglutcre_uastd_20w_fish6			2
	20190727_8dpf_en2b_vglutcre_uastd_20w_fish7			3
	20190727_8dpf_en2b_vglutcre_uastd_20w_fish8			1
	20190727_8dpf_en2b_vglutcre_uastd_20w_fish9			2
	20190727_en2b-gal4_uas-tdtomato_vglut2a-cre_20w-fish1			6
	20190727_en2b-gal4_uas-tdtomato_vglut2a-cre_20w-fish2			7
	20190727_en2b-gal4_uas-tdtomato_vglut2a-cre_20w-fish3			1			1
	20190727_en2b-gal4_uas-tdtomato_vglut2a-cre_20w-fish4			3
	20190727_en2b-gal4_uas-tdtomato_vglut2a-cre_20w-fish5			1
	20190727_en2b-gal4_uas-tdtomato_vglut2a-cre_20w-fish10			4	1
	20190727_en2b-gal4_uas-tdtomato_vglut2a-cre_20w-fish11			4	2
	20190727_en2b-gal4_uas-tdtomato_vglut2a-cre_20w-fish12			1	1
	20190727_en2b-gal4_uas-tdtomato_vglut2a-cre_20w-fish13			4			1
	20190727_en2b-gal4_uas-tdtomato_vglut2a-cre_20w-fish14	1
	191219-8dpf-huc-h2bgcamp-vglut2a-cre-en2b-gal4-uas-ldl-tdcaax-60w-fish1		1
	191219-8dpf-huc-h2bgcamp-vglut2a-cre-en2b-gal4-uas-ldl-tdcaax-60w-fish2						2
	sum(colume)	1	1	39	4	0	4	0	0	49
	en2b percentage	0.0204082	0.0204082	0.795918	0.0816327	0	0.0816327	0	0	1
eg.	prdx	1								hui
	QXY_20190413-tubb5-gal4FF-vglut2a-cre_uas-stop-fish3			3	1			1		QXY
	190724-8dpf-neurod1-gal4-uas-tdtomato-vglut2a-cre-30s-fish1				1
	20190525_gbx2gal4-vglut2a-switch-fish1				1
	20190525_qkia_gal4-uas_stop-tdcaax-vglut2a-cre_fish1-live			2	5
	qkia				1					QXY
	qkia									hui
	20190507_calb2a_gal4_uas_stop-vglut2a-cre_fish2-h2a-gfp
	20190525_calb2a-gal4-uas-stop-tdcaax-vglut2a-cre-fish1	1	1		1
	20190525_calb2a-gal4-uas-stop-tdcaax-vglut2a-cre-fish2-live	2		3
	calb2a			1					1		9.243
	191212_huc-h2bgcamp-calb2a-gal4-uastdcaax-vglut2a-cre-60w-fish1
	191212_huc-h2bgcamp-calb2a-gal4-uastdcaax-vglut2a-cre-60w-fish2			1
	191212_huc-h2bgcamp-calb2a-gal4-uastdcaax-vglut2a-cre-60w-fish3						1
	191212_huc-h2bgcamp-calb2a-gal4-uastdcaax-vglut2a-cre-60w-fish3			1
	20191221_331FVH_fish02_ZH_HuCH2BG6s_vglucre_uasstop_calb2agla4_Cycle	1		2
	20191221_331FVH_fish03_ZH_HuCH2BG6s_vglucre_uasstop_calb2agla4_Cycle			5
	20191221_331FVH_fish03_ZH_HuCH2BG6s_vglucre_uasstop_calb2agla4_Cycle_01						1
	20191221_331FVH_fish04_ZH_HuCH2BG6s_vglucre_uasstop_calb2agla4_Cycle_01								1
	20191221_331FVL_fish02_ZH_HuCH2BG6s_uasstop_vglutcre_calb2agal4_Cycle		2	2
	20191221_331FVL_fish02_ZH_HuCH2BG6s_uasstop_vglutcre_calb2agal4_Cycle_01						1
	sum(colume)	4	3	15	1	0	3	0	2	28
	calb2a percentage	0.142857	0.107143	0.535714	0.0357143	0	0.107143	0	0.0714286	1
	191217-huc-h2bgcamp_vglut2a-kctd4-ga4-uas-lsl-tdcaax-60w-fish1			2	1
	191225-8dpf-huc-h2bgcamp-kctd4-gal4-uas-loxp-dsred-vglut2a-cre-60s-fish1					1
	191225-8dpf-huc-h2bgcamp-kctd4-gal4-uas-loxp-dsred-vglut2a-cre-60s-fish2			2	5
	191225-8dpf-huc-h2bgcamp-kctd4-gal4-uas-loxp-dsred-vglut2a-cre-60s-fish3			3	4
	191225-8dpf-huc-h2bgcamp-kctd4-gal4-uas-loxp-dsred-vglut2a-cre-60s-fish4				5
	191225-8dpf-huc-h2bgcamp-kctd4-gal4-uas-loxp-dsred-vglut2a-cre-60s-fish5						1
	sum	0	0	7	15	1	1	0	0	24
	20191214_331FVL_fish01_ZH_HuCH2BG6s_vglut_tdtomato_pou2f2a_Cycle				6
	20191122_331FVL_fish03_ZH_HuCH2BG6s_vglut_tdtomato_pou2f2a			1	1
	20191214_331FVH_fish02_HuCH2BG6s_vglut2a_tdcaax_pou2f2a					1
	sum	0	0	1	7	1	0	0	0	9

## Sheet: irx1a
Gene name	Bi-stratified	Mono-stratified	Non-stratified	necklace	Ascend	Descend	Cross hemisphere	bipolar
20190413_irx1a-gal4FF_uaskaede_fish2			1						20190413_irx1a-gal4FF_uaskaede_fish2_path10	hui
20190324_irx1a_vglut2a_cre_uas_switch_fish1_Cycle			2							hui	12.849
20190324_irx1a_vglut2a_cre_uas_switch_fish5_Cycle							1			hui	5.654
20190324_irx1a_vglut2a_cre_uas_switch_fish6	1									hui	47.914
20190324_irx1a_vglut2a_cre_uas_switch_fish11		1								hui	32.797
20190324_irx1a_vglut2a_cre_uas_switch_fish8			1		1					hui	almost 0
20190325_irx1a_vglutcre_uasswitch_fish14			1							hui	9.087
20190325_irx1a_vglutcre_uasswitch_fish16		1	1							hui	4.422
20190412_irx1a_gal4FF_uas-stop_vglut2a-cre_fish8	1		1		1					hui	2.331
20190412_irx1a-gal4FF_uas-stop_vglut2a-cre_fish2			1			1				hui	13.066
20190412_irx1a-gal4FF_uas-stop_vglut2a-cre_fish6	1		1			1				hui	31.838
20190412_irx1a-gal4FF_uas-stop_vglut2a-cre_fish10		1	3		1	2				hui	9.952
QXY_20190413_irx1a_gal4FF_uaskaede_fish3			2			1		balloons		qxy
QXY_20190419_irx1a_gal4_vglut2a-cre_uas_stop_fish1			4			1				qxy
20190427_irx1a_uastdtomato_vglutcre_fish8			2							hui	14.501
20190427_irx1a_gal4-uas_tdtomato-vglut2a_cre_fish9_shhgp_hucgcamp			1			1				hui	5.093
20190427_irx1a_gal4-uas_tdtomato-vglut2a_cre_fish2_shhgfp			1							hui	11.586
20190427_irx1a_uastdtomato_vglutcre_fish17_SHH						1				hui
20190427_irx1a_uastdtomato_vglutcre_fish16_SHH			1			2
20190427_irx1a_uastdtomato_vglutcre_fish13_SHH
20190427_irx1a_uastdtomato_vglutcre_fish12			1
20190427_irx1a_uastdtomato_vglutcre_fish3			2
20190427_irx1a_hucXshh_uastdtomato_vglutcre_fish7		1
20190427_irx1a_hucXshh_uastdtomato_vglutcre_fish4
20190427_irx1a_gal4-uas_tdtomato-vglut2a_cre_fish19_shhgfp
20190427_irx1a_gal4-uas_tdtomato-vglut2a_cre_fish14			4
20190427_irx1a_gal4-uas_tdtomato-vglut2a_cre_fish9_shhgp_hucgcamp			2
20190427_irx1a_gal4-uas_tdtomato-vglut2a_cre_fish6		1	1
20190427_irx1a_gal4-uas_tdtomato-vglut2a_cre_fish5						non-descend 1
20190427_irx1a_gal4-uas_tdtomato-vglut2a_cre_fish2_shhgfp
20190427_irx1a_gal4-uas_tdtomato-vglut2a_cre_fish1		1	1
20190516_irx1a_bgal4_vglut2a-cre_uas-tdcaax_fish2			1
20190516_irx1a_bgal4_vglut2a-cre_uas-tdcaax_fish3_shh	1		1
20190516-irx1abgal4_vglut2a-cre_uas-tdcaax_fish2001			1
20190518_irx1a_uasstop-tdtcaax_vglutcre_fish1			5	3
20190518_irx1a_uasstop-tdtcaax_vglutcre_fish2				1		2
20190518_irx1a_uasstop-tdtcaax_vglutcre_fish3			3
20190518_irx1a_uasstop-tdtcaax_vglutcre_fish4-telX1
20190518_irx1a_uasstop-tdtcaax_vglutcre_fish5					1
20190518_irx1agal4_vglut2a_cre_uas-tdcaax_fish1_shh	1
20190518_irx1agal4_vglut2a_cre_uas-tdcaax_fish2_shh		1
20190518_irx1agal4_vglut2a_cre_uas-tdcaax_fish3_shh			1
20190518_irx1agal4_vglut2a_cre_uas-tdcaax_fish4			1		1
20190518_irx1agal4_vglut2a_cre_uas-tdcaax_fish5		1	2	1
20190518_irx1agal4_vglut2a_cre_uas-tdcaax_fish6		1	4
20190525_irx1a_gal4-uas_stop-tdcaax-vglut2a-cre_fish1-live-shhgfp
20190525_irx1a_gal4-uas_stop-tdcaax-vglut2a-cre_fish2-live			3	2
20190525_irx1a_vglut2acre_uasstop_h2agcampXshhgfp_fish3
190527-6dpf-irx1a-gal4-uas-gcamp-fish1-60w			3
190527-6dpf-irx1a-gal4-uas-gcamp-fish3-60w			1
190610-6dpf-irx1a-gal4-uas-stop-vglut2a-cre-fish1-60w				2
190710-8dpf-irx1a-gal4-uas-tdtomato-vglut2a-cre-30s-fish1		1	2
190710-8dpf-irx1a-gal4-uas-tdtomato-vglut2a-cre-30s-fish2			6
190723-8dpf-irx1a-gal4-vgluta-cre-uas-tdtomato-30s-fish1			1
190723-8dpf-irx1a-gal4-vgluta-cre-uas-tdtomato-30s-fish2						2
190723-8dpf-irx1a-gal4-vgluta-cre-uas-tdtomato-30s-fish3	1	1
20190713_irx1a_vglut2acre_uasstop_fish4_necklace			2	1		2
20190713_irx1a_vglut2acre_uasstop_fish19				1
20190714_irx1a_vglut2acre_uasstoptdcaax_fish1		1	5
20190714_irx1a_vglut2acre_uasstoptdcaax_fish2						1
20190714_irx1a_vglut2acre_uasstoptdcaax_fish3
20190714_irx1a_vglut2acre_uasstoptdcaax_fish4		2	5	1
20190728_irx1a-gal4_uas-tdtomato_vglut2a-cre_20w-fish5			1	1
20190728_irx1a-gal4_uas-tdtomato_vglut2a-cre_20w-fish6			4
20190728_irx1a-gal4_uas-tdtomato_vglut2a-cre_20w-fish7			3
20190728_irx1a-gal4_uas-tdtomato_vglut2a-cre_20w-fish8		1		2
20190728_irx1a-gal4_uas-tdtomato_vglut2a-cre_20w-fish9			2
20190728-8dpf-irx1a-gal4_vglut2a-cre_uas-tdtomato_20w-fish1			3
20190728-8dpf-irx1a-gal4_vglut2a-cre_uas-tdtomato_20w-fish2	1
20190728-8dpf-irx1a-gal4_vglut2a-cre_uas-tdtomato_20w-fish3		1	1
20190728-8dpf-irx1a-gal4_vglut2a-cre_uas-tdtomato_20w-fish4		2
20190728-8dpf-irx1a-gal4_vglut2a-cre_uas-tdtomato_20w-fish10		3		1
20190728-8dpf-irx1a-gal4_vglut2a-cre_uas-tdtomato_20w-fish11			1	2
20190726-8dpf-irx1a-vglutcre-uastd-fish1		1
20190726-8dpf-irx1a-vglutcre-uastd-fish2	2		2		1
20190726-8dpf-irx1a-vglutcre-uastd-fish3			2	2				1
20190726-8dpf-irx1a-vglutcre-uastd-fish4			1
20190726-8dpf-irx1a-vglutcre-uastd-fish5		1	3
20190726-8dpf-irx1a-vglutcre-uastd-fish6			4	1
20190726-8dpf-irx1a-vglutcre-uastd-fish7			4	1
20190726-8dpf-irx1a-vglutcre-uastd-fish8			3
20190726-8dpf-irx1a-vglutcre-uastd-fish9			3	1
20190726-8dpf-irx1a-vglutcre-uastd-fish10					1
20190726-8dpf-irx1a-vglutcre-uastd-fish11					1
190725_8dpf_irx1a_vglutcre_uasstop_30s_fish1			1
190725_8dpf_irx1a_vglutcre_uasstop_30s_fish2
190725_8dpf_irx1a_vglutcre_uasstop_30s_fish3			2
190725_8dpf_irx1a_vglutcre_uasstop_30s_fish4			2
190725_8dpf_irx1a_vglutcre_uasstop_30s_fish5		1	1
190725_8dpf_irx1a_vglutcre_uasstop_30s_fish6			1
190725_8dpf_irx1a_vglutcre_uasstop_30s_fish7			1
190725_8dpf_irx1a_vglutcre_uasstop_30s_fish8			3
190725_8dpf_irx1a_vglutcre_uasstop_30s_fish9			1
190725_8dpf_irx1a_vglutcre_uasstop_30s_fish10		1	1	1
190725_8dpf_irx1a_vglutcre_uasstop_30s_fish11		1
190725_8dpf_irx1a_vglutcre_uasstop_30s_fish12			1
190725_8dpf_irx1a_vglutcre_uasstop_30s_fish13		4
190712-irx1a-gal4-uas-stop-vhlut2a-cre-30s-fish1				2	2 necklace
190712-irx1a-gal4-uas-stop-vhlut2a-cre-30s-fish2		1
190712-irx1a-gal4-uas-stop-vhlut2a-cre-30s-fish3		2	1
190712-irx1a-gal4-uas-stop-vhlut2a-cre-30s-fish4			2	2
190712-irx1a-gal4-uas-stop-vhlut2a-cre-30s-fish5				1
190712-irx1a-gal4-uas-stop-vhlut2a-cre-30s-fish6			1
190717-irx1a-gal4-uas-stop-tstomatocaax-vglut2a-cre-30s-fish1	1			2
190717-irx1a-gal4-uas-stop-tstomatocaax-vglut2a-cre-30s-fish2			1
190717-irx1a-gal4-uas-stop-tstomatocaax-vglut2a-cre-30s-fish3	1
190717-irx1a-gal4-uas-stop-tstomatocaax-vglut2a-cre-30s-fish4				1
20190713_irx1a-gal4_uas-tdtomatocaax_vglut2a-cre-20w-fish1			1
20190713_irx1a-gal4_uas-tdtomatocaax_vglut2a-cre-20w-fish5			1
20190713_irx1a-gal4_uas-tdtomatocaax_vglut2a-cre-20w-fish7_necklace			2	5		1
20190713_irx1a-gal4_uas-tdtomatocaax_vglut2a-cre-20w-fish8			4
20190713_irx1a-gal4_uas-tdtomatocaax_vglut2a-cre-20w-fish10		1						1 mono
20190713_irx1a-gal4_uas-tdtomatocaax_vglut2a-cre-20w-fish11_necklace	1		3
20190713_irx1a-gal4_uas-tdtomatocaax_vglut2a-cre-20w-fish12						1
20190713_irx1a-gal4_uas-tdtomatocaax_vglut2a-cre-20w-fish13				3
20190713_irx1a-gal4_uas-tdtomatocaax_vglut2a-cre-20w-fish14_necklace		1	2	3
20190713_irx1a-gal4_uas-tdtomatocaax_vglut2a-cre-20w-fish15		1
20190713_irx1a-gal4_uas-tdtomatocaax_vglut2a-cre-20w-fish16				2	1 necklace
20190713_irx1a-gal4_uas-tdtomatocaax_vglut2a-cre-20w-fish17							1
sum(colume)	12	36	150	45	8	19	2	1	273
irx1a percentage	0.043956	0.131868	0.549451	0.164835	0.029304	0.0695971	0.00732601	0.003663	1

## Sheet: foxb1a
Gene name	Bi-stratified	Mono-stratified	Non-stratified	Necklace	Ascend	Descend	Cross hemisphere	bipolar
20190413-foxb1a-gal4FF-vglut2a-cre_uas-stop-fish1			1			1			hui
20190419_foxb1a_gal4_vglut2a-cre_uas_stop_fish1			2						hui
20190412_foxb1a_gal4FF_uas-stop_vglut2a-cre_fish5						3			hui	7.541
20190412_foxb1a_gal4FF_uas-stop_vglut2a-cre_fish9			1						hui	3.34
20190412_foxb1a-gal4FF_uas-stop_vglut2a-cre_fish7	1								hui	13.066
20190412_foxb1a-gal4FF_uas-stop_vglut2a-cre_fish13			1							17.421
QXY_20190413-foxb1a-gal4FF-vglut2a-cre_uas-stop-fish2									qxy	almost 0
20190419_foxb1a_gal4_vglut2a-cre_uas_stop_fish1			2						hui	6.226
20190427_foxb1a_uastdtomato_vglutcre_fish1		1	1						hui	3.662
20190427_foxb1a_gal4-uas_tdtomato-vglut2a_cre_fish3_hucgcamp			2						hui	7.463
20190427_foxb1a_uastdtomato_vglutcre_fish2
20190427_foxb1a_uastdtomato_vglutcre_fish1			2
20190427_foxb1a_gal4-uas_tdtomato-vglut2a_cre_fish5							2
20190427_foxb1a_gal4-uas_tdtomato-vglut2a_cre_fish4_hucgcamp
20190427_foxb1a_gal4-uas_tdtomato-vglut2a_cre_fish3_hucgcamp			3
20190507_foxb1a-gal4_vglut2a-cre_uas-stop_fish3_huc-h2bgcamp
20190507_foxb1a-gal4_vglut2a-cre_uas-stop_fish4_huc-h2bgcamp		2	2		1
20190507vglut2acre_uasstop_hucgcamp_foxb1a_fish1_live			2
20190507vglut2acre_uasstop_hucgcamp_foxb1a_fish2_live
20190507vglut2acre_uasstop_hucgcamp_foxb1a_fish5_live
20190507vglut2acre_uasstop_hucgcamp_foxb1a_fish6_live			1
20190516_foxb1a_bgal4_vglut2a-cre_uas-tdcaax_fish2002			3				1
20190713_foxb1a_vglut2acre_uasstop_fish2			1
20190727_8dpf_foxb1a_vglutcre_uastd_20w_fish1			1				3	4
20190727_8dpf_foxb1a_vglutcre_uastd_20w_fish2
20190727_8dpf_foxb1a_vglutcre_uastd_20w_fish3		1		1
20190727_8dpf_foxb1a_vglutcre_uastd_20w_fish4
20190727_8dpf_foxb1a_vglutcre_uastd_20w_fish5
sum(colume)	1	4	25	1	1	4	6	4	46
foxb1a percentage	0.0217391	0.0869565	0.543478	0.0217391	0.0217391	0.0869565	0.130435	0.0869565	1

## Sheet: zbtb18
Gene name	Bi-stratified	Mono-stratified	Non-stratified	necklace	Ascend	Descend	Cross hemisphere	bipolar		hui
20190413_zbtb18-gal4FF-vglut2a-cre_uas-stop-fish2	1		2		1					hui
										hui
20190413_zbtb18-gal4FF-vglut2a-cre_uas-stop-fish8	2	2				1				hui
20190413_zbtb18-gal4FF-vglut2a-cre_uas-stop-fish4		1			1			1		hui
20190413-zbtb18-gal4FF-vglut2a-cre_uas-stop-fish4	1	3			1					hui
20190413-zbtb18-gal4FF-vglut2a-cre_uas-stop-fish11								1		hui
		1								hui
20190327_zbtb18_vglut2a_cre_uas_switch_fish11		1	1							hui	26.853
20190327_zbtb18_vglut2a_cre_uas_switch_fish12			1							hui	10.804
20190412_zbtb18_gal4FF_uas-stop_vglut2a-re_fish1			1			1				hui	4.671
20190412_zbtb18_gal4FF_uas-stop_vglut2a-re_fish12			1							hui	26.312
20190412_zbtb18-gal4FF_uas-stop_vglut2a-cre_fish4	1		2							hui	9.757
20190412_zbtb18-gal4FF_uas-stop_vglut2a-cre_fish10	1									hui	27.957
20190413_zbtb18-gal4FF-vglut2a-cre_uas-stop-fish12	1		2				1			hui	39.561
04.13fish2						1				sxy
04.13fish7		1	1							sxy
04.13fish12			1							sxy
04.13fish(ztbfish1)			2							sxy
04.13fish(ztbfish8)							1			sxy
04.13fish5	1	1								sxy
QXY_20190413_zbtb18_gal4FF_vglut2a_cre_uas_stop_fish1			1	3						qxy
QXY_20190413_zbtb18_gal4FF_vglut2a_cre_uas_stop_fish13		1	3							qxy
QXY_20190413-zbtb18-gal4FF-vglut2a-cre_uas-stop-fish6	1		3				2			qxy
QXY_20190419_zbtb18_gal4-vglut2a_cre-uas_stop_fish2	1	1				1				qxy
20190507vglut2acre_uasstop_zbtb18_fish5_live		1								hui	12.186
20190427_zbtb18_uastdtomato_vglutcre_fish3			1			1	1			hui	5.116
20190427_zbtb18_gal4-uas_tdtomato-vglut2a_cre_fish1			1
190507_zbtb18gal4-vglut2a-cre-uas-stop-fish2-huc-h2bgcamp		2	2
190507_zbtb18gal4-vglut2a-cre-uas-stop-fish8		1	1
190507_zbtb18gal4-vglut2a-cre-uas-stop-fish9			1
190507_zbtb18gal4-vglut2a-cre-uas-stop-fish10-huc-h2bgcamp			2
190507_zbtb18gal4-vglut2a-cre-uas-stop-fish11
20190507vglut2acre_uasstop_zbtb18_fish3_live			1
20190507vglut2acre_uasstop_zbtb18_fish4_live			3	1
20190507vglut2acre_uasstop_zbtb18_fish5_live			4		1
20190507vglut2acre_uasstop_zbtb18_fish6_live
20190507vglut2acre_uasstop_zbtb18_fish7_live						3	1
20190507vglut2acre_uasstop_zbtb18_fish12_live			4		1		1
20190518_zbtb18agal4_vglut2a_cre_uas-tdcaax_fish1-huch2bgcamp			1	2
20190518_zbtb18agal4_vglut2a_cre_uas-tdcaax_fish2				1
190722_zbtb18_8dpf_vglutcre_uasstdtomato_fish1	1		3
20190727_8dpf_zbtb18_vglutcre_uastd_20w_fish1			1					1
20190727_8dpf_zbtb18_vglutcre_uastd_20w_fish2			1
20190728_zbtb18-gal4_uas-tdtomato_vglut2a-cre_20w-fish1				1
20190727_zbtb18-gal4_uas-tdtomato_vglut2a-cre_20w-fish5				1
20190727_zbtb18-gal4_uas-tdtomato_vglut2a-cre_20w-fish6				1
20190727_zbtb18-gal4_uas-tdtomato_vglut2a-cre_20w-fish7			2	1
190722_zbtb18_8dpf_vglutcre_uasstdtomato_fish1			3
190717-zbtb18-gal4-uas-stop-tstomatocaax-vglut2a-cre-30s-fish1						1
190717-zbtb18-gal4-uas-stop-tstomatocaax-vglut2a-cre-30s-fish2			3
190717-zbtb18-gal4-uas-stop-tstomatocaax-vglut2a-cre-30s-fish3	2
190717-zbtb18-gal4-uas-stop-tstomatocaax-vglut2a-cre-30s-fish4			1
190717-zbtb18-gal4-uas-stop-tstomatocaax-vglut2a-cre-30s-fish5		3		3
190717-zbtb18-gal4-uas-stop-tstomatocaax-vglut2a-cre-30s-fish6	1
190717-zbtb18-gal4-uas-stop-tstomatocaax-vglut2a-cre-30s-fish7			1
190717-zbtb18-gal4-uas-stop-tstomatocaax-vglut2a-cre-30s-fish8			1
190717-zbtb18-gal4-uas-stop-tstomatocaax-vglut2a-cre-30s-fish9			1
190717-zbtb18-gal4-uas-stop-tstomatocaax-vglut2a-cre-30s-fish10	1
190717-zbtb18-gal4-uas-stop-tstomatocaax-vglut2a-cre-30s-fish11			2
190717-zbtb18-gal4-uas-stop-tstomatocaax-vglut2a-cre-30s-fish12		1
190717-zbtb18-gal4-uas-stop-tstomatocaax-vglut2a-cre-30s-fish13			1
20190713_zbtb18_vglut2acre_uasstop_fish1					2
20190713_zbtb18_vglut2acre_uasstop_fish2		1
20190713_zbtb18_vglut2acre_uasstop_fish3		1	2	1
20190713_zbtb18_vglut2acre_uasstop_fish4			2	2
20190713_zbtb18_vglut2acre_uasstop_fish5
sum(colume)	15	22	66	17	7	9	7	3	146
zbtb18 percentage	0.10274	0.150685	0.452055	0.116438	0.0479452	0.0616438	0.0479452	0.0205479	1

## Sheet: analysis_190724
Gene name	Bi-stratified	Mono-stratified	Non-stratified	necklace	bipolar	Ascend	Descend	Cross hemisphere	n(cells)	N(fish)	repeat number	clusters
kctd4	0	0	7	15	0	1	1	0	24	6
calb2a	4	3	15	1	2	0	3	0	28	14	2	5 and 10
zic1	7	1	20	2	1	1	1	0	33	16	4	6,8,11,13
bhlhe22	0	7	18	7	0	1	3	0	36	16	1	9
foxb1a	1	4	25	1	4	1	4	6	46	29	2	2,10
en2b	1	1	39	4	0	0	4	0	49	17	3	1,4,7
pdyn	1	0	5	94	0	4	4	0	108	28
zbtb18	15	22	66	17	3	7	9	7	146	66	2	8,9
irx1a	12	36	150	45	1	8	19	2	273	119	1	8
sum	41	74	345	186	11	23	48	15	743	311
																											0.00574713	0.0229885	0.54023	0.0977011
Gene name	Non-stratified	Bi-stratified	Mono-stratified	necklace	bipolar	Ascend	Descend	Cross hemisphere																			0.0434783	0	0.173913	0.304348
calb2a	1	1	0	0	0	0	0	0																			0.444444	0	0	0.333333
en2b	1	0	0	1	0	0	1	0																			0.0952381	0.047619	0.0952381	0.214286
irx1a	1	1	1	1	0	1	1	0
kctd4	1	0	0	1	0	0	0	0
zic1	1	1	0	0	0	0	0	0
bhlhe22	1	0	1	1	0	0	0	0
foxb1a	1	0	1	0	1	0	1	1
zbtb18	1	1	1	1	0	1	1	1
pdyn	1	0	0	1	0	1	1	0
