# Supplementary material for: The landscape of regulatory genes in brain-wide neuronal phenotypes of a vertebrate brain
Source: eLife. 2021 Dec 13;10:e68224. doi: 10.7554/eLife.68224 (PMC8769648; doi:10.7554/eLife.68224)
Supplement: Figure 5—source data 1. [file elife-68224-fig5-data1.xlsx]

## Sheet: pattern-differential-RBPs
matched						convergent																	divergent
9-61			matched_RBPs (n = 14)			1-31		5-6		16-36	2-12		3-11		13-24		17-27			convergent_RBPs (n = 58)			7-38		23-25		27-54		20-41		13-15		2-3		60-62		12-16		17-24		11-30			divergent_RBPs (n = 103)
arnt2	3.73471e-36		arnt2			elavl4	2.12899e-84	cirbpb	0	0	rpp25b	8.98386e-10	elavl3	2.1927e-92	cirbpa	1.26478e-16	trmt9b	6.98312e-07		elavl4			qkia	8.91863e-32	rbfox1	1.4797e-46	rbfox1	1.01088e-23	qkia	1.36507e-108	hnrnpabb	8.52235e-34	elavl4	4.82606e-64	elavl4	2.22674e-10	elavl4	3.69599e-68	elavl4	4.53996e-19	rbfox1	3.7118e-49		qkia
celf1	9.44407e-32		celf1			msi2b	7.14336e-12	cirbpa	4.72614e-104		hnrnpa0a	1.71582e-08	elavl4	8.78173e-92	rbfox1	5.55681e-16	qkia	1.19637e-05		msi2b			khdrbs1a	1.72879e-24	raver2	2.68159e-44	rbfox3a	2.59937e-14	elavl4	3.26367e-30	cirbpb	7.20125e-30	lef1	7.61656e-57	pabpc1b	8.77569e-10	rbfox1	2.455e-39			khdrbs1a	2.56768e-18		khdrbs1a
dicer1	1.56655e-30		dicer1			stau1	6.94871e-08	elavl3	1.87232e-103		qkia	6.62963e-06	msi2b	9.55194e-31	elavl4	6.63631e-16	msi2a	0.000426218		stau1			raver2	1.25449e-18	celf2	1.04792e-41	elavl4	1.53281e-06	eif5a2	1.5608e-09	khdrbs1a	5.93696e-26	rbfox1	5.46652e-54	msi2b	0.000249897	msi2b	2.73264e-33			lef1	5.4677e-15		raver2
zfr	1.63935e-29		zfr			eif3k	1.48793e-07	khdrbs1a	2.64295e-101				cirbpb	7.07554e-20	rbfox3a	7.26399e-14				eif3k			eif1b	4.32894e-16	khdrbs1b	1.18621e-08	celf4	1.23577e-05	mbnl3	9.49496e-09	eif4a1a	2.28647e-17	cirbpb	1.13163e-36	raver2	0.000666924	hnrnpabb	1.09375e-16			cirbpb	1.35474e-12		eif1b
nova1	3.376e-28		nova1			khdrbs2	8.29066e-07	hnrnpabb	6.84715e-69				chd4a	7.65337e-20	hnrnpabb	6.25175e-10				khdrbs2			hnrnpabb	6.7433e-16	mbnl2	1.09841e-06	eif4a2	7.17422e-05	pcbp4	1.64205e-05	hnrnpa0a	1.85528e-12	chd4a	3.20639e-12	rbm14b	0.00153484	eif5a2	2.17202e-14			rbfox3a	3.48823e-10		hnrnpabb
pum1	2.61925e-26		pum1					nova2	2.38323e-64				qkia	1.21257e-17	pabpc1b	4.41629e-09				cirbpb			hnrnpa0a	1.7494e-14	rbfox3a	3.58853e-06	eif5	0.00020042	eif3g	0.000208085	eif3ba	1.30257e-10			mbnl3	0.00732306	rbm4.3	3.12245e-13			nova2	1.00936e-09		hnrnpa0a
taf3	2.61037e-23		taf3					eif3m	1.03328e-63				khdrbs2	7.16916e-14	hnrnpa0a	2.99174e-06				cirbpa			cirbpa	2.12838e-14	eif5	0.000197518	eif3g	0.000530184			chd4a	8.80194e-10			cirbpb	0.0106086	lsm4	7.23908e-12			rbm4.3	4.48003e-08		cirbpa
qkia	6.85402e-15		qkia					chd4a	8.96312e-63				polr2d	6.50755e-12	snrpd3l	6.15618e-05				elavl3			eif4a1a	9.46577e-14	trim13	0.00125119	pabpc1b	0.0020813			snrpf	1.71773e-09			taf7	0.0114507	cnbpb	5.3196e-11			mex3b	4.42775e-05		eif4a1a
elavl4	8.11542e-15		elavl4					hnrnpr	3.30333e-61				csdc2a	1.10318e-11	chd4a	0.0170348				khdrbs1a			rbm4.3	4.42755e-11	srebf2	0.00189421	lsm4	0.00612898			eif3f	2.26783e-08			hnrnpabb	0.0156474	hnrnpa0a	5.6062e-10			hnrnpa1b	7.54374e-05		rbm4.3
stau2	6.89943e-12		stau2					rbm4.3	1.26177e-59				eif3m	4.77089e-11						hnrnpabb			hnrnpub	7.54761e-10	upf3a	0.0084971	taf7	0.00916052			snrpe	2.86864e-08			eif4a1a	0.0183751	nova2	2.15672e-09			trim13	0.000111248		hnrnpub
pabpc1b	1.32785e-05		pabpc1b					hnrnpa0a	8.27917e-58				lef1	2.51935e-10						nova2			snrpc	2.21007e-08			papolg	0.0113526			hnrnpr	4.31293e-08			hnrnpa1a	0.0531046	upf3a	6.28591e-08			hnrnpl	0.000337778		snrpc
zranb2	0.000145488		zranb2					syncrip	1.87922e-55				eif2s3	3.14502e-08						eif3m			larp6a	2.29871e-08			sart3	0.012892			sf3b5	5.30399e-08			eif3m	0.0681274	csdc2a	1.84989e-06			hnrnpa0a	0.000470434		larp6a
lef1	0.0187651		lef1					eif2s3	3.56228e-42				syncrip	1.03329e-07						chd4a			syncrip	2.80062e-08			isg20	0.0177718			snrpg	1.22676e-07			nop56	0.0686567	celf4	0.0291824			ewsr1a	0.000789915		syncrip
taf7	0.0277065		taf7					snrpf	2.22245e-41				snrpf	1.0574e-07						hnrnpr			lsm6	5.13013e-08			lsm3	0.0235435			eif2s3	1.5559e-07			ewsr1a	0.0706372					igf2bp3	0.000790621		lsm6
								lef1	3.13109e-41				hnrnpr	2.36858e-07						rbm4.3			stau1	4.88765e-07			raly	0.0417953			eif5a	4.10359e-07			snrpb	0.0745022					snrpg	0.000861955		stau1
								snrpd3l	1.58622e-34				sf3b5	2.22796e-06						hnrnpa0a			rbfox1	4.21615e-06			snrnp70	0.0450492			eif3m	6.44667e-07			isg20	0.0807072					stau2	0.001168		rbfox1
								khdrbs1b	2.90703e-34				nop53	5.92384e-05						syncrip			lsm8	5.12601e-06			eif3s6ip	0.0622001			hnrnpl	1.21053e-06			hnrpkl	0.0845202					hnrnpl2	0.00280421		lsm8
								snrpd1	1.30362e-33											eif2s3			snrpg	1.52705e-05			slu7	0.0649865			snrpd3l	1.39985e-06			upf3a	0.0874158								snrpg
								nsun2	1.06516e-30											snrpf			eif2s2	1.56093e-05			rbm28	0.0749728			elavl4	1.40358e-06			snrpa1	0.087859								eif2s2
								hnrnph1l	2.56264e-30											lef1			eif4e1c	1.96054e-05							snrpd1	1.55296e-06			trmt112	0.107817								eif4e1c
								mex3b	6.65438e-29											snrpd3l			magoh	3.41912e-05							eif4e1c	2.197e-06			celf3a	0.108205								magoh
								snrpe	1.20452e-27											khdrbs1b			cirbpb	3.80474e-05							celf3a	2.33793e-06			sfpq	0.110055								cirbpb
								eif3ha	1.19462e-26											snrpd1			larp4ab	3.84614e-05							eif2s2	2.41606e-06			khdrbs2	0.114821								larp4ab
								hnrnpub	3.95398e-26											nsun2			khsrp	4.48858e-05							eif3k	1.17573e-05			eif3i	0.116497								khsrp
								eif3ba	1.39006e-25											hnrnph1l			chd4a	6.55951e-05							u2af2a	1.41681e-05			polr2j	0.116611								chd4a
								ewsr1b	8.14979e-25											mex3b			eif3m	7.37489e-05							msi2b	0.00644766			sf3b4	0.127433								eif3m
								tia1	1.51137e-23											snrpe			eif5a	7.78684e-05											hnrnpc	0.136566								eif5a
								nop53	3.99136e-23											eif3ha			hnrnpl	0.00011206											eif3g	0.139116								hnrnpl
								eif3ea	1.43676e-22											hnrnpub			sf3a2	0.000144668											taf13	0.184102								sf3a2
								sf3b5	1.16254e-21											eif3ba			eif3ea	0.000315152											taf10	0.195447								eif3ea
								snrpb	3.73312e-21											ewsr1b			hnrpkl	0.000335555											rbm25b	0.203872								hnrpkl
								eif5a	6.87421e-20											tia1			hnrnpr	0.000784795											nop53	0.206234								hnrnpr
								eif3s6ip	2.53243e-19											nop53			elavl1b	0.000892588											ewsr1b	0.217844								elavl1b
								eif3g	5.36068e-19											eif3ea			eif2s3	0.000994801											sf3a2	0.230912								eif2s3
								eif3i	2.78056e-17											sf3b5			hnrnph1l	0.00129405											zranb2	0.313436								hnrnph1l
								hnrnpl	3.20657e-17											snrpb															eif3s10	0.318961								celf2
								khsrp	5.26723e-16											eif5a															eif3ba	0.337165								khdrbs1b
								ewsr1a	9.49671e-16											eif3s6ip															u2af2b	0.341542								mbnl2
								hnrnpa1a	1.66927e-14											eif3g															eif4e1c	0.347778								rbfox3a
								snrpc	1.88518e-13											eif3i															eif1b	0.386894								eif5
								u2af1	4.36967e-13											hnrnpl															hnrnpa1b	0.943951								trim13
								hnrnpc	8.90873e-13											khsrp																								srebf2
								taf15	4.77979e-11											ewsr1a																								upf3a
								nop56	1.71371e-08											hnrnpa1a																								elavl4
																				snrpc																								celf4
																				u2af1																								eif4a2
																				hnrnpc																								eif3g
																				taf15																								pabpc1b
																				nop56																								lsm4
																				rpp25b																								taf7
																				qkia																								papolg
																				polr2d																								sart3
																				csdc2a																								isg20
																				rbfox1																								lsm3
																				rbfox3a																								raly
																				pabpc1b																								snrnp70
																				trmt9b																								eif3s6ip
																				msi2a																								slu7
																																												rbm28
																																												eif5a2
																																												mbnl3
																																												pcbp4
																																												eif3ba
																																												snrpf
																																												eif3f					eif3f
																																												snrpe					snrpe
																																												sf3b5					sf3b5
																																												snrpd3l					snrpd3l
																																												snrpd1					snrpd1
																																												celf3a					celf3a
																																												eif3k					eif3k
																																												u2af2a					u2af2a
																																												msi2b					msi2b
																																												lef1					lef1
																																												rbm14b					rbm14b
																																												hnrnpa1a					hnrnpa1a
																																												nop56					nop56
																																												ewsr1a					ewsr1a
																																												snrpb					snrpb
																																												snrpa1					snrpa1
																																												trmt112					trmt112
																																												sfpq					sfpq
																																												khdrbs2					khdrbs2
																																												eif3i					eif3i
																																												polr2j					polr2j
																																												sf3b4					sf3b4
																																												hnrnpc					hnrnpc
																																												taf13					taf13
																																												taf10					taf10
																																												rbm25b					rbm25b
																																												nop53					nop53
																																												ewsr1b					ewsr1b
																																												zranb2					zranb2
																																												eif3s10					eif3s10
																																												u2af2b					u2af2b
																																												hnrnpa1b					hnrnpa1b
																																												cnbpb					cnbpb
																																												nova2					nova2
																																												csdc2a					csdc2a
																																												mex3b					mex3b
																																												igf2bp3					igf2bp3
																																												stau2					stau2
																																												hnrnpl2					hnrnpl2
[truncated: 1 more columns]

## Sheet: pattern specific RBPs
All_RBPs (n = 120)	shared (n = 4)	matched-divergent (n = 7)	matched-convergent (n = 4)	convergent-divergent (n = 48)	matched-specific (n = 7)	convergent-specific (n = 10)	divergent-specific (n = 52)
arnt2	qkia	qkia	elavl4	qkia	arnt2	elavl3	raver2
celf1	elavl4	elavl4	lef1	khdrbs1a	celf1	nsun2	eif1b
dicer1	pabpc1b	pabpc1b	qkia	hnrnpabb	dicer1	eif3ha	eif4a1a
zfr	lef1	taf7	pabpc1b	hnrnpa0a	zfr	tia1	larp6a
nova1		lef1		cirbpa	nova1	u2af1	lsm6
pum1		zranb2		rbm4.3	pum1	taf15	lsm8
taf3		stau2		hnrnpub	taf3	rpp25b	snrpg
qkia				snrpc		polr2d	eif2s2
elavl4				syncrip		trmt9b	eif4e1c
stau2				stau1		msi2a	magoh
pabpc1b				rbfox1			larp4ab
zranb2				cirbpb			sf3a2
lef1				khsrp			hnrpkl
taf7				chd4a			elavl1b
hnrnpabb				eif3m			celf2
rpp25b				eif5a			mbnl2
hnrnpa0a				hnrnpl			eif5
khdrbs2				eif3ea			trim13
cnbpb				hnrnpr			srebf2
msi2a				eif2s3			upf3a
raly				hnrnph1l			celf4
celf4				khdrbs1b			eif4a2
raver2				rbfox3a			lsm4
celf2				elavl4			papolg
mbnl2				eif3g			sart3
msi2b				pabpc1b			isg20
stau1				eif3s6ip			lsm3
eif3k				eif3ba			raly
cirbpb				snrpf			snrnp70
cirbpa				snrpe			slu7
elavl3				sf3b5			rbm28
khdrbs1a				snrpd3l			eif5a2
nova2				snrpd1			mbnl3
eif3m				eif3k			pcbp4
chd4a				msi2b			eif3f
hnrnpr				lef1			celf3a
rbm4.3				hnrnpa1a			u2af2a
syncrip				nop56			rbm14b
eif2s3				ewsr1a			snrpa1
snrpf				snrpb			trmt112
snrpd3l				khdrbs2			sfpq
khdrbs1b				eif3i			polr2j
snrpd1				hnrnpc			sf3b4
nsun2				nop53			taf13
hnrnph1l				ewsr1b			taf10
mex3b				nova2			rbm25b
snrpe				csdc2a			eif3s10
eif3ha				mex3b			u2af2b
hnrnpub							hnrnpa1b
eif3ba							cnbpb
ewsr1b							igf2bp3
tia1							hnrnpl2
nop53
eif3ea
sf3b5
snrpb
eif5a
eif3s6ip
eif3g
eif3i
hnrnpl
khsrp
ewsr1a
hnrnpa1a
snrpc
u2af1
hnrnpc
taf15
nop56
polr2d
csdc2a
rbfox1
rbfox3a
trmt9b
eif1b
eif4a1a
larp6a
lsm6
lsm8
snrpg
eif2s2
eif4e1c
magoh
larp4ab
sf3a2
hnrpkl
elavl1b
eif5
trim13
srebf2
upf3a
eif4a2
lsm4
papolg
sart3
isg20
lsm3
snrnp70
slu7
rbm28
eif5a2
mbnl3
pcbp4
eif3f
celf3a
u2af2a
rbm14b
snrpa1
trmt112
sfpq
polr2j
sf3b4
taf13
taf10
rbm25b
eif3s10
u2af2b
hnrnpa1b
igf2bp3
hnrnpl2
