# Supplementary material for: The landscape of regulatory genes in brain-wide neuronal phenotypes of a vertebrate brain
Source: eLife. 2021 Dec 13;10:e68224. doi: 10.7554/eLife.68224 (PMC8769648; doi:10.7554/eLife.68224)
Supplement: Figure 5—source data 2. [file elife-68224-fig5-data2.xlsx]

## Sheet: RBPs-all markers
matched_markers				convergent				divergent
9-61	slc32a1	1.70899e-122		1-31		p_val		7-38	nrgna	6.56821e-105
	gad2	1.07114e-115			elavl4	2.12899e-84			bhlhe22	1.88876e-97
	gad1b	1.3234e-112			atp1b1b	7.33755e-42			nell2b	3.78274e-59
	tal1	2.76682e-100			scg2b	1.48628e-40			bhlhe23	1.47399e-54
	gata3	6.2626e-89			tmsb2	9.5188e-40			egr3	2.57822e-46
	tfap2b	1.62603e-69			mtbl	2.01893e-39			zbtb18	7.00264e-43
	tfap2a	5.82276e-68			calm2a	1.34012e-32			itm2cb	1.51637e-41
	slc6a1b	1.63675e-67			si:dkey-33c12.3	6.9263e-32			nr2f1a	6.4131e-41
	atf5b	7.75049e-64			si:dkey-205h13.1	2.81058e-29			zgc:122979	3.07543e-39
	pax7b	1.46475e-62			aldoaa	5.18403e-28			prdm8b	9.45885e-39
	CR936482.1	1.00644e-61			si:dkey-7j14.5	2.45215e-27			dusp2	1.49451e-38
	sox14	2.87058e-59			adcyap1b	3.15213e-27			dusp5	3.33015e-38
	synj1	2.87465e-56			uchl1	2.36486e-26			phlda2	1.42398e-37
	otx2b	4.03454e-56			aldocb	5.56939e-25			junba	1.53782e-37						matched	convergent							divergent
	SYNPR	3.06363e-55			cox6b1	1.01164e-24			neurod6a	3.82849e-37						9-61	1-31	5-6	16-36	2-12	3-11	13-24	17-27	7-38	23-25	27-54	20-41	13-15	2-3	60-62	12-16	17-24	11-30
	pax7a	6.56459e-52			ndufa4	8.52855e-24			egr1	5.72875e-37					RBPs	14	5	44	0	3	17	9	3	35	10	19	6	26	5	41	13	1	17
	tfap2e	7.22661e-52			si:dkey-56f14.4	3.26025e-23			egr4	7.84141e-36					all markers	371	247	282	113	74	256	124	119	398	275	217	403	218	81	146	271	263	414
	iqsec2b	1.74785e-51			lhx1a	2.14404e-22			trim9	6.80933e-35					RBPs/All markers	0.0377358	0.0202429	0.156028	0	0.0405405	0.0664062	0.0725806	0.0252101	0.0879397	0.0363636	0.0875576	0.0148883	0.119266	0.0617284	0.280822	0.0479705	0.00380228	0.0410628
	CU571074.1	2.71435e-50			cox6a1	2.23382e-22			fam43b	1.55609e-32
	zfpm2a	5.14633e-48			cbln1	7.89902e-22			ddx5	8.62598e-32
	pclob	1.35932e-46			tubb2	7.62032e-21			qkia	8.91863e-32
	emx2	3.79083e-46			ndufa12	1.82957e-20			psd3l	2.52414e-31
	adcyap1r1a	5.6419e-46			gap43	2.69957e-20			rasgef1ba	4.18376e-31
	CR383676.2	9.89725e-46			cox7a2a	3.25452e-20			egr2b	4.19134e-31
	cxcl14	3.42258e-45			atp1a3a	1.23555e-19			tspan18a	5.28304e-31
	zgc:198419	5.22024e-44			map1ab	1.65451e-19			sox11b	4.2462e-30
	crabp1a	1.00046e-43			bhlhe41	1.81344e-19			sat1a.2	6.16721e-29
	lhx1a	5.38664e-40			sod1	1.91245e-19			pcp4a	8.80349e-29
	tet3	1.00158e-39			gadd45ba	1.96611e-19			gabrb3	9.71664e-29
	SORCS3	1.98222e-39			cycsb	5.4301e-19			pik3ip1	8.33454e-28
	aff2	2.6579e-39			nr2f2	6.42612e-19			junbb	2.0809e-27
	camk1db	3.42931e-39			slc25a3b	7.26068e-19			lmo4b	1.60138e-26
	slc12a5b	3.88789e-39			atp5mc1	1.01502e-18			cpne2	2.13812e-26
	zfhx4	1.50925e-38			clu	1.41359e-18			egr2a	3.29097e-26
	gigyf1b	9.14941e-38			cbx3b	5.37548e-18			ndufa4l	7.13745e-26
	cplx2	1.87769e-36			stmn2a	1.30536e-17			khdrbs1a	1.72879e-24
	tshz1	1.99755e-36			ngb	1.42902e-17			rcan1a	3.00944e-23
	cnot1	2.21682e-36			cox5ab	1.55907e-17			rergla	5.463e-23
	arnt2	3.73471e-36			rab6bb	2.25858e-17			hsbp1a	5.64482e-22
	tmtc1	1.90511e-35			eno1a	4.03245e-17			fam107b	8.4352e-22
	si:ch73-46j18.5	3.273e-35			vamp1	4.18572e-17			nr2f2	1.84376e-21
	atn1	4.97785e-35			tmsb1	6.89432e-17			palmdb	2.29515e-21
	CR361551.1	6.67942e-35			FP085414.1	8.43215e-17			gem	2.62092e-21
	kcnd2	9.03753e-35			itm2cb	1.06147e-16			ptpn5	3.56918e-21
	sik1	1.19966e-34			mdh2	1.26932e-16			neurod2	6.03783e-21
	tnrc6a	3.29482e-34			maptb	1.30123e-16			si:dkey-110c1.10	2.59019e-20
	nxph1	5.16122e-34			hpcal4	1.43892e-16			map2k1	8.71141e-20
	nexmifb	6.14596e-34			si:ch73-119p20.1	2.23157e-16			2020-09-06	1.30934e-19
	megf8	8.28725e-34			vgf	3.40311e-16			homer1b	1.44264e-19
	cltcb	8.82652e-34			gpia	6.30478e-16			si:dkey-174m14.3	1.47582e-19
	AL929435.1	9.08319e-34			si:dkeyp-69c1.7	7.35847e-16			vim	2.74624e-19
	myrip	1.22737e-33			vdac1	7.38527e-16			hrh3	4.59908e-19
	CU633762.1	6.49742e-33			cntnap2a	9.00325e-16			si:ch211-222l21.1	4.63947e-19
	si:dkey-205h13.1	7.68684e-33			dpm2	1.12594e-15			raver2	1.25449e-18
	cipcb	8.48021e-33			atp5if1a	1.77751e-15			actb1	1.3368e-18
	cebpa	8.81714e-33			si:dkey-35i13.1	2.23765e-15			zgc:64022	3.30229e-18
	NPAS3	1.24614e-32			pgam1a	1.28207e-14			adcyap1r1a	3.53543e-18
	hcfc1b	1.44471e-32			gchfr	1.2973e-14			efna1b	5.19017e-18
	sptan1	1.47422e-32			rgs5b	2.231e-14			nr4a1	5.60418e-18
	tfap2d	1.62425e-32			ndufb3	2.49004e-14			apba2b	5.68407e-18
	egr1	1.89756e-32			slc6a1b	2.51827e-14			rtn4rl2b	1.39266e-17
	slc20a2	2.36097e-32			vat1	3.81404e-14			zeb2b	1.45831e-17
	ssh1b	2.93102e-32			atp5pf	4.01536e-14			draxin	2.33206e-17
	nrxn3a	3.50916e-32			cox6c	4.07877e-14			bcl2l10	2.94878e-17
	dgcr2	3.55862e-32			rheb	4.43865e-14			ccdc136b	3.15105e-17
	kctd15a	5.75457e-32			ndufb5	4.67871e-14			uchl1	5.48746e-17
	si:ch73-335m24.5	6.64385e-32			NDUFC1	6.23356e-14			BX005003.1	5.63907e-17
	zgc:109934	8.20295e-32			cox8a	6.26828e-14			ptprk	2.87091e-16
	celf1	9.44407e-32			rgs16	6.87595e-14			EIF1B	4.32894e-16
	fat1a	1.06831e-31			nanos1	6.9312e-14			hnrnpabb	6.7433e-16
	TENM2	1.15446e-31			si:ch211-235e9.8	1.1044e-13			zic3	1.00446e-15
	zfpm2b	1.19273e-31			mif	1.13627e-13			MPRIP	1.44211e-15
	sypa	2.2917e-31			syt5b	1.30476e-13			fosl2	4.45736e-15
	clasp1a	2.29633e-31			ndufa6	1.37833e-13			jun	4.60477e-15
	ipo7	4.52862e-31			timm23a	1.42066e-13			hspa5	5.71188e-15
	ttyh3a	7.93636e-31			slc35g2a	1.47972e-13			hnrnpa0a	1.7494e-14
	iqsec3a	1.05459e-30			ldha	2.44507e-13			cirbpa	2.12838e-14
	dicer1	1.56655e-30			eef1a1a	3.99886e-13			ak5	2.35838e-14
	trim8b	1.69262e-30			pkma	4.39892e-13			zgc:114118	3.81451e-14
	CU571069.1	2.18005e-30			ndufa3	4.67988e-13			higd1a	7.53989e-14
	shisa7b	2.95068e-30			tomm22	4.89461e-13			eif4a1a	9.46577e-14
	rab3b	3.06704e-30			cox8b	6.21166e-13			nptx1l	9.6134e-14
	srrm4	3.15359e-30			hspe1	7.50639e-13			si:ch73-305o9.3	1.5277e-13
	ywhae2	3.18872e-30			slc17a6b	1.38227e-12			adgrb1b	1.64246e-13
	slc4a10a	3.96411e-30			hk1	1.79282e-12			si:ch211-195b13.1	2.34773e-13
	asap1a	4.20535e-30			hint1	1.80478e-12			smdt1a	2.63019e-13
	atp6ap1a	5.28525e-30			myl6	2.15229e-12			tubb2b	2.73446e-13
	kmt2cb	1.06391e-29			cox7b	2.1539e-12			sulf2b	3.04047e-13
	si:dkeyp-9d4.3	1.54628e-29			plcxd3	2.26612e-12			yaf2	5.55192e-13
	zfr	1.63935e-29			zgc:65894	2.7096e-12			fosb	5.76088e-13
	kif1b	1.80268e-29			srgap1b	3.27695e-12			fam49bb	8.54865e-13
	foxp4	1.99601e-29			sri	3.4182e-12			si:ch211-39f2.3	1.02193e-12
	si:ch211-113g11.6	2.02425e-29			ATP5MD	3.43078e-12			mpped1	1.59243e-12
	kiaa1549la	2.18641e-29			tpi1b	4.13536e-12			nrxn1a	1.86914e-12
	pip5k1cb	2.83065e-29			ptgdsb.2	4.31655e-12			rrad	1.86929e-12
	camta1b	3.5694e-29			COX5B	6.52004e-12			vat1	2.25882e-12
	atf3	4.0536e-29			msi2b	7.14336e-12			si:ch211-203b8.6	4.30954e-12
	rusc2	5.47531e-29			mgst3b	9.56188e-12			rdh12	4.45356e-12
	CR848047.1	6.29471e-29			coro1cb	1.03684e-11			galr2b	4.55362e-12
	GRIK2	7.8566e-29			stmn4l	1.18332e-11			phactr3b	5.34793e-12
	si:ch211-63p21.1	1.05968e-28			pcsk1nl	1.41084e-11			fndc4b	5.74169e-12
	erbin	1.60509e-28			sdhc	1.46751e-11			IGLON5	7.40756e-12
	kdm5ba	1.82795e-28			spock3	1.52686e-11			sept5a	8.68508e-12
	caskin1	1.93924e-28			uqcrb	1.75603e-11			zeb2a	8.82368e-12
	nfia	2.09041e-28			uqcrfs1	1.75932e-11			zfpm2a	1.0698e-11
	zbtb16a	2.44849e-28			sdhdb	1.96732e-11			2020-09-15	1.07081e-11
	arhgap1	3.03096e-28			stmn3	2.07821e-11			sh3bp5la	1.1837e-11
	nat16	3.19478e-28			mllt11	2.12448e-11			mapk1	1.46106e-11
	nova1	3.376e-28			atp5meb	2.58317e-11			camkvb	1.57452e-11
	dusp5	3.99398e-28			atp1b2a	2.59743e-11			mapk11	1.78335e-11
	mink1	4.17706e-28			ndufc2	2.62935e-11			si:dkey-239b22.1	2.04021e-11
	atxn1b	4.94995e-28			ndufa2	2.68294e-11			slc1a4	4.36538e-11
	si:dkey-40m6.8	5.06222e-28			atp5mc3b	2.84839e-11			rbm4.3	4.42755e-11
	zgc:114118	6.09969e-28			dynll2a	2.92966e-11			add3b	5.20879e-11
	auts2a	1.27147e-27			bdnf	3.08218e-11			tpma	5.27425e-11
	tmem94	1.29416e-27			uqcrq	3.62354e-11			ap1s1	7.08756e-11
	agrn	1.51768e-27			ndufa11	4.66444e-11			hmgb2a	9.65027e-11
	fbxl6	1.59005e-27			idh2	4.80285e-11			sept7a	9.99689e-11
	map2	1.67265e-27			sypb	4.9492e-11			si:ch211-168d1.3	1.05577e-10
	fasn	2.21707e-27			cox4i1	5.70235e-11			dnajb1b	1.11218e-10
	nr1d2b	2.93741e-27			cyc1	5.80855e-11			mcl1a	1.4532e-10
	per1b	4.35235e-27			cox5aa	6.46548e-11			robo1	2.46724e-10
	cebpb	4.72179e-27			nr2f1a	8.40768e-11			foxg1a	4.54372e-10
	BX548062.1	4.80985e-27			atp1b1a	8.45469e-11			hnrnpub	7.54761e-10
	zgc:91818	5.00338e-27			atp5f1c	1.04723e-10			BX569787.1	7.60316e-10
	adgrl3.1	7.35238e-27			atp2b2	1.12658e-10			iqsec2b	7.91519e-10
	AL590149.1	7.38168e-27			uqcrc2b	1.36078e-10			znf536	8.26621e-10
	sgip1a	7.43742e-27			ier2a	1.41757e-10			sdc4	8.42625e-10
	nfasca	1.04823e-26			pygmb	1.6006e-10			rsrp1	8.98749e-10
	atp1b3b	1.16564e-26			ndufb9	1.70144e-10			ywhaz	9.05493e-10
	nlgn2a	1.4769e-26			fndc4b	1.87691e-10			cct7	1.04968e-09
	kdm7ab	1.61463e-26			si:dkeyp-72h1.1	2.17914e-10			si:dkey-56m19.5	1.05759e-09
	CR388040.1	1.79238e-26			pim1	2.20861e-10			lrrc4.1	1.15917e-09
	smad3a	2.11017e-26			rab41	2.39572e-10			prelid3b	1.58029e-09
	pum1	2.61925e-26			ndufs7	2.4517e-10			hmga1a	1.72269e-09
	amd1	3.26159e-26			ndufs3	2.82737e-10			tpt1	1.77397e-09
	ssbp4	3.48505e-26			id4	3.122e-10			si:ch211-12m10.1	1.83779e-09
	zgc:194578	3.54607e-26			scg5	3.40365e-10			CDPF1	2.17661e-09
	fut8a	3.83033e-26			atp2b3b	3.7691e-10			seta	2.28047e-09
	slc9a6a	3.93805e-26			smdt1a	4.41402e-10			rhoaa	2.47769e-09
	slc25a36a	5.11092e-26			atp5mc3a	4.70996e-10			tuba1a	2.78184e-09
	si:ch211-117c9.5	6.0207e-26			ube2e1	4.77137e-10			si:ch211-153l6.6	2.85823e-09
	dctn1b	6.36684e-26			si:zfos-169g10.3	5.06227e-10			dtnbp1a	2.98899e-09
	pgam1a	6.3935e-26			tuba2	5.47194e-10			prkcbb	3.62918e-09
	tenm4	6.47956e-26			sept5a	6.30743e-10			gng13b	3.72549e-09
	sema6e	8.20907e-26			nhlh2	6.5227e-10			atp5mc3b	3.85845e-09
	zeb2a	9.88749e-26			sdhb	7.0546e-10			amer2	4.40675e-09
	mycbp2	1.66082e-25			CDPF1	7.27137e-10			atp2a3	4.93295e-09
	kif26ba	2.24653e-25			arhgdia	7.31865e-10			mgll	5.69815e-09
	rfx7b	2.43089e-25			BX470182.1	7.82902e-10			srsf3b	5.78744e-09
	pth2r	2.59282e-25			ndufv3	8.16774e-10			camk1db	7.56043e-09
	rapgef2	2.87225e-25			gdi1	8.47593e-10			ppp1r10	7.60061e-09
	prrc2a	4.75351e-25			cox14	9.89345e-10			map2	7.60589e-09
	klf7b	5.18637e-25			capns1b	9.96612e-10			tob1a	8.09707e-09
	nexmifa	5.45999e-25			si:ch211-113g11.6	1.05206e-09			asphd2	8.5445e-09
	parp6b	5.56408e-25			hccsb	1.13492e-09			ywhaqb	8.61317e-09
	id1	6.52582e-25			pam	1.16873e-09			plcxd3	9.01048e-09
	nhsb	7.11358e-25			atp5mea	1.1691e-09			kcnn3	9.63079e-09
	insm1a	8.66014e-25			usp2a	1.23518e-09			hist2h2l	1.03908e-08
	prr12a	1.0231e-24			ahcyl1	1.24941e-09			ngb	1.06374e-08
	baz2a	1.08783e-24			ndufab1b	1.39628e-09			unc119b	1.10662e-08
	rasd4	1.09519e-24			ube2v2	1.40282e-09			h2afvb	1.4379e-08
	zmiz1a	1.14697e-24			mpc1	1.54031e-09			prkar2aa	1.69031e-08
	si:ch211-244c8.4	1.43663e-24			pole4	1.54409e-09			sumo3b	1.78566e-08
	sv2a	1.61268e-24			pnpo	1.56318e-09			gphnb	1.86505e-08
	cdh11	1.96559e-24			plxna4	1.61414e-09			mtdha	2.20628e-08
	chchd10	2.12034e-24			vav3b	1.89294e-09			snrpc	2.21007e-08
	dyrk1ab	2.42511e-24			zgc:122979	2.02989e-09			larp6a	2.29871e-08
	pcdh17	3.02494e-24			ntng1a	2.36821e-09			phf24	2.56691e-08
	syngap1b	3.20921e-24			zgc:162989	2.38689e-09			slitrk4	2.76791e-08
	cbln2b	3.88005e-24			cxxc4	2.50771e-09			syncrip	2.80062e-08
	rai1	5.5811e-24			anxa13	2.60853e-09			kiaa1549la	3.12674e-08
	zgc:123105	6.2627e-24			lin7b	2.72435e-09			rbbp4	4.54749e-08
	kidins220b	8.98213e-24			ppt1	2.86839e-09			prickle2b	4.7629e-08
	BX470264.1	9.47226e-24			pfkpa	2.9032e-09			znf827	4.76864e-08
	grin2ab	9.71424e-24			uchl5	2.9223e-09			cct4	4.97246e-08
	camk2b1	1.03631e-23			fam19a5a	3.41586e-09			lsm6	5.13013e-08
	prkar2aa	1.63707e-23			smdt1b	3.50131e-09			ilf3b	5.4086e-08
	cd99l2	1.83768e-23			si:dkey-17e16.10	4.11844e-09			sept9b	6.25033e-08
	nkd1	2.38721e-23			cdipt	4.14436e-09			syt5b	7.28707e-08
	rims1a	2.51975e-23			ckmt1	4.44347e-09			sdcbp2	8.02941e-08
	taf3	2.61037e-23			acbd7	4.90508e-09			ets2	8.81134e-08
	nwd2	2.75354e-23			rwdd1	5.30053e-09			chga	8.90853e-08
	CR352285.1	2.79905e-23			cetn3	5.33236e-09			h2afva	1.03896e-07
	ttll7	3.3637e-23			atp5fa1	5.7883e-09			sinhcafl	1.04879e-07
	camta1a	3.95931e-23			emc6	6.42356e-09			anks1b	1.04913e-07
	sgip1b	4.20275e-23			rac3a	6.95441e-09			h3f3b.1	1.09712e-07
	tnip1	4.21482e-23			efnb3b	7.06615e-09			prkag2a	1.20462e-07
	agap1	5.03158e-23			rims2a	9.20382e-09			dpysl5a	1.2651e-07
	lmnb2	6.6204e-23			neurod1	1.28916e-08			cxxc5a	1.3702e-07
	arvcfb	8.61085e-23			dusp2	1.39263e-08			cotl1	1.72191e-07
	slc44a1b	1.07456e-22			tnfaip2a	1.45947e-08			ddx39ab	2.67401e-07
	kansl1a	1.1619e-22			cbx7a	1.74895e-08			zgc:92140	2.95849e-07
	atp1b1b	1.26709e-22			aco2	1.78775e-08			vamp4	3.59469e-07
	ap1m1	1.36051e-22			ndufb2	1.79487e-08			mrpl12	3.86513e-07
	meis2a	1.44975e-22			spry4	1.90773e-08			sdf2l1	3.99405e-07
	mt-atp8	1.66474e-22			aldh2.1	2.12824e-08			2020-09-02	4.19133e-07
	pbxip1a	1.76592e-22			PCP4L1	2.24036e-08			hsp90b1	4.36292e-07
	meis1b	2.09802e-22			eef2l2	2.62114e-08			rps17	4.75061e-07
	si:ch211-150g13.3	2.63654e-22			chchd10	2.7936e-08			si:dkey-95p16.2	4.85308e-07
	atp1a3a	2.80066e-22			rgma	2.82572e-08			stau1	4.88765e-07
	pfkpa	4.47038e-22			si:dkey-16p21.8	2.94067e-08			snrpd2	5.92862e-07
	foxb1a	4.65022e-22			SMIM18	2.98728e-08			laptm4b	5.9614e-07
	fstl5	6.40091e-22			sh3glb2b	3.2045e-08			rnd3a	6.12762e-07
	jund	6.99765e-22			arf6a	3.31058e-08			selenof	6.30996e-07
	clstn2	7.25709e-22			nrsn1	3.54921e-08			npm1a	6.59073e-07
	stox2a	7.36977e-22			camk1db	3.93003e-08			smarca4a	6.74375e-07
	apc	8.27009e-22			cox17	4.83397e-08			syngap1b	7.19267e-07
	r3hdm1	9.46583e-22			prmt1	5.03224e-08			nr4a3	7.44409e-07
	ash1l	9.87567e-22			tomm20a	5.29973e-08			psmd11b	7.5329e-07
	zc3h11a	1.05253e-21			cry1aa	6.03572e-08			unm_hu7912	7.80043e-07
	atp2b2	1.0715e-21			cox7a3	6.20436e-08			prdx2	7.97777e-07
	dennd5b	1.66181e-21			sub1b	6.25117e-08			rab41	8.29479e-07
	kcnn1a	1.75801e-21			sat1a.2	6.50681e-08			insm1b	8.31116e-07
	slc25a11	1.96112e-21			stau1	6.94871e-08			tmem258	9.15285e-07
	nrxn2b	2.21189e-21			mrpl12	8.19801e-08			rpl22l1	9.26672e-07
	stxbp5a	2.28735e-21			cmc1	8.88919e-08			2020-03-08	1.05409e-06
	arhgap21b	2.62326e-21			pcdh17	9.08613e-08			hspa4a	1.06032e-06
	cpeb4a	2.70112e-21			spag7	9.1935e-08			zgc:92818	1.08689e-06
	rorab	2.84773e-21			nedd8l	1.08627e-07			rps24	1.17251e-06
	pho	3.44348e-21			hes6	1.1335e-07			acsl4a	1.23509e-06
	AL845324.1	5.42446e-21			bcat2	1.13383e-07			nme2b.1	1.26661e-06
	atp2b3b	1.33152e-20			eif3k	1.48793e-07			rhoab	1.5709e-06
	sec62	2.16018e-20			abhd3	1.66841e-07			rgs5b	1.80078e-06
	zeb2b	3.072e-20			zgc:152863	2.01417e-07			fus	1.93509e-06
	ttyh3b	3.22948e-20			junba	2.20199e-07			cdc42l	2.08138e-06
	lsm12b	4.4454e-20			cacybp	3.13182e-07			sec11a	2.1194e-06
	zfhx3	4.45298e-20			vapal	3.33546e-07			stc2a	2.12165e-06
	bptf	5.44831e-20			qdpra	3.51247e-07			gria2b	2.23197e-06
	bsnb	5.68375e-20			oaz2b	3.78876e-07			chrac1	2.25026e-06
	cadm1b	6.13138e-20			islr2	4.4655e-07			srsf7a	2.5789e-06
	hdac9b	8.46712e-20			CU468917.1	4.559e-07			zgc:91910	2.60264e-06
	plcxd3	1.01157e-19			cd99l2	4.8664e-07			lrp8	2.69747e-06
	ajap1	2.61385e-19			elovl6	6.64541e-07			rcor2	2.69824e-06
	ddit3	4.17717e-19			khdrbs2	8.29066e-07			smarce1	2.75357e-06
	ccdc136b	1.06663e-18			apln	1.52079e-06			apex1	2.79283e-06
	ppp1cb	1.29409e-18			egr4	3.25189e-06			il1rapl1a	3.25719e-06
	rnf44	1.39362e-18			baz2ba	3.68154e-06			grin2bb	3.46993e-06
	dnmt3ab	1.57797e-18			zgc:198419	4.73855e-06			calm1b	3.71024e-06
	rgs5b	2.07568e-18			fstl5	5.04983e-06			xbp1	3.88745e-06
	ank2b	3.18968e-18			chrna5	8.61675e-06			rbfox1	4.21615e-06
	nfil3-5	4.40318e-18			gng13b	1.31827e-05			mbpb	4.46934e-06
	mcama	8.47879e-18			pou3f3b	1.95712e-05			lsm8	5.12601e-06
	si:dkey-35i13.1	1.5096e-17			sik1	2.04484e-05			cacng8a	5.30737e-06
	dtnbp1b	2.06244e-17			dusp5	2.19499e-05			si:ch211-51e12.7	6.04423e-06
	syt1a	2.08719e-17			meis1b	0.00229849			pdap1a	6.13685e-06
	elmod1	9.28824e-17			calb2a	0.00279479			ccnl1b	6.15545e-06
	cct4	9.85548e-17			mt2	0.00453235			lzic	6.167e-06
	zgc:165461	2.61164e-16		44322	cirbpb	0			midn	6.2408e-06
	junba	2.69991e-16			mab21l2	2.49549e-299			ilf2	6.54252e-06
	npas4a	3.40307e-16			rpl17	3.36611e-288			dnajb4	7.44701e-06
	atp1a1b	6.39889e-16			rpl24	1.31198e-284			gria1a	7.59294e-06
	tmem178b	2.75198e-15			tpt1	1.10529e-278			FO904885.3	7.78449e-06
	rnd3a	4.15261e-15			rps14	1.01762e-272			arf2a	7.98003e-06
	qkia	6.85402e-15			rps8a	2.44375e-272			hdac1	8.02703e-06
	CR847531.1	7.14218e-15			rps15	1.64201e-271			zgc:56493	8.05835e-06
	elavl4	8.11542e-15			rpl10a	2.3102e-266			btbd10a	8.45113e-06
	atp6v0ca	2.01797e-14			rpl10	6.61633e-254			gng7	8.93133e-06
	mt-nd2	4.37815e-14			rps3a	9.52627e-238			smarcd1	9.36424e-06
	mt-nd1	6.10969e-14			eef1g	2.62807e-236			uba52	9.55059e-06
	mtbl	1.62812e-13			zgc:114188	6.53252e-234			hint1	9.79678e-06
	ywhaqb	3.15797e-13			rpl21	7.1827e-226			atf4a	1.04889e-05
	mt-nd3	4.78349e-13			rps25	2.19421e-212			mta2	1.06828e-05
	fabp7a	5.83649e-13			nme2b.1	1.07983e-210			dnajb11	1.09684e-05
	bcl11ba	6.41409e-12			rpl6	9.70372e-209			ppp4cb	1.16793e-05
	stau2	6.89943e-12			rpl12	2.54353e-205			uchl3	1.18524e-05
	mt-nd4	4.44357e-11			rps10	5.21529e-205			zgc:100906	1.25863e-05
	stmn2b	1.03066e-10			rpl26	1.79809e-199			tcf3b	1.32325e-05
	clstn1	6.37509e-10			rps11	5.30556e-199			pag1	1.34529e-05
	atp5mc3b	3.54355e-09			rack1	7.11655e-198			abcf1	1.37731e-05
	atp5mea	6.32847e-09			rps23	7.89053e-198			pknox2	1.40971e-05
	sox6	1.0075e-08			rps27a	7.35032e-197			cd99l2	1.41037e-05
	glula	1.15536e-08			rpl22	9.08202e-194			snrpg	1.52705e-05
	stx1b	4.72157e-08			rps24	3.21252e-189			rps8a	1.55015e-05
	cox6b1	1.16083e-07			eef1b2	1.18332e-184			eif2s2	1.56093e-05
	il1rapl1a	2.08296e-07			rpl9	1.11182e-176			camk2a	1.58372e-05
	mibp2	2.85849e-07			rps3	7.35008e-171			arf5	1.58576e-05
	pspc1	3.03999e-07			sox4a	1.14149e-169			bsnb	1.61174e-05
	pvalb6	4.8411e-07			rpl13a	1.74151e-168			rnf7	1.645e-05
	zgc:113208	5.08399e-07			meis1b	2.13074e-168			drap1	1.70444e-05
	kctd4	6.97373e-07			rps17	4.79016e-167			psmb7	1.75042e-05
	rpl31	8.74213e-07			rpl5b	1.01205e-164			oser1	1.83871e-05
	bcl7a	9.17026e-07			ebf3a	5.19632e-162			si:ch211-194k22.8	1.8512e-05
	cpne4a	1.79503e-06			cd99l2	4.09979e-157			canx	1.86e-05
	lmo3	2.33871e-06			zc4h2	2.0621e-141			slc30a1a	1.90402e-05
	emc3	3.9486e-06			rpl31	4.90639e-140			fgf13b	1.91632e-05
	tmem167a	4.69777e-06			ppiaa	4.01304e-136			eif4e1c	1.96054e-05
	tpi1b	5.10006e-06			rpl23a	6.66957e-136			dynll2b	1.97551e-05
	cbln1	5.28228e-06			rps26l	1.32365e-131			slc25a55a	2.06537e-05
	vps35	5.32836e-06			meis2b	1.72093e-128			ip6k2a	2.11165e-05
	med10	5.43163e-06			sinhcafl	1.90374e-128			mfsd2ab	2.21151e-05
	bcl2l10	5.5347e-06			rsrp1	3.0658e-128			ywhaqa	2.38219e-05
	arl4ab	7.58642e-06			hmgb2b	5.67122e-127			usp2a	2.47631e-05
	pabpc1b	1.32785e-05			tubb5	2.9319e-119			hsph1	2.87004e-05
	nap1l4b	1.57166e-05			rpl22l1	1.24163e-112			psmd1	2.9235e-05
	tmsb1	1.68449e-05			dnajb1b	1.35842e-107			eef1b2	2.95182e-05
	stmn4l	1.71989e-05			ctnnbip1	3.55273e-107			si:dkey-153k10.9	2.99488e-05
	asb5b	1.76732e-05			eef2b	8.47331e-107			glipr1b	3.08342e-05
	dnajb1b	2.35686e-05			mab21l1	3.37439e-106			psmb2	3.14494e-05
	mab21l2	2.49433e-05			cirbpa	4.72614e-104			mibp2	3.17367e-05
	ldb2a	2.58016e-05			pou3f1	8.40524e-104			srp9	3.20313e-05
	rbbp4	2.59141e-05			elavl3	1.87232e-103			magoh	3.41912e-05
	btbd2a	2.79448e-05			tubb2b	1.39143e-101			cirbpb	3.80474e-05
	snap25a	3.0521e-05			khdrbs1a	2.64295e-101			larp4ab	3.84614e-05
	crfb6	3.20449e-05			uba52	3.13731e-101			tuba8l4	3.93783e-05
	ankrd46a	3.88985e-05			rpl14	4.2589e-101			slc2a3a	4.06149e-05
	bnip3lb	4.12015e-05			tuba1a	5.565e-100			rpl17	4.20666e-05
	sh3bp5b	4.30474e-05			roraa	2.60817e-99			khsrp	4.48858e-05
	acbd7	4.91973e-05			barhl1a	5.28727e-99			kif1aa	4.5704e-05
	olfm1a	5.39764e-05			en2b	3.40801e-97			psmb3	4.84415e-05
	cope	5.65189e-05			si:ch211-288g17.3	8.5693e-96			psmd8	4.90637e-05
	her15.1	7.41693e-05			tmsb	3.38456e-93			atf6	5.03457e-05
	kcnip1b	8.43395e-05			marcksa	9.31272e-93			pop7	5.35606e-05
	uxt	8.50541e-05			si:dkey-56m19.5	2.42206e-90			robo2	5.37314e-05
	cited4b	0.000103011			pbx3b	2.47771e-89			rcc2	5.51957e-05
	pou3f1	0.000106272			hapln1a	2.90653e-88			prmt1	6.09713e-05
	pou4f2	0.000121398			btf3	4.38831e-87			hpca	6.29672e-05
	cbx7a	0.000124748			barhl2	3.9151e-86			ssu72	6.34231e-05
	si:dkey-56f14.4	0.000145245			ran	3.4905e-84			dbi	6.43027e-05
	zranb2	0.000145488			mibp2	9.55758e-84			chd4a	6.55951e-05
	baalcb	0.000158257			atf4b	3.15928e-82			ivns1abpa	7.15276e-05
	fbxl5	0.000174039			mycn	1.97137e-81			lrrtm2	7.31274e-05
	srsf9	0.000176548			hdac1	2.32398e-75			eif3m	7.37489e-05
	zgc:55733	0.000186518			hmga1a	3.2414e-72			klf7b	7.47284e-05
	psmd13	0.000218627			h3f3b.1	1.52015e-71			ppp1cab	7.60498e-05
	ppp3r1a	0.000281072			fabp3	3.5457e-71			eif5a	7.78684e-05
	pcmtd1	0.000349947			sox11a	4.54683e-69			rpl26	8.36903e-05
	pou4f1	0.000359711			tmeff1b	6.03117e-69			chmp2bb	9.76028e-05
	spry4	0.000409077			hnrnpabb	6.84715e-69			camk4	9.79562e-05
	gpr22b	0.000434845			hmgb1b	7.15471e-68			phf5a	9.94135e-05
	gas7a	0.0004842			si:ch211-137a8.4	4.40701e-67			her15.1	0.000111927
	rassf2a	0.000486195			nfil3-5	2.11691e-65			hnrnpl	0.00011206
	mapk14b	0.000541081			nova2	2.38323e-64			tmem106ba	0.000112603
	nos1apb	0.000555493			rpl4	3.08404e-64			b3galt2	0.000120132
	emc10	0.000566574			eif3m	1.03328e-63			slmapb	0.000128106
	si:ch211-151p13.8	0.000577253			actb1	2.7297e-63			ndufc2	0.000129358
	trir	0.000610721			chd4a	8.96312e-63			mink1	0.000140165
	flrt3	0.000662813			hnrnpr	3.30333e-61			sf3a2	0.000144668
	syf2	0.000663845			rps27.2	1.80991e-60			insig1	0.000152252
	nanos1	0.00066854			rbm4.3	1.26177e-59			rtn4rl2a	0.000153063
	dync1li1	0.000735212			mcama	2.84657e-58			rps11	0.000154611
	tsc22d3	0.000832806			marcksb	7.06058e-58			si:ch211-198a12.6	0.000161758
	ak5	0.000839151			hnrnpa0a	8.27917e-58			rpl6	0.000163775
	ISCU (1 of many)	0.0008799			smarce1	6.47033e-57			ncalda	0.00017256
	amer2	0.000888792			smarcb1b	2.07732e-56			ap1m1	0.000173335
	cdk5r2b	0.000949737			hunk	4.16114e-56			cdkn2aipnl	0.000176153
	ppm1la	0.000966676			syncrip	1.87922e-55			tubb5	0.000188938
	carmil2	0.000984711			ppp1r14c	8.52013e-55			inip	0.00019308
	vamp1	0.000984814			sumo3a	3.35196e-53			bhlhe40	0.000193584
	lgmn	0.00105829			hp1bp3	4.50854e-50			nabp1a	0.000197542
	gnai2b	0.00116802			serbp1a	1.00009e-48			slc16a9b	0.000198502
	gnao1a	0.00138469			nono	6.18874e-48			cct3	0.000205272
	arpp19a	0.00153253			fus	2.61544e-47			nckap1	0.000215147
	her15.2	0.00164953			cxxc5a	4.77132e-47			polb	0.00021569
	gabra1	0.00171681			adh5	6.74723e-46			nup50	0.000227569
	jagn1a	0.00192225			bnc2	1.61988e-45			cbx1a	0.000227933
	h3f3c	0.00194569			zbtb20	3.17513e-45			pdia6	0.000241031
	phf20b	0.00202997			cct4	5.37367e-44			map1ab	0.000244756
	oprl1	0.00217551			apex1	6.45244e-44			nlgn3a	0.000253418
	bdnf	0.00220037			cnp	2.518e-43			nono	0.000302453
	nrgna	0.00227417			eif2s3	3.56228e-42			tle2a	0.00031011
	ppt1	0.00233864			pbx1a	4.04033e-42			madd	0.000314762
	atf7ip	0.00235316			gtpbp4	1.87559e-41			eif3ea	0.000315152
	cdipt	0.00264322			snrpf	2.22245e-41			zgc:153615	0.000315292
	islr2	0.00291805			lef1	3.13109e-41			mid1ip1b	0.000315521
	sox11b	0.00306461			rcc2	5.00961e-41			erlin1	0.000323679
	lin7b	0.00311564			rpl5a	6.85612e-41			tmco1	0.000326597
	rcan3	0.00331615			cited4b	1.30409e-40			hnrpkl	0.000335555
	si:dkey-174m14.3	0.00378552			nsa2	3.22205e-40			arhgap21b	0.000359947
	gabrb4	0.00440355			prdx2	3.87778e-40			ppiaa	0.00044119
	ube2d2	0.00480341			en2a	1.43158e-39			rack1	0.000469696
4-32	dlx5a	0			pou2f2a	1.81399e-39			dusp6	0.000509392
	dlx2a	0			fscn1a	2.2949e-38			kctd5a	0.000548704
	lhx6	0			zgc:153115	2.96346e-37			zgc:77880	0.000702807
	lhx8a	0			chd4b	7.16726e-37			CR974456.1	0.000711558
	sp9	0			arf5	2.49006e-36			gkap1	0.000723218
	dlx6a	0			fxyd6l	3.5714e-36			ssbp4	0.00072342
	vax1	0			cct8	5.57734e-36			rpl9	0.00076049
	dlx1a	0			CCT2	9.11072e-36			hnrnpr	0.000784795
	dlx2b	0			thsd7aa	1.14246e-35			camk2b1	0.000800088
	prdm12b	2.03462e-301			smc1al	1.22367e-35			actl6a	0.000884309
	islr2	6.31997e-238			cct5	3.30739e-35			elavl1b	0.000892588
	foxg1a	2.4989e-224			pbx4	4.66068e-35			ppp2r2ba	0.000904033
	kctd4	6.82379e-191			rbbp4	5.92341e-35			sptan1	0.000965599
	isl1	4.31916e-126			snrpd3l	1.58622e-34			gse1	0.00098172
	zic1	2.01659e-103			srsf4	2.75736e-34			eif2s3	0.000994801
	si:ch211-222l21.1	2.3517e-98			khdrbs1b	2.90703e-34			pik3r3b	0.00105565
	pax6a	2.82257e-98			snrpd1	1.30362e-33			eef1g	0.00127561
	ncaldb	4.32071e-98			srsf3b	1.33122e-33			hnrnph1l	0.00129405
	gad2	1.29179e-86			pou4f2	1.48493e-33			rps27a	0.00171912
	rasd1	5.44367e-81			ilf2	8.07812e-33			rps25	0.00189351
	six3a	1.0483e-63			phc2a	8.85293e-33			igfbp5b	0.00208726
	necab1	5.1498e-56			sox4b	9.14284e-33			gadd45ba	0.00212612
	rrad	3.80414e-55			zgc:153867	1.14484e-32			mycn	0.00218801
	gap43	4.31476e-55			ddx39ab	1.17245e-32			id2b	0.00229911
	cadm1b	3.24767e-53			pou4f1	2.5525e-32			si:ch211-261n11.7	0.00287509
	ddx5	1.56193e-49			atrx	6.80931e-32			calr	0.00442508
	plcxd3	1.61151e-49			ssbp3b	2.02275e-31			cox6b1	0.00491307
	si:dkey-175g6.2	1.36008e-45			cct7	5.07412e-31		23-25	nrgna	6.60327e-174
	psd3l	2.37997e-43			uck2a	1.04153e-30			si:dkey-35i13.1	3.41452e-121
	efnb3b	4.65214e-43			nsun2	1.06516e-30			bnc2	1.11809e-98
	kidins220b	1.09837e-42			golga7ba	1.28965e-30			ebf3a	8.55874e-91
	vat1	1.64211e-42			tcea1	1.37472e-30			pvalb7	2.53121e-74
	zic3	8.43758e-42			nfil3	1.47856e-30			nrn1a	4.7184e-73
	cpne2	2.44161e-41			hnrnph1l	2.56264e-30			ccdc136b	3.68328e-70
	plk2b	1.28803e-39			lmo3	2.72862e-30			ppp1r1c	2.47807e-64
	tmsb	5.27159e-38			pik3r3b	5.19342e-30			tfap2a	1.489e-63
	plk3	1.45436e-37			soga1	1.54853e-29			shox2	1.99841e-62
	hnrnpabb	1.6347e-34			mex3b	6.65438e-29			cntln	4.01846e-61
	adcyap1r1a	1.00713e-30			rsl24d1	8.51817e-29			pcp4a	1.46818e-60
	mt2	1.3552e-28			mycla	2.75052e-28			r3hdm1	6.20451e-55
	zic2a	2.93984e-28			nr2f1a	7.57306e-28			prkcbb	9.96335e-49
	rpp25b	2.33617e-27			snrpe	1.20452e-27			fam107b	2.98142e-48
	syt5b	4.10767e-27			si:dkey-286j15.1	1.82042e-27			egr3	9.47227e-47
	phlda2	5.80971e-27			ddit3	6.28148e-27			rbfox1	1.4797e-46
	r3hdm1	7.79021e-27			eif3ha	1.19462e-26			hsbp1a	2.4531e-46
	sept5a	6.54579e-25			tcp1	1.98604e-26			gng13b	6.06184e-45
	six3b	1.22496e-23			cbx3a	3.89083e-26			ppp3cb	8.94004e-45
	glipr1b	4.16292e-21			hnrnpub	3.95398e-26			shox	1.85501e-44
	efnb2a	4.41145e-21			eef1db	1.0133e-25			raver2	2.68159e-44
	efhd1	3.30049e-19			cct3	1.04443e-25			celf2	1.04792e-41
	qkia	9.67497e-19			chn1	1.26713e-25			tfap2b	5.96347e-41
	chst2b	2.14387e-18			eif3ba	1.39006e-25			btbd6a	1.09373e-40
	nrgna	1.0773e-15			si:dkey-12h9.6	3.08028e-25			pvalb6	3.62438e-39
	her4.1	1.90686e-15			ppp1r10	5.25093e-25			sulf2b	1.72949e-38
	nr2f2	1.99653e-15			ewsr1b	8.14979e-25			kctd15a	4.23387e-38
	srrm4	3.22397e-15			mbd3a	2.5014e-24			camk2a	2.5622e-34
	her4.2	2.31898e-14			psmb1	3.57171e-24			iqsec2b	6.15457e-34
	hnrnpa0a	5.60974e-14			si:ch211-51e12.7	1.08339e-23			alcamb	8.21168e-34
	dnajb4	5.77535e-14			tia1	1.51137e-23			si:dkey-112a7.4	8.58499e-34
	gadd45bb	2.60407e-11			pomp	3.12062e-23			si:ch211-168d1.3	1.09695e-33
	apln	2.77352e-11			mid1ip1b	3.33374e-23			ctnnb1	1.50528e-33
	adgrb1b	2.97207e-11			nop53	3.99136e-23			palmdb	1.4294e-32
	her4.4	6.36862e-10			tfap2d	1.09654e-22			tcf7l2	2.85556e-32
	rgs5b	3.03851e-09			eif3ea	1.43676e-22			camk4	6.72429e-32
	si:dkey-56m19.5	1.33357e-07			eif4ebp1	2.02859e-22			junba	6.52292e-31
	dusp5	5.07499e-07			pou3f3b	2.66578e-22			MPRIP	9.76213e-31
	bhlhe41	5.90333e-07			caprin1b	8.17578e-22			homer1b	2.23555e-30
	hmga1a	7.04896e-07			slc25a55a	8.97526e-22			gabra4	3.66425e-30
	sst1.1	9.21919e-06			sf3b5	1.16254e-21			nfia	5.25851e-30
44308	sp9	1.47211e-77			cdc34b	1.43481e-21			si:ch73-305o9.3	4.52703e-29
	zic3	3.40383e-53			scrt2	3.43286e-21			mab21l1	4.82805e-29
	islr2	3.69584e-42			snrpb	3.73312e-21			atp2b2	5.73902e-29
	dlx5a	2.30455e-38			plppr3a	3.91011e-21			ppp1r14c	1.08857e-28
	slc6a1b	1.85324e-37			zgc:174906	8.91574e-21			camk2b1	2.53072e-27
	gad1b	7.34606e-37			srsf9	1.7624e-20			robo1	2.97794e-27
	zic2a	2.95343e-35			zfhx3	3.93085e-20			sept5a	3.4618e-27
	prdm12b	2.57459e-32			ddx39aa	4.76991e-20			si:dkey-172j4.3	4.43086e-27
	dlx2b	1.19034e-30			eif5a	6.87421e-20			mcama	5.09178e-27
	gad2	8.21972e-26			smarcd3b	1.36428e-19			si:ch211-203b8.6	1.7169e-26
	pax6a	3.20233e-25			kdm1a	2.43543e-19			rhoab	1.81135e-26
	meis2a	8.48307e-23			eif3s6ip	2.53243e-19			rdh12	7.46641e-26
	sp8a	1.37326e-22			cct6a	3.31494e-19			calm1b	1.06237e-25
	zic1	4.25991e-22			eif3g	5.36068e-19			olfm1a	4.76813e-25
	dlx6a	1.68232e-20			fmnl2b	7.31738e-19			pou3f3b	7.41327e-24
	rpp25b	2.41915e-19			brd7	8.88305e-19			zeb2a	1.67407e-23
	vax1	1.13265e-18			pacsin1b	9.71718e-19			pou3f3a	6.6296e-23
	foxg1a	3.08564e-18			nkain1	2.77638e-18			tox	1.12158e-22
	six3a	8.01122e-18			si:ch73-386h18.1	3.22523e-18			zgc:64022	2.25914e-22
	elavl4	1.18764e-16			tgif1	4.822e-18			lrmp	2.41928e-22
	dlx2a	2.01062e-15			h2afva	7.95856e-18			hivep1	3.25932e-22
	pbx3b	3.12429e-15			oip5-as1	1.33992e-17			nr2f2	4.78633e-22
	snap25a	5.14824e-15			robo1	2.43997e-17			sox11b	8.40951e-22
	khdrbs2	1.72382e-14			eif3i	2.78056e-17			cox8b	1.30315e-21
	bcl11ba	1.48794e-12			hnrnpl	3.20657e-17			oaz2b	2.29091e-21
	nxph1	5.35009e-12			pik3r3a	5.59318e-17			arhgdig	6.19008e-21
	cadm1b	7.74732e-12			dbn1	8.65644e-17			add3b	6.7981e-21
	basp1	1.35923e-11			si:dkey-42i9.4	8.65894e-17			zeb2b	1.80752e-20
	camk2n1a	1.80423e-10			lhx2b	1.30322e-16			si:zfos-2326c3.2	4.31617e-20
	pcp4a	1.28341e-09			stmn1a	1.33019e-16			ngef	6.41175e-20
	lhx1a	1.71003e-09			ddx21	1.38504e-16			grm5a	1.33872e-19
	cox6b1	1.91565e-09			insm1a	1.402e-16			rasgef1bb	4.46295e-19
	glula	1.94886e-09			top2b	1.62381e-16			cebpd	5.04605e-19
	dpysl5b	7.53884e-09			BX927184.1	1.65142e-16			snap25a	6.83412e-19
	id4	2.21732e-08			si:dkey-28b4.7	2.70568e-16			mef2cb	6.92736e-19
	syt12	4.34946e-08			tshz2	2.81387e-16			her6	1.24496e-18
	pcdh19	6.25627e-08			actl6a	3.14977e-16			oaz1a	2.0561e-18
	srrm4	2.13576e-07			kmt5aa	4.56187e-16			cxcr4a	4.41695e-18
	cnbpb	3.1267e-07			khsrp	5.26723e-16			nptna	4.47626e-18
	rnd1b	4.33011e-07			ewsr1a	9.49671e-16			hpca	1.45237e-17
	slc32a1	5.59767e-07			sesn1	1.27209e-15			ncalda	1.88719e-17
	plcxd3	7.84421e-07			ppp1r14ba	1.34516e-15			ap1s1	1.95454e-17
	egr4	1.01218e-06			pim3	1.57249e-15			CR936442.1	2.89302e-17
	fndc4b	1.21159e-06			med10	1.72946e-15			map1aa	7.46574e-17
	msi2a	1.22059e-06			atf7ip	5.7723e-15			zgc:195170	9.3094e-17
	necab1	1.67165e-06			rgmb	8.94823e-15			ldb2a	2.12676e-16
	tmem178b	1.67808e-06			nanos1	1.55476e-14			samd11	2.68591e-16
	si:ch211-160e1.5	1.69835e-06			hnrnpa1a	1.66927e-14			cpne2	7.46802e-16
	bcl2b	6.93693e-06			tle2a	1.77561e-14			ywhaqb	1.02367e-15
	plk2b	6.94339e-06			zswim5	2.28762e-14			sv2bb	2.02267e-15
	akt1s1	8.27691e-06			rad21a	2.48409e-14			mab21l2	2.49375e-15
	IGLON5	8.59508e-06			BX957317.1	3.16076e-14			cyth1b	2.52218e-15
	ier2a	1.21794e-05			pak2b	4.15671e-14			si:ch211-215d8.2	2.68173e-15
	NPAS3	1.74759e-05			mta2	5.70778e-14			si:dkey-174m14.3	9.73103e-15
	purba	1.9246e-05			si:ch73-46j18.5	6.14595e-14			pik3ip1	1.31058e-14
	sertad4	2.19138e-05			cdkn2aipnl	6.19277e-14			stmn4l	1.31695e-14
	pcmtd1	2.3968e-05			stap2a	8.77853e-14			arhgef1a	2.97363e-14
	rcan3	2.60572e-05			casp3a	1.05794e-13			gdpd5b	5.97407e-14
	psd3l	3.03538e-05			trib3	1.41469e-13			ndrg3b	7.25282e-14
	qkia	3.94619e-05			snrpc	1.88518e-13			rprml	9.0502e-14
	camk1db	4.76257e-05			tcf7l2	3.82436e-13			ric8a	2.8132e-13
	pcdh11	5.52045e-05			u2af1	4.36967e-13			nrxn1a	3.14653e-13
	si:ch211-137a8.4	6.74639e-05			sarnp	4.42882e-13			shisa9a	4.37344e-13
	si:dkey-156n14.5	8.88897e-05			hnrnpc	8.90873e-13			lhx9	5.35088e-13
	BX470182.1	9.80353e-05			npm1a	1.24292e-12			epha4a	7.33234e-13
	raly	0.000228343			zfhx4	1.31597e-12			rergla	8.57615e-13
	sox11b	0.000241052			fbxl6	1.33648e-12			nrp2a	9.77526e-13
	syt5b	0.000255652			nme3	4.84307e-12			galnt18b	1.3316e-12
	cntfr	0.000301786			parp1	5.14024e-12			2021-09-06	2.00627e-12
	celf4	0.000310662			si:dkeyp-123h10.2	1.25948e-11			ahcyl1	2.60841e-12
	gchfr	0.000365711			smarca4a	1.65206e-11			fam168a	2.79036e-12
	pank2	0.000419461			foxo3b	2.5484e-11			gskip	3.58148e-12
	rcan1a	0.000446585			psmb2	4.00973e-11			ccka	8.27671e-12
	ctdspl2b	0.000458283			taf15	4.77979e-11			ppp3r1b	9.03496e-12
	cadm3	0.000473479			apc	5.70644e-11			psd3l	9.8389e-12
	rab6bb	0.000658407			ldb2a	6.46944e-11			dgkaa	2.45766e-11
	FAM19A3	0.000682335			rybpa	3.9982e-10			anp32e	2.56985e-11
	mt2	0.000871133			ssbp4	5.20982e-10			syt2a	4.28376e-11
	opcml	0.00105082			rnd3a	6.22205e-10			BX569787.1	4.41046e-11
	kctd4	0.00176608			ube2d4	8.75882e-10			ppp3ca	4.98975e-11
	fam19a5a	0.00218558			zic2a	3.14091e-09			sptan1	5.35411e-11
	efhd1	0.0023028			si:ch211-260e23.9	1.13499e-08			efna1a	7.25348e-11
	rab6ba	0.00251615			nop56	1.71371e-08			dbn1	8.66373e-11
	her4.2	0.00326401			aars	5.62934e-08			chn1	1.00521e-10
	iscub	0.00333586			robo2	2.29844e-07			fam32a	1.5231e-10
	pkib	0.00362627			zgc:109934	1.00115e-06			tshz1	1.54263e-10
	cd9a	0.00374263			sox11b	2.83241e-06			sh3gl2a	1.57196e-10
	apln	0.00448246			lmo4b	4.97138e-06			RASSF5	1.59764e-10
	tpst1l	0.00454141			atf3	5.12754e-05			2021-09-15	1.83049e-10
	nup93	0.00457456			tspan18b	0.000858534			sin3ab	1.87366e-10
30-23	rprml	0		16-36	tbr1b	0			zfhx3	2.22341e-10
	syt5b	0			otpb	0			opcml	3.27679e-10
	kctd4	0			otpa	0			c1qtnf4	3.29748e-10
	nrgna	0			fezf1	3.71422e-267			calcrla	3.48007e-10
	cpne2	0			six6b	8.72472e-181			zgc:122979	5.03922e-10
	cntln	0			scg2b	5.22463e-153			sept9b	5.6827e-10
	hsbp1a	6.53331e-291			trh	1.01727e-141			CU468917.1	7.18801e-10
	ncalda	7.22757e-248			cbln1	1.18076e-127			arpp21	7.73432e-10
	rgs5b	1.03942e-245			scgn	1.68691e-88			pcdh1b	1.23794e-09
	prkcbb	2.2649e-245			bdnf	1.28875e-87			si:ch211-242e8.1	1.30963e-09
	ndrg3b	7.24515e-237			cpne2	1.37279e-79			si:ch211-153l6.6	1.36301e-09
	FP085414.1	9.07116e-237			FP085414.1	8.69004e-78			atp1a1a.1	1.4581e-09
	gadd45bb	6.96462e-233			vat1	7.21994e-77			ptprua	1.4834e-09
	si:ch211-203b8.6	3.85356e-230			mao	7.24607e-71			btg1	2.05478e-09
	si:ch73-305o9.3	6.9407e-226			pcbd1	5.0444e-69			ndrg4	3.86466e-09
	grm5a	4.914e-224			foxg1a	8.20396e-69			rtn4rl2a	6.59976e-09
	iqsec2b	1.07917e-220			rasd1	3.81609e-66			nab1a	8.43883e-09
	pvalb7	5.51972e-219			pam	7.852e-66			khdrbs1b	1.18621e-08
	camk2a	7.82484e-218			zic2a	2.3984e-64			rcor2	1.22689e-08
	psd3l	6.73849e-204			rgs5b	4.67474e-63			smu1b	1.41929e-08
	si:dkey-1h6.8	1.55429e-199			ddx5	1.24094e-62			FAM19A3	1.78055e-08
	nr2f2	6.76563e-193			ngb	3.64692e-62			fgf13a	2.16753e-08
	si:dkey-35i13.1	2.18786e-187			adcyap1b	4.05142e-60			zc4h2	3.25529e-08
	bnc2	1.24674e-183			ywhaz	1.41648e-54			fam19a5a	3.28172e-08
	add3b	2.23242e-172			kctd4	1.91923e-54			tox3	3.36511e-08
	efhd1	2.50564e-167			islr2	9.85007e-54			zgc:91818	4.06953e-08
	si:ch211-168d1.3	5.47436e-167			gap43	1.35493e-53			nptnb	4.17114e-08
	ngef	5.47766e-161			plk2b	2.43126e-50			pkig	5.25084e-08
	MPRIP	6.07819e-146			kctd12.1	4.43574e-50			fam43b	6.12768e-08
	zgc:64022	5.95711e-145			crhbp	4.85414e-49			arl4d	6.30858e-08
	fezf1	1.42155e-143			kctd12.2	9.10078e-48			cbx7a	6.43824e-08
	ccdc136b	2.92902e-140			rtn4rl2a	1.52097e-47			grin2ab	9.90556e-08
	kctd12.2	1.89088e-138			nr4a1	4.57823e-47			pisd	1.27793e-07
	map2k1	1.26754e-135			ncaldb	2.54741e-46			mta1	1.62504e-07
	raver2	5.6956e-133			fosb	7.82985e-45			ntrk3a	1.65445e-07
	sept5a	1.49166e-131			nrn1a	2.04984e-44			mapk14b	1.94903e-07
	si:ch211-215d8.2	5.89675e-131			crabp1a	4.65443e-44			sdcbp2	2.58979e-07
	rasd1	2.29245e-127			slc35g2a	8.26829e-44			fam20b	3.79733e-07
	rasd3	4.39576e-127			xbp1	5.57344e-43			dtnbp1b	5.01394e-07
	egr3	4.90274e-126			slc17a6b	3.28589e-41			zgc:113208	5.36812e-07
	si:dkey-172j4.3	6.80733e-121			fosl2	3.34514e-39			onecut1	5.40944e-07
	arhgef1a	8.10888e-120			ets2	3.79369e-39			hagh	5.41685e-07
	kcnf1b	1.94742e-114			syt5b	1.27736e-38			efnb2a	7.51985e-07
	islr2	1.45592e-111			insm1b	2.34337e-37			purba	9.29342e-07
	scg2b	1.90225e-111			fam46ba	4.19221e-37			gadd45bb	9.52475e-07
	tmsb1	3.54054e-111			ptp4a3	1.35414e-35			fam131bb	1.03759e-06
	alcamb	9.9423e-111			junba	2.79522e-35			mbnl2	1.09841e-06
	BX569787.1	1.72766e-109			nucb2b	1.64654e-34			prdx5	1.27391e-06
	palmdb	4.0445e-108			necab1	3.56452e-34			kctd12.1	1.2763e-06
	junba	4.66015e-108			nhlh2	1.25092e-33			mef2aa	1.31329e-06
	rdh12	1.52942e-106			efnb3b	2.49823e-31			mif	1.60987e-06
	ngb	2.01525e-106			cd164	1.07653e-30			sema6e	2.21458e-06
	ppp1r1c	2.65946e-105			arpp21	2.08168e-30			vsnl1a	2.53606e-06
	zgc:114118	1.46947e-101			plscr3b	2.13581e-30			si:ch211-168f7.5	2.57772e-06
	camk1db	1.42187e-99			fxyd6	4.84322e-30			srsf2a	3.03509e-06
	si:dkey-112a7.4	5.63563e-96			pag1	5.69554e-30			cdipt	3.42761e-06
	shox2	6.74089e-93			tspan18a	9.26002e-30			rbfox3a	3.58853e-06
	gabra4	2.41309e-92			gch1	1.58699e-29			lancl1	3.96146e-06
	CABZ01041913.1	1.61471e-90			uchl1	5.21091e-29			tbkbp1	6.16776e-06
	cyth1b	3.24817e-90			ptprna	2.35494e-28			mylipa	6.2609e-06
	celf2	1.48581e-88			npas4a	4.12842e-28			CR847531.1	6.579e-06
	rergla	2.00945e-88			plcxd3	1.68523e-27			ISCU (1 of many)	7.76283e-06
	pdyn	3.08421e-87			higd1a	5.93342e-27			gabrb2	8.27528e-06
	cbx7a	6.78874e-87			gpx3	2.75497e-26			si:ch211-63p21.1	8.61713e-06
	si:dkey-174m14.3	2.49027e-84			sik1	2.95534e-26			rheb	1.09924e-05
	sulf2b	2.52747e-82			arhgdia	1.20423e-25			tpma	1.16939e-05
	ap1s1	5.28185e-80			rergla	1.31657e-25			prkab1b	1.64138e-05
	gng13b	9.27822e-78			zfhx4	3.44466e-25			acvr2aa	1.90731e-05
	ncaldb	1.53532e-75			sat1a.2	4.74506e-25			arrb2b	2.04395e-05
	arpp21	4.48731e-75			si:ch211-202a12.4	6.7649e-25			skia	2.20665e-05
	fign	5.44599e-75			trib3	1.11928e-24			camk2d2	3.0852e-05
	prkab1b	9.78247e-75			phlda2	4.45429e-24			cnksr2b	3.29741e-05
	chst2b	2.70958e-71			atp1b1a	7.05214e-24			rtn3	3.94881e-05
	rhoab	1.32725e-70			tmsb1	4.35791e-23			cxxc5a	4.14218e-05
	plk2b	2.02136e-68			tmsb	7.31701e-23			histh1l	4.20466e-05
	camk4	3.0446e-68			rtn4r	1.10376e-22			tuba8l2	4.49335e-05
	mfge8b	8.23131e-67			tcea2	1.26539e-22			edil3a	4.88372e-05
	atp2b2	1.10372e-66			adcyap1r1a	1.44291e-22			hmgb2b	5.38007e-05
	r3hdm1	1.12786e-65			mcl1a	2.38209e-22			negr1	5.70682e-05
	tpma	1.93795e-63			jun	3.85686e-22			fign	5.89565e-05
	rgs16	1.77141e-60			syt4	2.16341e-21			rpp21	6.7552e-05
	CU468917.1	3.04539e-60			pcsk1nl	2.54866e-21			abhd17b	7.04849e-05
	calm1b	9.31489e-60			lhx5	1.9519e-20			arl1	8.29627e-05
	gria2b	1.05595e-59			rrad	1.99427e-20			si:ch73-46j18.5	8.3065e-05
	camk2n1a	2.81742e-59			rcan1a	3.1772e-20			itm2cb	8.86852e-05
	si:ch211-153l6.6	3.5391e-59			adgrb1b	4.12032e-20			fkbp1b	9.38073e-05
	gdpd5b	9.50231e-58			sst1.1	5.17681e-20			smdt1b	0.00011082
	kctd12.1	9.66504e-58			mycbp	6.82812e-20			ggctb	0.000111569
	bdnf	2.4165e-56			sdc4	1.28554e-19			capns1a	0.000136761
	onecut1	4.92738e-56			qdpra	1.71406e-19			pde4ba	0.000157472
	ncs1b	4.99388e-56			si:ch211-213a13.1	2.48778e-19			eef1b2	0.000172475
	mapk1	3.3298e-55			CABZ01079011.1	5.62937e-19			pcdh7b	0.000187939
	camk2b1	9.62425e-54			manf	1.25575e-17			eif5	0.000197518
	adcyap1r1a	3.5276e-53			dclk1b	3.4867e-17			efhd1	0.000218371
	serpini1	4.87286e-53			jund	3.63887e-17			cadm3	0.000243736
	trim9	9.17982e-53			plk3	7.52728e-17			tnrc18	0.000251252
	cdipt	1.06865e-52			junbb	1.772e-16			ssbp4	0.000269581
	cdk5r2a	1.96646e-52			chga	2.28773e-16			prdx2	0.000316294
	cebpd	3.07655e-51			pdia6	3.77334e-16			dynll2a	0.000331041
	fam49al	5.75931e-51			glipr1b	2.48362e-15			ctdsp2	0.000342663
	grin2bb	2.77803e-50			zfhx3	4.69038e-15			cntnap2a	0.000346862
	fndc4b	2.39498e-49			zgc:101840	1.34617e-14			daam1a	0.000406315
	mtbl	2.58852e-49			chst2b	3.03956e-14			necab1	0.000456176
	rasgef1ba	2.69033e-49			bhlhe41	1.81593e-13			tp53i11b	0.000494919
	sstr1a	4.34739e-49			rgma	8.72664e-11			mef2d	0.000504393
	nptna	4.56981e-49			ier2a	1.53895e-10			kctd1	0.000542393
	kctd15a	5.98046e-49			itm2cb	5.61125e-10			acvr1ba	0.00061785
	homer1b	1.44595e-48			sstr1a	5.85509e-10			lmbrd1	0.000625963
	RASSF5	1.66645e-48			h1fx	2.54507e-09			rbb4l	0.000676703
	hivep1	1.90157e-48			tubb5	4.1021e-07			slmapb	0.000753014
	her6	2.00784e-48			jdp2b	4.57207e-06			gria1a	0.000841676
	phyhipla	4.86091e-48			ebf3a	0.000336521			desi1a	0.000912159
	gas7a	6.52547e-48			cox8b	0.337018			arhgef4	0.000916495
	ywhaqb	5.41735e-47		44532	tal1	2.83473e-191			enox2	0.00105916
	arhgef4	3.2701e-46			gata3	2.3254e-157			arl6ip5b	0.00108556
	phlda2	1.64469e-45			six3a	2.19863e-73			asap1b	0.00111095
	ppp3ca	5.36069e-45			emx2	6.70066e-62			cd9a	0.00113985
	ppp3cb	2.37606e-44			tcf7l2	6.64733e-52			sipa1l1	0.00116622
	fam49bb	3.96528e-44			gata2a	2.64904e-50			trim13	0.00125119
	gskip	4.06218e-44			six3b	1.29744e-47			rab40b	0.00125571
	si:dkey-19b23.8	4.40498e-44			gad2	1.77547e-47			dnajb1b	0.00133122
	ccka	5.93268e-44			nxph1	8.21607e-45			pik3r3a	0.00134298
	pi4k2b	1.65506e-43			si:dkey-175g6.2	2.38761e-37			arrdc3b	0.00146576
	anks1b	5.79905e-43			nkx2.2a	6.88208e-37			psmd11b	0.00146625
	spock3	9.51791e-43			foxp4	3.99142e-32			amer2	0.00154613
	pik3ip1	4.14637e-41			tmsb2	3.40985e-30			peli3	0.00160957
	tob1a	3.48781e-40			stmn2b	4.66888e-28			mob1bb	0.00166895
	syngap1b	5.49329e-39			sox14	7.5844e-28			sgce	0.00168239
	mras	6.96397e-39			otx1	5.01112e-26			ndufb11	0.00178633
	vat1	1.34046e-38			islr2	6.23413e-25			cptp	0.00183335
	h1fx	2.81795e-38			gap43	1.01152e-24			srebf2	0.00189421
	ppp3r1b	1.09701e-37			fabp3	1.1798e-24			nucb2a	0.00189969
	nfia	3.42574e-37			tubb5	5.29825e-23			micu3a	0.00193917
	tfap2a	3.98372e-37			zic3	2.34992e-22			phactr3b	0.00206173
	mef2cb	4.06056e-37			maptb	3.54678e-19			tmem240b	0.00208203
	sin3ab	4.29267e-37			grm2b	3.80798e-18			camk2g1	0.00246873
	sh3bp5la	1.08138e-36			mllt11	8.0413e-18			kctd5a	0.00266461
	camk2d1	2.53883e-36			atp1b1a	1.5806e-17			h1fx	0.00283719
	pam	4.27198e-36			ywhaz	1.74283e-16			fam49bb	0.00289387
	rasd4	1.02337e-35			pknox2	3.32557e-16			CT027638.1	0.00298849
	chga	1.403e-34			zfpm2a	2.21045e-15			calr3a	0.00335463
	zgc:92249	2.06846e-34			lmo1	3.7976e-15			nptx1l	0.00386155
	rnd2	5.35359e-34			slc32a1	1.63573e-14			ccng2	0.00421422
	fosl2	1.1501e-33			cdh4	3.06526e-14		27-54	hoxb5a	4.58781e-44
	cd164	1.96058e-33			plcxd3	3.761e-14			hoxb5b	4.11391e-41
	kctd7	2.99043e-33			plk2b	1.61854e-13			snap25a	9.67927e-40
	mycbp	7.41121e-33			BX465834.1	3.86042e-13			mab21l2	9.57347e-30
	hist2h2l	1.22253e-32			arg2	4.03897e-13			rbfox1	1.01088e-23
	boka	7.54785e-32			dpysl4	1.09831e-12			si:dkey-7j14.5	1.66325e-18
	mbnl2	1.27627e-31			apba2b	8.64322e-12			mibp2	4.24796e-15
	syngr3b	4.6298e-31			hspa5	9.14071e-12			IGLON5	1.09379e-14
	capns1b	1.00296e-30			zgc:153426	1.53368e-11			rbfox3a	2.59937e-14
	tulp4b	1.04117e-30			cotl1	1.67949e-11			hoxb6a	1.2389e-13
	mink1	1.2855e-29			slc35g2a	2.12523e-11			hoxc5a	3.13508e-13
	glipr1b	1.92016e-29			cd99l2	6.58937e-11			tmsb2	2.69281e-12
	gabrb3	6.48165e-29			uchl1	9.93069e-11			gng2	4.36634e-12
	rrad	8.45415e-29			vat1	2.33722e-10			oip5-as1	5.9129e-12
	mef2aa	2.77542e-28			FP085414.1	3.97658e-10			vamp1	6.19903e-12
	slitrk4	3.17115e-28			pcp4a	5.52383e-10			si:dkey-56f14.4	6.605e-12
	prickle2a	6.00357e-28			syt5b	6.73242e-10			mab21l1	2.02544e-11
	bhlhe41	6.52436e-28			tuba1a	7.30323e-10			hoxb6b	2.69424e-11
	pyya	9.73803e-28			myrip	7.57309e-10			fabp3	5.8692e-11
	tnfaip2a	1.58783e-27			nr4a1	7.74352e-10			ier2b	4.76294e-10
	tbkbp1	2.01405e-27			rpp25b	8.98386e-10			nsg2	5.9774e-10
	tox	2.73045e-27			klf7b	9.38576e-10			c1qtnf4	1.10834e-09
	si:ch211-160e1.5	7.99496e-27			si:dkey-56m19.5	2.28812e-09			aldocb	1.39611e-09
	pag1	8.58391e-27			higd1a	2.68955e-09			cplx2l	2.92323e-09
	syt9b	2.80934e-26			vgf	3.49984e-09			stx1b	3.96586e-09
	si:dkey-205h13.1	6.77402e-26			gria1a	9.84471e-09			syn2a	6.08277e-09
	plppr3b	1.45101e-25			tmsb	1.1943e-08			sncb	1.29926e-08
	zgc:152863	1.53674e-25			rnd3a	1.43972e-08			slc32a1	2.83607e-08
	smdt1a	2.29053e-25			tmem178b	1.65251e-08			pvalb6	5.24607e-08
	prmt8b	3.75145e-25			hnrnpa0a	1.71582e-08			hpca	5.467e-08
	phf20b	4.06689e-25			kidins220b	1.73918e-08			clta	6.04783e-08
	fosb	5.30886e-25			tdh	1.85077e-08			fndc4b	6.05778e-08
	gpr63	6.38808e-25			her15.1	4.53589e-08			gad1b	8.81366e-08
	asphd2	6.56884e-25			sh3bp5la	1.00469e-07			gadd45ba	9.64153e-08
	tpst1	9.00279e-25			mfsd2ab	1.47902e-07			ndufa4	1.63497e-07
	PCP4L1	1.71415e-24			alcama	2.82333e-07			kcnip1b	2.71794e-07
	cacng8a	3.25062e-24			dusp5	9.22762e-07			ppp3cb	3.24189e-07
	robo1	4.80983e-24			fosl2	9.63143e-07			robo2	4.01774e-07
	si:ch211-157b11.12	6.008e-24			pbx1a	1.56274e-06			atp2b2	4.30628e-07
	fam19a5a	1.1735e-23			dusp2	2.97464e-06			dap1b	4.38264e-07
	SMIM30	1.17449e-23			adgrb1a	3.79738e-06			vdac2	4.71037e-07
	arrb2b	1.2137e-23			qkia	6.62963e-06			calm1b	4.90483e-07
	rap1b	3.17563e-23			her15.2	3.51854e-05			zfhx4	5.78062e-07
	fkbp1b	8.58247e-23			zic2a	0.00218326			zic1	8.3975e-07
	tmem30ab	1.19241e-22		44266	elavl3	2.1927e-92			eif4ebp1	8.86284e-07
	arhgef9b	1.21626e-22			elavl4	8.78173e-92			ncl	9.15399e-07
	dynll2a	2.39067e-22			slc6a1b	5.32802e-89			rpz2	9.45653e-07
	fis1	2.55948e-22			tfap2b	2.22977e-64			hoxa3a	1.12201e-06
	adcyap1b	4.07401e-22			nxph1	9.71197e-64			zgc:194981	1.16163e-06
	purba	5.70817e-22			lhx1a	1.40594e-62			cd81a	1.38672e-06
	zgc:92818	5.72739e-22			pbx3b	7.13025e-55			pim1	1.47195e-06
	ric8a	8.73324e-22			stmn4	7.48512e-53			elavl4	1.53281e-06
	map1lc3a	1.34875e-21			hmgb1b	5.85054e-52			map1ab	1.54263e-06
	nexmifb	1.43273e-21			foxp4	4.05271e-50			FAM19A3	1.63043e-06
	hnrnpa3	3.4133e-21			gata3	3.16646e-40			atp6v1e1b	2.19257e-06
	usp2a	3.94722e-21			zfpm2b	3.37575e-40			nptna	2.51137e-06
	syt11a	4.58098e-21			gata2a	3.12643e-39			egr4	2.58898e-06
	mef2d	6.41124e-21			tmeff1b	3.6995e-36			fam84a	2.95621e-06
	tmem9	7.03909e-21			zfhx4	6.73458e-35			atp6v1g1	3.20043e-06
	eml2	8.52686e-21			sox11a	5.46513e-34			sncgb	3.6515e-06
	rgs20	1.35479e-20			zfhx3	1.54583e-33			ebf3a	3.75501e-06
	arl2bp	1.74132e-20			ndnf	1.98521e-33			btg2	3.92438e-06
	igfbp5b	2.71831e-20			nsg2	3.3217e-33			tpi1b	4.97518e-06
	pdcd10b	3.03449e-20			hmgb1a	2.45773e-31			si:ch211-151p13.8	5.00165e-06
	ahcyl1	4.27816e-20			ctnnb1	6.04664e-31			gad2	5.10422e-06
	rheb	6.67732e-20			msi2b	9.55194e-31			eno1a	6.1046e-06
	fam107b	8.20613e-20			ctbp2a	5.79561e-30			gchfr	7.98171e-06
	tmem240b	8.95682e-20			hmgb2b	1.50129e-29			tubb2b	8.18784e-06
	prkar2aa	9.64549e-20			tubb5	8.1357e-29			gas7a	8.62442e-06
	dnajb4	1.31105e-19			si:dkey-56m19.5	9.53866e-28			pygmb	1.15157e-05
	ctsf	1.35975e-19			nxph2b	2.58289e-27			hoxb8a	1.20742e-05
	pdk2a	1.65166e-19			dmbx1a	2.21525e-26			celf4	1.23577e-05
	junbb	1.75442e-19			cd99l2	6.74252e-26			nxph1	1.27119e-05
	plekhb2	2.28256e-19			tpt1	6.96947e-26			mycb	1.43285e-05
	egr1	2.32439e-19			tuba1a	2.63119e-23			rpl12	1.50386e-05
	map1aa	5.01334e-19			ebf3a	3.91576e-22			smu1b	1.56242e-05
	gadd45ba	6.65211e-19			gap43	1.2354e-21			cbln1	1.61712e-05
	mtus1b	7.61448e-19			sp5a	3.08933e-21			uncx	1.85325e-05
	ak1	9.47655e-19			sumo3a	7.14639e-21			id2a	2.38058e-05
	spryd7b	1.49801e-18			dnajb1b	7.68387e-21			nptx1l	2.51865e-05
	opcml	1.51003e-18			tefa	1.69694e-20			kcnc1a	3.1619e-05
	cdh4	3.04412e-18			marcksl1a	3.0128e-20			rps15	3.23343e-05
	iscub	4.13422e-18			lhx5	6.83287e-20			tmem178b	3.41815e-05
	qdpra	1.37626e-17			cirbpb	7.07554e-20			FP085414.1	3.56424e-05
	npas4a	1.4165e-17			chd4a	7.65337e-20			gbx1	3.91165e-05
	sptan1	3.57819e-17			calb2b	1.00491e-19			rpl10a	4.21657e-05
	anapc16	3.87711e-17			zeb2b	6.29316e-19			atp6ap2	4.2684e-05
	CR388369.1	3.88924e-17			rpl23a	8.64644e-19			atp6v0b	4.70123e-05
	apoob	1.1206e-16			ccni	1.13219e-18			CU468917.1	4.73677e-05
	nr4a1	1.84749e-16			stmn2b	2.07538e-18			ldha	5.31908e-05
	dbpb	2.7199e-16			si:ch211-288g17.3	2.13009e-18			cntnap2a	5.3617e-05
	adgrb1b	3.36521e-16			sinhcafl	2.25709e-18			dnajc5aa	5.43448e-05
	vsnl1a	3.46064e-16			ppiaa	4.77019e-18			atp1b1b	5.52856e-05
	vps35	3.63922e-16			cadm3	6.10469e-18			junba	6.534e-05
	spred1	3.86609e-16			qkia	1.21257e-17			si:ch211-137a8.4	6.60937e-05
	hsph1	5.47058e-16			robo2	1.23623e-17			eif4a2	7.17422e-05
	kidins220b	5.82645e-16			rps14	2.09285e-17			camk1db	8.48827e-05
	btbd6a	1.23284e-15			rack1	2.43405e-17			NPAS3	8.53648e-05
	mif	8.65006e-15			scrt1a	2.48195e-17			dynll2a	8.64966e-05
	pcsk1nl	1.05744e-14			nme2b.1	6.18248e-17			rpl21	8.83004e-05
	anxa11b	1.19846e-14			sox11b	8.37213e-17			junbb	9.3141e-05
	ptprk	4.33599e-14			rps25	9.5118e-17			eno2	9.72841e-05
	chka	2.18172e-13			rpl17	2.56669e-16			rps3a	0.000103041
	cadm1b	1.51274e-12			rpl21	3.77785e-16			tspan18a	0.000104781
	jdp2b	2.0223e-12			pvalb6	3.87086e-16			prmt1	0.000108576
	stmn1a	2.16977e-12			ube2e2	4.58861e-16			zgc:100920	0.00011091
	slc35g2a	3.66559e-12			uncx	4.89127e-16			raraa	0.000138435
	itm2cb	2.26888e-09			zgc:114188	8.61673e-16			myt1b	0.000143704
					hmga1a	8.91211e-16			nr2f1a	0.00014662
					rpl9	1.45399e-15			ndufa5	0.000164563
					slc25a55a	1.47963e-15			sh3gl2a	0.000165766
					rps17	1.73479e-15			tubb2	0.000177583
					zc4h2	3.00926e-15			nrgna	0.000190233
					lhfpl3	3.50138e-15			nanos1	0.000192642
					ywhah	3.8506e-15			si:dkey-33c12.3	0.00019585
					rpl12	4.14256e-15			eif5	0.00020042
					zbtb20	4.60264e-15			zgc:162989	0.000203768
					rps3a	6.24878e-15			rab6bb	0.000204491
					hpca	6.86697e-15			pou2f2a	0.000212804
					dynll2b	7.45698e-15			slc6a1a	0.0002197
					pcdh11	8.72603e-15			CABZ01079011.1	0.000226567
					si:dkeyp-123h10.2	1.24789e-14			gnao1b	0.000233884
					en2b	1.48415e-14			rps27a	0.000236028
					marcksa	1.54491e-14			pou3f1	0.000251411
					si:ch211-133n4.4	4.81814e-14			si:ch211-191j22.3	0.000256853
					impdh1b	5.02906e-14			map1aa	0.000268192
					khdrbs2	7.16916e-14			pax2a	0.000269505
					rps8a	1.26837e-13			gpia	0.000269731
					h2afva	1.92273e-13			atp5meb	0.000286423
					rpl26	2.52137e-13			fundc1	0.000296132
					rpl10	2.60359e-13			cadm1b	0.000307022
					insm1a	3.51123e-13			aldoaa	0.000308308
					rpl22	4.17402e-13			chrna5	0.000310563
					ldb1a	4.55188e-13			kctd4	0.000315234
					rpl10a	5.01738e-13			cbx1b	0.000318333
					eef1g	7.68743e-13			atp6v0cb	0.000329903
					otx2b	8.79621e-13			zgc:162707	0.000337378
					sesn1	9.24699e-13			ndufb5	0.000337479
					rpl24	1.34197e-12			cbx7a	0.000412615
					SYNPR	1.75881e-12			opcml	0.000439574
					rps23	1.85599e-12			plcxd3	0.000443773
					smarcb1b	1.86722e-12			pcdh7a	0.000463395
					slc6a1a	1.86793e-12			palm1b	0.000490615
					nfil3	2.1568e-12			romo1	0.000522948
					rps27a	2.37586e-12			eif3g	0.000530184
					ran	2.85609e-12			uqcr10	0.00058521
					tcea1	3.03829e-12			plppr3b	0.000598891
					ctnnbip1	3.39165e-12			glra1	0.000614293
					lin7b	4.51229e-12			uchl5	0.000621826
					zgc:100920	5.21628e-12			pdcl	0.000657812
					hp1bp3	6.38662e-12			tgif1	0.000700661
					polr2d	6.50755e-12			camk2g1	0.000718193
					rps26l	6.68474e-12			rpl5b	0.000732746
					tle2a	8.94321e-12			pfkpa	0.000762226
					btf3	1.06899e-11			cbln2b	0.000777316
					csdc2a	1.10318e-11			bhlhe22	0.000842144
					rgma	1.28971e-11			sertad4	0.000872687
					tmsb	1.40253e-11			epdr1	0.000877018
					rpl22l1	1.85723e-11			chn1	0.000877691
					uba52	2.35387e-11			ran	0.000924356
					rps11	2.76434e-11			rab11bb	0.000994723
					gchfr	3.05856e-11			lhx9	0.00102534
					rcc2	3.59358e-11			timm23a	0.00104527
					eef2b	4.41753e-11			cpe	0.00105773
					calb2a	4.53149e-11			tox3	0.00108705
					eif3m	4.77089e-11			stmn3	0.00111179
					si:ch211-195b15.8	9.50788e-11			btf3	0.00117187
					crabp1a	1.56408e-10			ckmt1	0.00119415
					cdkn1bb	1.82017e-10			ctbp2a	0.00119906
					srgap3	2.01191e-10			gmfb	0.00122504
					vma21	2.08614e-10			pbxip1a	0.00130467
					lef1	2.51935e-10			amph	0.00145407
					sh3bgrl2	3.35596e-10			tob1a	0.0015147
					pik3r3a	3.65578e-10			glrbb	0.00160204
					rps10	4.07094e-10			hspa9	0.00172381
					rpl31	4.65923e-10			nsfa	0.00172429
					pbx1a	4.80647e-10			myca	0.0017676
					id4	5.48546e-10			fkbp3	0.00190019
					cct8	6.89301e-10			vav3b	0.00191901
					si:dkey-56f14.7	7.17426e-10			c1qbp	0.00206191
					pacsin1b	8.8282e-10			pabpc1b	0.0020813
					mid1ip1b	1.27706e-09			aplp2	0.00210921
					nkd1	1.84681e-09			rasd4	0.00213829
					nfil3-5	2.51201e-09			rnd3a	0.00217043
					si:dkeyp-75h12.5	2.62861e-09			ywhag1	0.00219836
					chchd10	2.75109e-09			ier5	0.00225091
					uchl1	3.57026e-09			zgc:122979	0.0022765
					grin1b	3.71465e-09			h1fx	0.00244607
					coro1b	4.36526e-09			tsc22d3	0.00247246
					fscn1a	4.64927e-09			si:dkeyp-69c1.7	0.00250201
					rpl14	5.39893e-09			cadm3	0.00250286
					eef1b2	6.08219e-09			eef1a1b	0.00260715
					rgmb	7.33904e-09			prdx5	0.00262895
					myt1b	8.07752e-09			mknk2b	0.00263694
					slc16a9b	8.68286e-09			tufm	0.00286123
					rbbp4	9.17103e-09			histh1l	0.00288106
					si:ch211-260e23.9	9.45628e-09			yipf4	0.00288433
					islr2	9.84777e-09			pknox2	0.00302384
					zswim5	1.05116e-08			timm10	0.00310453
					tuba2	1.06974e-08			arl1	0.00318909
					mfsd2ab	1.1199e-08			stxbp1a	0.00322244
					myl6	1.19007e-08			lmo1	0.00333943
					rpl6	1.29211e-08			ldhba	0.00339923
					edil3a	1.43532e-08			ppp6c	0.00370826
					calr	1.45229e-08			marcksl1a	0.00377369
					cacng8b	1.50248e-08			zgc:109934	0.00380812
					tmem178b	1.77979e-08			vsnl1a	0.00393752
					cnp	2.68971e-08			uqcrq	0.00405184
					adh5	2.73947e-08			rps23	0.00422594
					si:ch211-151p13.8	3.04116e-08			syngr3a	0.00430272
					cbx3b	3.13985e-08			atp1a1a.1	0.0045378
					eif2s3	3.14502e-08			slc6a1b	0.0045549
					dpysl3	3.55095e-08			islr2	0.00457679
					ilf2	4.06293e-08			cldnd1a	0.0047426
					tomm40l	4.17516e-08			syt12	0.0048056
					ptenb	4.42708e-08			scrn3	0.00481257
					si:dkey-42i9.4	8.3501e-08			rgs7bpa	0.00488834
					cct7	8.74396e-08		20-41	prph	8.86543e-164
					atp2b3a	9.12226e-08			slc5a7a	1.62089e-159
					syncrip	1.03329e-07			slc18a3a	1.52913e-143
					cdca4	1.03933e-07			plscr3b	3.5549e-126
					snrpf	1.0574e-07			qkia	1.36507e-108
					cotl1	1.08052e-07			isl1	3.30734e-101
					zgc:112356	1.099e-07			tac1	8.78881e-101
					pcdh7b	1.10511e-07			chata	2.89003e-91
					sox4b	1.33965e-07			neflb	7.43907e-85
					caprin1b	1.82102e-07			slit3	2.15808e-80
					nono	1.90104e-07			cd81a	2.71227e-79
					rcan3	1.99491e-07			anxa13l	6.74904e-79
					si:ch73-46j18.5	2.08837e-07			lhx4	5.15898e-77
					ap1s2	2.17446e-07			nkx6.1	1.14736e-75
					hnrnpr	2.36858e-07			isl2a	1.47943e-69
					psmb1	2.61852e-07			jun	1.7346e-68
					jagn1a	2.7649e-07			tagln3b	1.22073e-66
					pdia3	2.98499e-07			lmo4b	7.46546e-61
					apex1	3.22568e-07			sncga	2.02052e-59
					hspe1	3.69782e-07			calca	1.37622e-56
					auts2a	4.43006e-07			tppp2	1.23491e-47
					stap2a	4.52824e-07			nefmb	2.58879e-44
					actl6a	4.6693e-07			CABZ01072077.1	2.93018e-44
					sarnp	4.81508e-07			islr2	7.03903e-42
					flrt3	5.81112e-07			chodl	9.60409e-42
					tox3	7.60971e-07			aclya	3.73875e-41
					cct3	7.61788e-07			si:dkey-85n7.6	7.15887e-41
					adgrb1a	7.92229e-07			CABZ01112647.1	1.41777e-38
					rnd3a	7.94911e-07			si:ch211-247j9.1	2.06366e-37
					zgc:153018	8.10363e-07			atf3	5.4282e-37
					hmg20a	8.35167e-07			si:ch211-213a13.1	2.9468e-35
					si:dkey-35i13.1	8.39797e-07			smad1	2.9679e-35
					zgc:113208	9.62871e-07			mycb	8.16008e-35
					cbx1a	1.02082e-06			nefma	8.69239e-35
					pbx4	1.36621e-06			ache	1.7418e-34
					sec61a1	1.4637e-06			mfge8b	1.81133e-34
					maptb	1.54836e-06			tbx2b	1.16283e-32
					pou3f3b	1.56531e-06			stmn4l	3.3856e-31
					tmem255a	1.64501e-06			tbx3a	9.6612e-31
					rybpa	1.66316e-06			bmp16	1.45365e-30
					dynll2a	1.75446e-06			elavl4	3.26367e-30
					en2a	1.91352e-06			agrn	1.40631e-29
					sf3b5	2.22796e-06			map1lc3b	1.67435e-29
					hspa5	2.42411e-06			si:dkey-7j14.5	2.15422e-29
					ubap2a	2.59205e-06			gsna	3.63159e-29
					scrt2	2.71006e-06			vamp1	6.5034e-28
					slc35g2a	3.22296e-06			snap25b	2.29675e-27
					ccng2	3.38678e-06			sst6	3.58254e-27
					chd4b	3.79378e-06			zgc:175088	7.43865e-26
					nmnat2	4.04263e-06			col19a1	8.48787e-26
					nanos1	4.24466e-06			vip	1.56733e-25
					elmo1	4.80111e-06			anxa13	2.66057e-25
					emx2	5.27789e-06			pvalb6	5.15775e-25
					zgc:101840	5.63971e-06			chga	1.48115e-24
					pafah1b3	5.64313e-06			anxa11b	2.42121e-24
					alyref	6.72826e-06			fndc4b	3.07957e-24
					jam3a	7.02768e-06			sh3pxd2b	3.54024e-24
					CU929259.1	7.96914e-06			txn	8.14738e-24
					timm10	8.12996e-06			cntfr	3.44181e-22
					tdh	8.13721e-06			nog3	4.25882e-22
					znf395a	1.34665e-05			ldhbb	1.96823e-21
					cdc34b	1.51287e-05			bcam	2.22742e-21
					soga1	2.4187e-05			si:ch73-119p20.1	2.23137e-21
					pknox2	3.45584e-05			cbfb	2.66654e-21
					si:dkey-7j14.5	3.71093e-05			itm2cb	2.02971e-20
					ankrd12	4.26575e-05			flot1b	3.23292e-20
					crebzf	4.90868e-05			mvp	3.62339e-20
					foxj3	5.87371e-05			onecut1	1.63597e-19
					nop53	5.92384e-05			si:dkeyp-69c1.7	1.43725e-18
					mapre1b	8.07377e-05			akap12b	1.68391e-18
					tgif1	8.71262e-05			cox6b1	9.49076e-18
					b3galt2	0.000122551			tmeff2b	1.07952e-17
					vsnl1a	0.000123477			cplx2l	1.93037e-17
					pcdh19	0.000131144			edil3a	2.00218e-17
					cct6a	0.000137452			mtbl	2.34194e-17
					ehmt1b	0.000234923			shdb	5.10861e-17
					smarca4a	0.000313363			wu:fc21g02	6.02354e-17
					her15.2	0.000939055			aldocb	1.21995e-16
					sncgb	0.00128526			fth1b	1.3666e-16
					tfap2e	0.0013985			id1	1.72182e-16
					ptgdsb.1	0.00301695			gstr	1.90879e-16
					id2a	0.00444649			vdac2	2.29669e-16
					nptnb	0.00458383			sri	2.43031e-16
				13-24	en2b	7.5567e-107			ccdc92	2.97282e-16
					cpne4a	3.47405e-97			chchd10	5.31213e-16
					pax2a	7.55538e-97			rab6ba	6.98316e-16
					tcf7l2	1.79771e-91			atp1a3b	7.922e-16
					en1b	4.54523e-76			clu	1.35344e-15
					evx2	1.38494e-72			cbx7a	1.65853e-15
					en2a	7.40126e-67			vim	1.92388e-15
					arhgdig	1.91662e-60			dap1b	3.23576e-15
					zic3	6.63377e-59			ndufa4	5.00174e-15
					meis1b	1.39634e-53			sult4a1	1.18081e-14
					meis2b	1.45142e-46			ndrg3a	2.19584e-14
					pou3f1	8.24256e-45			golga7ba	3.37744e-14
					snap25b	6.47995e-41			ret	2.13598e-13
					nr2f2	8.58349e-40			acat2	2.21293e-13
					ebf3a	1.12841e-38			ssuh2rs1	4.14648e-13
					si:dkey-7j14.5	2.29567e-38			alcamb	4.22535e-13
					rab6ba	3.58665e-32			uqcrh	5.48023e-13
					cbln2b	3.79875e-32			tubb2	6.59755e-13
					meis2a	2.59235e-31			socs3b	7.32946e-13
					snap25a	1.93709e-28			b2m	1.00567e-12
					zic2a	4.74824e-27			aldh9a1a.1	1.00628e-12
					slc17a6b	3.83738e-26			anxa3b	1.88336e-12
					eno1a	6.3184e-24			pkma	2.47869e-12
					islr2	9.67779e-23			tspo	3.05556e-12
					hpca	1.1109e-22			atp5mc3b	3.83299e-12
					tubb2b	2.39003e-22			cntn1b	4.08999e-12
					syt1a	5.64469e-21			abhd3	5.69505e-12
					si:ch211-222l21.1	4.21377e-20			cox7a2a	6.31845e-12
					atp6v0cb	2.37934e-19			mrpl54	7.53831e-12
					aldocb	9.21139e-18			pcdh7a	1.39289e-11
					syn2a	1.25255e-17			cbx3b	2.04326e-11
					BX005003.1	1.28557e-17			ppifb	2.66908e-11
					mab21l1	5.36417e-17			got2a	3.96367e-11
					cirbpa	1.26478e-16			rpz5	5.34e-11
					nsg2	1.66038e-16			sv2bb	5.90862e-11
					id2a	3.62108e-16			creg2	7.13879e-11
					rbfox1	5.55681e-16			atp5f1e	9.01782e-11
					elavl4	6.63631e-16			cox6a1	9.57389e-11
					gpia	5.7467e-15			atp2b3b	1.07924e-10
					si:dkeyp-75h12.5	1.11824e-14			lrrtm2	1.19792e-10
					nrxn1a	1.65865e-14			si:ch211-191j22.3	1.33005e-10
					spock3	2.00223e-14			eef2l2	1.46177e-10
					si:dkey-110c1.10	4.11074e-14			sdhdb	1.6034e-10
					atp1b2a	5.79525e-14			atp2b2	1.61139e-10
					rbfox3a	7.26399e-14			phox2a	1.96312e-10
					sox4a	1.32061e-13			ddt	2.26719e-10
					cbln1	2.85987e-13			tusc5a	2.40403e-10
					dynll2a	3.14295e-13			atp5meb	2.58659e-10
					rab6bb	3.86918e-13			zgc:56493	2.83543e-10
					bhlhe40	1.12934e-12			ndufb4	3.16677e-10
					eno2	1.23711e-12			tmie	3.79449e-10
					calm2a	4.2797e-12			ppp1r1c	5.11184e-10
					cox6b1	4.32192e-12			arl6ip1	7.49844e-10
					nr2f1a	5.23803e-12			ndufa7	7.69817e-10
					sypb	7.88456e-12			etfa	8.50753e-10
					syt11a	1.10516e-11			ndufab1b	9.49023e-10
					calm1b	1.53291e-11			psap	1.08375e-09
					desi1a	4.70925e-11			cs	1.12846e-09
					marcksb	5.41573e-11			cst3	1.40023e-09
					zc4h2	6.66899e-11			vdac1	1.48604e-09
					nptna	7.88281e-11			pygmb	1.51872e-09
					scg5	8.13289e-11			eif5a2	1.5608e-09
					glrbb	8.58739e-11			atp1a3a	1.88887e-09
					vamp2	8.78365e-11			slc25a3b	1.99711e-09
					zfhx4	9.98004e-11			NPAS3	2.55067e-09
					pbx3b	1.39679e-10			cox6c	2.66266e-09
					syt12	3.07808e-10			tomm20b	2.98264e-09
					atp6v1c1a	3.59081e-10			capns1a	3.29598e-09
					r3hdm1	5.14642e-10			esrrb	3.65069e-09
					rpl26	5.53515e-10			si:dkey-28e7.3	4.17532e-09
					hnrnpabb	6.25175e-10			b3glcta	4.48568e-09
					ndufa4	8.82457e-10			kif5aa	4.89034e-09
					atp1b1b	9.33942e-10			vsnl1a	5.4222e-09
					ctnnb1	1.28541e-09			eml2	5.85945e-09
					stx1b	1.9631e-09			uqcrq	7.32158e-09
					h2afvb	1.96352e-09			nptna	7.39717e-09
					ndrg3a	3.15373e-09			atp5po	8.25738e-09
					eef1b2	3.25504e-09			map1ab	8.68338e-09
					sh3gl2a	3.36768e-09			si:dkey-44g23.5	8.71146e-09
					rtn3	3.49342e-09			flot2a	8.75349e-09
					ndrg2	4.17665e-09			mbnl3	9.49496e-09
					pabpc1b	4.41629e-09			zgc:193541	1.04903e-08
					aldoaa	4.82033e-09			rpl22	1.17955e-08
					si:ch211-235e9.8	9.59961e-09			timm17a	1.34052e-08
					syngr3a	1.09546e-08			tmsb1	1.38879e-08
					cct4	2.02447e-08			tpi1a	1.46362e-08
					gnao1b	2.20978e-08			atp1b1b	1.70391e-08
					hes6	2.41206e-08			myl6	1.82416e-08
					si:ch73-119p20.1	3.15489e-08			sdc4	2.1373e-08
					gadd45ba	4.23985e-08			mpc1	2.48185e-08
					kif5aa	4.3516e-08			ldha	2.64266e-08
					map1b	6.55084e-08			oxr1b	2.64972e-08
					si:dkey-35i13.1	7.53885e-08			gchfr	2.98141e-08
					uchl1	7.97588e-08			si:dkey-188i13.11	3.27446e-08
					tomm5	9.34687e-08			atpaf2	3.3358e-08
					CAMK2N1	1.23178e-07			btbd6b	3.78596e-08
					rcc2	1.54981e-07			mych	3.91888e-08
					necap1	1.6207e-07			arhgef1b	3.97654e-08
					map1lc3a	1.91567e-07			cox4i1	4.04708e-08
					sdhb	4.80309e-07			tomm5	5.01016e-08
					pgk1	6.05964e-07			gabarapl2	5.03591e-08
					tmbim4	6.36762e-07			rca2.1	5.21361e-08
					rbbp4	7.85452e-07			eif4ebp3	5.22996e-08
					ctnnbip1	9.68892e-07			acyp1	5.37057e-08
					lin7a	9.81656e-07			fryl	7.31986e-08
					myca	1.44085e-06			lpin1	7.45881e-08
					dap1b	1.46387e-06			hrasb	8.79547e-08
					dpm2	2.2297e-06			rpl5b	8.94445e-08
					hnrnpa0a	2.99174e-06			ndufs4	9.19271e-08
					zgc:92066	3.19979e-06			tcp11l1	9.37513e-08
					atp6v1c1b	1.20669e-05			atp5if1b	9.56781e-08
					snrpd2	1.20874e-05			uqcrb	1.08447e-07
					snrpd3l	6.15618e-05			nr2f2	1.13028e-07
					ube2ib	7.69141e-05			hccsb	1.25357e-07
					hsbp1a	0.000150341			junba	1.29936e-07
					srsf6b	0.000217493			rrad	1.31518e-07
					rad21a	0.00023304			prdx3	1.33189e-07
					hmgb2a	0.000452126			ndrg2	1.49315e-07
					nrgna	0.000482038			nudt9	1.60147e-07
					hspa5	0.000680799			ugp2b	1.78034e-07
					dnajb1b	0.000805941			flot2b	1.88362e-07
					fus	0.00129656			coa6	1.88739e-07
					ppp1r10	0.00199709			dkk3a	2.14837e-07
					sox11b	0.00424209			ndufa9a	2.28285e-07
				17-27	gad2	2.35024e-43			cox5aa	2.72631e-07
					gad1b	4.45985e-38			ntrk3b	2.81935e-07
					slc32a1	7.99654e-38			ndufv3	3.47225e-07
					cplx2l	1.99388e-26			ndufb9	3.73469e-07
					slc6a1b	1.03958e-24			rgmb	3.97326e-07
					pax2a	1.53109e-24			ndufb5	4.12611e-07
					si:dkey-33c12.3	4.3738e-23			mhc1zba	4.21251e-07
					slc6a5	6.94914e-22			atp5mf	4.67443e-07
					acbd7	3.00236e-16			atp5if1a	4.73638e-07
					atp1b2a	4.10133e-15			cox7b	4.89559e-07
					rgs16	5.80586e-15			cplx1	5.04934e-07
					pvalb6	3.49822e-14			mab21l2	5.55583e-07
					atp1a3a	9.88487e-14			parvb	5.6913e-07
					cacna2d3	2.18583e-13			prnprs3	5.7661e-07
					lmo4a	2.31158e-13			trap1	5.85046e-07
					eno1a	1.4293e-12			lyrm7	7.33119e-07
					si:ch211-235e9.8	2.16859e-12			uqcr10	7.3563e-07
					cox17	2.68928e-12			mrpl36	9.07895e-07
					nsfa	2.0916e-11			COX5B	9.52424e-07
					mtbl	2.52125e-11			pacsin1b	9.8681e-07
					ndufa6	3.83841e-11			si:ch211-151p13.8	1.03853e-06
					oip5-as1	6.5755e-11			CU639469.1	1.04215e-06
					tubb2	8.09623e-11			phb2b	1.1581e-06
					stmn3	1.56258e-10			josd2	1.21625e-06
					pclob	2.9923e-10			cox5ab	1.34512e-06
					mdh2	3.33413e-10			glud1b	1.35855e-06
					sdhb	4.59543e-10			si:dkey-13i19.8	1.48488e-06
					si:dkey-205h13.1	5.44576e-10			cadpsb	1.51153e-06
					cycsb	9.20219e-10			glra1	1.52771e-06
					cox6b1	9.7288e-10			vdac3	1.54948e-06
					gbx1	1.18031e-09			gstk1	1.8662e-06
					nptna	2.67379e-09			rpia	1.86721e-06
					rgs8	2.706e-09			hprt1	1.86871e-06
					vsnl1a	2.94568e-09			sestd1	1.90124e-06
					oaz2b	2.99321e-09			si:dkey-205h13.1	1.99409e-06
					map4l	3.81459e-09			sdhc	3.09636e-06
					vamp1	4.00822e-09			ndufa11	3.12714e-06
					ndufa4	4.7733e-09			ptprr	3.17831e-06
					si:dkeyp-69c1.7	4.87808e-09			cd63	3.70751e-06
					ptgdsb.2	7.00015e-09			zfyve27	3.84373e-06
					sv2a	1.14188e-08			agla	4.14626e-06
					si:dkey-183i3.9	1.70861e-08			sdcbp2	4.29659e-06
					eef1a1a	2.07343e-08			nmnat2	4.60407e-06
					fgf12a	2.63661e-08			si:ch211-235e9.8	4.89368e-06
					pkma	2.7705e-08			pdk2a	5.00398e-06
					nat8l	2.90412e-08			pdzd11	5.3017e-06
					tspan18b	3.06561e-08			scrt2	5.53667e-06
					appb	3.77629e-08			ndufb7	6.20673e-06
					chga	4.56245e-08			mpc2	6.40156e-06
					si:dkey-175g6.2	5.94345e-08			nxph1	6.45624e-06
					sypa	7.06492e-08			si:ch211-150o23.3	6.66009e-06
					nptnb	9.55981e-08			acvr1ba	7.68882e-06
					slc25a3b	1.43415e-07			dhrs1	7.73217e-06
					cox5ab	1.48764e-07			lgmn	7.99541e-06
					pcp4a	2.50167e-07			si:ch211-113g11.6	8.27153e-06
					gnai2b	3.4712e-07			adcyap1r1a	8.3579e-06
					grin1a	3.65148e-07			uqcrc1	8.50156e-06
					ugp2b	3.80154e-07			tax1bp1b	9.24705e-06
					calb1	3.86891e-07			pam16	9.3298e-06
					cacng8b	3.88433e-07			chchd6b	9.37061e-06
					atp2b3b	4.4897e-07			eno1a	9.7209e-06
					uqcrc2b	4.60136e-07			creb3l3l	9.9013e-06
					mpc1	6.40511e-07			slc29a4	1.01965e-05
					trmt9b	6.98312e-07			ddx21	1.03478e-05
					clstn3	7.88504e-07			jade1	1.03936e-05
					pkib	9.34633e-07			htatip2	1.10303e-05
					hk1	1.1408e-06			ATP5MD	1.10473e-05
					eno2	1.1673e-06			sod2	1.20399e-05
					si:ch73-119p20.1	1.79252e-06			gabarapa	1.23866e-05
					bcl11ba	1.94104e-06			sdhb	1.27518e-05
					hagh	2.26633e-06			spock3	1.28761e-05
					sncgb	2.37194e-06			ccng1	1.28903e-05
					ndufa11	2.57716e-06			lztr1	1.34776e-05
					atp1b1b	2.71243e-06			ndufb2	1.37679e-05
					chchd10	3.07218e-06			acat1	1.55395e-05
					itm2cb	4.05079e-06			rgs3a	1.56243e-05
					rab6ba	4.18483e-06			mrps18b	1.57541e-05
					syt1a	6.44527e-06			bnip3lb	1.60813e-05
					clstn1	6.8689e-06			mrpl43	1.63851e-05
					nrsn1	7.33795e-06			pcbp4	1.64205e-05
					bcat2	7.67872e-06			ndufs8a	1.67836e-05
					aig1	7.77283e-06			ISCU (1 of many)	1.68041e-05
					dnajc6	8.08971e-06			atp5fa1	1.68095e-05
					bhlhe41	9.56045e-06			trappc6bl	1.692e-05
					uqcc3	1.11676e-05			gcdha	1.7107e-05
					qkia	1.19637e-05			cst14a.2	1.76516e-05
					sod2	1.24291e-05			si:ch1073-314i13.4	1.76586e-05
					rcan3	1.42121e-05			hoxb5a	1.77013e-05
					nat16	1.50938e-05			rgs5b	2.03509e-05
					en1b	1.66173e-05			minos1	2.05933e-05
					smim4	1.98063e-05			xiap	2.05999e-05
					cox7a3	2.37563e-05			sdha	2.25678e-05
					dpysl5b	2.64399e-05			ap1s2	2.25768e-05
					myrip	2.77082e-05			rab11ba	2.29272e-05
					meis2b	2.99146e-05			ubl7a	2.43335e-05
					nr2f2	3.00005e-05			higd2a	2.43389e-05
					ivd	4.68308e-05			ndufa10	2.5527e-05
					SYT2	4.8965e-05			rab6bb	2.81954e-05
					nxph1	5.55805e-05			echs1	2.85638e-05
					smdt1a	5.97051e-05			ppp1caa	3.08559e-05
					kif1b	6.93519e-05			lrrtm1	3.23875e-05
					ndufab1a	7.27871e-05			aamp	3.27369e-05
					rasd4	0.000135876			ndufs3	3.61892e-05
					ptgdsb.1	0.000147737			si:ch211-68a17.7	3.67429e-05
					zeb2b	0.000149818			pgam1a	3.78548e-05
					camta1a	0.000181645			si:dkey-239h2.3	3.88714e-05
					scrt1b	0.000224712			ndufb3	4.02486e-05
					sdha	0.000271904			tfb2m	4.20396e-05
					alcama	0.000294062			gpia	4.25208e-05
					PCP4L1	0.000314225			psma6b	4.45845e-05
					si:dkey-201i24.6	0.000375663			acadm	4.57482e-05
					msi2a	0.000426218			ndufb6	4.57742e-05
					kidins220b	0.000439764			atp5mc1	4.59155e-05
					aplp2	0.00044684			vdrb	4.81403e-05
					tns1a	0.000526976			cdk15	5.26473e-05
					gria1a	0.000534741			zgc:92027	5.77165e-05
					slc4a10a	0.000650469			atp5pd	5.79407e-05
					bahcc1b	0.000911662			mcl1b	5.83139e-05
					asb5b	0.00147534			rac1a	6.04431e-05
									uqcrc2b	6.23849e-05
									zgc:173570	6.5845e-05
									ndufa6	6.62361e-05
									dhrsx	6.86843e-05
									tprkb	6.91593e-05
									cd164	6.99705e-05
									fdx1	7.74895e-05
									alcama	8.30217e-05
									ndufs5	8.39909e-05
									si:ch211-134c9.2	8.48028e-05
									arhgef7b	8.62551e-05
									mrpl15	8.64686e-05
									tmem178	8.70135e-05
									arg2	8.83901e-05
									hsdl2	9.03755e-05
									elmod1	9.1437e-05
									mrps17	9.77004e-05
									usp36	9.90657e-05
									zgc:65851	0.000105497
									alg9	0.000107709
									nfyc	0.000108931
									nme3	0.000113206
									phyhiplb	0.000114124
									prps1a	0.000115782
									chrna5	0.000116037
									gng13b	0.000116308
									si:dkey-35i13.1	0.000120602
									chuk	0.0001224
									mdh2	0.000123078
									zgc:92335	0.000134813
									ndufa1	0.000137896
									foxo3b	0.000146589
									uxt	0.00014931
									zgc:92606	0.000166577
									myclb	0.000192373
									cdh11	0.000206077
									chka	0.000207492
									eif3g	0.000208085
									mpnd	0.000211355
									dldh	0.00021432
									ppp6c	0.000241367
									vps4b	0.000243772
									sqstm1	0.000251314
									pbx3b	0.000278369
									mettl15	0.000287577
									zgc:194659	0.000289461
									srprb	0.000296992
									sh3bgrl2	0.000308254
									lmbrd1	0.000327638
									srgap1b	0.000343201
									ctsba	0.000350183
									rtf2	0.000356478
									pdha1a	0.000413122
									pno1	0.000429639
									pik3r3b	0.000434941
									selenos	0.000459368
									proza	0.00054491
									stmn4	0.000572005
									BX470182.1	0.000590427
									tox3	0.000604815
									nfu1	0.000641076
									ctsla	0.000727052
									pdhb	0.000728193
									pcdh11	0.000804211
									coa3a	0.000827421
									tmem56b	0.000850655
									b2ml	0.00109524
									sms	0.00111502
									camta1b	0.00113111
									hpcal4	0.00119448
									zgc:100920	0.00145843
									cox8b	0.00147876
									btbd2a	0.00197184
									FP102783.1	0.00199853
									sinhcaf	0.00295383
									zgc:153018	0.00296345
									borcs7	0.00326689
								13-15	nr2f2	5.32216e-66
									zic2a	2.84076e-54
									tpt1	1.26207e-53
									tuba1a	1.66516e-53
									nkx2.2a	1.39405e-48
									si:ch211-222l21.1	3.76038e-48
									tubb5	1.53549e-47
									cd99l2	1.59864e-42
									sp9	2.06919e-42
									nr2f1a	1.41293e-41
									rps8a	2.06597e-40
									actb1	1.46809e-38
									rps15	1.64091e-36
									rps25	1.52048e-35
									BX569787.1	4.6615e-35
									rpl6	5.79559e-34
									rpl9	7.92556e-34
									hnrnpabb	8.52235e-34
									rpl10	1.17155e-32
									tmsb	1.48444e-32
									rpl26	1.56578e-32
									rpl24	1.2344e-31
									FP085414.1	2.457e-31
									rpl12	5.48418e-31
									zgc:114188	5.62261e-31
									zic5	6.977e-31
									cirbpb	7.20125e-30
									gbx2	3.24407e-29
									rps11	9.72474e-29
									shox2	1.4532e-28
									rpl17	2.84092e-28
									sox4a	5.49123e-28
									rpl10a	8.12964e-28
									rps24	1.0581e-27
									rack1	2.13318e-27
									rps14	3.18567e-27
									rps3a	3.39848e-27
									rps17	4.99785e-27
									si:dkey-56m19.5	8.12211e-27
									ddx5	1.72539e-26
									rpl22	4.1957e-26
									khdrbs1a	5.93696e-26
									eef1g	4.89053e-25
									zic4	1.19358e-24
									tubb2b	1.02205e-23
									rpl31	5.3424e-23
									eef1b2	1.07888e-22
									rpl21	1.16797e-22
									rps10	5.20411e-22
									zic1	5.69173e-22
									fscn1a	5.94602e-22
									rps3	6.31896e-22
									hdac1	7.17119e-22
									islr2	5.46436e-21
									cpne2	1.07791e-20
									syt5b	3.9553e-20
									rpl22l1	4.36032e-20
									ppiaa	7.75496e-20
									rpl13a	1.32959e-19
									hmga1a	2.27482e-19
									zgc:101840	3.03752e-19
									rpl23a	1.49191e-18
									si:dkey-35i13.1	2.93861e-18
									rbbp4	2.9581e-18
									cct4	5.87483e-18
									rps27.2	6.53338e-18
									nme2b.1	7.92006e-18
									eif4a1a	2.28647e-17
									pknox2	4.06781e-17
									eef2b	6.45317e-17
									tuba2	1.7544e-16
									rps23	2.75017e-16
									cct7	5.74126e-16
									seta	8.97482e-16
									rps26l	1.00342e-15
									rpl14	1.09065e-15
									sumo3a	1.73356e-15
									rps27a	3.30018e-15
									rcc2	4.12154e-15
									rasd1	4.71537e-15
									cnp	5.13456e-15
									rpl4	1.32075e-14
									CU467822.1	2.301e-14
									rpl5b	4.63228e-14
									si:ch211-202a12.4	4.89105e-14
									si:ch211-194k22.8	9.5846e-14
									ran	1.55534e-13
									neurod1	2.37402e-13
									sox4b	2.68866e-13
									baz2ba	3.10865e-13
									eif4ebp1	6.01516e-13
									uba52	9.3038e-13
									nxph1	1.08531e-12
									ppp1r10	1.22581e-12
									hnrnpa0a	1.85528e-12
									si:ch211-288g17.3	2.11749e-12
									calb2a	2.52152e-12
									hapln1a	3.43267e-12
									ppp1r14ba	5.33627e-12
									vat1	1.77459e-11
									prdx2	1.82574e-11
									h2afvb	3.30553e-11
									mpnd	4.31538e-11
									cct3	1.28352e-10
									eif3ba	1.30257e-10
									zgc:153115	3.46038e-10
									kctd4	3.49808e-10
									jun	5.73272e-10
									snrpd2	6.28101e-10
									si:ch73-46j18.5	6.71222e-10
									tuba8l4	7.15874e-10
									chd4a	8.80194e-10
									zbtb20	1.06084e-09
									dnajb1b	1.1237e-09
									slc1a2b	1.52103e-09
									snrpf	1.71773e-09
									nono	1.89058e-09
									si:dkey-110c1.10	2.29052e-09
									zgc:56304	2.97461e-09
									rpl5a	3.87532e-09
									mapre1b	4.12606e-09
									top1l	6.95649e-09
									cct5	9.64787e-09
									pcdh11	9.72852e-09
									cct8	2.17601e-08
									eif3f	2.26783e-08
									snrpe	2.86864e-08
									gng5	2.95018e-08
									pomp	3.8261e-08
									sat1a.2	3.86038e-08
									lhx2b	4.17913e-08
									marcksa	4.24109e-08
									pfn2l	4.25962e-08
									hnrnpr	4.31293e-08
									bcl2l10	4.38332e-08
									sf3b5	5.30399e-08
									arhgdia	6.24074e-08
									junba	6.30731e-08
									zfand5b	8.15441e-08
									pak2b	8.90302e-08
									si:dkey-12h9.6	9.00663e-08
									pacsin1b	9.30595e-08
									snrpg	1.22676e-07
									apex1	1.32676e-07
									ptp4a2a	1.39762e-07
									ilf2	1.49263e-07
									eif2s3	1.5559e-07
									med11	2.25459e-07
									eif5a	4.10359e-07
									adh5	4.12191e-07
									psmb1	4.42564e-07
									pfn2	4.82535e-07
									mid1ip1b	5.667e-07
									eif3m	6.44667e-07
									hnrnpl	1.21053e-06
									tcp1	1.27436e-06
									snrpd3l	1.39985e-06
									elavl4	1.40358e-06
									auts2a	1.41499e-06
									snrpd1	1.55296e-06
									dap	1.64092e-06
									si:ch211-10a23.2	1.83314e-06
									prelid3b	2.06436e-06
									eif4e1c	2.197e-06
									rad21a	2.23016e-06
									lzic	2.23803e-06
									tcea2	2.25451e-06
									celf3a	2.33793e-06
									arf5	2.40735e-06
									eif2s2	2.41606e-06
									pfdn2	2.91734e-06
									hspd1	3.29064e-06
									nr4a1	5.32877e-06
									zgc:77086	5.57932e-06
									smarcb1b	5.63644e-06
									nkain1	7.65377e-06
									eif3k	1.17573e-05
									u2af2a	1.41681e-05
									abcf1	1.44064e-05
									rgs5b	1.47681e-05
									aldh2.1	1.66773e-05
									slc25a55a	1.7585e-05
									dnajb11	1.84145e-05
									eny2	2.69622e-05
									nr2f6a	2.83786e-05
									hspa5	2.99716e-05
									ola1	3.08843e-05
									slc16a9b	3.35876e-05
									oser1	3.46676e-05
									atrx	3.64824e-05
									dclk1b	3.66839e-05
									yaf2	3.92744e-05
									caprin1a	4.33112e-05
									pim3	4.41968e-05
									actl6a	5.14053e-05
									gtpbp4	5.41097e-05
									phc2a	5.96173e-05
									chd5	8.12802e-05
									atf3	8.73018e-05
									ppm1g	8.75173e-05
									rcan1a	9.02702e-05
									mcl1b	0.000112068
									kidins220b	0.000134518
									smarcd1	0.000134615
									si:rp71-45k5.4	0.000142993
									caprin1b	0.00015575
									shox	0.000177381
									hsp90b1	0.00018812
									foxp4	0.000200232
									si:dkey-28b4.7	0.000267987
									smarca4a	0.000288387
									tdh	0.000373214
									mapk11	0.000433491
									gad2	0.000589472
									si:ch211-251b21.1	0.000896476
									slc1a4	0.00107546
									pank1b	0.00140301
									lmo1	0.00291142
								44230	tal1	0
									gata3	0
									emx2	0
									slc6a1b	0
									gad1b	0
									gata2a	2.34725e-296
									tfap2b	6.96895e-235
									zfpm2b	1.35619e-229
									sox14	1.11367e-223
									nxph1	1.5248e-199
									gad2	7.59174e-176
									otx2b	1.26488e-147
									en2b	1.74445e-130
									slc32a1	5.03736e-125
									pax7b	7.60662e-125
									lhx1a	1.378e-122
									en2a	2.36362e-118
									pax7a	1.16564e-113
									snap25b	8.13718e-109
									uncx	8.16068e-109
									SYNPR	2.5311e-88
									CR936482.1	5.73583e-74
									zfpm2a	4.11028e-70
									fabp3	8.46384e-67
									hmgb2b	3.61612e-65
									tfap2a	1.89255e-64
									zc4h2	2.29195e-64
									elavl4	4.82606e-64
									foxp4	1.1966e-61
									atp5mc3b	2.72399e-59
									lef1	7.61656e-57
									robo2	4.47981e-56
									si:ch211-137a8.4	4.79465e-56
									cplx2l	2.17971e-55
									ppp1r14c	4.81775e-54
									rbfox1	5.46652e-54
									lmo1	1.26801e-45
									ndrg2	1.87965e-45
									slc6a1a	4.62092e-45
									syt2a	2.34019e-42
									sinhcafl	1.67931e-40
									ing4	1.07077e-38
									pknox2	4.22887e-38
									cirbpb	1.13163e-36
									ndufa4	3.96254e-33
									oip5-as1	6.40116e-33
									rorab	1.44292e-31
									roraa	1.11119e-30
									lhx5	4.08696e-30
									tmem178b	1.36508e-29
									six3a	2.18128e-29
									tcf7l2	2.96349e-29
									cxcl14	1.43815e-28
									zgc:136929	1.56838e-28
									mycb	1.80191e-27
									cplx2	2.59617e-25
									sox11a	6.32361e-25
									id2a	2.94461e-24
									pbx1a	4.88059e-23
									laptm4b	4.2292e-22
									nptnb	5.30223e-22
									si:dkeyp-123h10.2	1.06707e-21
									si:ch73-290k24.5	1.19881e-21
									si:dkey-175g6.2	2.05012e-21
									cacng8b	4.63309e-21
									chchd10	3.28378e-20
									adgrb1a	1.90019e-19
									ebf3a	3.09615e-19
									btbd6b	2.76515e-18
									tomm40l	3.12568e-18
									si:ch211-284f22.3	9.12884e-18
									myrip	1.58214e-17
									atp2b3a	2.57309e-17
									pvalb6	1.24907e-15
									rnd3a	1.89363e-15
									calb2a	2.72251e-14
									edil3a	3.09161e-14
									chd4a	3.20639e-12
									insig1	4.53549e-12
									her15.1	1.00273e-10
									her15.2	1.09935e-06
								60-62	rtn4rl2a	4.41315e-28
									tspan18a	1.41133e-25
									penkb	1.01289e-21
									ngb	5.59194e-19
									six3b	1.14357e-16
									rab6ba	3.46765e-16
									mgll	1.2493e-15
									cxcl14	1.61634e-14
									fam49al	7.89833e-14
									SMIM18	1.36157e-12
									six3a	2.71975e-12
									rasd1	3.04083e-12
									ywhaz	4.24374e-12
									rtn4rl2b	1.28013e-10
									gap43	1.69619e-10
									elavl4	2.22674e-10
									vat1	7.13492e-10
									FAM19A3	8.10157e-10
									pabpc1b	8.77569e-10
									zgc:114118	1.07024e-08
									mpped1	1.08935e-08
									kctd12.1	6.46217e-08
									phlda2	9.77102e-08
									ctnnd2a	1.92548e-07
									znf536	1.93513e-07
									junba	2.25259e-07
									sox1a	2.27417e-07
									smu1b	2.44447e-07
									mpped2a	3.9229e-07
									vax1	4.0766e-07
									hpcal4	4.4658e-07
									bcl11ba	4.96352e-07
									dpp6b	1.33621e-06
									pik3ip1	1.98429e-06
									rab6bb	2.23806e-06
									sox11b	2.71303e-06
									uchl1	3.01898e-06
									gnai2a	3.35536e-06
									ak5	3.38888e-06
									b3gat2	3.61604e-06
									islr2	4.55212e-06
									syt3	8.85735e-06
									mllt11	1.18244e-05
									tmsb2	1.1933e-05
									dynll2a	1.27654e-05
									dynll2b	1.49919e-05
									tcea2	1.72402e-05
									ctnnbip1	1.7914e-05
									rasgef1ba	2.02622e-05
									gli3	2.12279e-05
									hmgb1b	2.15648e-05
									syt9a	3.09018e-05
									zgc:112332	3.66899e-05
									fosl2	4.06632e-05
									dixdc1a	4.26566e-05
									kctd4	5.18584e-05
									cspg5a	7.25854e-05
									h3f3c	9.60376e-05
									sec61g	0.000106924
									sox2	0.000113244
									nr4a1	0.000135785
									clstn1	0.00014808
									hrasb	0.000150594
									arg2	0.000173208
									pyya	0.000193438
									pik3r3b	0.000197718
									si:dkey-19b23.8	0.000201115
									fgf13a	0.000230049
									si:ch211-56a11.2	0.000237634
									mibp2	0.000249696
									msi2b	0.000249897
									camkvb	0.000256972
									lasp1	0.000261783
									cadps2	0.000266027
									zeb2a	0.000266836
									stmn2a	0.000268795
									dpysl5a	0.000277013
									tmem178b	0.000292543
									egr2b	0.000298296
									tle3a	0.000315505
									slc6a9	0.000315505
									igdcc3	0.000378353
									tmem178	0.000387873
									npdc1b	0.000444617
									r3hdm1	0.000449638
									CDPF1	0.000455966
									XKR4	0.000574185
									ak4	0.000608124
									zgc:65894	0.000630895
									rpl4	0.000640804
									raver2	0.000666924
									nr4a3	0.000727299
									rps15	0.000737782
									sp9	0.000768305
									ncaldb	0.000782961
									cmasa	0.000829885
									foxo1a	0.000869648
									cd9b	0.00090796
									eva1a	0.00090796
									p3h2	0.00090796
									zfpm2a	0.00090796
									npas4a	0.000914212
									arl5c	0.000921415
									dclk1b	0.000975045
									rcan3	0.000995177
									dclk1a	0.00102917
									syt5b	0.00104364
									rps3a	0.00104557
									clstn2	0.00112128
									hes6	0.00114534
									rnf19a	0.00126305
									rps10	0.00135165
									zgc:165481	0.00137529
									ndufa6	0.00144517
									traf4a	0.00150015
									slc6a2	0.00153484
									ldb2b	0.00153484
									rbm14b	0.00153484
									rpl10	0.00155386
									epdr1	0.00168986
									timp2a	0.00171817
									clstn3	0.00173202
									fam133b	0.00177697
									tox2	0.00191675
									actb1	0.00194677
									CABZ01079011.1	0.0020023
									ptprua	0.00215683
									si:dkeyp-75h12.5	0.0022871
									cox6b1	0.00230863
									FP085414.1	0.00245218
									rab3b	0.00255655
									tox	0.00258548
									rab2a	0.00259921
									marcksb	0.00269945
									plcxd3	0.00291622
									rpl24	0.00336965
									ube2d4	0.00342179
									gpr78a	0.00346323
									cox8b	0.00352753
									lrrtm2	0.00377644
									tmsb1	0.00380284
									srgap1b	0.0039826
									brd1b	0.00398289
									foxg1a	0.00422114
									rrad	0.00458275
									cry2	0.00485162
								44546	gad1b	5.65256e-172
									snap25a	1.84728e-99
									slc6a1b	1.8867e-98
									mab21l1	4.14642e-80
									BX005003.1	3.36304e-73
									vat1	4.03309e-71
									lhx1a	3.21339e-68
									elavl4	3.69599e-68
									scg2b	3.6628e-67
									rasd1	5.20713e-66
									ywhaz	4.68227e-65
									cplx2l	5.22824e-61
									rgs5b	4.26883e-59
									plk2b	4.55753e-59
									nr4a1	6.49794e-59
									islr2	9.54652e-58
									xbp1	1.25129e-57
									meis2b	5.91603e-57
									fosb	2.4975e-56
									meis1b	4.03982e-56
									kctd4	2.46995e-54
									ddx5	1.16568e-50
									FP085414.1	3.43313e-50
									ndrg2	1.1804e-49
									cpne2	7.35792e-49
									slc35g2a	8.42597e-49
									oip5-as1	8.63923e-49
									ndufa4	1.22148e-44
									ngb	1.05621e-43
									gap43	5.32236e-43
									pam	6.12867e-43
									kctd12.1	8.06795e-43
									mao	9.72998e-42
									fosl2	5.23224e-41
									junba	5.56236e-40
									rbfox1	2.455e-39
									pbx3b	7.27622e-37
									si:dkey-7j14.5	9.90805e-37
									ncalda	1.1265e-36
									higd1a	2.2032e-34
									sh3bp5la	3.63545e-34
									nhlh2	1.5194e-33
									msi2b	2.73264e-33
									pcbd1	3.58603e-33
									bdnf	4.37618e-33
									slc32a1	6.08876e-32
									cbln1	1.04527e-31
									npas4a	4.36424e-31
									arg2	4.67532e-31
									si:ch211-137a8.4	9.22356e-31
									tmem59l	1.21581e-30
									CAMK2N1	5.73493e-28
									sat1a.2	6.96946e-28
									ctnnb1	9.47862e-28
									ndufa4l	1.02157e-27
									syt4	6.40858e-27
									map4l	1.01003e-26
									fam168a	1.79717e-25
									jund	3.51468e-25
									plcxd3	9.6378e-25
									jun	1.68301e-24
									rsrp1	2.09327e-24
									eno1a	2.43153e-24
									stx1b	3.70527e-24
									vdac1	8.20763e-24
									rps17	9.64163e-24
									adcyap1r1a	1.33202e-23
									zic2a	3.12251e-23
									hsbp1a	3.15463e-23
									rergla	1.28992e-22
									sik1	3.5296e-22
									arhgdia	6.72199e-22
									pcsk1nl	2.2858e-21
									mcl1a	4.22238e-20
									sncb	1.44344e-19
									glipr1b	4.19574e-19
									nptna	4.4891e-19
									dynll2a	6.85526e-19
									stmn2a	8.91866e-19
									hspa5	2.81931e-18
									junbb	4.49236e-18
									reep5	4.58902e-18
									adcyap1b	7.86135e-18
									si:dkey-177p2.6	1.05254e-17
									myl12.1	1.36154e-17
									tubb5	1.55435e-17
									nanos1	2.59301e-17
									uchl1	2.84321e-17
									kidins220b	3.12724e-17
									fxyd6	3.2959e-17
									hmgb2b	3.37242e-17
									si:dkey-33c12.3	4.68512e-17
									mycbp	4.88411e-17
									sox11a	8.64163e-17
									hnrnpabb	1.09375e-16
									ptprna	1.61467e-16
									tmsb1	1.84167e-16
									tefa	2.87988e-16
									si:ch211-222l21.1	2.88055e-16
									necab1	4.24775e-16
									prelid3b	1.19601e-15
									SERP1	1.22005e-15
									cox6b1	1.31582e-15
									si:dkey-35i13.1	1.32672e-15
									cox5ab	1.42137e-15
									bcl2l10	1.90457e-15
									ndrg3a	2.06106e-15
									si:dkeyp-75h12.5	2.69711e-15
									dclk1a	4.52073e-15
									sult4a1	6.3827e-15
									atp1b2a	1.23997e-14
									syn2a	1.70332e-14
									jdp2b	1.75948e-14
									eif5a2	2.17202e-14
									tpt1	3.0601e-14
									rcan1a	3.6792e-14
									vgf	5.5724e-14
									tmsb	8.17207e-14
									cox6a1	9.84024e-14
									h2afvb	1.0104e-13
									mdkb	1.55575e-13
									chga	1.98216e-13
									ppib	2.4411e-13
									mllt11	2.52626e-13
									diras1a	2.57636e-13
									tdh	2.69301e-13
									sept5a	2.83057e-13
									rbm4.3	3.12245e-13
									stmn2b	3.1275e-13
									atf3	4.25573e-13
									ssr4	8.68621e-13
									cox7a2a	9.83345e-13
									anp32e	1.17943e-12
									ppp1cab	1.18171e-12
									COX5B	1.3522e-12
									actb1	1.79193e-12
									creb3l3l	2.65058e-12
									grin1b	3.40363e-12
									sec11a	3.73583e-12
									IGLON5	3.77014e-12
									ptpn5	5.20054e-12
									lsm4	7.23908e-12
									oser1	8.15479e-12
									gchfr	8.58708e-12
									dbi	1.46726e-11
									glula	2.10508e-11
									btg2	2.33406e-11
									selenof	2.81891e-11
									slc25a33	2.88307e-11
									eef2b	3.23445e-11
									pdia3	3.81599e-11
									trim9	4.52436e-11
									ckmt1	4.62e-11
									eif4ebp1	4.7009e-11
									cnbpb	5.3196e-11
									acat1	9.64149e-11
									si:ch73-119p20.1	1.08215e-10
									ndrg3b	2.01091e-10
									plk3	2.31679e-10
									chac1	2.61679e-10
									si:ch211-202a12.4	2.83272e-10
									tomm5	3.98186e-10
									uqcrh	4.24663e-10
									hnrnpa0a	5.6062e-10
									aldoaa	5.89534e-10
									tpi1b	1.07519e-09
									bhlhe41	1.104e-09
									pde4ba	1.94872e-09
									nova2	2.15672e-09
									dnajb1b	2.38073e-09
									atp6v1b2	2.54482e-09
									nsfa	2.55108e-09
									stxbp1a	2.63255e-09
									SMIM18	2.73966e-09
									vamp2	2.94221e-09
									cd99l2	3.05215e-09
									uqcrb	4.10625e-09
									her4.1	4.82168e-09
									lhfpl3	6.61642e-09
									si:dkey-56f14.4	9.7988e-09
									mpc1	1.02777e-08
									tuba1a	1.27098e-08
									mdh1aa	1.39608e-08
									syt12	1.42538e-08
									mid1ip1b	1.7488e-08
									map1b	2.04041e-08
									flrt3	2.58392e-08
									vdac2	3.51862e-08
									mdh2	3.86955e-08
									map1lc3b	4.30512e-08
									sox11b	4.74636e-08
									sdhb	5.26933e-08
									upf3a	6.28591e-08
									cox5aa	6.73848e-08
									h1fx	6.85486e-08
									rab6ba	7.9254e-08
									midn	9.78959e-08
									cd9a	1.12785e-07
									tomm20b	1.15229e-07
									ube2e3	1.44679e-07
									sh3gl2a	1.80801e-07
									hmgn3	1.82752e-07
									clta	2.56202e-07
									eef1a1a	2.89786e-07
									ndufa6	2.91025e-07
									gnao1b	3.29942e-07
									si:ch211-196l7.4	3.42923e-07
									ciarta	3.87648e-07
									cycsb	4.10241e-07
									idh2	4.17091e-07
									atp5meb	5.14853e-07
									ndufs7	5.47056e-07
									cbx3b	1.38882e-06
									otpb	1.77971e-06
									csdc2a	1.84989e-06
									histh1l	2.36848e-06
									zgc:92606	2.54313e-06
									zgc:77056	3.06471e-06
									itm2ba	3.33897e-06
									calm1b	4.44427e-06
									uqcr10	5.5013e-06
									atp5mc3a	5.54014e-06
									si:ch211-235e9.8	1.0432e-05
									ndufa12	1.11788e-05
									gpia	1.34272e-05
									atp5pb	1.42246e-05
									ndufb9	2.48684e-05
									snap25b	2.7624e-05
									nfkbiab	2.84085e-05
									scg3	2.97049e-05
									atp1a3a	3.36518e-05
									pbx1a	4.53483e-05
									map1ab	4.73772e-05
									hes6	5.26325e-05
									cyc1	0.000103939
									mpc2	0.000106586
									atp5fa1	0.000130149
									zgc:110158	0.000144742
									nrxn1a	0.000149682
									elmo1	0.000165917
									slc6a1a	0.000176663
									znf395b	0.000234029
									zgc:113208	0.000262065
									sdhdb	0.000299494
									uqcrc1	0.000309378
									lin7b	0.000316087
									rab11bb	0.000346632
									dpm2	0.000393918
									amph	0.000461653
									ppm1la	0.000542859
									ube2e2	0.000556951
									her4.2	0.000641342
									epb41a	0.000700568
									elmod1	0.000878602
									sprn	0.000909891
									lmo3	0.000940849
									ndufa11	0.000959062
									itm2cb	0.00107508
									atp2b2	0.00132914
									atp6v1c1a	0.00135681
									scn2b	0.00139628
[truncated: 687 more rows]

## Sheet: p-value of RBPs in each pattern
9-61	44227	44322	16-36	44239	44266	13-24	17-27	7-38	23-25	27-54	20-41	13-15	44230	60-62	44546	17-24	44530
3.73471e-36	2.12899e-84	0		8.98386e-10	2.1927e-92	1.26478e-16	6.98312e-07	8.91863e-32	1.4797e-46	1.01088e-23	1.36507e-108	8.52235e-34	4.82606e-64	2.22674e-10	3.69599e-68	4.53996e-19	3.7118e-49
9.44407e-32	7.14336e-12	4.72614e-104		1.71582e-08	8.78173e-92	5.55681e-16	1.19637e-05	1.72879e-24	2.68159e-44	2.59937e-14	3.26367e-30	7.20125e-30	7.61656e-57	8.77569e-10	2.455e-39		2.56768e-18
1.56655e-30	6.94871e-08	1.87232e-103		6.62963e-06	9.55194e-31	6.63631e-16	0.000426218	1.25449e-18	1.04792e-41	1.53281e-06	1.5608e-09	5.93696e-26	5.46652e-54	0.000249897	2.73264e-33		5.4677e-15
1.63935e-29	1.48793e-07	2.64295e-101			7.07554e-20	7.26399e-14		4.32894e-16	1.18621e-08	1.23577e-05	9.49496e-09	2.28647e-17	1.13163e-36	0.000666924	1.09375e-16		1.35474e-12
3.376e-28	8.29066e-07	6.84715e-69			7.65337e-20	6.25175e-10		6.7433e-16	1.09841e-06	7.17422e-05	1.64205e-05	1.85528e-12	3.20639e-12	0.00153484	2.17202e-14		3.48823e-10
2.61925e-26		2.38323e-64			1.21257e-17	4.41629e-09		1.7494e-14	3.58853e-06	0.00020042	0.000208085	1.30257e-10		0.00732306	3.12245e-13		1.00936e-09
2.61037e-23		1.03328e-63			7.16916e-14	2.99174e-06		2.12838e-14	0.000197518	0.000530184		8.80194e-10		0.0106086	7.23908e-12		4.48003e-08
6.85402e-15		8.96312e-63			6.50755e-12	6.15618e-05		9.46577e-14	0.00125119	0.0020813		1.71773e-09		0.0114507	5.3196e-11		4.42775e-05
8.11542e-15		3.30333e-61			1.10318e-11	0.0170348		4.42755e-11	0.00189421	0.00612898		2.26783e-08		0.0156474	5.6062e-10		7.54374e-05
6.89943e-12		1.26177e-59			4.77089e-11			7.54761e-10	0.0084971	0.00916052		2.86864e-08		0.0183751	2.15672e-09		0.000111248
1.32785e-05		8.27917e-58			2.51935e-10			2.21007e-08		0.0113526		4.31293e-08		0.0531046	6.28591e-08		0.000337778
0.000145488		1.87922e-55			3.14502e-08			2.29871e-08		0.012892		5.30399e-08		0.0681274	1.84989e-06		0.000470434
0.0187651		3.56228e-42			1.03329e-07			2.80062e-08		0.0177718		1.22676e-07		0.0686567	0.0291824		0.000789915
0.0277065		2.22245e-41			1.0574e-07			5.13013e-08		0.0235435		1.5559e-07		0.0706372			0.000790621
		3.13109e-41			2.36858e-07			4.88765e-07		0.0417953		4.10359e-07		0.0745022			0.000861955
		1.58622e-34			2.22796e-06			4.21615e-06		0.0450492		6.44667e-07		0.0807072			0.001168
		2.90703e-34			5.92384e-05			5.12601e-06		0.0622001		1.21053e-06		0.0845202			0.00280421
		1.30362e-33						1.52705e-05		0.0649865		1.39985e-06		0.0874158
		1.06516e-30						1.56093e-05		0.0749728		1.40358e-06		0.087859
		2.56264e-30						1.96054e-05				1.55296e-06		0.107817
		6.65438e-29						3.41912e-05				2.197e-06		0.108205
		1.20452e-27						3.80474e-05				2.33793e-06		0.110055
		1.19462e-26						3.84614e-05				2.41606e-06		0.114821
		3.95398e-26						4.48858e-05				1.17573e-05		0.116497
		1.39006e-25						6.55951e-05				1.41681e-05		0.116611
		8.14979e-25						7.37489e-05				0.00644766		0.127433
		1.51137e-23						7.78684e-05						0.136566
		3.99136e-23						0.00011206						0.139116
		1.43676e-22						0.000144668						0.184102
		1.16254e-21						0.000315152						0.195447
		3.73312e-21						0.000335555						0.203872
		6.87421e-20						0.000784795						0.206234
		2.53243e-19						0.000892588						0.217844
		5.36068e-19						0.000994801						0.230912
		2.78056e-17						0.00129405						0.313436
		3.20657e-17												0.318961
		5.26723e-16												0.337165
		9.49671e-16												0.341542
		1.66927e-14												0.347778
		1.88518e-13												0.386894
		4.36967e-13												0.943951
		8.90873e-13
		4.77979e-11
		1.71371e-08
