# Supplementary material for: The landscape of regulatory genes in brain-wide neuronal phenotypes of a vertebrate brain
Source: eLife. 2021 Dec 13;10:e68224. doi: 10.7554/eLife.68224 (PMC8769648; doi:10.7554/eLife.68224)
Supplement: Figure 5—source data 3. [file elife-68224-fig5-data3.xlsx]

## Sheet: function pattern specific RBPs
shared (n = 7)		matched-specific (n = 8)		convergent-specific (n = 10)		divergent-specific (n = 52)
qkia	mRNA transport, splicing, translaton	arnt2	unknown	elavl3	mRNA stability	eif1b	translation
hnrnpabb	capping, splicing	celf1	splicing, mRNA stability, translation	nsun2	unknown	eif4a1a	translation
hnrnpa0a	capping, splicing	dicer1	splicing	eif3ha	translation	larp6a	translation
elavl4	mRNA stability	zfr	unknown	tia1	polyadenylation	lsm6	splicing, mRNA stability
pabpc1b	polyadenylation	nova1	splicing	u2af1	splicing, mRNA transport	lsm8	splicing, mRNA stability
lef1	unknown	pum1	mRNA transport, translation	taf15	translation	snrpg	splicing
khdrbs2	polyadenylation, mRNA transport	taf3	translation	polr2d	translation	eif2s2	translation
				trmt9b	unknown	eif4e1c	translation
				rpp25b	translation	magoh	splicing, mRNA transport, translation
				msi2a	mRNA stability	larp4ab	translation
						sf3a2	splicing
						hnrpkl	capping, splicing
						elavl1b	mRNA stability
						eif5	translation
						trim13	translation
						srebf2	mRNA transport, translation
						upf3a	mRNA transport, translation
						eif4a2	translation
						lsm4	splicing, mRNA stability
						papolg	polyadenylation
						sart3	splicing
						isg20	translation
						lsm3	splicing, mRNA stability
						snrnp70	splicing
						slu7	splicing
						rbm28	translation
						eif5a2	translation
						mbnl3	splicing
						pcbp4	translation
						eif3f	translation
						celf3a	splicing, mRNA stability, translation
						u2af2a	splicing
						rbm14b	splicing, translation
						snrpa1	splicing
						trmt112	unknown
						sfpq	splicing
						polr2j	unknown
						sf3b4	splicing
						taf13	translation
						taf10	translation
						rbm25b	splicing, translation
						eif3s10	translation
						u2af2b	solicing
						hnrnpa1b	capping, splicing
						igf2bp3	mRNA transport, translation
						hnrnpl2	capping, splicing
						raver2	mRNA transporter
						mbnl2	unknown
						raly	splicing
						cnbpb	unknown
						celf2	splicing, mRNA stability, translation
						celf4	splicing, mRNA stability, translation
