# Supplementary material for: The landscape of regulatory genes in brain-wide neuronal phenotypes of a vertebrate brain
Source: eLife. 2021 Dec 13;10:e68224. doi: 10.7554/eLife.68224 (PMC8769648; doi:10.7554/eLife.68224)
Supplement: Figure 5—source data 4. [file elife-68224-fig5-data4.xlsx]

## Sheet: pattern specific RBPs binding
share	matched	convergent	divergent
slc9a3r1a	slc8a1b	slc9a3r1a	tomm34
rassf6	rassf6	rassf6	psmb13a
rimbp2	rimbp2	rimbp2	zgc:112437
tomm34	tomm34	tomm34	klhdc10
psmb13a	psmb13a	psmb13a	rhoj
zgc:112437	zgc:112437	zgc:112437	matn4
prph2la	prph2la	prph2la	net1
klhdc10	chico	chico	eif4enif1
tmed5	klhdc10	klhdc10	tacc3
rhoj	tmed5	tmed5	polb
net1	rhoj	rhoj	gmppb
tacc3	matn4	matn4	NPC2
polb	net1	net1	gad1b
fam49a	tacc3	tacc3	med19b
podn	polb	pycr3	amy2a
gmppb	fam49a	podn	ak2
NPC2	pycr3	gmppb	gpr183a
gad1b	podn	NPC2	igl3v2
med19b	gad1b	gad1b	tie1
amy2a	med19b	med19b	kmo
ak2	amy2a	amy2a	pdpk1b
gpr183a	ak2	ak2	tfa
rnf13	myo7ab	myo7ab	ewsr1b
ppef1	gpr183a	gpr183a	hpca
igl3v2	igl3v2	drd4-rs	gng3
trmt61a	gabpb2a	ppef1	ube2l3b
gabpb2a	tie1	igl3v2	idh2
tie1	kmo	gabpb2a	rhcgl1
kmo	pdpk1b	tie1	hnmt
pdpk1b	rab2a	kmo	poc1b
tfa	ewsr1b	pdpk1b	nqo1
rab2a	hpca	tfa	prkcbp1l
ewsr1b	gng3	rab2a	si:dkeyp-34c12.1
hpca	fkbp9	ewsr1b	thap12b
gng3	ube2l3b	hpca	rtraf
fkbp9	asic1a	gng3	def6a
ube2l3b	idh2	fkbp9	gadd45bb
asic1a	bfsp2	ube2l3b	chm
idh2	rhcgl1	asic1a	krt93
bfsp2	poc1b	idh2	gnb3b
hnmt	mphosph10	bfsp2	churc1
poc1b	lrrc23	poc1b	rnpep
mphosph10	nqo1	mphosph10	glipr2l
prkcbp1l	prim2	lrrc23	abcd3b
si:dkeyp-34c12.1	prkcbp1l	nqo1	dhrs7
rtraf	si:dkeyp-34c12.1	prkcbp1l	jagn1b
gadd45bb	uqcrb	si:dkeyp-34c12.1	dffb
chd4a	def6a	uqcrb	shisa4
rer1	gadd45bb	thap12b	slc50a1
chm	chd4a	rtraf	agk
krt93	rer1	def6a	cops2
churc1	chm	gadd45bb	dhx16
rnpep	churc1	chd4a	pde4a
glipr2l	rnpep	rer1	map3k15
dhrs7	slitrk2	chm	myo3a
slitrk2	fgf1a	krt93	dnm1l
fgf1a	otub1b	churc1	tp53bp2a
jagn1b	jagn1b	rnpep	igbp1
rad21a	rad21a	glipr2l	dmac2l
dffb	dffb	abcd3b	elovl5
bmp2k	shisa4	dhrs7	psmb1
slc50a1	bmp2k	slitrk2	mtfr1l
pik3cd	slc50a1	fgf1a	gcat
cops2	pik3cd	otub1b	zmat2
dhx16	cops2	jagn1b	slit2
tfeb	dhx16	rad21a	slc30a1a
pde4a	plekhb2	dffb	tssk6
map3k15	tfeb	shisa4	eefsec
myo3a	map3k15	slc50a1	isoc2
dnm1l	dnm1l	pik3cd	stmn1a
uqcrfs1	uqcrfs1	dhx16	zgc:77739
igbp1	tp53bp2a	hacd3	si:ch211-160o17.2
dmac2l	igbp1	gtf2f2b	pdcb
psmb1	psmb1	pde4a	rffl
zmat2	mtfr1l	map3k15	aurka
tssk6	gcat	myo3a	prelid3b
eefsec	zmat2	dnm1l	si:dkey-193b15.5
isoc2	nhlh2	uqcrfs1	c1qtnf6b
stmn1a	slc30a1a	igbp1	skp1
si:ch211-160o17.2	tssk6	dmac2l	yipf5
pdcb	eefsec	psmb1	anp32a
pfkma	isoc2	mtfr1l	rpl12
aurka	stmn1a	zmat2	otofa
prelid3b	rffl	nhlh2	gprc6a
adat3	pfkma	tssk6	znf503
pgam1a	aurka	eefsec	atp6v1e1a
zbtb1	adat3	isoc2	ufl1
c1qtnf6b	pgam1a	stmn1a	ddx11
skp1	zbtb1	zgc:77739	mxb
ube2al	skp1	si:ch211-160o17.2	gpatch1
yipf5	ube2al	pdcb	zfand1
anp32a	yipf5	rffl	cct8
rpl12	anp32a	pfkma	cct6a
otx2b	rpl12	aurka	nsd2
gprc6a	otx2b	prelid3b	rhag
znf503	gprc6a	adat3	mhc1uba
atp6v1e1a	rab11al	pgam1a	MARK4
sept5b	atp6v1e1a	zbtb1	ppifa
impdh2	impdh2	si:dkey-193b15.5	pimr110
aimp2	aimp2	c1qtnf6b	mitfb
mxb	ddx11	skp1	mfsd4ab
zfand1	gpatch1	ube2al	pgm2l1
cct6a	zfand1	yipf5	actr1
nsd2	cct6a	anp32a	hsp70.3
rhag	nsd2	rpl12	serpinb1l3
mhc1uba	rhag	otx2b	acsl1b
smad7	kcna1b	otofa	ptdss1a
dmd	mhc1uba	gprc6a	syt14a
ppifa	smad7	znf503	mrpl24
pvalb2	dnajb6b	atp6v1e1a	agt
ugt1a7	ppifa	sept5b	cers5
mitfb	pvalb2	impdh2	twist3
mfsd4ab	mitfb	aimp2	asmtl
pgm2l1	mfsd4ab	ddx11	atp1a2a
hsp70.3	runx1t1	mxb	cnr1
serpinb1l3	actr1	gpatch1	zgc:101716
acsl1b	hsp70.3	zfand1	mmp13a
ptdss1a	serpinb1l3	cct6a	mkks
agt	acsl1b	nsd2	eya2
asmtl	ptdss1a	rhag	ppm1bb
zgc:158689	syt14a	kcna1b	fgb
atp1a2a	mrpl24	mhc1uba	rad54l
entpd8	casr	smad7	uso1
cnr1	cers5	dmd	hdlbpa
ntm	asmtl	ppifa	sycp1
nkd2a	atp1a2a	pvalb2	zbtb22a
slc6a1l	entpd8	ugt1a7	syap1
zgc:101716	nkd2a	mitfb	dhcr24
mmp13a	slc6a1l	mfsd4ab	armc1
mkks	mmp13a	pgm2l1	dvl2
eya2	mkks	actr1	en1a
ppm1bb	ppm1bb	hsp70.3	MPP4
klf1	fgb	serpinb1l3	slc31a1
ccdc149b	klf1	acsl1b	galk2
uso1	ccdc149b	ptdss1a	drd4a
neurod1	rad54l	agt	sel1l
hdlbpa	uso1	cers5	snupn
sycp1	neurod1	asmtl	wdr12
syap1	hdlbpa	zgc:158689	amfra
armc1	sycp1	atp1a2a	fgf20a
dvl2	zbtb22a	entpd8	syt5b
MPP4	ppm1na	cnr1	cog8
slc31a1	gata5	ntm	b4galt6
galk2	syap1	nkd2a	prmt3
drd4a	dhcr24	slc6a1l	oxct1a
slc1a6	armc1	zgc:101716	bzw1a
sel1l	dvl2	mmp13a	tmbim4
snupn	en1a	mkks	agxtb
wdr12	MPP4	ppm1bb	si:dkey-42i9.4
fev	slc31a1	klf1	mycla
st8sia2	galk2	ccdc149b	abcc9
syt5b	drd4a	rad54l	gda
cog8	mxb	uso1	pth2r
cse1l	mxc	neurod1	rfxank
b4galt6	fabp11b	hdlbpa	zgc:100829
ppp1r3cb	slc1a6	sycp1	ggctb
oxct1a	sel1l	ppm1na	tcea2
fam20b	snupn	syap1	znf330
bzw1a	wdr12	dhcr24	glcea
cdc73	amfra	armc1	tnxba
ppp4r4	fgf20a	dvl2	hip1
agxtb	fev	en1a	insyn1
si:dkey-42i9.4	scp2a	MPP4	akr7a3
mycla	syt5b	slc31a1	asb6
abcc9	cse1l	drd4a	hcfc1a
gda	b4galt6	mxc	alpi.1
mst1rb	ppp1r3cb	fabp11b	zgc:103692
plecb	oxct1a	slc1a6	twf1b
dpf2	fam20b	sel1l	capns1a
pth2r	bzw1a	snupn	cyb5r1
rfxank	cdc73	wdr12	ubiad1
zgc:100829	tmbim4	fgf20a	sdha
ggctb	ppp4r4	fev	klhl24b
zgc:112148	agxtb	scp2a	mylz3
sec31b	mycla	st8sia2	fzr1a
tcea2	abcc9	syt5b	capns1b
znf330	gda	cog8	ndrg3a
tnxba	mst1rb	b4galt6	si:ch73-199e17.1
mical3a	plecb	ppp1r3cb	dcps
rnls	dpf2	prmt3	ugt5b2
pax6b	ggctb	oxct1a	zgc:103759
insyn1	tcea2	fam20b	slc35f6
cpm	znf330	bzw1a	gucy1a1
ddx39aa	tnxba	ppp4r4	FP016062.1
nfe2	mical3a	agxtb	npsn
akr7a3	insyn1	si:dkey-42i9.4	rergla
asb6	cpm	mycla	ncam1a
hcfc1a	ddx39aa	abcc9	postna
alpi.1	npas2	gda	xkr6a
zgc:103692	nfe2	mst1rb	tdg.1
gadd45gb.1	akr7a3	dpf2	numb
capns1a	comta	pth2r	ctbp2a
cyb5r1	hcfc1a	rfxank	sfpq
ubiad1	polr3glb	zgc:100829	tbc1d17
klhl24b	alpi.1	ggctb	rnpc3
dbx1b	twf1b	zgc:112148	klhl32
ercc4	gadd45gb.1	tcea2	spag6
fzr1a	cyb5r1	znf330	fam151b
capns1b	ubiad1	glcea	naa15a
ncaldb	klhl24b	tnxba	vps50
zmp:0000000521	dbx1b	hip1	fancf
ndrg3a	ercc4	mical3a	FOXK2
her1	fzr1a	rnls	ncoa5
si:ch73-199e17.1	capns1b	pax6b	itga5
dcps	ncaldb	insyn1	ywhaqb
rgs5b	ndrg3a	ddx39aa	he1.2
ugt5b2	her1	npas2	rpa3
zgc:103759	dcps	nfe2	rnf11a
memo1	rgs5b	akr7a3	scamp3
gucy1a1	ugt5b2	asb6	arhgdig
rnf2	gucy1a1	klf3	pdcd10b
FP016062.1	rnf2	hcfc1a	dnase1
npsn	dmbx1a	polr3glb	maco1b
dmbx1a	rergla	alpi.1	arid2
rergla	ncl	zgc:103692	v2rx1
ncl	ncam1a	gadd45gb.1	pon1
ncam1a	snrpc	capns1a	sdr16c5a
snrpc	postna	cyb5r1	clic2
xkr6a	xkr6a	ubiad1	xpnpep1
tdg.1	sfpq	sdha	dip2ba
numb	tbc1d17	klhl24b	arih1
ctbp2a	rnpc3	dbx1b	tm9sf2
prdm1a	klhl32	mylz3	efcab6
klhl32	tnfb	ercc4	tmem50a
tnfb	spag6	fzr1a	arpc4
spag6	fam151b	capns1b	unc119.1
fam151b	pgd	ncaldb	slc2a3b
pgd	naa15a	zmp:0000000521	ndrg2
vps50	ccdc146	ndrg3a	rhbdd1
ccdc146	mrpl19	her1	COX5B
zgc:112294	fancf	si:ch73-199e17.1	opcml
FOXK2	FOXK2	dcps	hsp90ab1
gsk3b	gsk3b	rgs5b	ywhah
ncoa5	itga5	ugt5b2	sf1
fbxl2	ywhaqb	zgc:103759	pdia6
ywhaqb	he1.2	memo1	chrna1
he1.2	vmp1	gucy1a1	fam92a1
pcyt1aa	pcyt1aa	rnf2	snx13
rnf11a	rpa3	FP016062.1	lipf
arhgdig	scamp3	npsn	mapk4
asb14a	asb14a	rergla	aldoaa
pdcd10b	pdcd10b	ncl	CABZ01111496.1
dnase1	dnase1	snrpc	lypd6
maco1b	maco1b	xkr6a	fancl
arid2	arid2	tdg.1	CR792422.1
v2rx1	v2rx1	numb	pex13
atp5f1d	pon1	ctbp2a	arl3l2
pon1	bmp2a	tbc1d17	chrna5
bmp2a	clic2	rnpc3	ralgps2
clic2	dnajb6a	prdm1a	cldnb
xpnpep1	arih1	klhl32	ccnc
fam91a1	usf1	tnfb	uts2b
dip2ba	nacad	spag6	ptf1a
arih1	tm9sf2	fam151b	med15
usf1	efcab6	pgd	zgc:136461
dgkb	tmem50a	naa15a	rfc2
nacad	arpc4	vps50	zhx3
phc2b	mbtps1	ccdc146	crybg1b
efcab6	unc119.1	zgc:112294	ak5
arpc4	slc2a3b	mrpl19	metap1d
mbtps1	ndrg2	fancf	kif25
ndrg2	COX5B	FOXK2	hes6
rhbdd1	opcml	gsk3b	efhc1
COX5B	hsp90ab1	ncoa5	tnnc1a
opcml	ywhah	ywhaqb	vldlr
hsp90ab1	sort1a	he1.2	prkcsh
ywhah	msrb2	pcyt1aa	ddx1
ivns1abpb	sf1	rnf11a	zp2.5
sort1a	chrna1	scamp3	mybpc1
msrb2	fam92a1	arhgdig	wdr33
sf1	rpl27	asb14a	epha2a
si:ch211-113e8.6	snx13	pdcd10b	rarres3l
pdia6	tcf3a	dnase1	hoga1
chrna1	lipf	maco1b	tnfa
fam92a1	mapk4	arid2	si:ch1073-459j12.1
rpl27	fbxo38	v2rx1	si:dkey-32n7.4
snx13	aldoaa	atp5f1d	gtf2f1
lipf	ankrd50l	pon1	kif4
mapk4	fancl	bmp2a	fabp7a
fbxo38	pgghg	clic2	sigmar1
aldoaa	pex13	dnajb6a	ccdc127b
CR792422.1	dnaja1	fam91a1	her11
pgghg	tas1r3	dip2ba	cnot3b
pex13	chrna5	arih1	tmem59l
uxt	rnf128a	usf1	chuk
chrna5	ralgps2	dgkb	cacna2d4b
rnf128a	cldnb	nacad	brms1lb
ralgps2	uts2b	phc2b	mrps22
si:ch211-51a6.2	ptf1a	efcab6	amph
cldnb	rfc2	tmem50a	nedd1
uts2b	gpia	arpc4	chd9
ptf1a	crybg1b	mbtps1	rrm2
rfc2	ak5	slc2a3b	mad2l1
zhx3	metap1d	ndrg2	necap1
gpia	ankrd46b	rhbdd1	cds2
crybg1b	kif25	COX5B	gsta.2
cnih1	hes6	opcml	p2rx8
ak5	efhc1	hsp90ab1	snu13b
metap1d	tnnc1a	ywhah	mfsd4aa
hes6	vldlr	ivns1abpb	lrrk1
efhc1	prkcsh	sort1a	pnp4a
zgc:172270	ddx1	msrb2	wdr26b
tnnc1a	nutf2l	sf1	antxr1a
vldlr	gorasp1a	si:ch211-113e8.6	znhit3
prkcsh	mybpc1	pdia6	synj2bp
ddx1	fam76b	chrna1	mapk1
slc5a9	ripk1l	fam92a1	rpl18a
zp2.5	slc38a5b	rpl27	cdh7a
gorasp1a	gpx1a	snx13	slc25a4
mybpc1	ppp1caa	tcf3a	slc45a2
fam76b	wdr33	lipf	adra1aa
ripk1l	csnk1da	mapk4	si:dkey-172h23.2
gpx1a	gad1a	fbxo38	nasp
ppp1caa	sept5a	ankrd50l	skilb
wdr33	rarres3l	CABZ01111496.1	mical1
crema	hoga1	fancl	tpgs2
drg2	tnfa	CR792422.1	fzd5
csnk1da	bhlhe40	pgghg	tsg101a
gad1a	gtf2f1	pex13	tor1l3
epha2a	fabp7a	uxt	si:ch73-106l15.2
sept5a	sigmar1	dnaja1	galnt14
rarres3l	evpla	arl3l2	si:dkey-256h2.1
tnfa	gpc4	chrna5	ddx51
si:dkey-32n7.4	ccdc127b	rnf128a	hddc3
bhlhe40	aldocb	ralgps2	nup35
gtf2f1	akt2	si:ch211-51a6.2	taf5l
kif4	her11	cldnb	tspo
fabp7a	cnot3b	ccnc	cep135
mybphb	tmem59l	uts2b	oser1
sigmar1	chuk	ptf1a	si:ch211-285c6.3
evpla	cacna2d4b	rfc2	gas2a
ccdc127b	amph	zhx3	zbed4
mmp2	nedd1	gpia	gpatch11
utp25	chd9	crybg1b	rbm28
aldocb	rrm2	cnih1	tlr4bb
akt2	hmgcl	ak5	mcf2a
her11	mad2l1	metap1d	kbtbd12
cnot3b	smn1	kif25	spast
tmem59l	foxf2a	hes6	kif26ab
cacna2d4b	ccdc191	efhc1	kcnip1b
xpo7	gsta.2	zgc:172270	cept1b
mrps22	p2rx8	tnnc1a	ptp4a3
nedd1	snu13b	vldlr	htatip2
add3a	aptx	prkcsh	tmem38a
rrm2	itgb4	ddx1	bnip3la
hmgcl	pnp4a	slc5a9	atad1a
mad2l1	nkx6.1	zp2.5	sumo3a
necap1	antxr1a	gorasp1a	sec24d
cds2	znhit3	mybpc1	vps26c
ccdc191	synj2bp	fam76b	si:ch211-254c8.3
gsta.2	vsx2	ripk1l	zgc:101100
p2rx8	cdh7a	gpx1a	slc38a3a
snu13b	slc45a2	ppp1caa	usp49
mfsd4aa	adra1aa	wdr33	srpk1a
aptx	nasp	crema	kif26bb
itgb4	skilb	csnk1da	zgc:172218
lrrk1	tpgs2	gad1a	epha4b
pnp4a	tsg101a	epha2a	phf21aa
nkx6.1	tor1l3	sept5a	fam50a
antxr1a	galnt14	rarres3l	ggps1
znhit3	hddc3	tnfa	slc25a10
synj2bp	nup35	si:dkey-32n7.4	tnfrsf21
mapk1	taf5l	bhlhe40	namptb
vsx2	apoob	kif4	cox6a1
cdh7a	ttyh3b	fabp7a	ucmaa
slc25a4	cep135	mybphb	ap1s3b
slc45a2	smad1	sigmar1	crhb
si:dkey-172h23.2	tnnt3b	evpla	rprmb
nasp	ap2s1	ccdc127b	gsto1
skilb	oser1	tubg1	trappc5
mical1	gas2a	mmp2	dnajc4
tpgs2	zbed4	utp25	suv39h1a
zgc:73226	gpatch11	aldocb	inip
tor1l3	ddx56	akt2	naa40
si:ch73-106l15.2	ntmt1	her11	hcn3
tmem136a	lsm14b	cnot3b	myoc
galnt14	tlr4bb	tmem59l	cops7a
si:dkey-256h2.1	mcf2a	chuk	mhc1zca
hddc3	ntpcr	xpo7	rnf25
zgc:162324	spast	mrps22	ntn1b
nup35	kif26ab	amph	lrp11
plekhf2	chrnb1l	nedd1	tpma
taf5l	cept1b	add3a	cbx1b
tspo	ptp4a3	rrm2	vcla
ttyh3b	htatip2	hmgcl	sap30bp
trappc4	cxxc1b	mad2l1	hspbap1
cep135	bnip3la	necap1	slc9a7
smad1	atad1a	cds2	slc20a1b
tnnt3b	pkp2	ccdc191	pgm3
oser1	sumo3a	gsta.2	nup107
si:ch211-285c6.3	sec24d	p2rx8	casc3
gas2a	clic5a	snu13b	pcolce2a
zbed4	irx5b	mfsd4aa	cnpy3
ddx56	iscub	aptx	tenm1
ntmt1	vps26c	itgb4	asl
tlr4bb	vash2	lrrk1	efna2a
mcf2a	zbtb2b	pnp4a	pik3r3b
ntpcr	slc38a3a	nkx6.1	gnptab
kbtbd12	srpk1a	wdr26b	add3a
kif26ab	kif26bb	antxr1a	sptb
chrnb1l	zgc:172218	znhit3	tax1bp1b
lpar5a	epha4b	synj2bp	eif4ebp2
cept1b	ccnd3	mapk1	tbc1d14
ptp4a3	faah2a	vsx2	slc25a48
htatip2	ggps1	cdh7a	slc38a9
tmem38a	slc25a10	slc45a2	esr2b
cxxc1b	tbx5a	si:dkey-172h23.2	atg3
bnip3la	cd81b	nasp	morn5
atad1a	focad	skilb	emc9
pkp2	tnfrsf21	tpgs2	camk1b
sumo3a	crx	fzd5	glipr1b
sec24d	dpp7	zgc:73226	slc4a4a
clic5a	namptb	tsg101a	krt95
pdlim5b	cox6a1	tor1l3	tm9sf3
irx5b	ucmaa	si:ch73-106l15.2	ccnb3
iscub	trim63a	tmem136a	otofb
vps26c	ap1s3b	galnt14	trmt2b
si:ch211-254c8.3	crhb	si:dkey-256h2.1	cyp26a1
zgc:101100	rassf1	ddx51	trim35-28
slc38a3a	rprmb	hddc3	grin1a
srpk1a	gsto1	nup35	ssu72
ing3	rflna	plekhf2	pdk2b
kif26bb	trappc5	taf5l	ccdc3b
epha4b	sppl3	tspo	map1lc3a
phf21aa	inip	apoob	fahd1
ccnd3	klhl6	ttyh3b	tango6
ggps1	hcn3	trappc4	insb
cd81b	cavin2a	cep135	dicp2.1
focad	mhc1zca	smad1	epha6
tnfrsf21	ntn1b	tnnt3b	slc25a25b
crx	asic2	ap2s1	thbs3b
dpp7	trmt44	oser1	ftr43
namptb	lrp11	si:ch211-285c6.3	guca1c
hirip3	tpma	gas2a	prkg1b
cox6a1	cbx1b	zbed4	tbck
ucmaa	sap30bp	gpatch11	timm8a
trim63a	tm9sf5	ddx56	foxd1
ap1s3b	ssbp3b	ntmt1	ethe1
crhb	hspbap1	lsm14b	nup188
rassf1	nt5c1bb	rbm28	traf2a
rprmb	slc20a1b	tlr4bb	si:dkey-256e7.5
gsto1	pgm3	mcf2a	trappc6bl
rflna	nup107	kbtbd12	slc2a15a
trappc5	casc3	spast	chrm2b
sppl3	pcolce2a	kif26ab	atp2a1
dnajc4	cnpy3	kcnip1b	agfg1a
jak1	tenm1	chrnb1l	mef2cb
inip	asl	lpar5a	kcnq2b
naa40	tbc1d7	tsc1a	hif1aa
myoc	myf6	cept1b	adarb1a
cavin2a	efna2a	ptp4a3	stxbp3
mhc1zca	atp11a	htatip2	pou2f3
rnf25	pik3r3b	tmem38a	nfkbib
ntn1b	mapk14a	cxxc1b	fnbp1l
asic2	elavl1a	bnip3la	foxk2
trmt44	zgc:110224	atad1a	actr3b
lrp11	gnptab	pkp2	srgap2
ppp1r14bb	rgs12a	sumo3a	slc7a2
vcla	add3a	sec24d	prkrip1
sap30bp	sptb	clic5a	dhrs13b
ssbp3b	ing5a	si:ch211-173n18.3	rab41
nt5c1bb	tax1bp1b	pdlim5b	shisa2a
slc20a1b	nuf2	irx5b	zgc:110626
pgm3	eif4ebp2	iscub	irx6a
nup107	tbc1d14	vps26c	rint1
casc3	slc38a9	si:ch211-254c8.3	si:dkey-222n6.2
pcolce2a	gsto2	cycsb	tbc1d20
cnpy3	atg3	zbtb2b	grtp1b
tenm1	emc9	slc38a3a	rbm24b
asl	pfkfb3	usp49	rcan3
tbc1d7	camk1b	srpk1a	tkta
myf6	glipr1b	ing3	gatad1
efna2a	slc4a4a	kif26bb	zgc:91910
atp11a	krt95	zgc:172218	rps3a
pik3r3b	tm9sf3	epha4b	arntl1b
mapk14a	otofb	phf21aa	si:dkey-103j14.5
zgc:110224	trmt2b	ccnd3	grn2
gnptab	cyp26a1	fam50a	cnn2
rgs12a	trim35-28	faah2a	rps28
lyn	mtx2	ggps1	atp6v1c1b
ing5a	grin1a	tbx5a	rida
tax1bp1b	ssu72	focad	lingo1b
nuf2	ywhaz	tnfrsf21	crabp1b
eif4ebp2	col11a1a	crx	fam49al
tbc1d14	tmeff2b	dpp7	ptprn2
slc38a9	cx52.6	namptb	zgc:110699
atg3	grb10a	hirip3	rps20
emc9	ccdc3b	cox6a1	exosc6
pfkfb3	map1lc3a	ucmaa	cnep1r1
camk1b	fahd1	trim63a	spry2
glipr1b	sepsecs	ap1s3b	hnrnpa0b
slc4a4a	tango6	crhb	vps35l
tm9sf3	cadpsb	rassf1	mbpa
ccnb3	insb	rprmb	c3a.1
otofb	dicp2.1	gsto1	vps11
trmt2b	srpk1b	rflna	c1galt1c1
cyp26a1	epha6	trappc5	slc3a2a
trim35-28	slc1a4	sppl3	serpinh2
mtx2	slc25a25b	suv39h1a	fam122b
grin1a	thbs3b	jak1	s1pr2
ssu72	ftr43	inip	kdm2ba
ywhaz	rpl18	klhl6	polr2f
col11a1a	gria3b	naa40	cab39l
cx52.6	guca1c	hcn3	hax1
ccdc3b	prkg1b	cavin2a	naa80
clybl	tbck	tuba8l4	slc34a2b
mapk7	foxd1	mhc1zca	arih1l
map1lc3a	ethe1	rnf25	rps12
fahd1	si:dkey-256e7.5	ntn1b	hsd3b7
sepsecs	trappc6bl	asic2	bms1
cadpsb	ppp1r10	trmt44	aldh9a1b
si:dkeyp-86f7.4	slc2a15a	lrp11	dnajc22
insb	hs1bp3	cbx1b	zdhhc14
tmpoa	chrm2b	ppp1r14bb	mat2ab
srpk1b	angpt1	vcla	denr
epha6	uspl1	sap30bp	trmo
rab1ab	irx5a	tm9sf5	wdr92
slc1a4	atp2a1	ssbp3b	gpr157
slc25a25b	agfg1a	hspbap1	phc2a
thbs3b	mef2cb	nt5c1bb	polr1e
ftr43	grcc10	slc20a1b	tmem192
CABZ01088134.1	kcnq2b	pgm3	prps1b
gria3b	dip2bb	nup107	slc35c2
guca1c	hif1aa	casc3	st3gal5
prkg1b	acss1	pcolce2a	tusc3
tbck	cdkl1	cnpy3	lhx9
ethe1	pex19	tenm1	aurkb
si:dkey-256e7.5	nfkbib	asl	rnf175
trappc6bl	fnbp1l	tbc1d7	pls3
ppp1r10	foxk2	myf6	zgc:103678
slc2a15a	actr3b	efna2a	uncx4.1
hs1bp3	scg5	atp11a	zgc:136472
chrm2b	ola1	pik3r3b	acss2
angpt1	srgap2	mapk14a	b4galt5
irx5a	slc7a2	zgc:110224	igfals
atp2a1	prkrip1	gnptab	il11a
ndufb7	dhrs13b	rgs12a	wnt9b
tram2	vamp1	lyn	timm29
mef2cb	shisa2a	zgc:101840	snrnp70
grcc10	rint1	ing5a	tnnt1
kcnq2b	si:dkey-222n6.2	tax1bp1b	dtx2
dip2bb	slc52a2	nuf2	osr2
hif1aa	tbc1d20	eif4ebp2	tpk1
cdkl1	grtp1b	tbc1d14	ergic3
gabpb1	rbm24b	slc38a9	rbfox1
adarb1a	rcan3	atg3	slc37a4a
stxbp3	si:ch211-243j20.2	emc9	si:dkeyp-59c12.1
pou2f3	tkta	pfkfb3	iba57
nfkbib	unc5b	camk1b	CRHR2
foxk2	ikzf1	glipr1b	tyw3
actr3b	plcd1b	slc4a4a	CABZ01074994.1
scg5	vipr1a	tm9sf3	natd1
ola1	gatad1	ccnb3	wnt6a
srgap2	si:dkey-267n13.1	otofb	cd151
slc7a2	zgc:91910	trmt2b	aspdh
prkrip1	rps3a	cyp26a1	ckmt2b
dhrs13b	arntl1b	trim35-28	si:ch211-125e6.11
shisa2a	si:dkey-103j14.5	mtx2	si:dkey-217f16.1
zgc:110626	grn2	grin1a	cnpy2
irx6a	cdkn2aip	ssu72	si:zfos-1505d6.3
rint1	cnn2	col11a1a	azin1a
slc52a2	rps28	cx52.6	fer1l6
tbc1d20	rpl30	grb10a	igsf8
grtp1b	atp6v1c1b	pdk2b	ftr13
rbm24b	lingo1b	ccdc3b	pik3r1
rcan3	crabp1b	clybl	sema4e
si:ch211-243j20.2	fam49al	mapk7	pitrm1
tkta	zgc:110699	map1lc3a	elovl4b
unc5b	rps20	fahd1	cadm2a
ikzf1	penkb	tango6	crp2
plcd1b	exosc6	cadpsb	CT573356.2
vipr1a	cnep1r1	si:dkeyp-86f7.4	igfbp1b
gatad1	nkd1	insb	csnk2a1
si:dkey-267n13.1	itln2	tmpoa	s100z
zgc:91910	rgs18	srpk1b	mrpl12
rps3a	bbox1	epha6	zgc:103625
arntl1b	hnrnpa0l	rab1ab	fam49ba
si:dkey-103j14.5	vps35l	slc1a4	faim2a
grn2	mbpa	slc25a25b	tmub1
cnn2	slc27a2a	thbs3b	ccdc24
rps28	gatm	CABZ01088134.1	pigp
rpl30	sb:cb649	gria3b	e2f5
atp6v1c1b	rras2	guca1c	ppid
fuca1.1	c3a.1	prkg1b	acox3
crabp1b	nucb2b	tbck	bmpr2a
fam49al	nucb2a	si:dkey-256e7.5	msl2a
ptprn2	ube2ia	trappc6bl	DPYSL2
zgc:110699	c1galt1c1	slc2a15a	zgc:113142
rps20	si:ch211-81a5.5	hs1bp3	si:dkey-61f9.1
penkb	acy3.1	chrm2b	csnk1g2a
exosc6	pcdh20	angpt1	hhatla
heatr3	serpinh2	irx5a	im:7138239
nkd1	hexim1	atp2a1	aep1
itln2	fam122b	ndufb7	tefa
sdhaf3	s1pr2	tram2	olfm3b
spry2	cbr1	mef2cb	zgc:162154
vps35l	polr2f	grcc10	st6gal2a
mbpa	cd74b	dip2bb	ska1
slc27a2a	rcbtb1	hif1aa	zgc:194209
gatm	cdadc1	acss1	lhx4
tmem144b	cab39l	cdkl1	nfkb2
sb:cb649	hax1	gabpb1	cyp46a1.2
c3a.1	scamp2	adarb1a	c8b
nucb2a	ifrd2	stxbp3	mat1a
c1galt1c1	mgll	pou2f3	nrgna
si:ch211-81a5.5	DXO	pex19	si:dkey-27m7.4
acy3.1	plagx	nfkbib	si:ch211-147h1.4
pcdh20	slc34a2b	fnbp1l	TSTA3
slc3a2a	arih1l	foxk2	helb
serpinh2	rps12	actr3b	xpc
fam122b	sgms2b	scg5	dcaf7
s1pr2	si:cabz01040626.2	ola1	zp3b
cbr1	hsd3b7	srgap2	lifrb
cd74b	ripply3	slc7a2	arpp19b
rcbtb1	bms1	prkrip1	c1qbp
cab39l	lsm6	dhrs13b	CR855393.1
hax1	ptger2b	vamp1	CABZ01059627.1
ifrd2	papola	shisa2a	rhbdl2
naa80	aldh9a1b	zgc:110626	cnr2
mgll	dnajc22	irx6a	si:ch1073-513e17.1
DXO	zdhhc14	rint1	ebag9
arih1l	ikzf4	si:dkey-222n6.2	mcm4
rps12	mat2ab	slc52a2	snai2
dolpp1	denr	tbc1d20	gbp
si:cabz01040626.2	trmo	grtp1b	zfpm2a
hsd3b7	si:ch211-145b13.5	rbm24b	si:ch211-215k15.4
smox	mtap	rcan3	zgc:101562
ripply3	nr3c1	si:ch211-243j20.2	kpnb3
lsm6	wdr92	tkta	slc38a11
ptger2b	gpr157	unc5b	atp13a1
aldh9a1b	phc2a	ikzf1	apoa2
lgals8a	rad9a	plcd1b	psph
dnajc22	med28	vipr1a	CABZ01041494.1
zdhhc14	polr1e	gatad1	rx2
ikzf4	prps1b	si:dkey-267n13.1	mindy3
mat2ab	tusc3	zgc:91910	rpp38
denr	aurkb	rps3a	unc50
trmo	rgs11	arntl1b	siae
si:ch211-145b13.5	rnf175	grn2	csgalnact1a
mtap	pmm2	cdkn2aip	spsb4b
wdr92	pls3	cnn2	rad1
gpr157	aup1	rps28	hnrnpul1
rpl9	zgc:103678	rpl30	phykpl
phc2a	uncx4.1	atp6v1c1b	c18h3orf33
si:ch1073-272o11.3	pvalb8	rida	rtf2
med28	igfals	fuca1.1	ttn.2
prps1b	il11a	crabp1b	si:ch73-27e22.4
slc35c2	atp5mf	fam49al	nifk
st3gal5	wnt9b	ptprn2	si:ch211-137j23.8
tusc3	timm29	zgc:110699	si:ch211-113j13.2
lhx9	snrnp70	rps20	tfb1m
aurkb	cpt1cb	penkb	crygm7
rgs11	tnnt1	exosc6	mxi1
ap1s2	thoc6	nkd1	kdelr3
pls3	dtx2	itln2	cbfb
aup1	osr2	sdhaf3	pnp6
zgc:103678	prph2a	spry2	olig2
uncx4.1	tpk1	bbox1	zgc:101731
b4galt5	si:dkey-156n14.5	vps35l	zgc:113149
polr3k	ergic3	mbpa	hspa13
il11a	cyc1	slc27a2a	fgf14
wnt9b	romo1	gatm	itgbl1
timm29	slc37a4a	tmem144b	zgc:152857
snrnp70	si:dkeyp-59c12.1	sb:cb649	mid1ip1a
tnnt1	xpa	rras2	mier1a
lrrc17	pdgfbb	c3a.1	chka
thoc6	iba57	nucb2b	wnt2
dtx2	cyb561	nucb2a	si:dkey-88n24.10
elob	CRHR2	ube2ia	crygm5
prph2a	slc35b1	vps11	setdb1a
tpk1	tyw3	c1galt1c1	gemin4
si:dkey-156n14.5	CABZ01074994.1	si:ch211-81a5.5	si:ch211-231m23.4
ergic3	tnpo2	acy3.1	zgc:110796
cyc1	natd1	slc3a2a	mrps25
romo1	wnt6a	serpinh2	mrpl51
si:dkeyp-59c12.1	cd151	hexim1	kansl3
cbln14	aspdh	fam122b	fosab
xpa	ckmt2b	s1pr2	zc3h14
pdgfbb	si:ch211-125e6.11	cbr1	yrdc
iba57	ascl1a	cd74b	uba52
zgc:103564	si:dkey-217f16.1	rcbtb1	pimr183
CRHR2	cnpy2	cab39l	pex10
slc35b1	sulf1	hax1	foxp2
tyw3	si:zfos-1505d6.3	scamp2	rasal1b
CABZ01074994.1	azin1a	ifrd2	mrpl39
tnpo2	mrps35	naa80	wdr83
wnt6a	igsf8	mgll	bbs2
aspdh	acy1	DXO	igf2r
ckmt2b	pik3r1	plagx	vtg2
ascl1a	st3gal1l	arih1l	tbc1d32
si:dkey-217f16.1	sema4e	rps12	rhot2
si:zfos-1505d6.3	gigyf2	sgms2b	rnf141
azin1a	pitrm1	dolpp1	rps25
mrps35	CR628323.2	si:cabz01040626.2	ccl38a.5
igsf8	cadm2a	hsd3b7	rbm39b
acy1	crp2	ripply3	angel2
cep41	CT573356.2	lsm6	ela2l
st3gal1l	igfbp1b	ptger2b	si:ch211-173a9.6
sema4e	gpr160	aldh9a1b	mau2
gigyf2	csnk2a1	lgals8a	si:dkey-4e7.3
CR628323.2	s100z	dnajc22	fpgt
elovl4b	zgc:103625	zdhhc14	mier3b
cadm2a	fam49ba	ikzf4	myo6b
crp2	faim2a	mat2ab	ncs1b
CT573356.2	abcf2a	slc8a4b	si:dkey-46a10.3
igfbp1b	tmub1	si:dkey-78k11.9	tmem243a
gpr160	ccdc24	igfbp5b	hsd17b3
csnk2a1	ppid	denr	efnb3b
s100z	babam2	trmo	ca4b
mrpl12	acox3	mtap	lpar2a
zgc:103625	si:ch211-207d6.2	ptges3a	si:dkeyp-55f12.3
fam49ba	bmpr2a	nr3c1	cldnk
abcf2a	msl2a	wdr92	si:ch211-251j10.3
tmub1	pacsin1b	gpr157	gstt1a
ccdc24	DPYSL2	rpl9	acot20
klhl20	zgc:113142	phc2a	katnbl1
pigp	dnajb4	si:ch1073-272o11.3	gnat2
e2f5	si:dkey-61f9.1	med28	actc1a
ppid	csnk1g2a	prps1b	tpd52l1
babam2	ftr69	slc35c2	CABZ01088025.1
acox3	hhatla	st3gal5	dym
si:ch211-207d6.2	im:7138239	tusc3	sema3h
bmpr2a	got1	aurkb	gstr
hectd3	aep1	rgs11	nhsl1b
msl2a	tefa	ap1s2	nrn1b
DPYSL2	cacnb1	pmm2	serpinc1
zgc:113142	olfm3b	pls3	ptpn1
ftr69	st6galnac5a	aup1	cebpb
hhatla	zgc:162154	zgc:103678	stx6
im:7138239	st6gal2a	uncx4.1	riok3
got1	ska1	b4galt5	cts12
aep1	zgc:194209	polr3k	git2b
tefa	dmrta2	igfals	yy1a
cacnb1	c8b	il11a	egr2b
olfm3b	sfxn3	atp5mf	tfdp2
cep78	mat1a	wnt9b	disp2
zgc:162154	si:dkey-27m7.4	timm29	enah
st6gal2a	si:ch211-147h1.4	snrnp70	itpka
ska1	mrpl38	cpt1cb	si:ch211-163l21.8
zgc:194209	TSTA3	tnnt1	rpl10a
dmrta2	helb	lrrc17	hsh2d
lhx4	zgc:123321	thoc6	gpr173
cyp46a1.2	xpc	dtx2	mfng
c8b	dync2li1	elob	zgc:100920
sfxn3	dcaf7	osr2	gng8
mat1a	zp3b	prph2a	cyp2p6
as3mt	gsta.1	tpk1	cyp2p8
si:dkey-27m7.4	lifrb	si:dkey-156n14.5	gcga
si:ch211-147h1.4	lamtor2	ergic3	fam43a
mrpl38	c1qbp	cyc1	slc26a11
TSTA3	CR855393.1	romo1	capn3b
helb	gnpnat1	rbfox1	grp
fam204a	CABZ01059627.1	si:dkeyp-59c12.1	alox5b.1
dcaf7	utp11l	cbln14	lxn
zgc:172182	hivep2a	xpa	pomca
zp3b	gpm6aa	pdgfbb	slc1a3b
gsta.1	si:ch1073-513e17.1	cyb561	rnasel2
lifrb	palld	CRHR2	adam17a
lamtor2	ebag9	slc35b1	LO017829.1
arpp19b	mcm4	tyw3	prrg1
c1qbp	gbp	CABZ01074994.1	gtf3c6
CR855393.1	scpep1	pkdccb	obscna
gnpnat1	si:dkey-95h12.1	tnpo2	srd5a3
arhgap32b	pi4kb	wnt6a	abraxas1
CABZ01059627.1	zfpm2a	aspdh	npy4r
utp11l	si:ch211-215k15.4	ckmt2b	fndc4a
pik3r1	znf1124	si:ch211-125e6.11	rpp21
rhbdl2	scrt1b	ascl1a	elovl6l
cnr2	slc38a11	si:dkey-217f16.1	egfl6
hivep2a	zgc:92590	si:zfos-1505d6.3	acox1
gpm6aa	atp13a1	azin1a	pde12
si:ch1073-513e17.1	apoa2	mrps35	TMCC1
snai2	psph	igsf8	cacng6b
rspo3	CABZ01041494.1	ftr13	b3galnt2
scpep1	rx2	st3gal1l	mmp15a
si:dkey-95h12.1	hvcn1	sema4e	si:ch211-215a10.4
pi4kb	mindy3	gigyf2	abcf1
zfpm2a	unc50	pitrm1	stx3a
si:ch211-215k15.4	enpp6	CR628323.2	cav2
znf1124	gsdmeb	elovl4b	tspan1
zgc:101562	zgc:113176	CT573356.2	rgs5a
kpnb3	zgc:92313	igfbp1b	cxcr1
slc38a11	siae	gpr160	CCKAR
zgc:92590	csgalnact1a	csnk2a1	agxta
atp13a1	spsb4b	s100z	dtymk
apoa2	bckdha	mrpl12	zgc:114041
gli3	rad1	zgc:103625	accs
psph	hnrnpul1	fam49ba	acvr1bb
CABZ01041494.1	c18h3orf33	faim2a	slc35d1a
rx2	rtf2	abcf2a	si:ch211-236k19.2
hvcn1	ttn.2	tmub1	zgc:171711
mindy3	si:ch73-27e22.4	ccdc24	rbfox2
rpp38	ccdc93	klhl20	aff2
enpp6	si:ch211-113j13.2	pigp	alkbh4
zgc:113176	chchd4b	e2f5	aplnra
zgc:92313	tfb1m	ppid	zgc:174931
spc24	crygm7	acox3	hnf1a
siae	mxi1	si:ch211-207d6.2	scrib
csgalnact1a	si:ch73-113g13.1	bmpr2a	higd2a
spsb4b	kdelr3	acaa2	BX927391.1
bckdha	cbfb	hectd3	cldnd1b
rad1	si:dkey-49n23.1	msl2a	mgat2
hnrnpul1	pnp6	DPYSL2	ankrd12
c18h3orf33	olig2	zgc:113142	syngr2a
rtf2	zgc:101731	dnajb4	rhpn1
ttn.2	zgc:113149	si:dkey-61f9.1	si:dkeyp-80c12.7
si:ch73-27e22.4	fgf14	ftr69	stx4
ccr10	itgbl1	hhatla	itga6l
si:dkeyp-52c3.7	or111-1	im:7138239	nitr13
si:ch211-113j13.2	zgc:152857	got1	aplnr2
chchd4b	mid1ip1a	aep1	tnmd
crygm7	mier1a	tefa	fermt1
mxi1	chka	cacnb1	bsdc1
si:ch73-113g13.1	anpepa	olfm3b	sept7b
kdelr3	cftr	st6galnac5a	bdh2
si:dkey-49n23.1	dnajc3a	zgc:162154	fam172a
pnp6	wnt2	st6gal2a	SLC9B2
rpl32	si:dkey-88n24.10	ska1	cisd2
olig2	crygm5	zgc:194209	ankrd31
dharma	nitr2b	dmrta2	gria2b
zgc:101731	setdb1a	zgc:110353	dlg3
zgc:113149	gemin4	lhx4	zfyve21
fgf14	si:ch211-231m23.4	nfkb2	runx3
itgbl1	zgc:110796	terb2	zfand3
mid1ip1a	mrps25	cyp46a1.2	htt
mier1a	mrpl51	sfxn3	golph3
chka	kansl3	mat1a	gabrp
dnajc3a	fosab	as3mt	ankrd2
wnt2	zc3h14	nrgna	CU550714.1
crygm5	yrdc	si:dkey-27m7.4	ubqln4
setdb1a	rab11a	si:ch211-147h1.4	rnft2
gemin4	pimr183	mrpl38	RTKN
si:ch211-231m23.4	pex10	TSTA3	thada
zgc:110796	foxp2	helb	pkib
mrps25	rasal1b	fam204a	carhsp1
mrpl51	mrpl39	dcaf7	pcp4a
kansl3	sgsm1b	zgc:172182	lrrc47
zc3h14	wdr83	zp3b	zgc:113377
rmdn3	mkrn1	gsta.1	cttnbp2nla
yrdc	zgc:55461	lifrb	zgc:113886
pimr183	vtg2	lamtor2	mtor
pex10	tbc1d32	arpp19b	asb5b
ppih	hsdl1	c1qbp	si:dkey-16p6.4
mrpl39	rhot2	CR855393.1	zgc:153911
wdr83	rnf141	gnpnat1	insm1b
vgll2a	rps25	arhgap32b	lrrc6
mkrn1	si:dkeyp-28d2.4	CABZ01059627.1	bdnf
zgc:55461	ccl38a.5	utp11l	pop5
vtg2	rbm39b	pik3r1	lipca
tbc1d32	sf3a1	rhbdl2	aqp9b
hsdl1	ccl38a.4	cnr2	srsf5b
rhot2	ela2l	hivep2a	gdf6a
rps25	si:ch211-173a9.6	gpm6aa	zgc:113054
si:dkeyp-28d2.4	brk1	si:ch1073-513e17.1	enpp7.1
ccl38a.5	nr1i2	snai2	kctd12.2
rbm39b	si:dkeyp-118h3.6	rspo3	f9a
tnfrsf19	mau2	gbp	tspan3b
ccl38a.4	tmem198a	scpep1	rfc4
angel2	rgmd	si:dkey-95h12.1	adob
ela2l	nudt3b	pi4kb	usp11
si:ch211-173a9.6	si:dkey-4e7.3	zfpm2a	htr1fb
brk1	elmo3	si:ch211-215k15.4	creb1a
nr1i2	mier3b	znf1124	ebi3
si:dkeyp-118h3.6	nr1h4	nek4	ndufaf6
mau2	drc1	havcr1	myb
tmem198a	paplnb	zgc:101562	gtf2a2
nudt3b	efnb3b	kpnb3	maea
si:dkey-4e7.3	ca4b	slc38a11	cldn17
elmo3	chrac1	zgc:110182	dcdc2b
mier3b	lpar2a	zgc:92590	CABZ01084566.1
myo6b	si:dkeyp-55f12.3	atp13a1	crlf3
nr1h4	noxred1	apoa2	hnrnpc
drc1	cldnk	gli3	ftr76
paplnb	zgc:103681	psph	scel
tmem243a	odf3b	CABZ01041494.1	ei24
efnb3b	si:ch211-251j10.3	rx2	ism2b
ca4b	nup205	hvcn1	inpp5l
chrac1	acot20	mindy3	crtc1b
lpar2a	katnbl1	rpp38	tmem62
si:dkeyp-55f12.3	unga	wdfy2	lin37
noxred1	gnat2	unc50	gpank1
cldnk	actc1a	enpp6	ppp1r2
nup205	taf1b	zgc:113176	mustn1a
gstt1a	slc38a5a	spc24	plin1
glod4	tpd52l1	siae	zgc:171779
acot20	CABZ01088025.1	csgalnact1a	irs1
katnbl1	tnni1c	spsb4b	tmem30b
gnat2	allc	bckdha	nmbr
actc1a	gstr	rad1	btr06
slc38a5a	nhsl1b	hnrnpul1	mrps17
tpd52l1	wtap	c18h3orf33	ltb4r2b
CABZ01088025.1	nrn1b	rtf2	phkg2
dym	serpinc1	ttn.2	cog4
sema3h	ptpn1	si:ch73-27e22.4	yars2
gstr	exo5	ccr10	kti12
nrn1b	grb7	si:dkeyp-52c3.7	stk33
ptpn1	stx6	si:ch211-113j13.2	rpe65b
exo5	riok3	chchd4b	rtn1a
stx6	cts12	crygm7	greb1
riok3	git2b	mxi1	lrp10
cts12	nfe2l2a	si:ch73-113g13.1	imp4
git2b	egr2b	kdelr3	smg1
yy1a	atp1b3b	cbfb	cnot6l
nfe2l2a	disp2	si:dkey-49n23.1	coro1a
tfdp2	si:ch211-163l21.8	pnp6	cldni
atp1b3b	rpl10a	rpl32	fli1a
disp2	hsh2d	olig2	si:dkey-51d8.1
si:ch211-163l21.8	mfng	dharma	pgpep1
rpl10a	zgc:100920	zgc:101731	adra2db
hsh2d	gng8	zgc:113149	gfpt2
mfng	cyp2p6	hspa13	lmo4b
zgc:100920	cyp2p8	fgf14	btr09
gng8	gcga	itgbl1	plcxd3
cyp2p8	fam43a	mid1ip1a	nucb1
gcga	slc26a11	mier1a	trappc8
fam43a	capn3b	chka	bcat2
slc26a11	MMP23B	dnajc3a	asap1a
capn3b	grp	wnt2	six2b
MMP23B	alox5b.1	si:dkey-88n24.10	tnn
grp	pomca	crygm5	mta3
pomca	ccnb1	nitr2b	myo1b
esr2b	esr2b	setdb1a	ppp2r5b
rnasel2	rnasel2	gemin4	zgc:101765
LO017829.1	prrg1	si:ch211-231m23.4	mc5rb
prrg1	nmu	zgc:110796	mc2r
atg101	gtf3c6	mrps25	tor4ab
rell2	srd5a3	mrpl51	ptch2
gtf3c6	ccdc6a	kansl3	bcl9l
abraxas1	abraxas1	zc3h14	pora
npy4r	npy4r	rmdn3	cyp27a1.4
rpp21	ackr3b	yrdc	slc7a7
plpp6	fndc4a	uba52	ncs1a
jun	plpp6	pimr183	snap23.2
si:dkey-86e18.1	depdc7b	pex10	foxq1b
depdc7b	elovl6l	foxp2	hmox2a
elovl6l	acox1	rasal1b	slc22a15
egfl6	zgc:123305	ppih	hic1
zgc:123305	pde12	mrpl39	exoc2
zgc:153704	sh3gl2b	wdr83	cgna
pde12	TMCC1	bbs2	poldip2
sh3gl2b	cacng6b	mkrn1	ruvbl2
TMCC1	chia.3	igf2r	prex1
cacng6b	b3galnt2	zgc:55461	spire1a
chia.3	mmp15a	tbc1d32	akap12b
b3galnt2	si:ch211-215a10.4	hsdl1	vps53
mmp15a	abcf1	rhot2	ino80c
stx3a	stx3a	cx28.9	vps26a
cav2	cav2	rps25	foxp3a
tcf12	tcf12	si:dkeyp-28d2.4	fosb
cxcr1	cxcr1	ccl38a.5	tmem115
CCKAR	CCKAR	rbm39b	zdhhc4
agxta	dtymk	tnfrsf19	dffa
dtymk	zgc:114041	sf3a1	bricd5
accs	adamtsl5	si:ch211-245h14.1	prss23
olfm1a	olfm1a	ccl38a.4	foxo4
slc35d1a	slc35d1a	angel2	kcnc3a
si:ch211-236k19.2	uap1	ela2l	tex10
uap1	zgc:171711	brk1	dmc1
zgc:171711	aff2	nr1i2	tmem161b
rbfox2	osgn1	si:dkeyp-118h3.6	hoxb13a
rcvrna	aspa	mau2	pip4p2
aff2	aplnra	tmem198a	slc4a1b
alkbh4	slc4a2b	rgmd	ldb3a
osgn1	zgc:174931	nudt3b	vsx1
aspa	hnf1a	si:dkey-4e7.3	stk31
aplnra	scrib	elmo3	szrd1
zgc:171489	higd2a	fpgt	ifi30
slc4a2b	BX927391.1	mier3b	irf8
zgc:174931	mgat2	myo6b	fdx1
hnf1a	ankrd12	nr1h4	usp1
higd2a	syngr2a	si:dkey-46a10.3	smim7
BX927391.1	rhpn1	paplnb	lhfpl5b
mgat2	porcnl	tmem243a	tmub2
ankrd12	dusp10	efnb3b	ikzf5
syngr2a	pcdh18b	ca4b	rad52
hspb2	stx4	chrac1	tango2
rhpn1	nitr13	lpar2a	ccz1
porcnl	aplnr2	si:dkeyp-55f12.3	rpgra
pcdh18b	tnmd	cldnk	ndufs6
stx4	ca10a	zgc:103681	cdyl
nitr13	fermt1	odf3b	hdac9b
aplnr2	sept7b	si:ch211-251j10.3	angptl5
tnmd	bdh2	nup205	fhl1b
ca10a	fam172a	gstt1a	cd99l2
fermt1	SLC9B2	glod4	slc6a19b
sept7b	smpd2b	acot20	vars2
fam172a	grinab	unga	raraa
SLC9B2	gria2b	gnat2	laynb
ankrd31	opn3	actc1a	usp30
grinab	dlg3	taf1b	pcolcea
gria2b	smcr8a	slc38a5a	emg1
zfyve21	runx3	tpd52l1	tpte
runx3	znf598	CABZ01088025.1	dpm1
znf598	ppifb	dym	rexo1
golph3	htt	tnni1c	kcnk12l
CU550714.1	golph3	gstr	alox5a
zgc:165423	gabrp	nhsl1b	pbdc1
acsl3b	ankrd2	nrn1b	tut1
rnft2	zgc:165423	serpinc1	arhgap36
RTKN	si:ch211-202f3.3	hapln1b	nox1
thada	acsl3b	s1pr1	trim62
pkib	rnft2	ptpn1	smyd4
carhsp1	RTKN	exo5	rpusd2
si:dkey-148a17.6	pkib	grb7	wnk1a
pcp4a	carhsp1	cebpb	igl4v8
b3gnt7l	si:dkey-148a17.6	stx6	dapk2a
lrrc47	pcp4a	riok3	zfp64
amn1	b3gnt7l	git2b	cbx5
zgc:113377	lrrc47	yy1a	acsf2
pttg1	amn1	AL954822.5	eif4g3b
cttnbp2nla	zgc:113377	nfe2l2a	eif4g1a
mtor	pttg1	egr2b	lmln
zgc:113886	cttnbp2nla	tfdp2	lss
asb5b	zgc:113886	atp1b3b	kcnc4
tssc4	mtor	disp2	smap2
si:dkey-16p6.4	asb5b	si:ch211-163l21.8	mrps9
zgc:113090	tssc4	rpl10a	st14b
eef1a1b	si:dkey-16p6.4	hsh2d	arvcfb
eif3jb	zgc:113090	mfng	slc25a17
sfxn2	zgc:113372	zgc:100920	qpctla
sord	insm1b	gng8	raph1b
pop5	eef1a1b	cyp2p8	washc4
aqp9b	lrrc6	gcga	mast3a
srsf5b	eif3jb	fam43a	bmp10
zgc:113054	sfxn2	slc26a11	kcnh4b
si:ch73-22a13.3	sord	capn3b	dot1l
enpp7.1	pop5	MMP23B	acacb
kctd12.2	gdf6a	grp	mpnd
f9a	zgc:113054	alox5b.1	cpox
tspan3b	si:ch73-22a13.3	pomca	casp2
usp11	fbxo22	ccnb1	slc12a7b
htr1fb	cryaa	esr2b	ctdspla
sra1	adhfe1	rnasel2	cyp4v8
ebi3	kctd12.2	LO017829.1	ranbp10
tmtops3a	f9a	prrg1	fam133b
ndufaf6	tspan3b	atg101	ripor1
foxb1b	rfc4	rell2	cacnb4b
myb	adob	gtf3c6	dcbld2
eprs	usp11	ccdc6a	kif14
gtf2a2	htr1fb	abraxas1	fam234b
maea	creb1a	ackr3b	sema4ab
ghrhrb	sra1	rpp21	nlgn3b
cldn17	ebi3	plpp6	ctnnd2b
dcdc2b	foxb1b	jun	pias1b
CABZ01084566.1	gtf2a2	depdc7b	pgap1
zgc:172065	maea	elovl6l	sin3b
crlf3	cldn17	egfl6	hhipl1
cbln5	dcdc2b	zgc:123305	si:ch73-196l6.5
hnrnpc	CABZ01084566.1	zgc:153704	parp9
scel	zgc:172065	pde12	ASTE1
MBL2	hnrnpc	sh3gl2b	lpar6a
pax9	ftr76	TMCC1	kif5ab
ei24	scel	cacng6b	npffr1l2
ism2b	MBL2	mmp15a	zgc:153018
crip1	pax9	si:ch211-215a10.4	ydjc
inpp5l	ism2b	abcf1	gpnmb
crtc1b	crip1	stx3a	nkain4
tmem62	inpp5l	cav2	ccdc126
srfa	crtc1b	tspan1	tmem264
lin37	tmem62	tcf12	si:dkey-57a22.15
fetub	srfa	cxcr1	aifm3
chmp2a	lin37	CCKAR	snx21
gpank1	chmp2a	agxta	spata13
ppp1r2	gpank1	dtymk	arhgap21b
irs1	ppp1r2	zgc:114041	mrs2
rbm41	mustn1a	adamtsl5	ppp1r9bb
tmem30b	zgc:171779	accs	pgap3
ccdc105	irs1	olfm1a	atp8a1
nmbr	rbm41	slc35d1a	ntrk3a
btr06	tmem30b	si:ch211-236k19.2	ubn2a
mrps17	ccdc105	uap1	gusb
ltb4r2b	nmbr	zgc:171711	dock3
pgrmc1	txlnba	rbfox2	pcloa
slc38a8b	btr06	rcvrna	peli1b
phkg2	mrps17	aff2	creb3l2
fbxl8	ltb4r2b	alkbh4	atp2b3a
yars2	pgrmc1	osgn1	limk2
zgc:77151	valopb	aspa	tead3b
kti12	slc38a8b	aplnra	spi1b
stk33	phkg2	slc4a2b	robo1
rpe65b	st8sia7.1	zgc:174931	SLC6A13
si:zfos-464b6.2	fbxl8	hnf1a	puraa
rtn1a	cog4	scrib	lhcgr
si:ch211-198n5.11	yars2	higd2a	cep57
yipf6	zgc:77151	BX927391.1	card9
slmapa	kti12	mgat2	snapc4
araf	stk33	asna1	mbnl2
lrp10	rpe65b	ankrd12	csk
imp4	rtn1a	syngr2a	viml
smg1	rnf40	hspb2	nitr2b
znhit1	si:ch211-198n5.11	rhpn1	sirt1
cnot6l	greb1	dusp10	tcnba
coro1a	yipf6	pcdh18b	ftr14
cldni	araf	stx4	slc39a6
fli1a	lrp10	itga6l	arrdc1a
si:dkey-51d8.1	imp4	nitr13	nmba
pgpep1	smg1	lig3	trib2
adra2db	znhit1	aplnr2	spg7
lmo4b	cnot6l	tnmd	ube2d4
pax2a	coro1a	ca10a	cdh15
emc10	cldni	fermt1	ptk7a
faah2b	fli1a	sept7b	oclnb
plcxd3	si:dkey-51d8.1	fam172a	erap1b
tbc1d17	pgpep1	SLC9B2	mbl2
id3	adra2db	ankrd31	bicra
nucb1	lmo4b	grinab	vamp5
trappc8	emc10	gria2b	csf1b
bcat2	btr09	zfyve21	grhpra
pdk4	plcxd3	smcr8a	cntn5
asap1a	nucb1	runx3	camk2b1
six2b	trappc8	znf598	lamc2
six3b	bcat2	ppifb	cacybp
tnn	pdk4	htt	pbx3b
mta3	CSKMT	golph3	slc6a9
ppp2r5b	asap1a	ankrd2	prpf4ba
zgc:101765	six2b	CU550714.1	neurod6a
badb	six3b	zgc:165423	vaspb
mc5rb	tnn	acsl3b	vgll4l
tor4ab	mta3	rnft2	wbp2
cxcr2	myo1b	RTKN	dock8
pomt2	cox7a2l	thada	lrfn1
depdc7a	ppp2r5b	pkib	gpx4a
bcl9l	zgc:101765	carhsp1	ncf2
borcs7	badb	si:dkey-148a17.6	v2rh14
pora	mc5rb	pcp4a	taar19q
myhc4	mc2r	b3gnt7l	ilkap
cyp27a1.4	tor4ab	lrrc47	tcf7l1a
slc7a7	cxcr2	zgc:113377	cnot11
ncs1a	bcl9l	pttg1	cebpz
si:ch211-132b12.8	borcs7	cttnbp2nla	rab8b
snap23.2	rbm4.2	mtor	lpar5b
pitpnm3	pora	zgc:113886	taf10
si:ch1073-358c10.1	myhc4	tssc4	dnlz
mpeg1.1	cyp27a1.4	si:dkey-16p6.4	nlrc9
cyb561d1	slc7a7	zgc:113090	kctd4
leo1	ncs1a	zgc:113372	fam174b
si:dkey-25e12.3	si:ch211-132b12.8	insm1b	crfb4
bambia	snap23.2	eef1a1b	spry4
foxq1b	si:ch1073-358c10.1	eif3jb	myh7
serpinb1	mpeg1.1	sfxn2	spout1
hmox2a	cyb561d1	sord	map4l
vps26bl	atp2b1a	pop5	gpr137bb
METTL21C	leo1	aqp9b	mespab
slc22a15	si:dkey-25e12.3	srsf5b	pimr149
cyp26c1	bambia	zgc:113054	tspan13a
or136-1	zp2l1	si:ch73-22a13.3	arpc2
lrit3a	foxq1b	cryaa	rad51c
cmn	serpinb1	adhfe1	arntl2
otub1a	hmox2a	enpp7.1	slc17a6b
grk7b	vps26bl	kctd12.2	wnt11r
sertad2b	METTL21C	f9a	atp5meb
appb	slc22a15	tspan3b	ms4a17a.16
celf2	cyp26c1	rfc4	psmb10
cgna	cmn	usp11	prdx4
prex1	pfkfb4a	htr1fb	tmem184ba
aclyb	otub1a	creb1a	adcy1a
spire1a	sertad2b	sra1	pak6b
zbtb2b	appb	ebi3	chtf8
vps53	epdl2	ndufaf6	nufip2
timm8b	c1galt1b	foxb1b	cry3a
vps26a	exoc2	myb	ikzf2
fosb	cgna	eprs	kcnh5b
suv39h1b	poldip2	gtf2a2	ppp2r5eb
zdhhc4	ruvbl2	maea	esrrgb
dffa	prex1	ghrhrb	phf3
bricd5	aclyb	cldn17	mstnb
prss23	f5	dcdc2b	pex11b
foxo4	spire1a	CABZ01084566.1	rit1
dclk2a	akap12b	crlf3	slc7a9
vtg7	vps53	cbln5	bmp2b
mgrn1b	timm8b	hnrnpc	ebf1b
zmp:0000001175	ino80c	ftr76	ftr01
rsl1d1	vps26a	scel	taar14i
cpe	foxp3a	MBL2	pdia5
tex10	fosb	pax9	pcdh1a4
luc7l	zdhhc4	ei24	tle3a
si:ch1073-416j23.1	dffa	ism2b	erich3
eve1	bricd5	crip1	gabpa
hoxb13a	foxo4	inpp5l	bida
tprg1	dclk2a	crtc1b	ahsg2
pip4p2	vtg7	tmem62	upf3a
capza1b	mgrn1b	srfa	acot17
eef1g	mtnr1bb	lin37	mus81
ecrg4a	zmp:0000001175	fetub	rps24
kin	kcnc3a	chmp2a	fam3c
kcnd3	nr4a3	gpank1	ppp3r1b
gtf2h5	rsl1d1	ppp1r2	proca
sptbn4b	tex10	mustn1a	grpel2
mtg1	dmc1	irs1	slc26a3.2
coq10b	zgc:153215	rbm41	hsbp1a
npdc1b	luc7l	tmem30b	slbp2
si:ch211-201h21.5	nipa1	ccdc105	dbh
hsp70.1	si:ch1073-416j23.1	nmbr	alox12
vps37a	tspan14	txlnba	khdrbs2
add3b	gzm3	btr06	slc13a3
a2ml	eve1	mrps17	tmem223
drd7	pip4p2	ltb4r2b	sumf2
ldb3a	l3mbtl2	slc38a8b	phkg1b
znf706	slc4a1b	phkg2	syt1b
lim2.1	capza1b	st8sia7.1	kif13a
zgc:123295	eef1g	fbxl8	palm2
szrd1	ecrg4a	lmx1bb	ckmt2a
dlg3	uxs1	cog4	mrps18c
ifi30	kin	yars2	asap2b
tmem222a	gtf2h5	zgc:77151	adra2c
dusp22a	polr2gl	kti12	tyw5
fdx1	sptbn4b	stk33	her8.2
afap1l1b	mtg1	rpe65b	prmt6
lhfpl5b	coq10b	si:zfos-464b6.2	calr
tmub2	npdc1b	rtn1a	map4k3a
si:ch211-208g24.8	abcb9	si:ch211-198n5.11	nitr6a
ikzf5	camk2g2	yipf6	dhx40
si:ch73-113g13.2	hsp70.1	slmapa	tcea1
rap1gap	vps37a	araf	proca1
cpamd8	zgc:110591	lrp10	mrpl30
nutf2	a2ml	imp4	lipt2
asb11	BX510938.1	smg1	sox1a
ndufs6	ldb3a	cnot6l	kpna5
cdyl	tom1l2	coro1a	afap1l2
arhgap42a	znf706	cldni	jac7
grpr	lim2.1	fli1a	cnot3a
angptl5	zgc:123295	si:dkey-51d8.1	bcor
ext2	szrd1	pgpep1	tpt1
chaf1b	mpv17l2	adra2db	zgc:174193
dnaaf3l	ifi30	lmo4b	schip1
vars2	tmem222a	pax2a	aamp
pskh1	dusp22a	emc10	ska3
utp3	irf8	faah2b	popdc2
tmeff1b	fdx1	btr09	arl13b
bcas3	afap1l1b	plcxd3	ppap2d
manba	lhfpl5b	id3	tdp2a
zgc:163079	si:ch211-208g24.8	nucb1	p2ry12
CU571315.1	ikzf5	trappc8	pdpk1a
raraa	si:ch73-113g13.2	bcat2	sptan1
zgc:123297	rap1gap	pdk4	ftr86
laynb	cpamd8	asap1a	lingo2b
usp30	si:ch211-214j8.1	six2b	adh8a
gabra2a	nutf2	six3b	cd28
lygl1	gucy1b2	mta3	pspc1
pcolcea	asb11	cox7a2l	igf2bp2a
emg1	rtn1b	ppp2r5b	tmem41aa
dbr1	rpgra	zgc:101765	nop56
ankk1	ndufs6	badb	ehhadh
or125-8	cdyl	mc5rb	psip1b
tpte	arhgap42a	mc2r	clasp1a
dpm1	grpr	tor4ab	hnrnpl2
chrna2b	angptl5	cxcr2	rgs4
rad21l1	ext2	pomt2	stt3b
zgc:174164	zgc:113276	depdc7a	actr2b
tvp23b	chaf1b	bcl9l	tor3a
zmp:0000001103	dnaaf3l	borcs7	snrpa1
htr1ab	cd99l2	pora	camsap1a
nle1	slc6a19b	myhc4	plcd3a
hpf1	vars2	cyp27a1.4	nmt1a
zgc:110045	pskh1	slc7a7	tnfaip8l2a
sclt1	utp3	ncs1a	tnnt2a
rorca	fhad1	si:ch211-132b12.8	dlx6a
tnfsf10	tmeff1b	snap23.2	zak
alox5a	bcas3	pitpnm3	p3h1
elovl8b	zgc:163079	si:ch1073-358c10.1	pdhx
ppp3ccb	lrp2b	mpeg1.1	scube3
nox1	plch2b	cyb561d1	cdk6
kcnab2b	CU571315.1	atp2b1a	aldh1l2
NCKAP1L	raraa	leo1	dmd
irge4	zgc:123297	si:dkey-25e12.3	tnnt3b
rnf217	ryk	bambia	hoxc4a
smyd4	laynb	zp2l1	hoxc8a
zgc:154077	si:ch211-125o16.4	foxq1b	hoxc13a
rpusd2	usp30	serpinb1	cx30.9
si:dkeyp-27c8.1	gabra2a	hmox2a	bcam
wnk1a	lygl1	vps26bl	apoa4b.2
dpagt1	pcolcea	METTL21C	flad1
igl4v8	dbr1	slc22a15	mala
dapk2a	ankk1	cyp26c1	scaper
acsf2	or125-8	or136-1	chac1
grid1a	dpm1	lrit3a	grasp
hspa12b	chrna2b	cmn	rsph3
eif4g1a	rexo1	otub1a	lactbl1b
ago2	rad21l1	grk7b	mybpc2a
mark4a	zgc:174164	appb	arf5
zgc:153240	htr1ab	epdl2	pdgfra
lmln	nle1	celf2	wasla
kcnc4	zgc:110045	c1galt1b	dachb
zgc:113232	sclt1	exoc2	tdp2b
tfpi2	plcd3b	cgna	idh3a
bcl11aa	rorca	ruvbl2	mafbb
cog7	tnfsf10	prex1	pak6a
dipk1ab	alox5a	aclyb	ano10b
hepacam2	elovl8b	spire1a	eno4
efcab1	ppp3ccb	vps53	mrpl36
col6a2	arhgap36	timm8b	atat1
smap2	nox1	ino80c	zbtb12.2
ugt5c2	NCKAP1L	vps26a	magi1b
mrps9	trim62	fosb	rhol
ano6	irge4	suv39h1b	crip2
esr1	rnf217	zdhhc4	slc2a9l1
unc5db	zgc:154077	dffa	ttll3
tmem246	rpusd2	bricd5	scn4ab
gon4l	si:dkeyp-27c8.1	foxo4	dtnbp1b
myo9b	wnk1a	dclk2a	cdh4
dcakd	dpagt1	vtg7	nxph3
CABZ01055347.1	nfasca	mgrn1b	slc25a18
nrxn1a	igl4v8	zmp:0000001175	foxg1a
si:ch73-334d15.1	dapk2a	kcnc3a	znf516
arvcfb	zfp64	rsl1d1	pde4cb
slc25a17	slc6a4b	cpe	tnnt2e
qpctla	cbx5	tex10	lin52
raph1b	fam102ba	zgc:153215	rlbp1b
washc4	grid1a	zgc:154093	abhd6b
mast3a	hspa12b	luc7l	snx9a
hnrnpm	eif4g1a	vtg2	cox4i2
ahnak	eif4g3b	si:ch1073-416j23.1	ints8
bmp10	cbln4	pecr	sox2
si:dkey-208k22.6	ago2	gzm3	tsen2
wscd2	mark4a	eve1	hcrt
col15a1b	zgc:153240	hoxb13a	camk1da
lman2	whrnb	pip4p2	ambra1b
iqub	lmln	capza1b	pfn2
commd4	kcnc4	eef1g	pcbp4
lingo3a	oca2	ecrg4a	abhd12
kcnh4b	zgc:113232	kin	pcgf5a
tbc1d2b	tfpi2	kcnd3	asic4b
dot1l	bcl11aa	gtf2h5	ptena
acacb	dipk1ab	polr2gl	pnkd
mpnd	hepacam2	sptbn4b	pimr98
ehbp1l1b	efcab1	mtg1	hps5
casp2	col6a2	coq10b	pthlhb
tkfc	smap2	npdc1b	p4ha1b
ctdspla	ugt5c2	abcb9	sulf2b
cyp4v8	si:ch211-132b12.1	camk2g2	cyt1l
ranbp10	u2surp	hsp70.1	krt92
fam133b	ano6	vps37a	ppp1r13ba
cacnb4b	gon4l	zgc:110591	pdgfaa
dcbld2	myo9b	a2ml	capn1b
bmt2	ank3a	drd7	sptssa
kif14	dcakd	ldb3a	illr3
fam234b	CABZ01055347.1	tom1l2	khk
nfs1	nrxn1a	znf706	trim25l
adipoqa	si:ch73-334d15.1	lim2.1	ncoa6
znf362b	slc25a17	zgc:123295	utrn
arhgap17b	raph1b	szrd1	samhd1
edc4	washc4	dlg3	tbc1d2
jarid2b	cytip	ifi30	runx2a
fan1	mast3a	tmem222a	morn2
slc8a1b	hnrnpm	dusp22a	rom1b
cacna1bb	cnot2	fdx1	pcdh1b
arhgap15	ahnak	usp1	ptprc
sema4ab	bmp10	smim7	mrpl54
nrd1b	jam3b	afap1l1b	cldn11b
bcl2l13	wscd2	lhfpl5b	mbtps2
nlgn3b	lman2	tmub2	pvalb9
ndst1a	iqub	si:ch211-208g24.8	gabrb1
nfia	git2a	ikzf5	ndufs2
pias1b	srgap1a	si:ch73-113g13.2	cited1
pgap1	commd4	rap1gap	si:dkey-1h24.2
sin3b	lingo3a	cpamd8	sema4bb
si:ch211-147g22.4	kcnh4b	nutf2	loxl3b
fam19a4b	tbc1d2b	gucy1b2	anapc1
si:ch73-196l6.5	dot1l	asb11	spen
ASTE1	acacb	rtn1b	csnk2b
lpar6a	mpnd	rpgra	ubap2a
kif5ab	casp2	ndufs6	fer1l4
arhgap35a	slc12a7b	cdyl	gask1a
pleca	ctdspla	ptenb	arf1
duox	cyp4v8	arhgap42a	spoplb
kcnj12b	fam133b	grpr	sbf1
npffr1l2	ripor1	ext2	nol7
zgc:153018	cacnb4b	zgc:113276	golga4
ydjc	dcbld2	sp8b	nudt19
ccdc126	bmt2	abcb8	il13
tmem264	kif14	chaf1b	fbxl14a
si:dkey-57a22.15	fam234b	dnaaf3l	adgre5b.3
aifm3	nfs1	slc6a19b	cdh16
abcb7	adipoqa	vars2	gmps
spata13	arhgap17b	pskh1	snphb
arhgap21b	edc4	utp3	cby1
mrs2	sik2b	fhad1	baz2ba
ppp1r9bb	cacna1bb	tmeff1b	dpp4
cmip	arhgap15	bcas3	sept8a
pgap3	sema4ab	manba	vtcn1
meak7	nrd1b	zgc:163079	gramd1ba
zgc:158785	nlgn3b	CU571315.1	rnd1b
fam45a	ndst1a	raraa	evi5a
sdhaf2	pias1b	zgc:123297	zgc:153659
atp8a1	pgap1	laynb	fthl27
ccdc151	sin3b	usp30	dna2
alkbh5	stra6l	gabra2a	mmrn2b
ago3b	si:ch211-147g22.4	lygl1	dicer1
gtf3c5	fam19a4b	pcolcea	zmat3
ubn2a	si:dkey-6n6.1	emg1	taar19p
abcg5	hhipl1	dbr1	sun1
si:ch73-160i9.2	si:ch73-196l6.5	ankk1	letm1
gusb	ASTE1	or125-8	man1b1b
mapk8ip2	lpar6a	tpte	ppfia3
chkb	kif5ab	dpm1	nr4a2a
dock3	arhgap35a	chrna2b	ccl44
si:ch211-220f12.4	si:ch211-210g13.5	rexo1	tp53bp1
ubap2l	pleca	rad21l1	oxgr1a.2
mtif2	duox	zgc:174164	abhd15a
ttc13	kcnj12b	tvp23b	frmpd3
msh3	zgc:153018	zmp:0000001103	dhrsx
pcdh9	ydjc	htr1ab	lmtk2
oxr1b	ccdc126	nle1	abhd8b
pcloa	tmem264	hpf1	sox11a
ptprt	si:dkey-57a22.15	zgc:110045	vav3b
ptprk	aifm3	sclt1	gas1a
si:ch211-1e14.1	snx21	rorca	taf4a
GPR45	abcb7	tnfsf10	radil
si:dkeyp-74b6.2	si:ch73-22o12.1	alox5a	kcnc2
rbpjb	spata13	elovl8b	duox2
cenpe	arhgap21b	ppp3ccb	yme1l1a
LO018340.1	mrs2	arhgap36	ccl27b
trpm4b.2	pgap3	nox1	pou3f2a
si:dkey-32n7.7	zgc:158785	NCKAP1L	slc29a3
cdk4	fam45a	trim62	zbtb11
elmo2	sdhaf2	rnf217	klf4
bbs4	atp8a1	smyd4	cyp26b1
zgc:153913	ccdc151	zgc:154077	znf1059
rlf	alkbh5	wnk1a	adcy3a
peli1b	fam78ba	dpagt1	zbtb22b
creb3l2	gtf3c5	igl4v8	fthl29
syt7a	ubn2a	zfp64	frmd5
DGKI	mapk8ip2	abcc5	cerkl
bud23	dock3	grid1a	tmem125b
coro2bb	si:ch211-220f12.4	hspa12b	wdhd1
antxr1c	ubap2l	eif4g1a	klb
si:ch211-220f12.1	mtif2	eif4g3b	ybx1
tead3b	ttc13	tuft1a	znf219
spi1b	msh3	ago2	kri1
atp23	pcdh9	mark4a	zdhhc1
nrm	ssuh2rs1	zgc:153240	cdh26.1
celf5a	pcloa	whrnb	mgaa
cdk12	ptprt	lmln	abhd16a
mt-nd2	ptprk	kcnc4	col6a1
mt-atp6	rbpjb	oca2	tmem41b
mt-nd3	cenpe	zgc:113232	ncoa3
mt-nd5	atp2b3b	tfpi2	wnt6b
robo1	si:dkey-32n7.7	bcl11aa	rbm46
si:ch211-193c2.2	cdk4	cog7	cox15
gtf2h3	abcg1	dipk1ab	tiam1a
aldh2.2	elmo2	hepacam2	rsad1
kiss1rb	zgc:153913	efcab1	fam83b
SLC6A13	rlf	col6a2	ttc19
puraa	peli1b	smap2	myo18aa
rsph4a	creb3l2	ugt5c2	mon1a
rasa4	syt7a	mrps9	alpk3a
lhcgr	DGKI	ano6	fhit
snapc4	ppp1r9ala	esr1	inka2
sp4	si:ch211-160o17.4	unc5db	nkx2.4a
si:ch211-149a19.3	coro2bb	tmem246	kcnip2
arid3c	atp2b3a	ctdspl2a	ppp2r3a
ubb	si:ch211-220f12.1	gon4l	cnksr2b
mob1ba	tead3b	myo9b	txnrd2.2
ifngr2	spi1b	ank3a	castor1
CABZ01060891.1	nrm	dcakd	lats2
nmrk2	celf5a	CABZ01055347.1	boc
gucy2d	cdk12	nrxn1a	chl1a
MAN1C1	mt-nd2	si:ch73-334d15.1	hspg2
zgc:171452	mt-atp6	arvcfb	epoa
mbnl2	mt-nd3	slc25a17	prune
viml	mt-nd5	qpctla	depdc5
nitr2b	robo1	raph1b	chpfb
sirt1	gtf2h3	washc4	peak1
wbp4	kiss1rb	cytip	pdp1
f11r.2	SLC6A13	mast3a	cadm1a
nppc	puraa	hnrnpm	mhc2dab
tnfsf11	rasa4	ahnak	pcdh12
arrdc1a	zglp1	bmp10	ttll11
nmba	snapc4	wscd2	dab1b
si:dkey-51d8.3	sp4	col15a1b	qsox2
ubl7b	si:ch211-149a19.3	lman2	agtrap
dpep1	ubb	iqub	luzp2
ube2d4	si:ch211-194e1.7	commd4	rfx7a
cdh15	zmp:0000001127	canx	treh
erap1b	CABZ01060891.1	lingo3a	taar13e
mbl2	gucy2d	kcnh4b	mterf2
bicra	MAN1C1	tbc1d2b	mtpap
zgc:154046	cfap299	dot1l	lmf2a
golga1	ltb4r2a	acacb	fbxo21
si:ch211-195b13.6	zgc:171452	mpnd	sema4ga
si:ch211-151h10.2	per2	cpox	pdgfd
lrch4	apeh	casp2	gdpd2
pros1	viml	slc12a7b	hdac5
vamp5	sirt1	tkfc	myo19
cntn5	ftr83	ctdspla	eif3s10
panx2	wbp4	cyp4v8	pcdh7a
camk2b1	f11r.2	ranbp10	bcorl1
si:ch211-203b8.6	nppc	fam133b	wdr37
GRB14	ppp1r15b	ripor1	plxnb1a
nrg2a	tnfsf11	cacnb4b	shroom4
lamc2	slc39a6	dcbld2	fbxo10
cacybp	arrdc1a	bmt2	zmp:0000000735
mrps14	si:dkey-51d8.3	mrps5	sgpl1
pbx3b	ubl7b	adipoqa	polr2k
lmx1al	ing5b	znf362b	slc26a10
slc6a9	trib2	arhgap17b	tmem65
prpf4ba	ube2d4	edc4	AL935210.1
vaspb	cdh15	jarid2b	hapln1a
cpeb1b	ptk7a	fan1	ccdc83
tns2b	oclnb	slc8a1b	pmch
wbp2	fzd10	sik2b	evi5b
ttc9b	erap1b	sik2a	fhdc1
capn12	bicra	arhgap15	mbnl3
gucd1	zgc:154046	sema4ab	pcdhb
plscr3b	golga1	nrd1b	acer2
lrfn1	si:ch211-195b13.6	bcl2l13	loxl5a
zgc:136254	si:ch211-151h10.2	ndst1a	pctp
gpx4a	adam28	pias1b	raver2
cyp2y3	rell1	pgap1	kdm2ab
gbgt1l4	rwdd	sin3b	arfgef2
BX649633.1	lrch4	si:ch211-147g22.4	mafb
arl8	csf1b	fam19a4b	tpx2
ncf2	cntn5	si:dkey-6n6.1	taf9
v2rh14	panx2	hhipl1	esco1
taar19q	camk2b1	si:ch73-196l6.5	prdm2b
taar19u	si:ch211-203b8.6	ASTE1	sp2
si:ch211-203b20.4	cyp2x10.2	lpar6a	usp20
ilkap	nrg2a	kif5ab	ccdc120
rabggtb	lamc2	arhgap35a	nol8
vimr1	cacybp	pleca	sgce
cyp46a1.4	mrps14	duox	cdc123
mhc2dbb	sema6dl	kcnj12b	adgrb1a
dalrd3	pbx3b	npffr1l2	ptger4c
si:ch211-181d7.3	lmx1al	zgc:153018	calhm3
cebpz	slc6a9	ydjc	stx10
lpar5b	prpf4ba	gpnmb	pi4kb
dnlz	vaspb	ccdc126	rbm4.2
aacs	tns2b	tmem264	apcdd1l
nlrc9	vgll4l	si:dkey-57a22.15	crlf1a
lyst	wbp2	aifm3	zfhx4
kctd4	znf507	abcb7	tanc2a
fam174b	capn12	spata13	gas2l1
si:ch211-13k12.2	plscr3b	arhgap21b	palm3
spry4	dock8	eea1	map2
myh7	lrfn1	mrs2	gpr37a
spout1	fancc	ppp1r9bb	ntn2
CR384085.1	zgc:136254	cmip	cnnm2b
map4l	zgc:112356	pgap3	arpc5lb
si:ch211-244o22.2	si:dkey-94e7.2	zgc:158785	megf6a
gpr137bb	si:ch73-189n23.1	fam45a	cavin1a
mespab	jph1b	sdhaf2	slc31a2
zgc:162945	gbgt1l4	atp8a1	acadsb
slc6a17	arl8	ccdc151	slc22a31
adam10a	ncf2	alkbh5	chrne
zgc:55413	v2rh14	fam78ba	syt6a
bloc1s3	taar19q	ago3b	tcima
fam129ab	taar19u	ubn2a	kcnh6b
si:ch211-163l21.10	si:ch211-203b20.4	abcg5	akap1b
gbp4	rabggtb	gusb	znf526
lrrfip2	vimr1	mapk8ip2	obsl1b
il2rga	tcf7l1a	chkb	phkb
f2rl1.1	mhc2dbb	si:ch211-220f12.4	spc25
si:dkey-98f17.3	dalrd3	ubap2l	scg2b
si:ch211-250m6.7	si:ch211-181d7.3	mtif2	tjp1b
ccdc22	cebpz	ttc13	brip1
tspan13a	rab8b	msh3	vps13c
sostdc1a	lpar5b	pcdh9	tmem175
map2k2b	si:dkey-24p1.6	oxr1b	dhx32a
rad51c	dnlz	pcloa	ap5s1
mep1b	crfb1	ptprt	atf5b
slc17a6b	nlrc9	ptprk	fads2
xaf1	lyst	si:ch211-1e14.1	sp8b
syf2	kctd4	GPR45	psda
zgc:153372	fam174b	si:dkeyp-74b6.2	pelp1
si:ch211-261n11.7	si:ch211-13k12.2	rbpjb	sox10
zgc:153759	myh7	cenpe	wasf2
glo1	spout1	LO018340.1	polg2
si:ch211-147a11.3	CR384085.1	trpm4b.2	msl1a
prdx4	map4l	si:dkey-32n7.7	ttc38
si:ch211-283g2.2	si:ch211-244o22.2	abcg1	tspan31
skor1a	gpr137bb	elmo2	prok1
si:ch211-242e8.1	zgc:162945	zgc:153913	arhgap18
dpydb	mrpl44	peli1b	tapt1a
serpinf1	si:dkey-265c15.6	syt7a	nav1b
ces2	BX548044.1	si:ch211-160o17.4	adamts17
mfap4	adam10a	coro2bb	mylk5
actn1	zgc:55413	antxr1c	kcnq2a
cry3a	fam129ab	si:ch211-220f12.1	hnrnpul1l
zgc:91860	dclre1b	tead3b	matk
col2a1a	si:ch211-163l21.10	zgc:153642	kcnt1
zgc:110348	gbp4	spi1b	gpx4b
aldh9a1a.2	lrrfip2	atp23	cop1
crybb1l3	il2rga	nrm	ggnbp2
si:dkeyp-82a1.4	f2rl1.1	celf5a	doc2a
sssca1	mllt1b	cdk12	vps39
ikzf2	nap1l4b	osbpl6	ppp1r37
timm10	fance	mt-nd2	mtx1a
kcnh5b	si:ch211-250m6.7	mt-atp6	rabl6a
ppp2r5eb	tspan13a	mt-nd3	apoeb
si:dkey-59p5.2	mrpl14	mt-nd4	kcnj16
esrrgb	mybpc3	mt-nd5	cipcb
ankar	sostdc1a	robo1	slc41a2b
phf3	map2k2b	gtf2h3	tmco4
mstnb	mep1b	aldh2.2	slc45a3
ppp1r15a	arntl2	kiss1rb	zgc:193801
pex11b	slc17a6b	SLC6A13	stard5
rit1	wnt11r	puraa	micall1a
bmp2b	xaf1	rsph4a	ntm
zgc:163030	ms4a17a.16	rasa4	zgc:100918
zgc:172120	samsn1a	lhcgr	serpina1
ftr01	syf2	cep57	npb
taar14i	zgc:153372	snapc4	ubr2
c6ast1	si:ch211-261n11.7	sp4	dph2
nexn	zgc:153759	si:ch211-149a19.3	sms
pdia5	glo1	tomm7	stim2a
pcdh1a4	hyou1	arid3c	sox19a
zgc:123181	si:ch211-147a11.3	ubb	wrb
cdc7	dsc2l	mob1ba	wdr89
si:dkeyp-50f7.2	prdx4	ifngr2	casc4
tle3a	tmem184ba	CABZ01060891.1	ftr02
erich3	si:ch211-283g2.2	gucy2d	sypb
wdr35	skor1a	MAN1C1	muc13b
si:dkey-182i3.11	swap70b	cfap299	fyco1b
acot16	pak6b	ltb4r2a	man2b2
ercc8	si:ch211-242e8.1	per2	tlr8b
bida	dpydb	mbnl2	rasgrp3
ahsg2	chtf8	viml	gpr35.1
upf3a	wu:fk65c09	ece2a	adnpb
acot17	serpinf1	sirt1	snx29
cttnbp2	sall3b	wbp4	sugp1
oxa1l	mfap4	ftr14	foxp4
hsd20b2	actn1	f11r.2	brd4
mus81	cry3a	nppc	cep152
si:dkey-12e7.1	zgc:91860	ppp1r15b	rbm25b
fam3c	col2a1a	ch25hl1.2	wdr62
ppp3r1b	zgc:110348	tnfsf11	ascc1
zgc:162608	nemp2	arrdc1a	gpaa1
zgc:172053	zgc:112962	nmba	suds3
mxtx1	crybb1l3	si:dkey-51d8.3	ttll4
chchd1	si:dkeyp-82a1.4	ubl7b	rbm15b
zgc:55558	sssca1	dpep1	malt1
zswim8	ikzf2	ube2d4	cdk13
CU856539.2	si:dkey-59p5.2	cdh15	pik3cb
cx32.2	esrrgb	erap1b	ptcd1
tsga10	ankar	mbl2	pimr198
caprin1a	phf3	bicra	nox5
grpel2	mstnb	golga1	agbl2
nhp2	aars	si:ch211-195b13.6	ralbp1
trdn	map3k7cl	si:ch211-151h10.2	pus10
slc26a3.2	pex11b	adam28	slc5a5
hsbp1a	rit1	rell1	gprc5bb
slbp2	per1a	lrch4	znf148
neurl1aa	slc7a9	pros1	pacs2
dbh	bmp2b	vamp5	nanog
gja5b	zgc:163030	csf1b	flrt1b
ap1s1	ebf1b	cntn5	tmem169b
zgc:92664	ftr01	camk2b1	arhgef16
si:dkey-6n21.13	taar14i	si:ch211-203b8.6	twist2
alox12	taar10	GRB14	ddhd2
khdrbs2	c6ast1	cyp2x10.2	mntb
ghrh	nexn	nrg2a	add2
sumf2	pdia5	lamc2	ppp4cb
phkg1b	pcdh1a4	cacybp	esamb
si:dkey-88e18.2	zgc:123181	mrps14	cdh24a
syt1b	cdc7	sema6dl	pmchl
zgc:153981	si:dkeyp-50f7.2	pbx3b	tmem151bb
si:dkey-238c7.16	tle3a	lmx1al	mrpl47
gtf3c4	ell	slc6a9	birc5a
idh1	erich3	prpf4ba	aifm5
kif13a	wdr35	vaspb	tns1a
zgc:109889	si:dkey-182i3.11	cpeb1b	KCNK12
tat	acot16	tns2b	reps2
chrnb1	ercc8	wbp2	nup214
asap2b	cttnbp2	zgc:162184	adat2
ttll7	oxa1l	capn12	apoc4
adra2c	hsd20b2	plscr3b	plagl2
tyw5	mus81	dock8	ppp1r14c
tmem230b	si:dkey-12e7.1	lrfn1	atp8b4
her8.2	rps24	zgc:136254	rabif
col7a1l	fam3c	gpx4a	cfdp1
lrguk	CR847571.1	si:ch73-189n23.1	mast2
exoc4	zgc:162608	cyp2y3	nudcd2
lgi2b	pard6a	jph1b	arhgap19
zgc:152658	zgc:172053	gbgt1l4	slc9a3r1a
CU639469.1	mxtx1	BX649633.1	rassf6
calr	chchd1	arl8	rimbp2
map4k3a	CU856539.2	ncf2	prph2la
clgn	tsga10	v2rh14	tmed5
sh3bp4	caprin1a	taar19q	golim4b
nitr6a	grpel2	taar19u	pycr3
hbba1	nhp2	si:ch211-203b20.4	podn
slc35f2	slc26a3.2	ilkap	myo7ab
mtmr11	hsbp1a	rabggtb	ppef1
anxa11a	slbp2	vimr1	trmt61a
flot2b	zgc:113293	cyp46a1.4	gabpb2a
zgc:174719	dbh	tcf7l1a	rab2a
si:ch211-106h11.3	gja5b	cnot11	fkbp9
lgals3bpb	ap1s1	mhc2dbb	asic1a
zgc:154058	zgc:92664	dalrd3	chd4a
tcea1	si:dkey-6n21.13	si:ch211-181d7.3	rer1
sstr2b	alox12	cebpz	fgf1a
gpm6ba	khdrbs2	rab8b	rad21a
proca1	phactr2	lpar5b	gtf2f2b
si:ch211-117n7.7	ghrh	dnlz	tfeb
sfxn4	zgc:153169	or104-2	uqcrfs1
crygm2c	sumf2	or105-1	nhlh2
ptpra	phkg1b	crfb1	pfkma
mrpl30	si:dkey-88e18.2	nlrc9	adat3
lipt2	zgc:153981	lyst	pgam1a
txk	bcr	kctd4	zbtb1
rxrba	si:dkey-238c7.16	fam174b	otx2b
afap1l2	gtf3c4	si:ch211-13k12.2	sept5b
cnot3a	idh1	spry4	impdh2
bcor	palm2	myh7	aimp2
gtf2f2a	ckmt2a	spout1	kcna1b
schip1	mrps18c	CR384085.1	smad7
ska3	bach1a	map4l	dnajb6b
cox17	chrnb1	si:ch211-244o22.2	pvalb2
arl13b	asap2b	gpr137bb	slc6a1l
ppap2d	ttll7	mespab	klf1
pdpk1a	adra2c	zgc:162945	neurod1
adh8a	tyw5	mrpl44	ppm1na
cd28	tmem230b	slc6a17	gata5
cspg5a	lrrfip1a	adam10a	mxc
ube2d3	her8.2	zgc:55413	fabp11b
igf2bp2a	pcnp	pimr149	slc1a6
mrpl16	lrguk	h2afva	fev
tmem41aa	exoc4	bloc1s3	ppp1r3cb
nop56	lgi2b	fam129ab	cdc73
ehhadh	efhb	dclre1b	ppp4r4
rbp2a	prom2	si:ch211-163l21.10	mst1rb
zgc:158404	btr21	gbp4	plecb
eny2	prmt6	lrrfip2	dpf2
rgs4	CU639469.1	il2rga	sec31b
zgc:173548	calr	si:dkey-98f17.3	mical3a
cfap36	emsy	si:ch211-250m6.7	rnls
stt3b	clgn	ccdc22	pax6b
llgl1	nitr6a	tspan13a	cpm
lrp8	slc35f2	sostdc1a	ddx39aa
abcb11b	mtmr11	map2k2b	npas2
nbeaa	itgb5	rad51c	nfe2
mettl6	zgc:174719	mep1b	gadd45gb.1
thbs4b	lgals3bpb	arntl2	dbx1b
sytl1	zgc:154058	slc17a6b	ercc4
snrpa1	tcea1	xaf1	ncaldb
ctc1	crygm2d12	atp5meb	her1
stk11ip	zdhhc18a	uckl1b	rgs5b
rpp25l	sstr2b	zgc:136605	memo1
aste1a	gpm6ba	syf2	ttbk2a
plcd3a	crygm2d15	si:ch211-261n11.7	rnf2
magi1a	proca1	zgc:153759	ncl
jtb	si:ch211-117n7.7	si:ch211-147a11.3	snrpc
tnnt2a	crygm2d13	dsc2l	prdm1a
dlx6a	crygm2b	prdx4	tnfb
zp3d.2	sfxn4	si:ch211-283g2.2	pgd
p3h1	crygm2c	skor1a	gsk3b
si:dkey-23a23.2	ptpra	pak6b	pcyt1aa
pdhx	si:dkey-261p22.1	si:ch211-242e8.1	asb14a
nucks1a	nitr1b	dpydb	atp5f1d
scube3	kctd12.1	serpinf1	bmp2a
zgc:86896	mrpl30	mfap4	nacad
aldh1l2	lipt2	nufip2	phc2b
ndrg1a	txk	actn1	sort1a
zgc:158258	kpna5	cry3a	msrb2
sp5a	rxrba	zgc:91860	rpl27
illr4	afap1l2	col2a1a	tcf3a
hnrnpa3	jac7	zgc:110348	fbxo38
spock3	CR392036.1	aldh9a1a.2	ankrd50l
eda	cnot3a	crybb1l3	pgghg
hist1h2a3	bcor	si:dkeyp-82a1.4	uxt
il17ra2	gtf2f2a	sssca1	dnaja1
zgc:162879	schip1	ikzf2	rnf128a
hoxc8a	ska3	timm10	gpia
hoxc11a	cox17	kcnh5b	slc5a9
hoxc13a	ppap2d	ppp2r5eb	fam76b
calcoco1a	tdp2a	si:dkey-59p5.2	ripk1l
cx30.9	pdpk1a	esrrgb	gpx1a
bcam	ftr86	ankar	ppp1caa
apoa4b.2	lingo2b	phf3	crema
ccl35.2	adh8a	mstnb	drg2
si:dkey-96f10.1	cd28	ppp1r15a	gad1a
flad1	pspc1	aars	sept5a
tspan4b	dctn1b	rit1	bhlhe40
bmp8a	igf2bp2a	bmp2b	aldocb
wdyhv1	tmem41aa	zgc:163030	akt2
wdr83os	nop56	zgc:172120	hmgcl
diaph2	ehhadh	ftr01	foxf2a
cd9b	psip1b	taar14i	ccdc191
zgc:153157	clasp1a	c6ast1	aptx
dll4	rbp2a	nexn	nkx6.1
scaper	zgc:162344	pdia5	vsx2
chac1	zgc:153920	pcdh1a4	apoob
s100v1	zgc:158404	zgc:123181	trappc4
fip1l1b	eny2	tle3a	smad1
ociad1	rgs4	wdr35	ap2s1
rsph3	zgc:173548	si:dkey-182i3.11	fmo5
tspan5b	foxg1d	acot16	ddx56
saraf	cfap36	ercc8	ntmt1
gch1	llgl1	bida	chrnb1l
vtg3	zgc:171517	ahsg2	lpar5a
wnt2ba	tor3a	upf3a	tsc1a
mybpc2a	abcb11b	acot17	pkp2
khdrbs1b	zgc:122979	oxa1l	irx5b
pbrm1l	nbeaa	hsd20b2	iscub
ccdc187	mettl6	si:dkey-12e7.1	dctn4
gas2l3	thbs4b	bcl6b	ing3
unm_sa1614	sytl1	fam3c	ccnd3
grna	snrpa1	CR847571.1	tbx5a
dachb	camsap1a	zgc:162608	cd81b
si:dkey-183j2.10	stk11ip	zgc:172053	focad
hdac9b	nfxl1	mxtx1	crx
lgals2a	rpp25l	chchd1	dpp7
si:dkeyp-120h9.1	aste1a	si:dkey-11d18.4	hirip3
idh3a	plcd3a	zgc:55558	trim63a
fbxl18	magi1a	zswim8	rassf1
mafbb	jtb	CU856539.2	rflna
msgn1	tnnt2a	cx32.2	sppl3
kif6	dlx6a	tsga10	jak1
clec16a	zp3d.2	caprin1a	klhl6
fam210aa	p3h1	grpel2	cavin2a
ftr56	si:dkey-23a23.2	nhp2	tuba8l4
mapk3	pdhx	trdn	asic2
srsf6a	nucks1a	slc26a3.2	trmt44
fam131bb	etnk2	hsbp1a	ppp1r14bb
fn1b	aldh1l2	slbp2	tm9sf5
pak6a	ndrg1a	znf1014	tbc1d7
nt5c1ab	zgc:158258	ptgdsa	myf6
ano10b	illr4	neurl1aa	atp11a
slc26a6l	dmd	morc3a	mapk14a
eno4	hnrnpa3	dbh	elavl1a
atp1a1a.3	slc35c2	gja5b	rgs12a
mrpl36	spock3	ap1s1	lyn
zgc:152986	eda	zgc:92664	nuf2
vhl	col8a1a	si:dkey-6n21.13	mtx2
med10	zmp:0000000760	alox12	grb10a
atat1	il17ra2	khdrbs2	clybl
dido1	zgc:162879	ghrh	mapk7
zbtb12.2	BX649282.1	zgc:153169	sepsecs
exoc3l1	hoxc11a	sumf2	cadpsb
cd4-2.2	hoxc13a	phkg1b	tmpoa
rhol	cx39.4	si:dkey-88e18.2	srpk1b
crip2	cx30.9	syt1b	rab1ab
slc2a9l1	bcam	zgc:153981	slc1a4
scn4ab	apoa4b.2	si:dkey-238c7.16	gria3b
dtnbp1b	ccl35.2	si:dkey-30c15.2	pax2b
cdh4	krtcap2	ctnna2	hs1bp3
rims3	si:dkey-96f10.1	idh1	angpt1
ctdsp2	gmds	zgc:109889	irx5a
atf7b	flad1	ckmt2a	tram2
dkk3b	tspan4b	tat	grcc10
twf2b	bmp8a	chrnb1	dip2bb
ncalda	mala	asap2b	acss1
nxph3	wdyhv1	ttll7	cdkl1
zgc:158846	wdr83os	adra2c	gabpb1
zgc:173544	fam206a	tyw5	scg5
btf3l4	zgc:153157	tmem230b	ola1
atxn7l3	dll4	lrrfip1a	vamp1
cnga3a	scaper	her8.2	unc5b
ccr11.1	chac1	pcnp	ikzf1
igsf21b	s100v1	lrguk	plcd1b
foxg1a	grasp	exoc4	cdkn2aip
b3gntl1	fip1l1b	lgi2b	rpl30
krt98	numb	efhb	penkb
znf516	ociad1	prom2	nkd1
tnnt2e	zdhhc17	zgc:152658	bbox1
zgc:136858	elf2b	CU639469.1	gatm
lin52	wu:fi42e03	calr	tmem144b
mxg	rsph3	emsy	nucb2b
atp2b1b	tspan5b	map4k3a	nucb2a
si:dkey-56d12.4	saraf	clgn	ube2ia
zgc:195077	gch1	nitr6a	pcdh20
rbbp9	vtg3	hbba1	hexim1
dnase1l1	wnt2ba	slc35f2	cbr1
si:ch211-262h13.5	si:dkey-13n23.3	mtmr11	cd74b
abhd6b	lactbl1b	itgb5	lsm6
si:dkeyp-93a5.2	mybpc2a	anxa11a	ptger2b
snx9a	ccdc187	zgc:174719	papola
fxr1	unm_sa1614	crygm2f	lgals8a
tsen2	grna	si:ch211-106h11.3	ikzf4
zgc:158296	dachb	lgals3bpb	slc8a4b
tm4sf4	si:dkey-183j2.10	zgc:154058	mtap
igfbp6a	hdac9b	tcea1	rad9a
psmd13	mxa	sstr2b	med28
ccnk	lgals2a	gpm6ba	rgs11
pm20d1.2	idh3a	proca1	ap1s2
styk1a	fbxl18	si:ch211-117n7.7	pmm2
furinb	mafbb	sfxn4	aup1
si:ch211-81a5.8	kif6	crygm2c	polr3k
prim1	clec16a	ptpra	atp5mf
camk1da	fam210aa	si:dkey-261p22.1	prph2a
pbx4	ftr56	mrpl30	cbln14
pfn2	mapk3	lipt2	kpna2
pcbp4	srsf6a	txk	cyc1
pcgf5a	fam131bb	kpna5	slc35b1
asic4b	fn1b	timp2b	pkdccb
tuft1b	zc3h11a	rxrba	tnpo2
cdk5r2a	pak6a	afap1l2	ascl1a
arl6ip6	ggact.3	cnot3a	rpap2
ptena	ano10b	bcor	mrps35
pnkd	eno4	gtf2f2a	acy1
zgc:173570	b4galnt2.2	schip1	cep41
zgc:153722	mrpl36	ska3	tmem53
ccn6	vhl	cox17	klhl20
pimr98	atat1	arl13b	acaa2
naa10	ttpal	ppap2d	dnajb4
g6pd	dido1	pdpk1a	ftr69
hps5	zbtb12.2	bms1	got1
psmb8a	magi1b	adh8a	cacnb1
pthlhb	rhol	cd28	terb2
rccd1	crip2	cspg5a	sfxn3
slc35b4	ttll3	rcn1	as3mt
znf384l	scn4ab	toporsa	mrpl38
rgs7a	dtnbp1b	ube2d3	dync2li1
sulf2b	cdh4	igf2bp2a	gsta.1
si:ch73-367f21.4	sdf4	tmem41aa	lamtor2
eps8l2	atf7b	nop56	gnpnat1
si:dkey-63j12.4	dkk3b	ehhadh	utp11l
alkbh1	nxph3	psip1b	hivep2a
si:dkey-30g5.1	kbtbd8	clasp1a	gpm6aa
cyt1l	zgc:158846	rbp2a	pttg1ipb
krt92	s100v2	zgc:162344	rspo3
si:dkey-28d5.14	btf3l4	zgc:153920	scpep1
pdgfaa	atxn7l3	eny2	nek4
usp40	cnga3a	rgs4	gli3
capn1b	zgc:91850	zgc:173548	hvcn1
sptssa	foxg1a	cfap36	wdfy2
si:ch211-133n4.9	rcor1	stt3b	enpp6
illr3	krt15	pitx3	spc24
lrfn5a	opa1	llgl1	bckdha
emilin1b	krt98	zgc:171517	ccr10
myh9a	znf516	lrp8	ccdc93
ngfa	pde4cb	abcb11b	chchd4b
trim25l	eml1	nbeaa	ntd5
si:zfos-452g4.1	zgc:136858	mettl6	mkrn1
ncoa6	lin52	thbs4b	hsdl1
utrn	mxg	sytl1	cx28.9
si:ch211-226h8.6	si:dkey-56d12.4	snrpa1	tnfrsf19
samhd1	zgc:195077	zgc:103438	sf3a1
edrf1	rbbp9	ctc1	si:ch211-245h14.1
tbc1d2	dnase1l1	stk11ip	ccl38a.4
ddx4	si:ch211-262h13.5	nolc1	brk1
runx2a	si:dkeyp-93a5.2	rpp25l	nr1i2
cirbpb	snx9a	aste1a	tmem198a
si:ch211-212d10.1	fxr1	plcd3a	nudt3b
morn2	slc17a7a	nmt1a	nr1h4
lrrtm2	ints8	magi1a	paplnb
si:ch211-216b21.2	sox2	zmp:0000000634	chrac1
BX511219.1	tsen2	jtb	glod4
rab3gap2	stat3	tnnt2a	slc38a5a
oaz1a	zgc:158296	dlx6a	tnni1c
arl3b	tm4sf4	zp3d.2	wtap
cybc1	igfbp6a	p3h1	exo5
nat9	psmd13	si:dkey-23a23.2	grb7
lrrc59	ccnk	pdhx	atp1b3b
tdo2a	pm20d1.2	nucks1a	atg101
ptprc	chia.6	etnk2	ackr3b
si:dkey-121a9.3	furinb	scube3	plpp6
CU896602.1	si:ch211-81a5.8	zgc:86896	jun
zgc:154125	camk1da	aldh1l2	depdc7b
cdc14ab	ambra1b	ndrg1a	tcf12
mrpl54	pfn2	zgc:158258	adamtsl5
sh3bp4a	pcbp4	sp5a	uap1
lnx2b	pcgf5a	illr4	osgn1
si:dkey-251i10.1	asic4b	cyp2v1	aspa
zgc:152948	tuft1b	hnrnpa3	slc4a2b
fshr	cdk5r2a	spock3	asna1
sult3st5	ptena	eda	hspb2
zic3	pnkd	col8a1a	dusp10
ahr2	zgc:173570	rbbp6	pcdh18b
zmynd11	si:dkey-147f3.8	zmp:0000000760	ca10a
ek1	ccn6	il17ra2	grinab
cldn11b	si:dkey-119m7.4	hoxc11a	opn3
mgat5	pimr98	hoxc13a	acsl3b
krt97	naa10	cx39.4	amn1
krt222	hps5	cx30.9	pttg1
mbtps2	tapbp.1	bcam	tssc4
tusc2b	pthlhb	apoa4b.2	eef1a1b
BX511034.1	p4ha1b	ccl35.2	eif3jb
dhrs7cb	slc35b4	si:dkey-96f10.1	sfxn2
gabrb1	rgs7a	gmds	sord
cited1	sulf2b	flad1	cryaa
rem2	eps8l2	tspan4b	sra1
bicd2	si:dkey-63j12.4	bmp8a	foxb1b
anapc1	alkbh1	mala	eprs
mpz	si:dkey-30g5.1	wdyhv1	ghrhrb
si:dkey-3k24.5	cyt1l	wdr83os	cbln5
sall3a	krt92	diaph2	pax9
lzts2a	ppp1r13ba	cd9b	crip1
zc3h4	si:dkey-28d5.14	zgc:153157	fbl
arf1	pdgfaa	dll4	srfa
c1qtnf7	capn1b	scaper	fetub
mrc2	sptssa	chac1	chmp2a
helq	tmem170b	s100v1	rbm41
si:dkey-46g23.1	illr3	fip1l1b	ccdc105
sbf1	lrfn5a	ociad1	slc38a8b
aspg	zgc:158254	rsph3	lbr
faah	emilin1b	tspan5b	lmx1bb
FO704871.1	khk	saraf	sla1a
dpp4	ngfa	gch1	araf
fgg	trim25l	vtg3	waif2
fgf22	si:zfos-452g4.1	wnt2ba	pax2a
zgc:158234	ncoa6	mybpc2a	faah2b
ppm1g	utrn	khdrbs1b	id3
mical2b	samhd1	pbrm1l	pdk4
slc41a2a	edrf1	ccdc187	six3b
col6a4a	tbc1d2	gas2l3	badb
cpo	snx11	unm_sa1614	cxcr2
nlk1	ddx4	pdgfra	pomt2
mmrn2b	runx2a	grna	id2a
[truncated: 1,549 more rows]

## Sheet: GO of RBPs binding
matched	number	p-value	log-p-value
EF-Hand 1, calcium-binding site	68	8.4e-05	4.07572
Transit peptide	26	0.0038	2.42022
transcription factor activity, sequence-specific DNA binding	117	0.00086	3.0655
Ribonucleoprotein	42	0.00042	3.37675
Myc-type, basic helix-loop-helix (bHLH) domain	37	0.0044	2.35655
RhoGAP	20	0.013	1.88606
Glutathione metabolism	16	0.0085	2.07058
Ion transport	61	0.041	1.38722
Synapse	20	0.022	1.65758
mRNA processing	21	0.069	1.16115
P-type ATPase, A domain	11	0.027	1.56864
convergent
Ribonucleoprotein	39	0.00065	3.18709
EF-hand-like domain	56	0.0057	2.24413
Mitochondrion	51	0.0058	2.23657
Homeodomain	51	0.038	1.42022
Myc-type, basic helix-loop-helix (bHLH) domain	28	0.021	1.67778
RhoGAP	18	0.022	1.65758
glutathione transferase activity	9	0.049	1.3098
Zinc finger, LIM-type	18	0.048	1.31876
Cell junction	38	0.038	1.42022
Ligand-gated ion channel	12	0.041	1.38722
divergent
Myc-type, basic helix-loop-helix (bHLH) domain	39	1.6e-05	4.79588
EF-hand-like domain	65	0.00018	3.74473
Ribonucleoprotein	39	0.0016	2.79588
Glutathione metabolism	16	0.0087	2.06048
Lipid degradation	9	0.034	1.46852
Ion transport	68	0.028	1.55284
Ion channel	46	0.042	1.37675
Cell junction	37	0.045	1.34679
	gdpd5a
	unm_hu7910
	ndufb8
		adgrb3
