# Supplementary material for: The landscape of regulatory genes in brain-wide neuronal phenotypes of a vertebrate brain
Source: eLife. 2021 Dec 13;10:e68224. doi: 10.7554/eLife.68224 (PMC8769648; doi:10.7554/eLife.68224)
Supplement: Figure 5—source data 5. [file elife-68224-fig5-data5.xlsx]

## Sheet: Sheet1
All_RBPs (n = 120)	frequency	paired clusters
arnt2	1	9-61
celf1	1	9-61
dicer1	1	9-61
zfr	1	9-61
nova1	1	9-61
pum1	1	9-61
taf3	1	9-61
qkia	6	9-61	7-38	20-41	17-27	2-12	3-11
elavl4	10	1-31	13-15	2-3	60-62	12-16	17-24	3-11	13-24	27-54	13-15
stau2	2	9-61	11-30
pabpc1b	4	60-62	13-24	27-54	9-61
zranb2	2	9-61	60-62
lef1	5	2-3	11-30	3-11	9-61	5-6
taf7	3	60-62	27-54	9-61
hnrnpabb	6	13-15	12-16	5-6	13-24	7-38	60-62
rpp25b	1	2-12
hnrnpa0a	7	11-30	2-12	13-15	13-24	12-16	5-6	7-38
khdrbs2	3	1-31	3-11	60-62									1	51	0.425
cnbpb	1	12-16											2	34	0.283333
msi2a	1	17-27											3	16	0.133333
raly	1	27-54											4	8	0.0666667
celf4	2	27-54	12-16										5	4	0.0333333
raver2	3	23-25	7-38	60-62									6	3	0.025
celf2	1	23-25											7	4	0.0333333
mbnl2	1	23-25											10	1	0.00833333
msi2b	5	1-31	3-11	60-62	12-16	13-15
stau1	2	1-31	7-38
eif3k	2	1-31	13-15
cirbpb	7	5-6	13-15	3-11	2-3	11-30	60-62	7-38
cirbpa	3	13-24	5-6	7-38
elavl3	2	3-11	5-6
khdrbs1a	4	7-38	11-30	13-15	5-6
nova2	3	5-6	11-30	12-16
eif3m	5	5-6	3-11	60-62	13-15	7-38
chd4a	6	3-11	2-3	13-15	5-6	13-24	7-38
hnrnpr	4	5-6	13-15	3-11	7-38
rbm4.3	4	12-16	11-30	7-38	5-6
syncrip	3	5-6	3-11	7-38
eif2s3	4	3-11	5-6	13-15	7-38
snrpf	3	13-15	5-6	3-11
snrpd3l	3	13-24	5-6	13-15
khdrbs1b	2	23-25	5-6
snrpd1	2	5-6	13-15
nsun2	1	5-6
hnrnph1l	2	5-6	7-38
mex3b	2	11-30	5-6
snrpe	2	13-15	5-6
eif3ha	1	5-6
hnrnpub	2	7-38	5-6
eif3ba	3	13-15	5-6	60-62
ewsr1b	2	5-6	60-62
tia1	1	5-6
nop53	3	3-11	5-6	60-62
eif3ea	2	5-6	7-38
sf3b5	3	13-15	3-11	5-6
snrpb	2	60-62	5-6
eif5a	5	20-41	12-16	13-15	7-38	5-6
eif3s6ip	2	5-6	27-54
eif3g	4	20-41	27-54	60-62	5-6
eif3i	2	60-62	5-6
hnrnpl	4	11-30	13-15	7-38	5-6
khsrp	2	7-38	5-6
ewsr1a	3	11-30	60-62	5-6
hnrnpa1a	2	60-62	5-6
snrpc	2	7-38	5-6
u2af1	1	5-6
hnrnpc	2	5-6	60-62
taf15	1	5-6
nop56	2	5-6	60-62
polr2d	1	3-11
csdc2a	2	3-11	12-16
rbfox1	7	23-25	27-54	11-30	13-24	12-16	2-3	7-38
rbfox3a	4	27-54	13-24	11-30	23-25
trmt9b	1	17-27
eif1b	2	7-38	60-62
eif4a1a	3	13-15	7-38	60-62
larp6a	1	7-38
lsm6	1	7-38
lsm8	1	7-38
snrpg	3	11-30	13-15	7-38
eif2s2	2	7-38	13-15
eif4e1c	3	7-38	13-15	60-62
magoh	1	7-38
larp4ab	1	7-38
sf3a2	2	7-38	60-62
hnrpkl	2	7-38	60-62
elavl1b	1	7-38
eif5	7	20-41	12-16	23-25	7-38	5-6	27-54	13-15
trim13	2	23-25	11-30
srebf2	1	23-25
upf3a	3	23-25	12-16	60-62
eif4a2	1	27-54
lsm4	2	27-54	12-16
papolg	1	27-54
sart3	1	27-54
isg20	2	27-54	60-62
lsm3	1	27-54
snrnp70	1	27-54
slu7	1	27-54
rbm28	1	27-54
eif5a2	2	20-41	12-16
mbnl3	2	20-41	60-62
pcbp4	1	20-41
eif3f	1	13-15
celf3a	2	13-15	60-62
u2af2a	1	13-15
rbm14b	1	60-62
snrpa1	1	60-62
trmt112	1	60-62
sfpq	1	60-62
polr2j	1	60-62
sf3b4	1	60-62
taf13	1	60-62
taf10	1	60-62
rbm25b	1	60-62
eif3s10	1	60-62
u2af2b	1	60-62
hnrnpa1b	2	11-30	60-62
igf2bp3	1	11-30
hnrnpl2	1	11-30
